# Supplementary material for: Protein corona formed on silver nanoparticles in blood plasma is highly selective and resistant to physicochemical changes of the solution
Source: PubMed Central journal article supplement (PMC6592156; doi:10.1039/c8en01054d), 2019-03-18
Supplement: EN-006-C8EN01054D-s001.pdf [file EN-006-C8EN01054D-s001.pdf]

Supplementary material for

## **Protein Corona Formed on Silver Nanoparticles in Blood Plasma is Highly Selective and Resistant to Physicochemical Changes of the Solution**

Vladimir Gorshkov<sup>1#\*</sup>, Julia A. Bubis<sup>2,3#</sup>, Elizaveta M. Solovyeva<sup>2,3#</sup>, Mikhail V. Gorshkov<sup>2</sup>, Frank Kjeldsen<sup>1\*</sup>

<sup>1</sup> Department of Biochemistry and Molecular Biology, University of Southern Denmark, Odense, Denmark

<sup>2</sup> V.L. Talrose Institute for Energy Problems of Chemical Physics, Russian Academy of Sciences, Moscow, Russia

<sup>3</sup> Moscow Institute of Physics and Technology (State University), Dolgoprudny, Moscow Region, Russia

# Authors contributed equally

\* Corresponding author; Address: Campusvej 55, 5230 Odense M, Denmark; e-mail: [vgor@bmb.sdu.dk](mailto:vgor@bmb.sdu.dk); [frankk@bmb.sdu.dk](mailto:frankk@bmb.sdu.dk)

## Materials and Methods

### *Protein corona preparation*

Nanoparticles (3 mL stock solution) were concentrated by centrifugation (5000g, 10 min, 4°C) followed by the addition of 300  $\mu\text{L}$  of pooled normal human blood plasma (Innovative Research, USA) (41.4  $\mu\text{L}$  of plasma per  $\text{cm}^2$  of particle surface). For pH experiments, the pH of blood plasma was adjusted by adding an equal amount of phosphate-citrate buffer solution or Tris-HCl buffer solution (20.7  $\mu\text{L}$  of plasma per  $\text{cm}^2$  of particle surface). The pH of the solution after mixing was measured by micro pH-meter (MP220, Mettler Toledo). Nanoparticles were incubated with plasma in thermoshaker (800 rpm) for 4 hours at pH 4.9, 6.1, 6.8, 7.7, 8.9 and constant temperature 30°C or, at temperature 4, 17, 30, 41, 47°C and constant pH 7.9. Corona formation was confirmed by DLS (typical particle diameter after the incubation was  $\sim 200$  nm). Nanoparticles bearing protein corona were separated by centrifugation (10000g, 10 min) and washed three times with 1x PBS (10 mM  $\text{Na}_2\text{HPO}_4$ , 2.7 mM KCl, 137 mM NaCl, P4417 (Sigma)) changing the tube after each wash to eliminate unspecific protein binding. Low binding plastic was used on all sample preparation steps. Each experiment was performed in triplicate with particle-free control.

### *Protein corona isolation and digestion*

Particles with protein corona were placed in 150  $\mu\text{L}$  of 8M urea in 25 mM ammonium bicarbonate buffer (ABC), sonicated for 5 minutes and kept for 10 minutes at room temperature (repeated twice). Proteins were reduced by dithiothreitol (final concentration 10 mM, 1 hour, 37°C) and alkylated by iodoacetamide (final concentration 20 mM, 30 min, room temperature, in dark). The solution was diluted with 115  $\mu\text{L}$  of 25 mM ABC (4M final urea concentration) and digested with Lys-C (1:50, 3 hours, 37°C). Later 900  $\mu\text{L}$  of 25mM ABC (1M final urea concentration) was added to the solution and it was digested with trypsin (1:50, overnight, 37°C). Nanoparticles were removed by centrifugation (15000g, 10 min, 25°C). The sample was concentrated in SpeedVac to the volume of  $\sim 300\mu\text{L}$  and purified by C18 StageTips (Thermo Fisher Scientific). Purified peptides were dried completely in SpeedVac and stored at  $-20^\circ\text{C}$  until LC-MS analysis.

### *LC-MS analysis*

Samples ( $\sim 1$   $\mu\text{g}$  on the column) were analyzed by Q-Exactive HF mass spectrometer (Thermo Scientific, Bremen, Germany) coupled with UltiMate 3000 nanoflow LC system (Thermo Scientific, Germering, Germany). Trap column ( $\mu$ -Precolumn C18 PepMap100, Thermo Scientific, 5 $\mu\text{m}$ , 300 $\mu\text{m}$  i.d. 5 mm, 100 $\text{\AA}$ ) and analytical column (EASY-Spray PepMap RSLC C18, Thermo Scientific, 2  $\mu\text{m}$ , 75 $\mu\text{m}$  i.d. 500 mm, 100 $\text{\AA}$ ) heated to 50°C were employed for separations. Mobile phases were as follows: (A) 0.1% FA in water; (B) 95% ACN, 0.1% FA in water. Samples were pre-concentrated for 10 min on the trap column at 2%B. Then, peptides were eluted using the following gradient: from 2%B to 20%B in 52.5 min, from 20%B to 32%B in 7.5 minutes at 270  $\text{nL}\cdot\text{min}^{-1}$  flow rate. The column was washed at 95%B for 10 minutes and equilibrated to the start concentration of mobile phase B.

Mass spectrometry measurements were performed using data-dependent acquisition (DDA) mode (Top 12). Electrospray voltage was set to 2.0 kV. Electrospray capillary temperature was 275°C. MS1 settings were as follows: mass range from 300 to 1400 Th, resolving power of 120,000 at  $m/z$  200, maximum injection time

was set to 100 ms, the automatic gain control (AGC) for MS1 was 3.0e6. Precursor ions were isolated with the m/z window of 1.4 Th followed by their fragmentation using higher-energy collision dissociation (HCD) using normalized collision energy (NCE) of 27, the dynamic exclusion was set to 20 s. Fragment ions were measured in the Orbitrap mass-analyzer with resolving power of 15,000 at m/z 200. Maximum injection time during MS/MS was 100 ms with AGC value of 1.0e5.

### ***Search database***

Plasma proteome database [1] was downloaded in XML format from the official website – <http://www.plasmaproteomedatabase.org/> (access date: 09.12.2016). Uniprot accession number, information about the experimental evidence, and reported plasma concentration were parsed from the XML files. Only database entries having more than one experimental evidence and at least one indicating that the protein was detected in plasma with valid Uniprot accession number were preserved. The most recent version of protein sequences was obtained from Uniprot via programming interface using accession numbers. If the plasma proteome database entry had several accession numbers assigned, each of them was added individually. Duplicate protein sequences were discarded. The number of proteins in the database after refinement was 3776. The sequences of common contaminants (226 proteins), as used in MaxQuant [2], were added to the database. Finally, the reversed decoy database was concatenated and saved in common FASTA format. All data manipulations were performed using Python (3.6.3) script.

### ***Data analysis***

Mass spectrometry data was converted to mzML format using msconvert from ProteoWizard (3.0.9248) [3] and searched with MSGF+ (2016.12.12) [4] against protein database described earlier. Carbamidomethylation of cysteine was used as fixed modification, variable modifications included methionine oxidation, acetylation of protein N-terminus, and carbamylation of peptide N-terminus and lysine. Parent mass tolerance was set to 10 ppm and instrument was set to Q-Exactive. Identifications of all samples in the same experiment (i.e., pH and temperature perturbation) were merged and validated by Percolator (3.01) [5], protein inference was performed by picked protein algorithm, protein FDR was restricted to 0.01. Feature detection, alignment between LC-MS runs and peptide quantification was performed by corresponding tools from OpenMS (2.1.0) [6]. Protein abundance was calculated as a median abundance of three most abundant peptides (Top3). Proteins having less than 3 quantified peptides were excluded. Protein abundancies for each replicate were corrected by subtracting abundancies of the same protein found in the corresponding particle-free control sample. Integration of all tools was programmed in Python (3.6.3).

### ***Differentially abundant proteins***

The log<sub>10</sub>-transformed abundancies of proteins detected in all tested conditions (y) and temperature or pH values (x) were scaled to [0, 1] interval. The relationship was modeled by the sigmoid curve

$$y = \frac{1}{1 + e^{-k(x-x_0)}}.$$

Parameters  $k$  and  $x_0$  were selected using non-linear least squares optimization (**curve\_fit** from **scipy** module). The fraction of explained variability was required to be higher than 0.5 for the successful fit.

$$1 - \frac{\sum(y' - \bar{y})^2}{\sum(y - \bar{y})^2} > 0.5, \text{ where } y' - \text{ predicted value and } \bar{y} - \text{ is the average value}$$

Reversed scaling transformation was applied for the optimized  $x_0$  to obtain critical condition; the sign of  $k$  indicated the direction of change.

### ***Minimal spanning tree***

The values for amino acid indices for 544 protein parameters presenting in the Kyoto database [7] (v. 9.1) were downloaded from the official website (<http://www.genome.jp/aaindex/>). Properties annotation as **composition**, **physicochemical property**, **beta propensity**, **other property**, **alpha and turn propensity**, and **hydrophobicity** were extracted from Tomii et al. [8]. Since the paper used an earlier version of Kyoto database only 402 properties got annotations, the others were annotated as **undefined**. Cytoscape (3.6.0) was used to perform network analysis. All pairwise distances between protein properties were calculated as  $1 - |R|$ , where  $R$  is Pearson's correlation coefficient between amino acid indices and used to build minimal spanning tree by Kruskal's algorithm using cySpanningTree (1.1) plugin for Cytoscape. Interactive visualization of the complete spanning tree can be accessed at <https://caetera.github.io/AgNPCorona>

### ***Lessening analysis***

Amino acid indices from Kyoto database were used to calculate the numerical value of each property (544 in total) for all proteins in the protein database (created earlier). The distributions of each individual property for persistent proteins i.e. quantified in all perturbation conditions (189 in temperature experiment, and 173 in pH experiment) and for all proteins in the database were compared. The dispersion of the distribution was calculated as the difference between 10<sup>th</sup> and 90<sup>th</sup> percentiles and used to calculate the change in dispersion (lessening).

$$\text{Lessening} = \frac{{}_{Pers}C^{90} - {}_{Pers}C^{10}}{{}_{All}C^{90} - {}_{All}C^{10}},$$

${}_{Pers}C^{90}$  and  ${}_{Pers}C^{10}$  – 90<sup>th</sup> and 10<sup>th</sup> percentiles of property  $C$  for persistent proteins,

${}_{All}C^{90}$  and  ${}_{All}C^{10}$  – 90<sup>th</sup> and 10<sup>th</sup> percentiles of property  $C$  for all proteins

Significance was estimated by a permutation test. The test was performed in the following way. The distribution of the lessening under null-hypothesis was estimated by sampling (100000 times) a subset of proteins without repetition from the complete population. The size of this subset was the same as the size of the persistent group in the corresponding experiment (i.e. 189 or 173). The lessening was calculated using this subset as the persistent group. The resulting distribution was fitted by the normal one. The parameters were calculated using non-linear least squares optimization (**curve\_fit** from **scipy** module). The p-value was

calculated as cumulative distribution function (two-tailed) of the fitted normal distribution. Resulting p-values were corrected using Benjamini-Hochberg method.

Protein properties in **alpha and turn propensities** and **beta propensity** groups displaying significant change in the distribution for persistent fraction were manually assigned a coefficient (1, or -1) indicating, if the increase in numerical value indicates the increase in the corresponding property, for example, an increase of beta-sheet content in the protein (coefficient 1) or vice versa (coefficient -1). The coefficients for properties in hydrophobicity group were calculated as the sign of the difference between the numeric value for isoleucine (hydrophobic) and aspartic acid (hydrophilic). The coefficients were used to calculate the direction of change (expressed as the difference between median values) in the persistent protein fraction relative to the background. Alpha and turn propensities were split into two separate groups.

All used scripts are published on GitHub: <https://github.com/caetera/AgNPCorona>

## Supplementary Figures

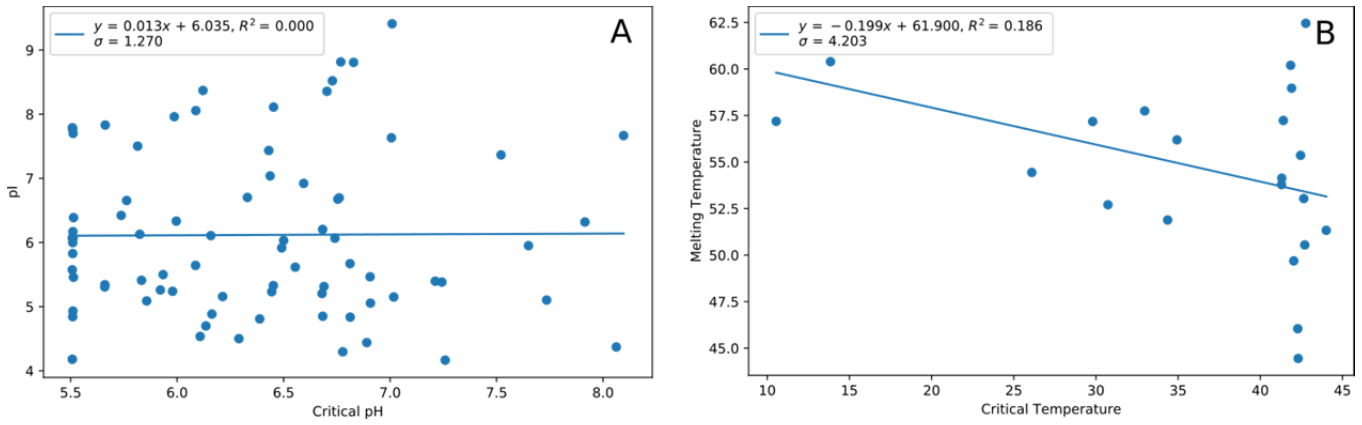

**Figure S1.** Correlation of critical pH and isoelectric point (A) and critical temperature with the melting temperature (B) for differentially abundant protein

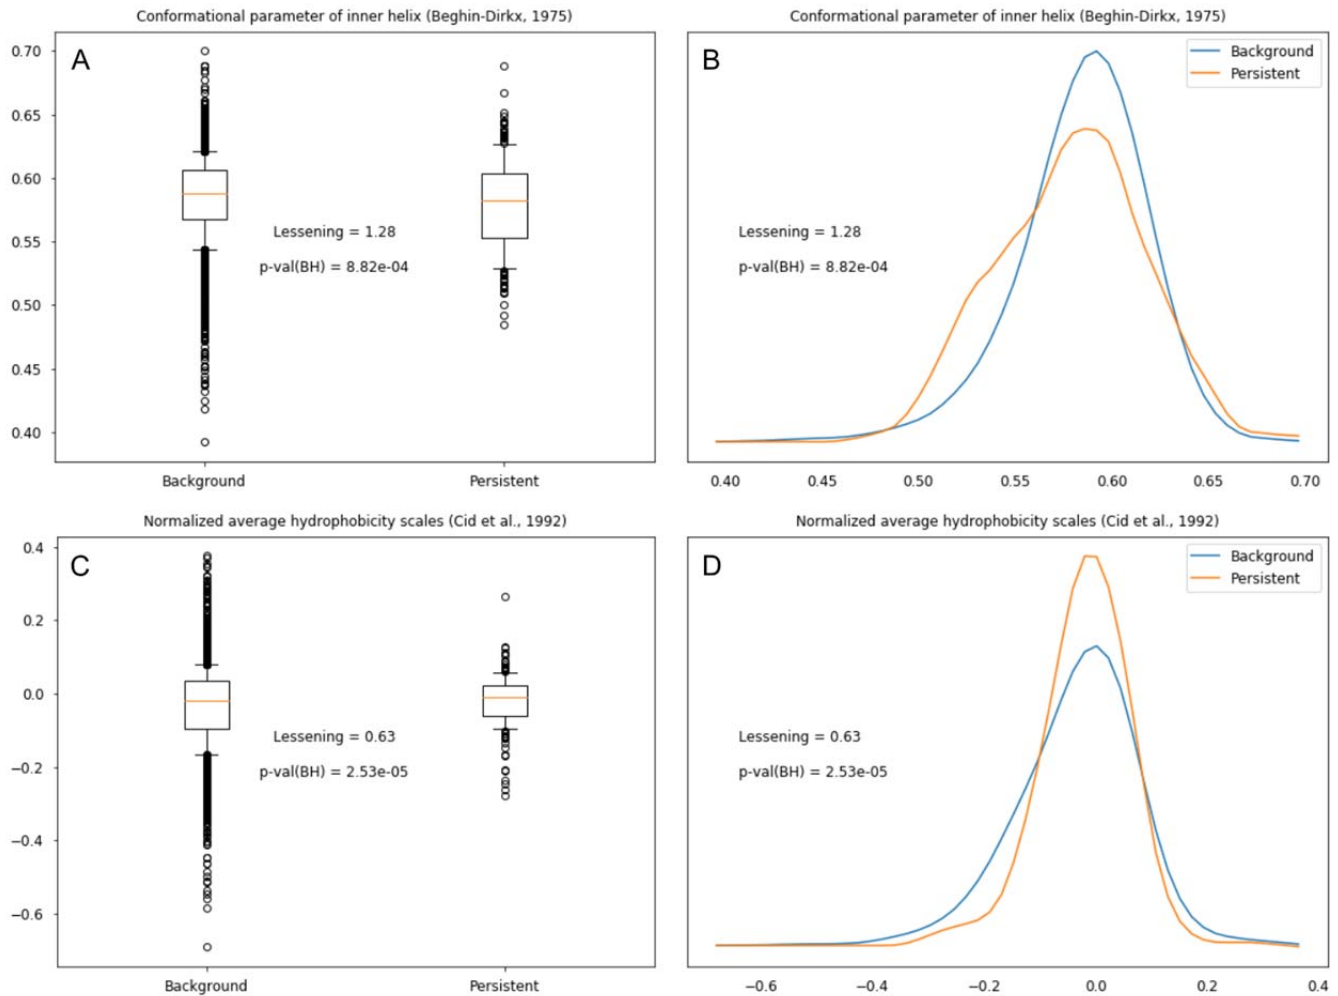

**Figure S2.** Example of dispersion change (lessening) analysis. (A) The persistent proteins have wider spread, than background – lessening  $> 1$ ; (C) distribution of numerical values of the corresponding protein property, additional second component can be observed; (B) the persistent proteins have narrower spread, than background – lessening  $< 1$ ; (D) value distribution for persistent proteins is narrower and has one

component. The significance is estimated by permutation test and corrected according to Benjamini-Hochberg. The whiskers on boxplots show the 10<sup>th</sup> and 90<sup>th</sup> percentile of the distribution.

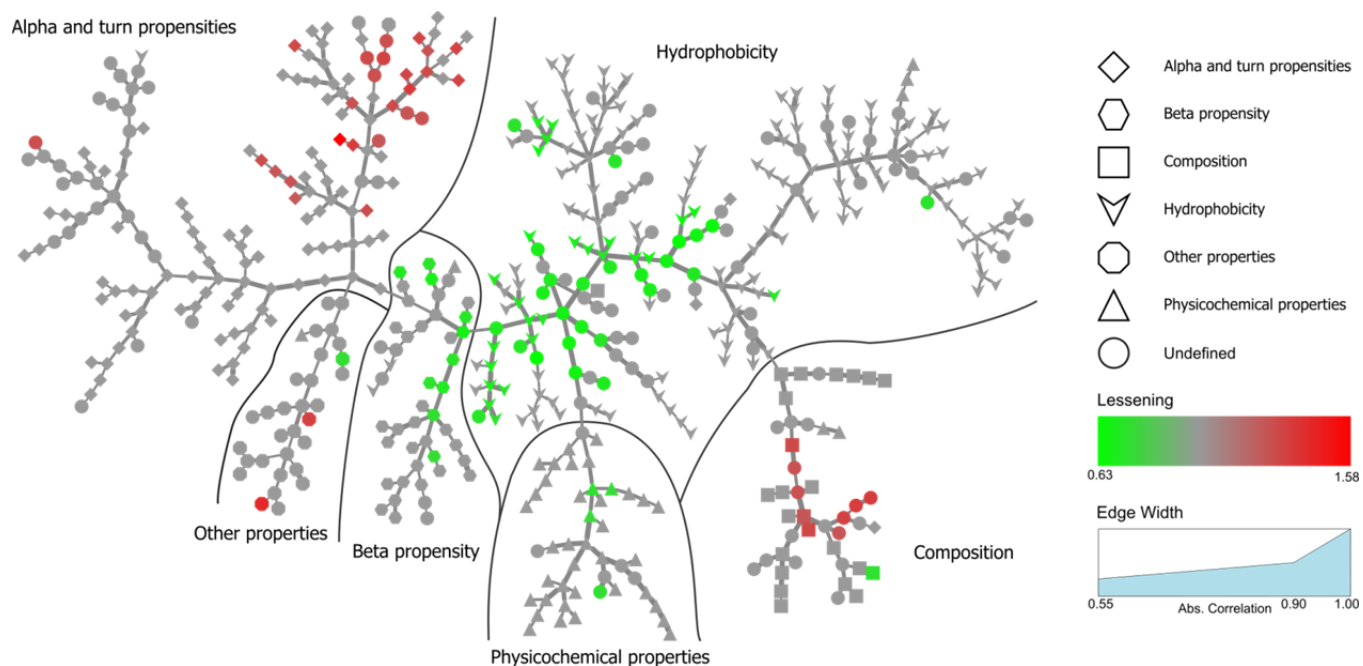

**Figure S3.** Minimum spanning trees for the pH perturbation experiment. Properties are divided into six main categories and individual properties are color coded according to the degree of lessening in spread between persistent proteins and proteins found in plasma. Only nodes corresponding to significant changes (FDR < 0.005) are colored.

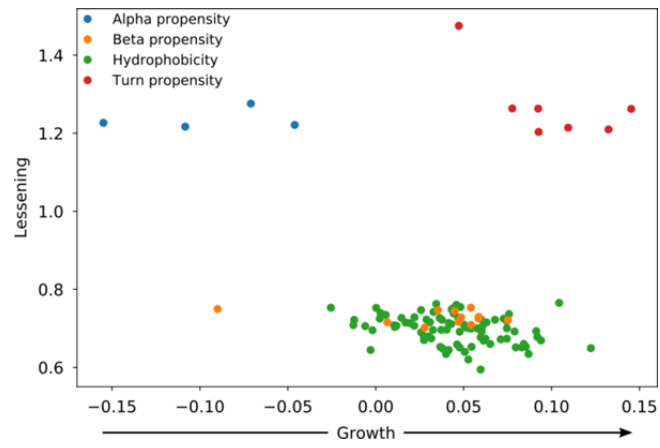

**Figure S4.** The direction of change for protein properties displaying significant lessening or broadening of distribution in persistent protein fraction.



## Supplementary Tables

**Table S1.** Number of proteins in each protein classes

| Experiment  | Class I | Class II | Class III |
|-------------|---------|----------|-----------|
| Temperature | 123     | 32       | 34        |
| pH          | 96      | 59       | 18        |

## References

1. Nanjappa, V., et al., *Plasma Proteome Database as a resource for proteomics research: 2014 update*. Nucleic Acids Res, 2014. **42**(Database issue): p. D959-65.
2. Cox, J. and M. Mann, *MaxQuant enables high peptide identification rates, individualized p.p.b.-range mass accuracies and proteome-wide protein quantification*. Nat Biotechnol, 2008. **26**(12): p. 1367-72.
3. Chambers, M.C., et al., *A cross-platform toolkit for mass spectrometry and proteomics*. Nat Biotechnol, 2012. **30**(10): p. 918-20.
4. Kim, S. and P.A. Pevzner, *MS-GF+ makes progress towards a universal database search tool for proteomics*. Nat Commun, 2014. **5**: p. 5277.
5. The, M., et al., *Fast and Accurate Protein False Discovery Rates on Large-Scale Proteomics Data Sets with Percolator 3.0*. J Am Soc Mass Spectrom, 2016. **27**(11): p. 1719-1727.
6. Rost, H.L., et al., *OpenMS: a flexible open-source software platform for mass spectrometry data analysis*. Nat Methods, 2016. **13**(9): p. 741-8.
7. Kawashima, S., et al., *AAindex: amino acid index database, progress report 2008*. Nucleic Acids Res, 2008. **36**(Database issue): p. D202-5.
8. Tomii, K. and M. Kanehisa, *Analysis of amino acid indices and mutation matrices for sequence comparison and structure prediction of proteins*. Protein Eng, 1996. **9**(1): p. 27-36.

**Differentially abundant proteins in pH experiment**

Fructose-bisphosphate aldolase B (ALDOB)

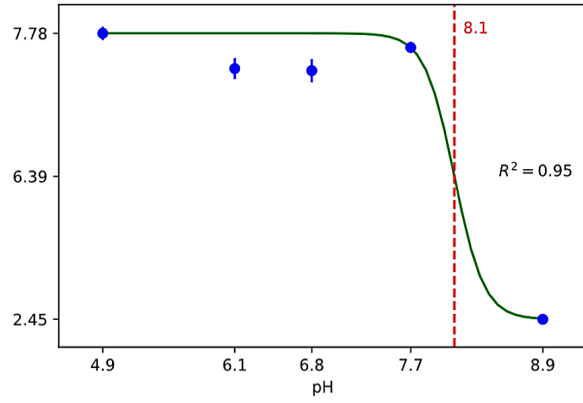

Apolipoprotein A-IV (APOA4)

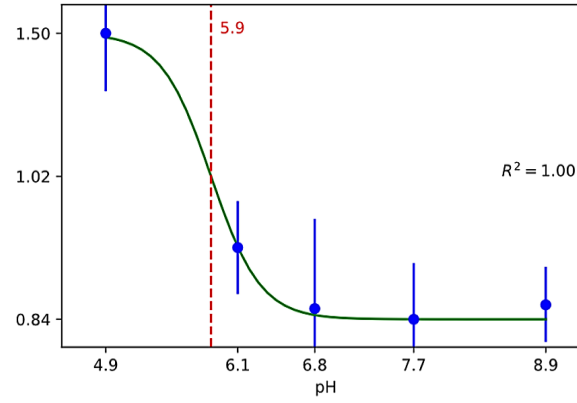

Beta-2-microglobulin (B2M)

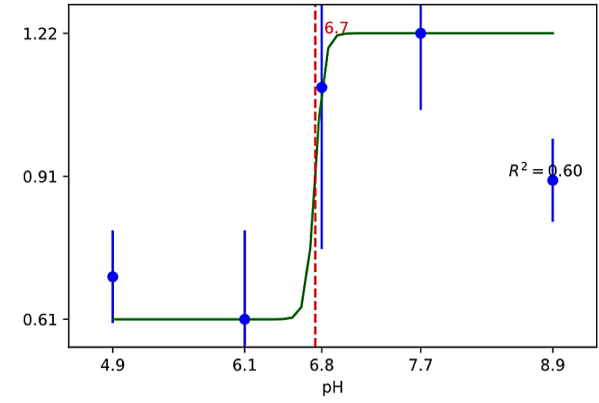

Alpha-1B-glycoprotein (A1BG)

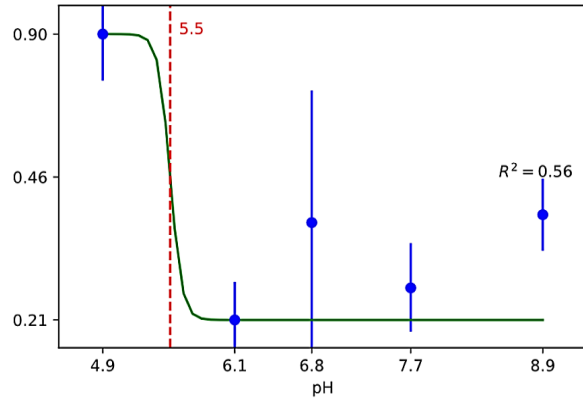

Apolipoprotein A-I (APOA1)

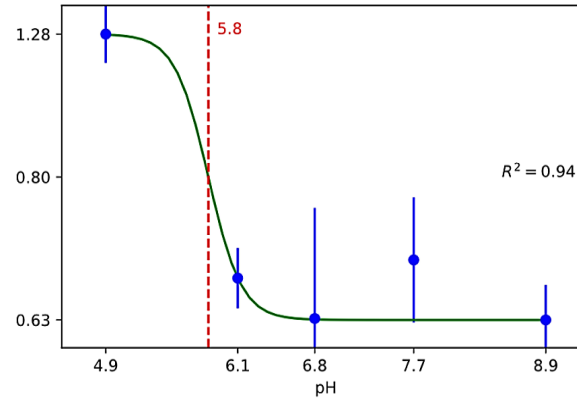

Apolipoprotein F (APOF)

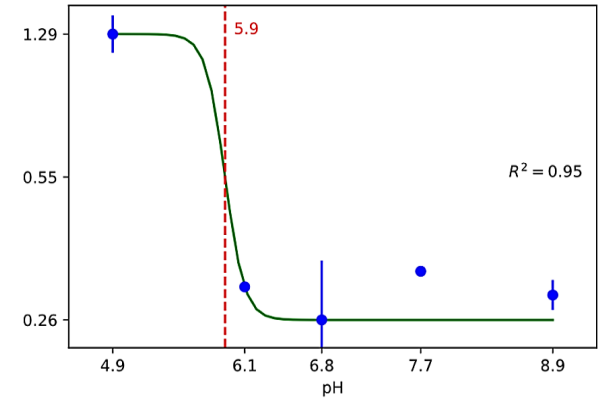

14-3-3 protein epsilon (YWHAE)

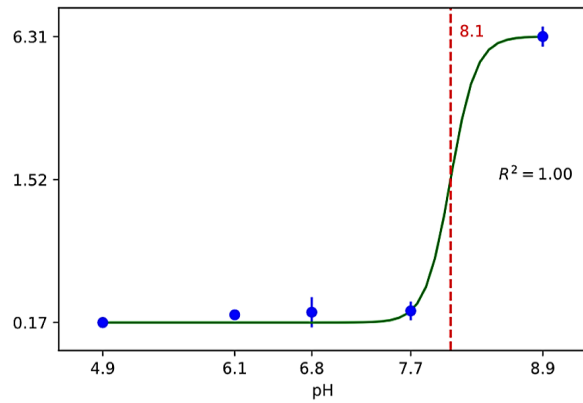

Ankyrin-1 (ANK1)

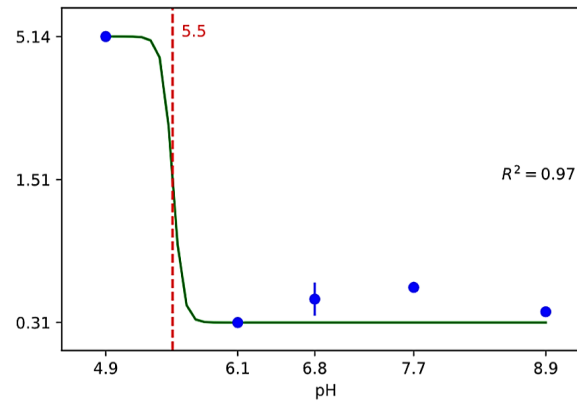

Apolipoprotein E (APOE)

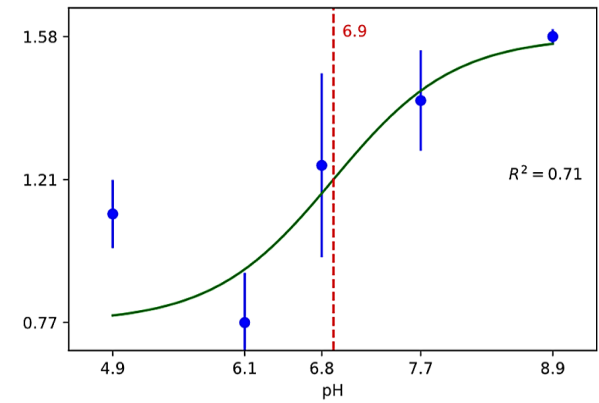

C4b-binding protein alpha chain (C4BPA)

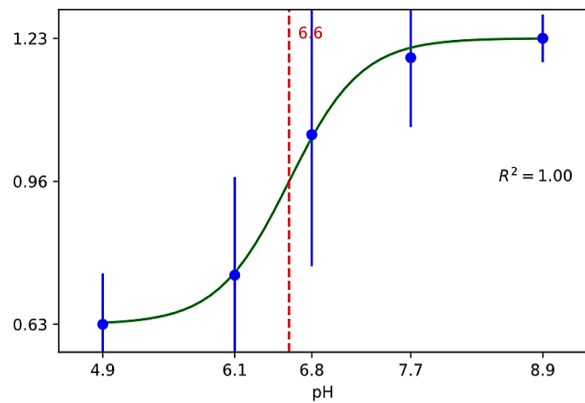

Complement component C7 (C7)

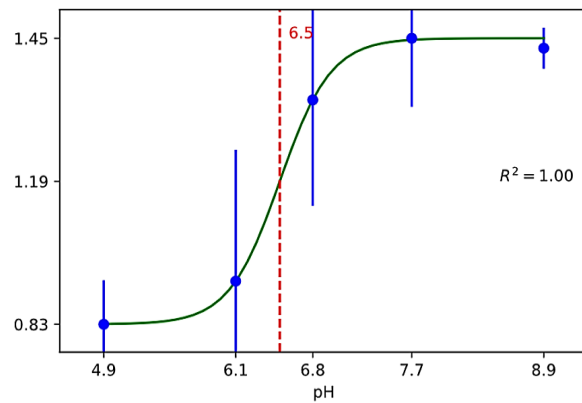

Calnexin (CANX)

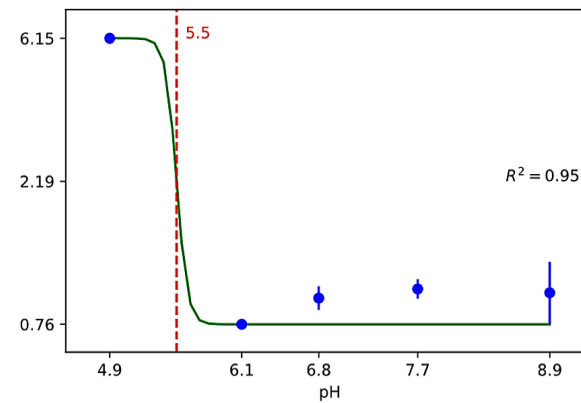

Complement C1q subcomponent subunit B (C1QB)

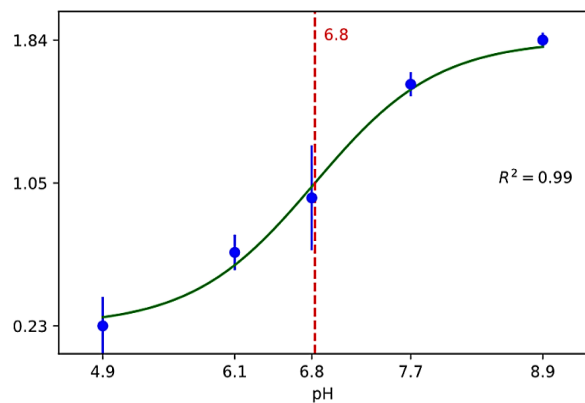

Complement C5 (C5)

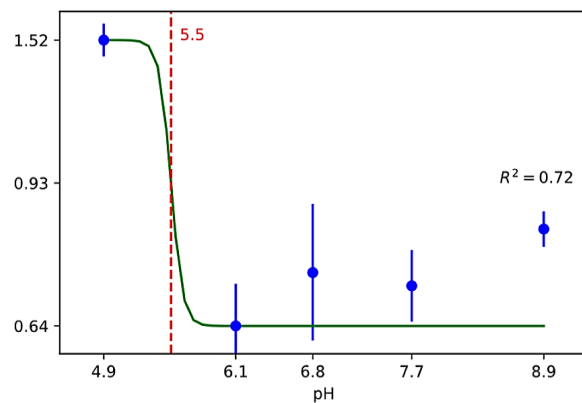

Complement component C9 (C9)

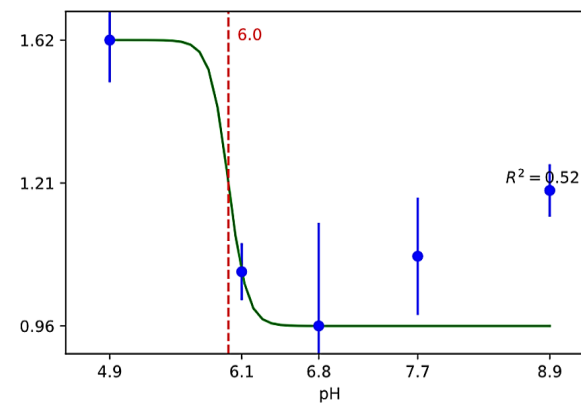

Complement C1q subcomponent subunit A (C1QA)

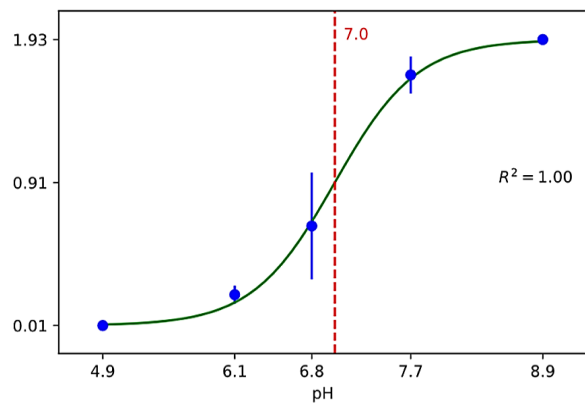

C4b-binding protein beta chain (C4BPB)

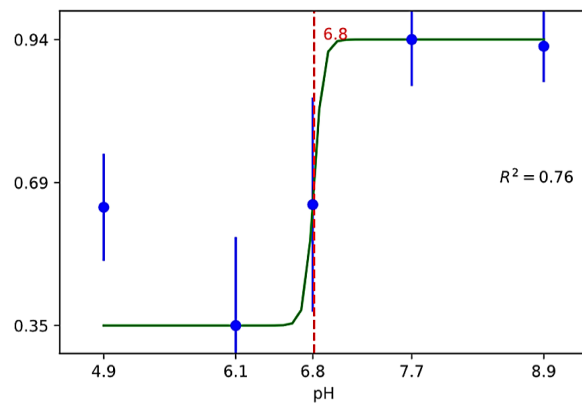

Complement component C8 gamma chain (C8G)

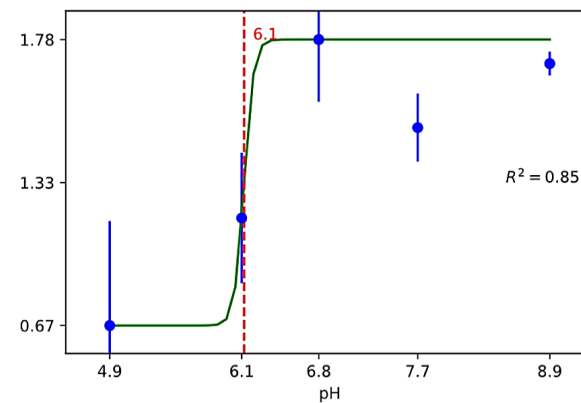

Platelet glycoprotein 4 (CD36)

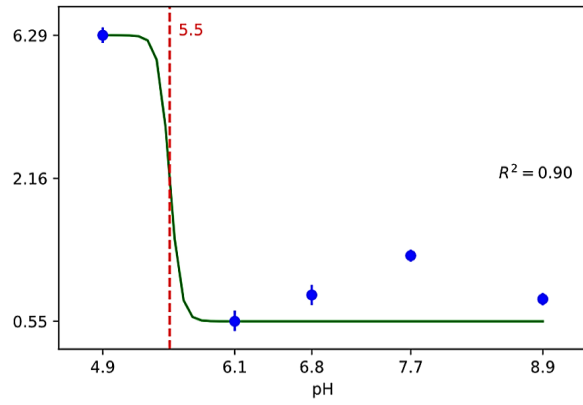

Clathrin heavy chain 1 (CLTC)

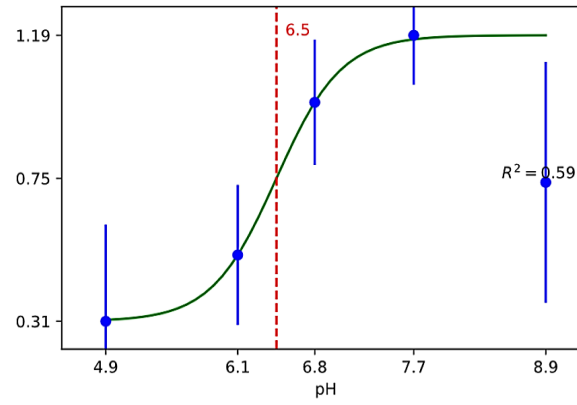

Prothrombin (F2)

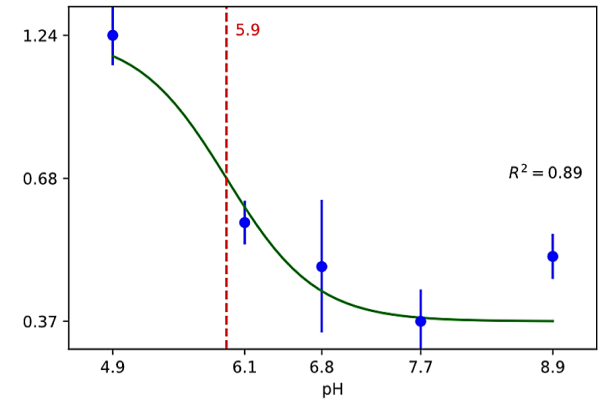

Caveolae-associated protein 2 (CAVIN2)

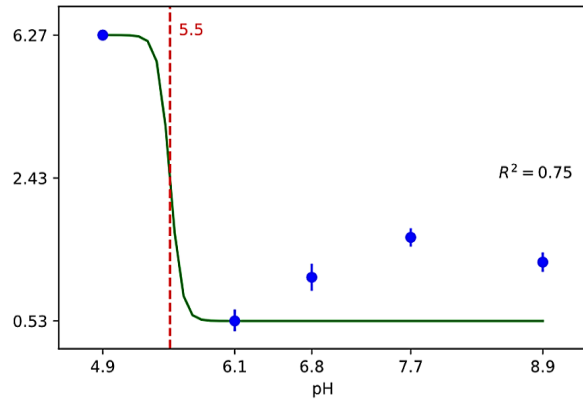

Complement factor H-related protein 5 (CFHR5)

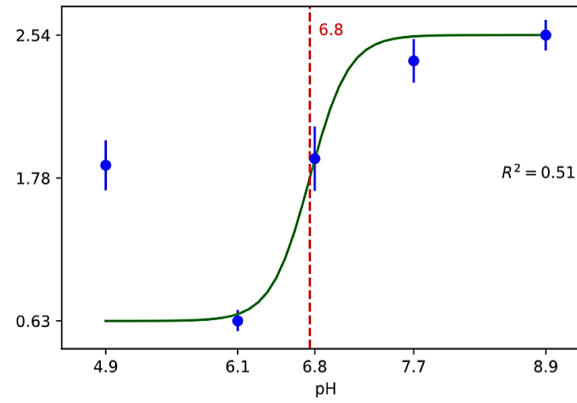

Neutrophil defensin 1 (DEFA1)

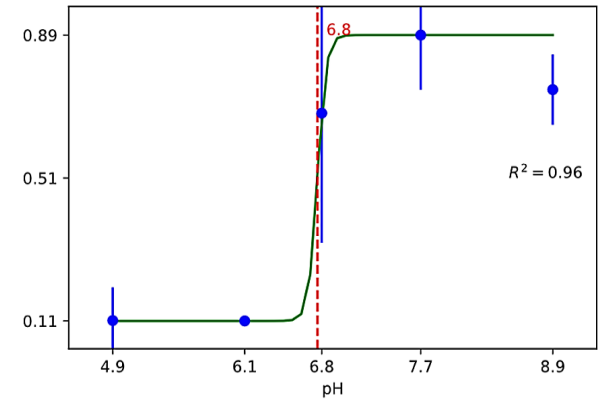

Calpain small subunit 1 (CAPNS1)

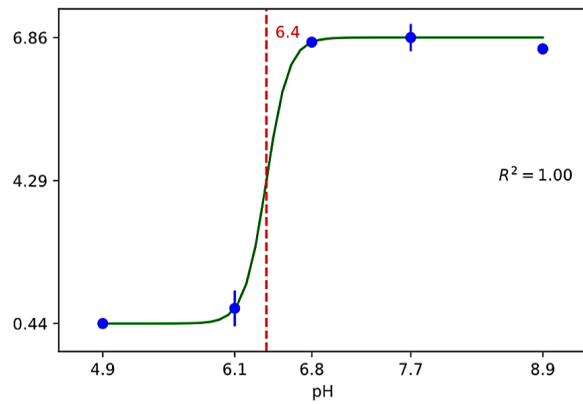

Complement factor D (CFD)

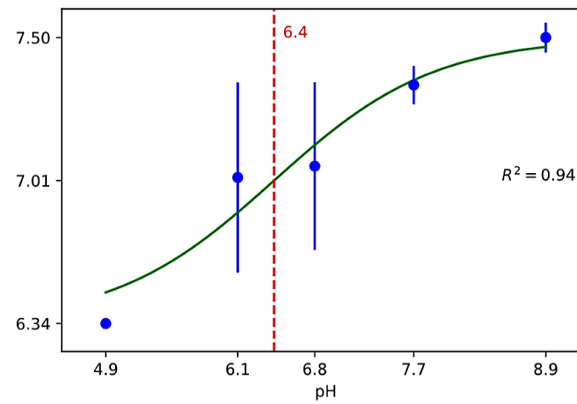

Ceruloplasmin (CP)

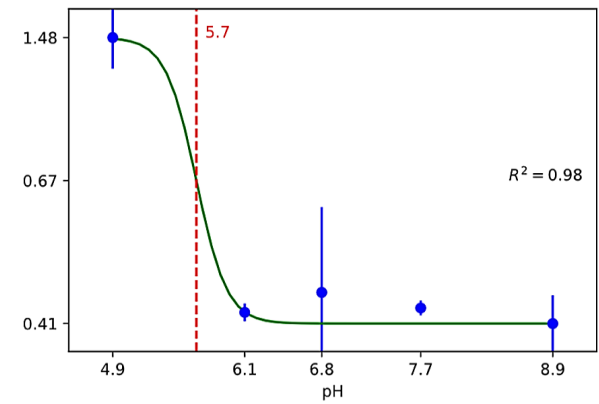

Coagulation factor XIII A chain (F13A1)

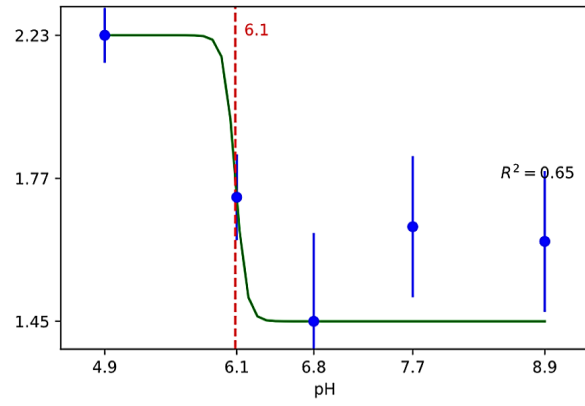

Filamin-A (FLNA)

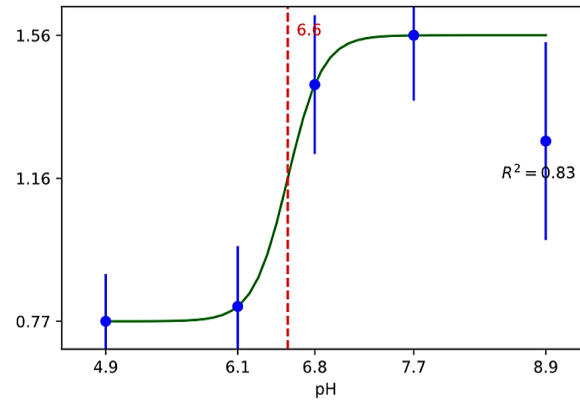

Glutathione peroxidase 3 (GPX3)

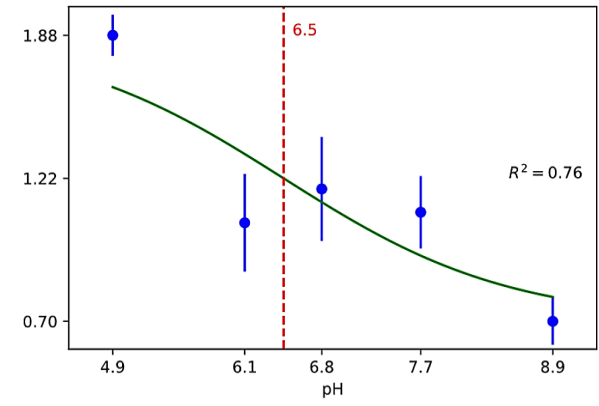

Coagulation factor XI (F11)

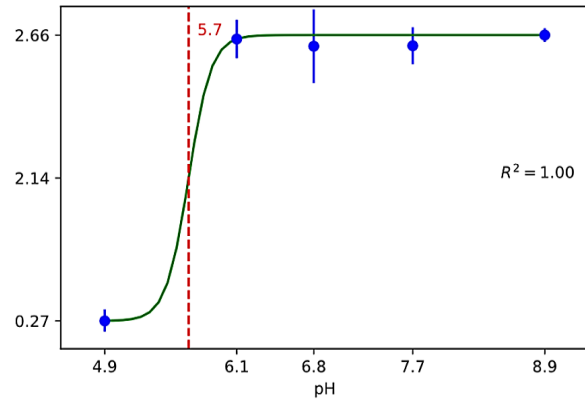

Ficolin-3 (FCN3)

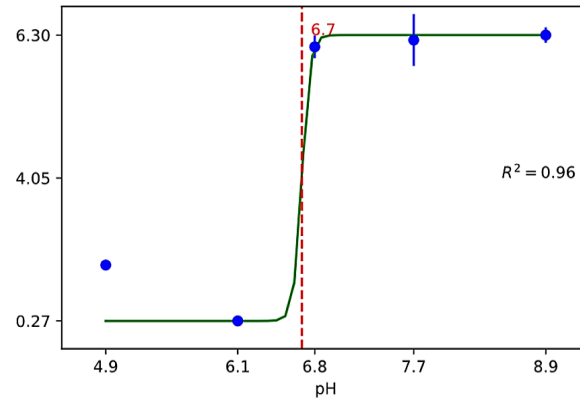

Glutathione peroxidase 1 (GPX1)

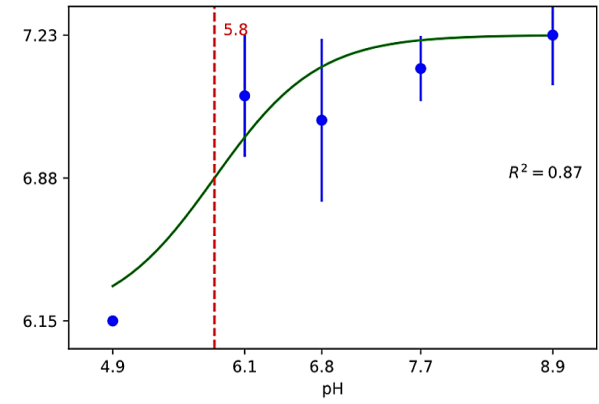

Coagulation factor IX (F9)

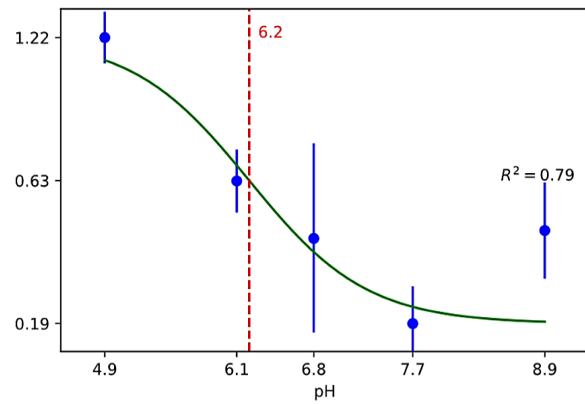

Coagulation factor XIII B chain (F13B)

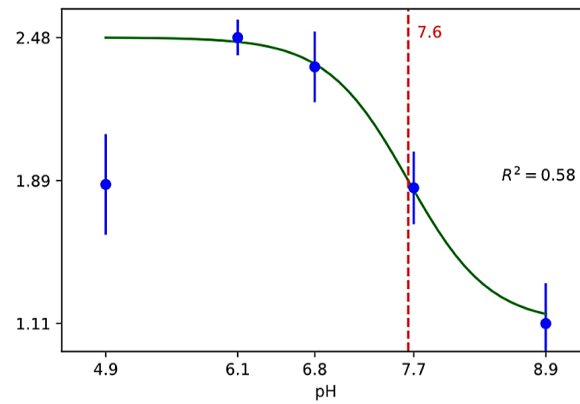

Vitamin D-binding protein (GC)

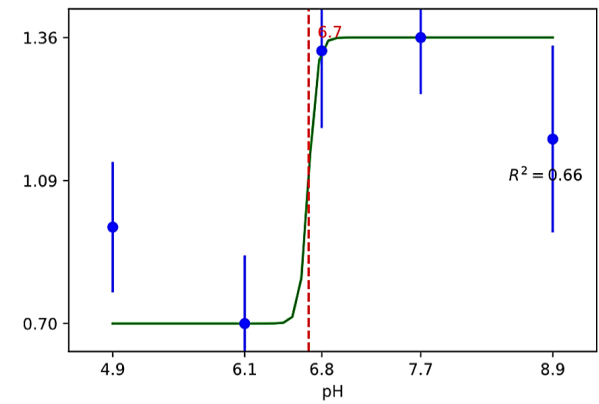

Heat shock cognate 71 kDa protein (HSPA8)

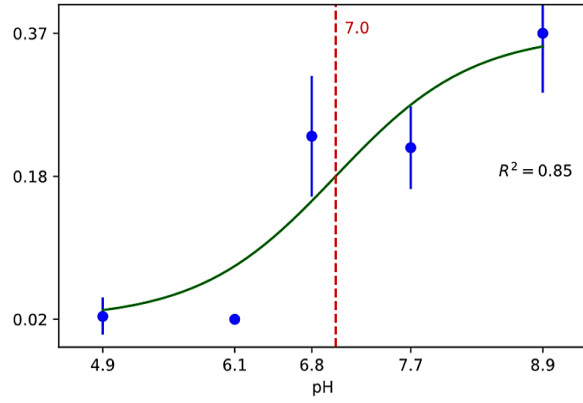

Immunoglobulin heavy constant gamma 1 (IGHG1)

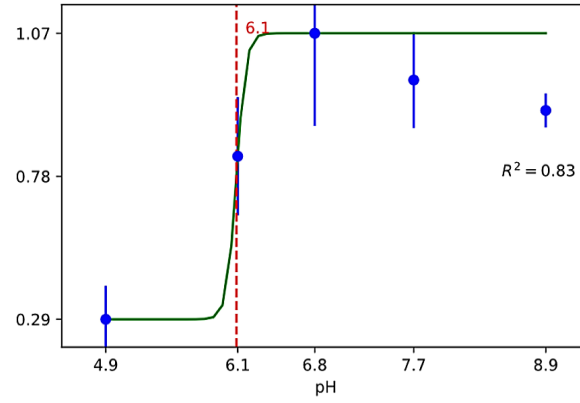

Inter-alpha-trypsin inhibitor heavy chain H2 (ITIH2)

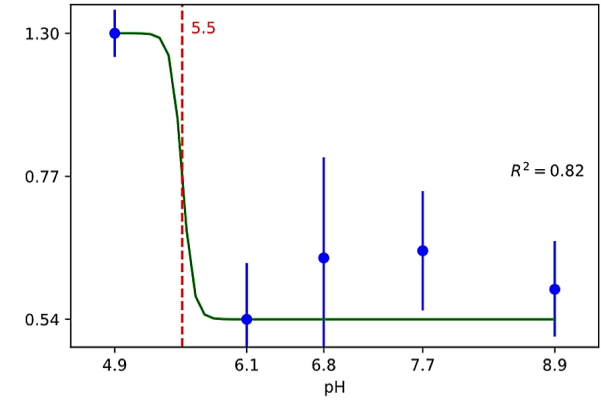

Haptoglobin-related protein (HPR)

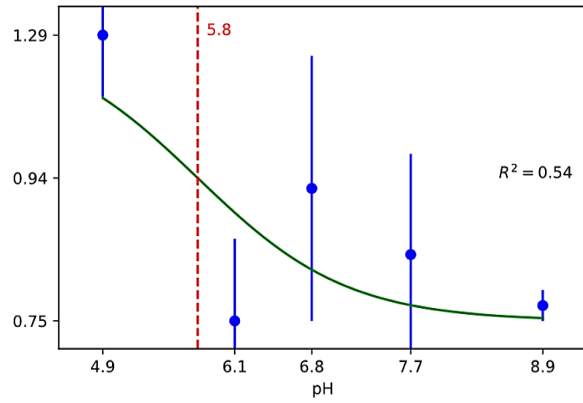

I-like growth factor-binding protein complex acid labile subunit (

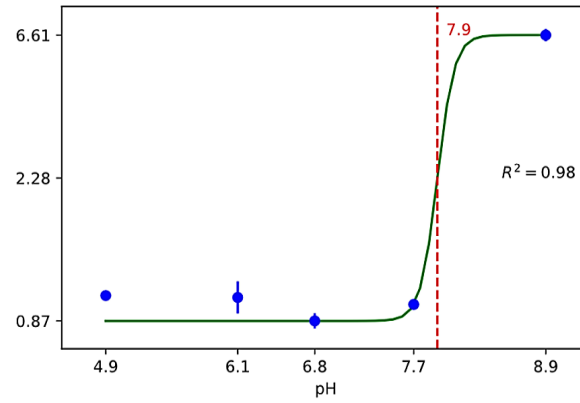

Integrin beta-1 (ITGB1)

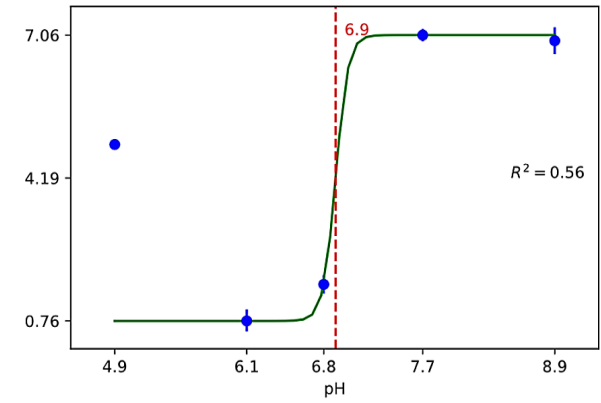

Haptoglobin (HP)

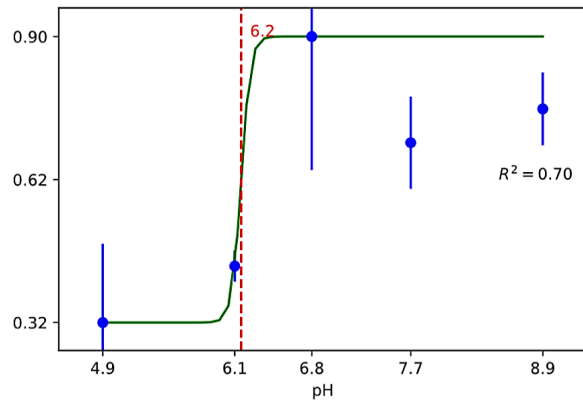

Isocitrate dehydrogenase [NADP], mitochondrial (IDH2)

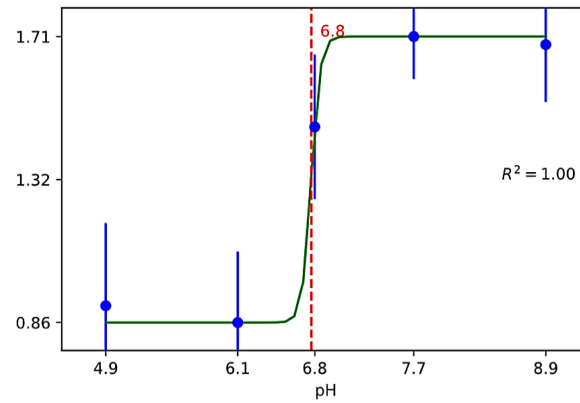

Immunoglobulin heavy constant gamma 4 (IGHG4)

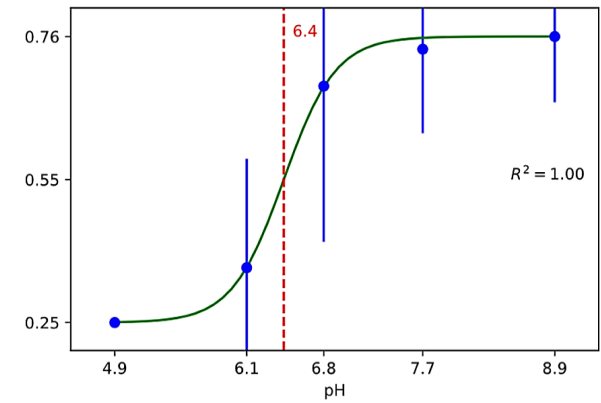

Plasma kallikrein (KLKB1)

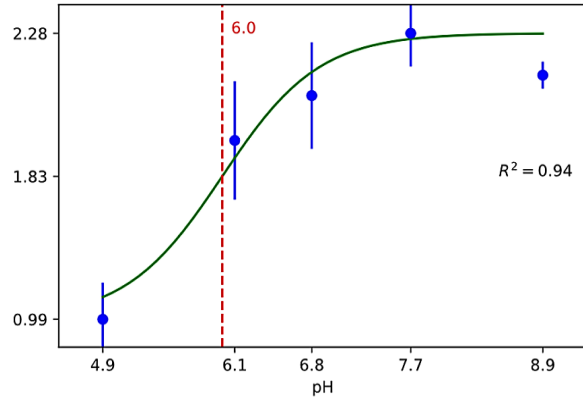

Mannan-binding lectin serine protease 2 (MASP2)

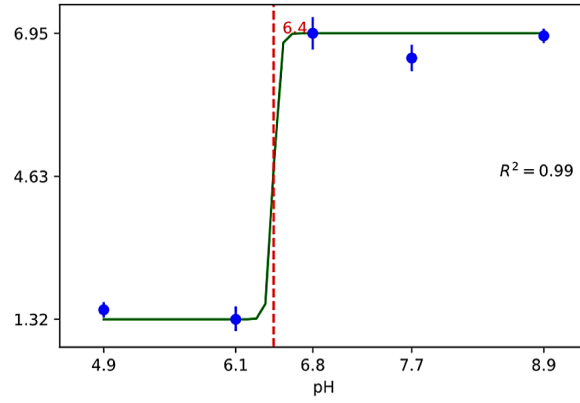

Hepatocyte growth factor-like protein (MST1)

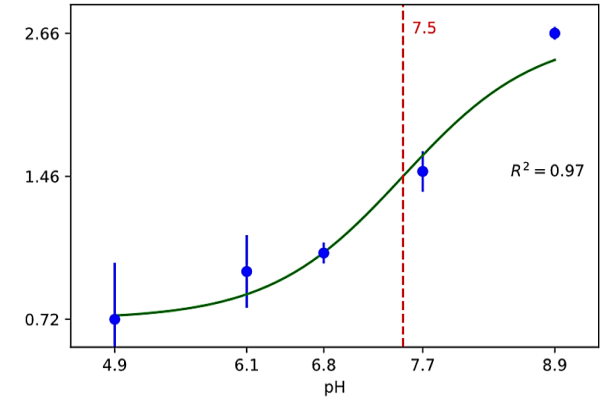

Immunoglobulin J chain (JCHAIN)

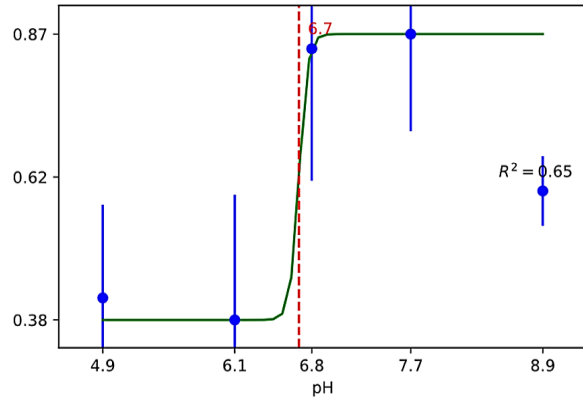

and senescent cell antigen-like-containing domain protein 1 (LI)

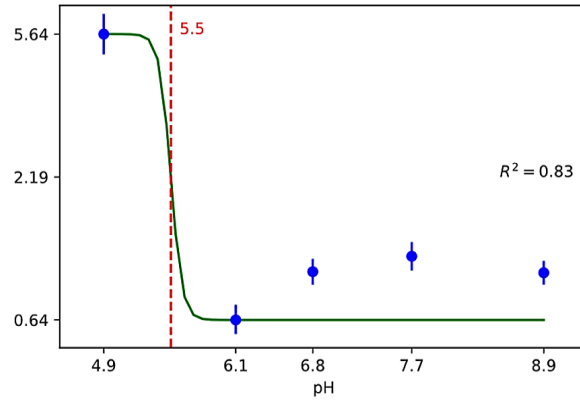

Moesin (MSN)

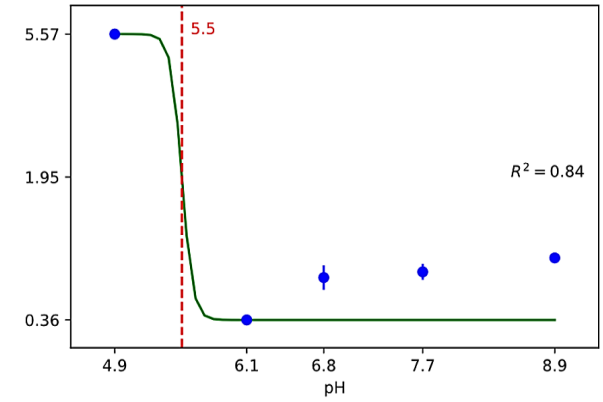

Inter-alpha-trypsin inhibitor heavy chain H3 (ITI3)

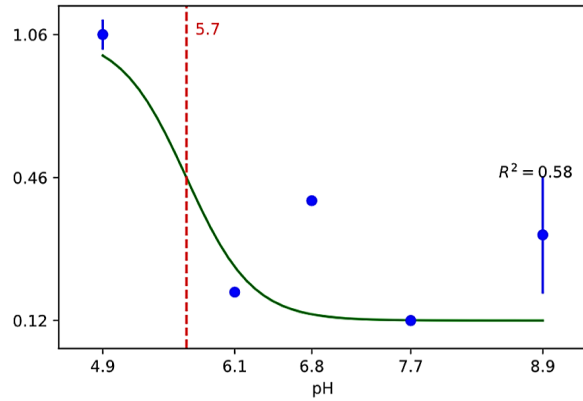

Kininogen-1 (KNG1)

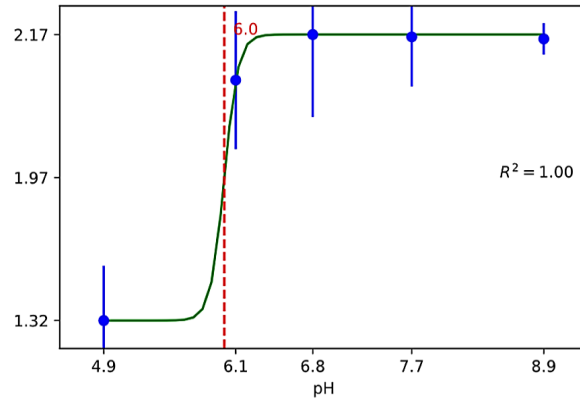

Multimerin-1 (MMRN1)

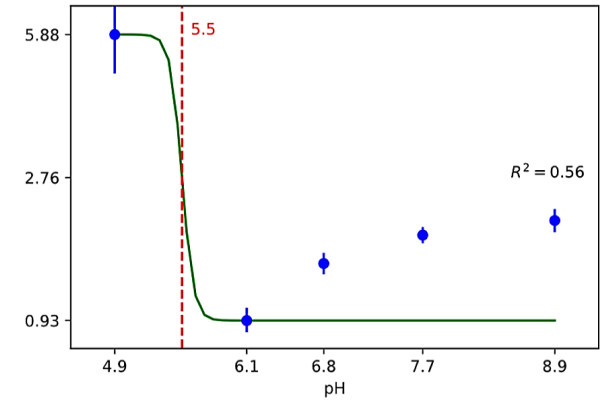



Protein disulfide-isomerase (P4HB)

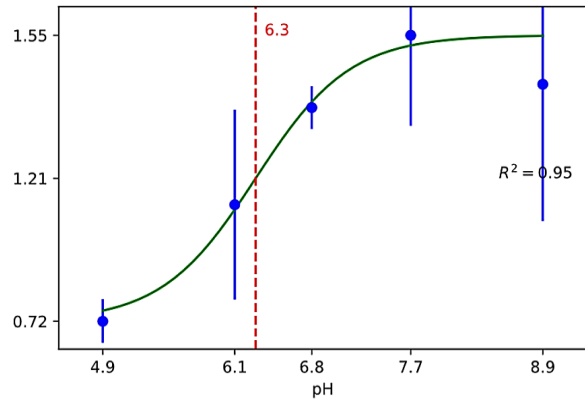

Pyruvate kinase PKM (PKM)

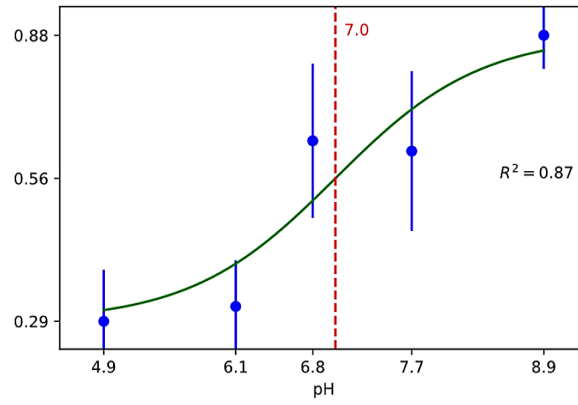

Kallistatin (SERPINA4)

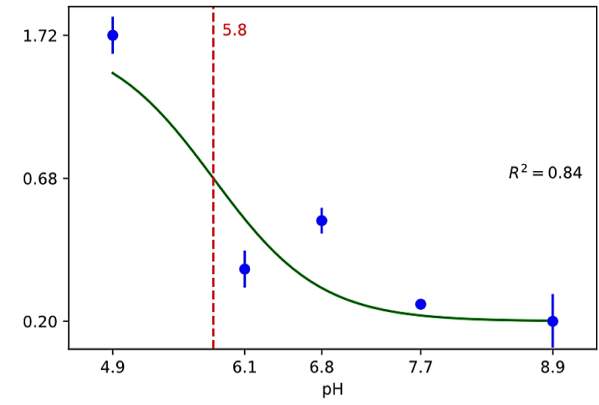

Alpha-1-acid glycoprotein 1 (ORM1)

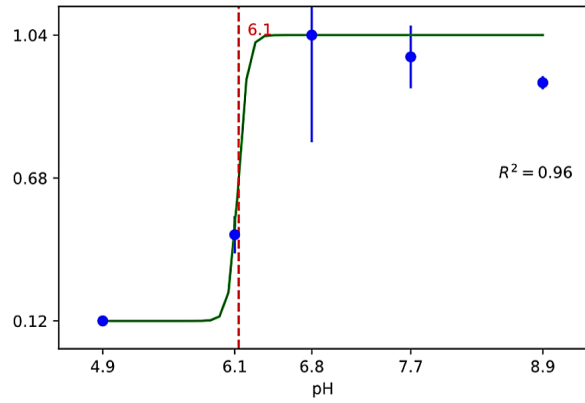

Profilin-1 (PFN1)

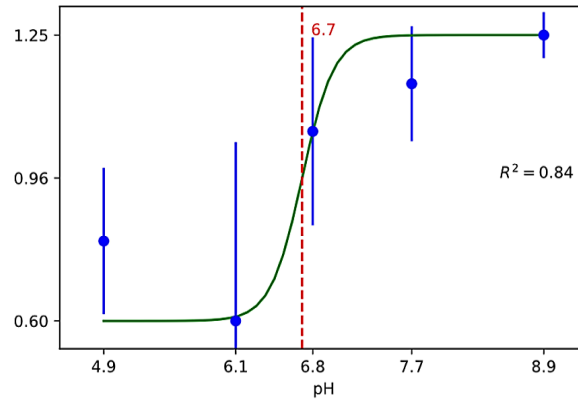

Reticulon-4 (RTN4)

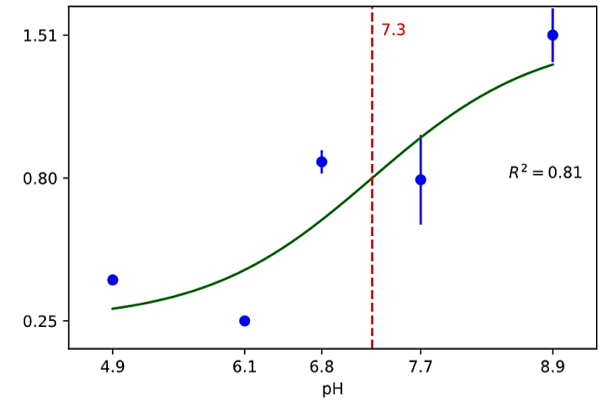

Myosin light polypeptide 6 (MYL6)

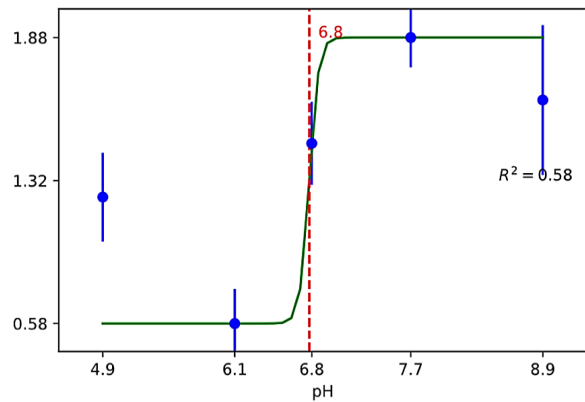

Protein disulfide-isomerase A3 (PDIA3)

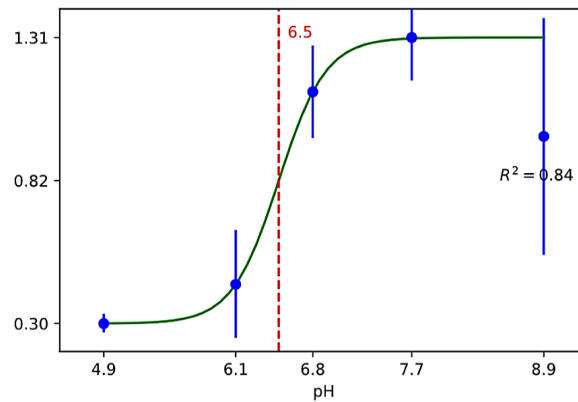

Serum paraoxonase/arylesterase 1 (PON1)

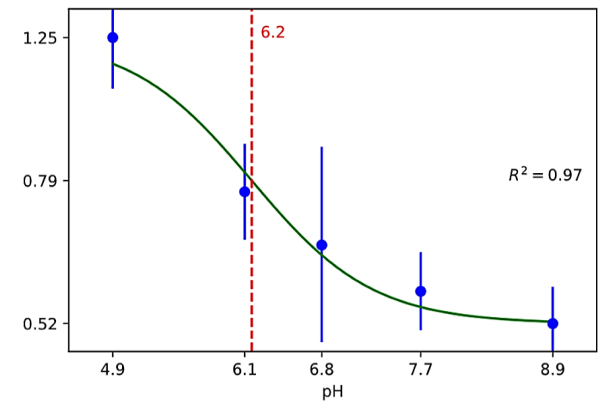

Alpha-2-antiplasmin (SERPINF2)

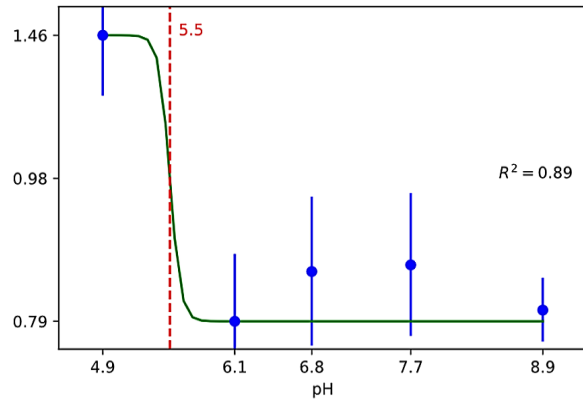

Talin-1 (TLN1)

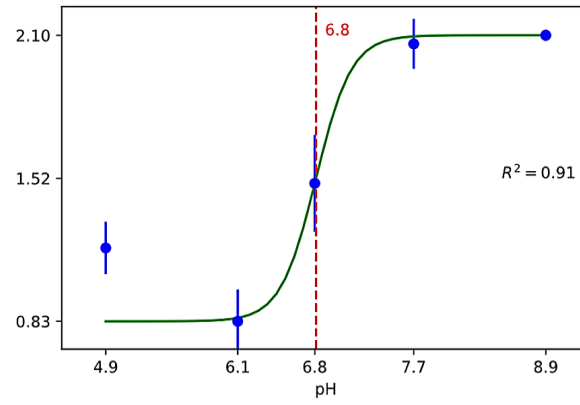

Tubulin beta chain (TUBB)

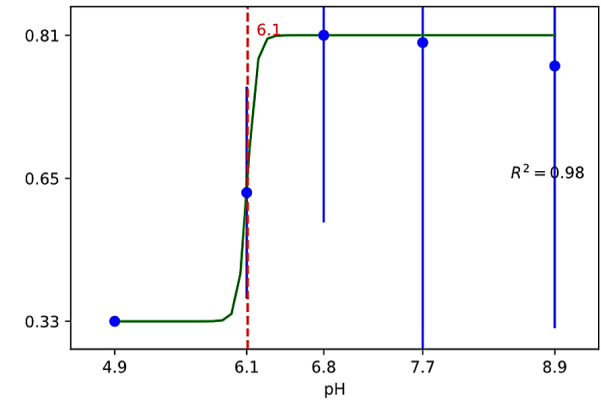

Heparin cofactor 2 (SERPIND1)

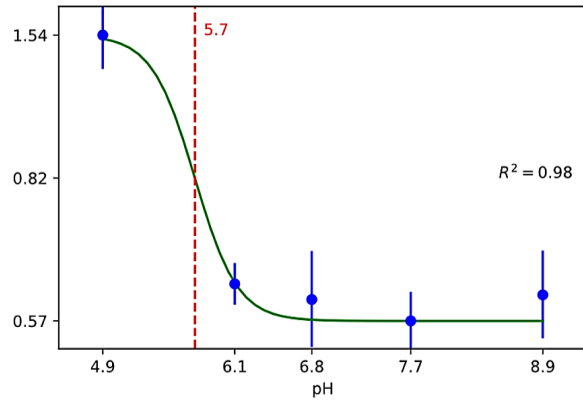

Serotransferrin (TF)

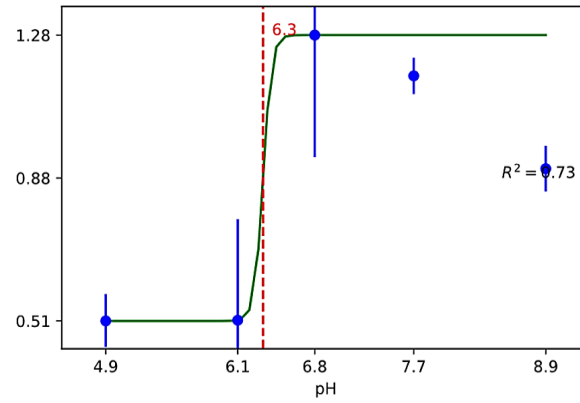

Transthyretin (TTR)

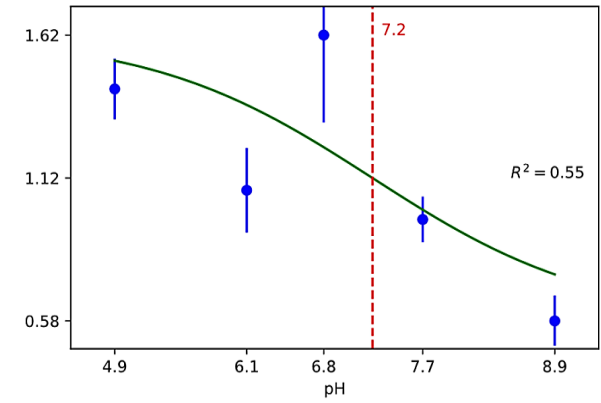

Protein Z-dependent protease inhibitor (SERPINA10)

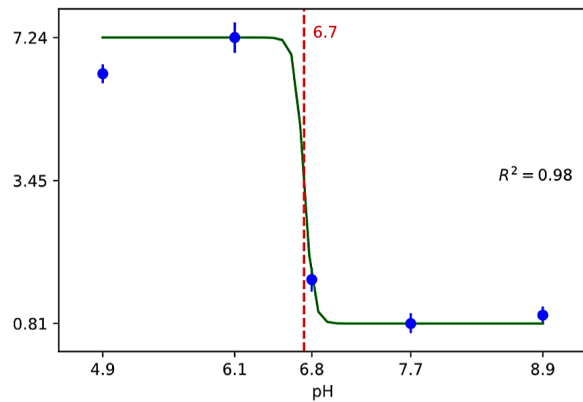

Plasma protease C1 inhibitor (SERPING1)

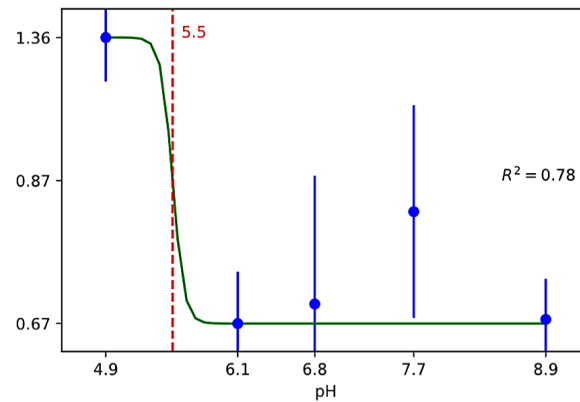

Tropomyosin alpha-4 chain (TPM4)

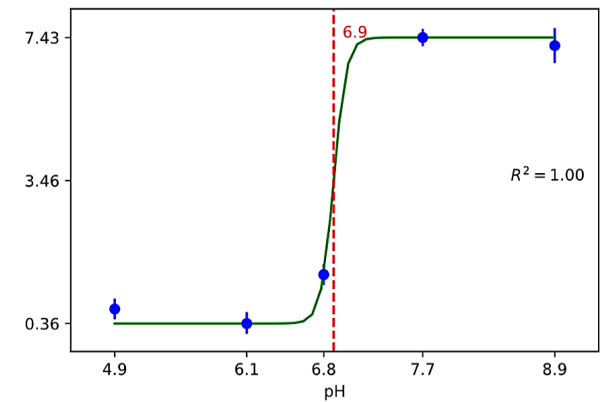

Vitronectin (VTN)

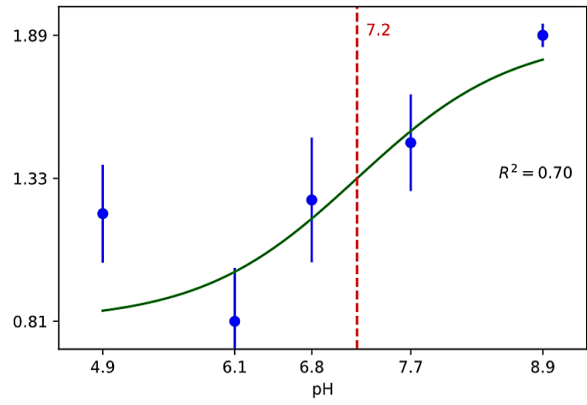

Vinculin (VCL)

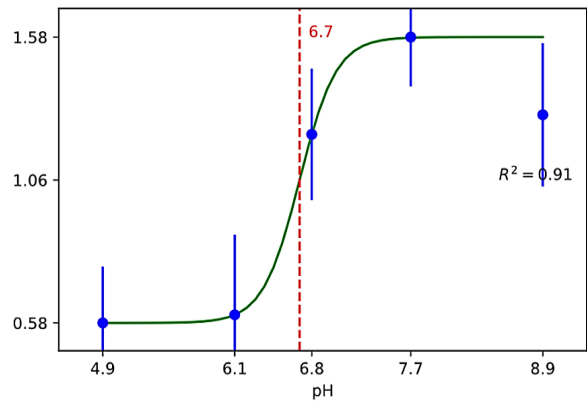

WD repeat-containing protein 1 (WDR1)

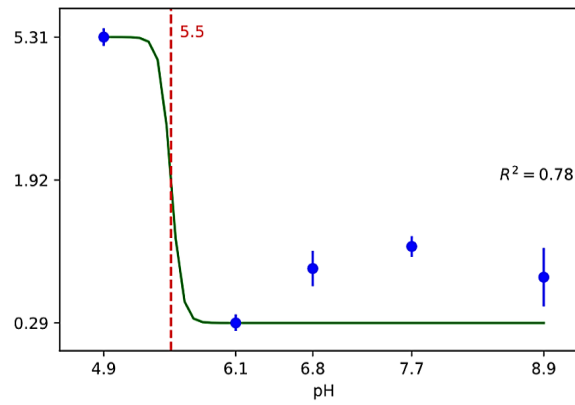

Tubulin beta-1 chain (TUBB1)

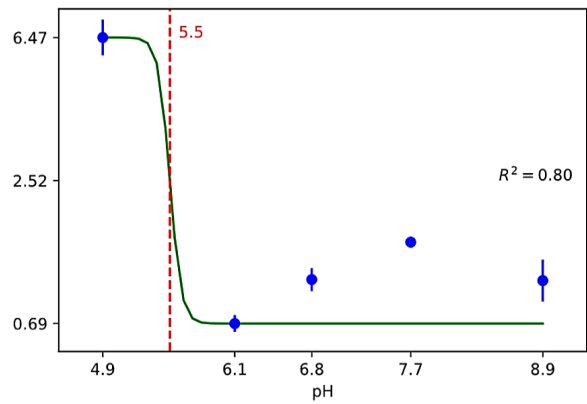

von Willebrand factor (VWF)

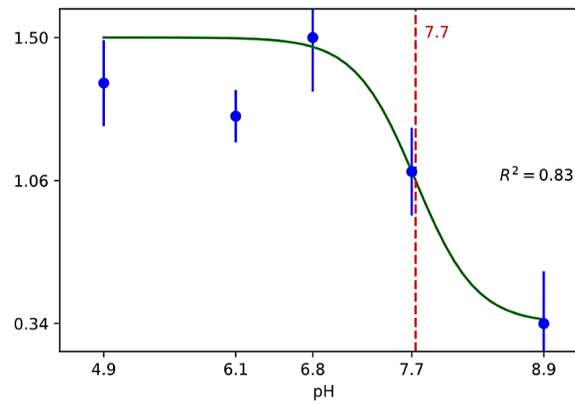

**Differentially abundant proteins in temperature experiment**

Afamin (AFM)

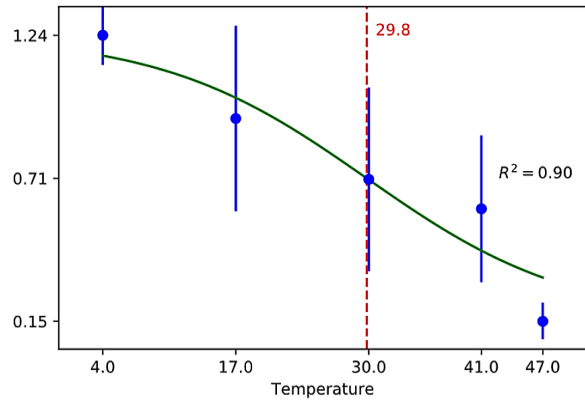

Apolipoprotein A-I (APOA1)

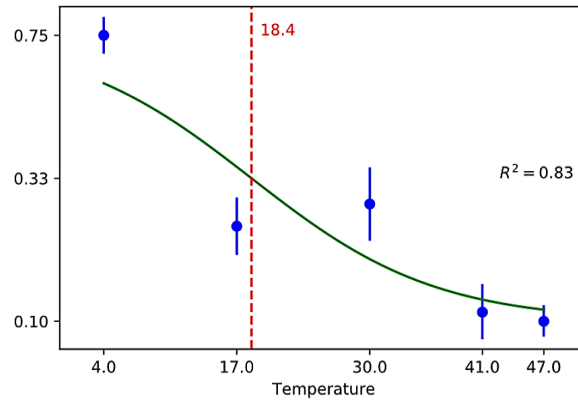

Sarcoplasmic/endoplasmic reticulum calcium ATPase 3 (ATP2A3)

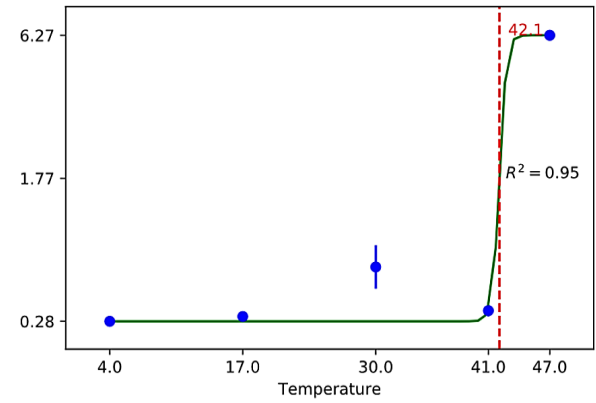

Alpha-actinin-4 (ACTN4)

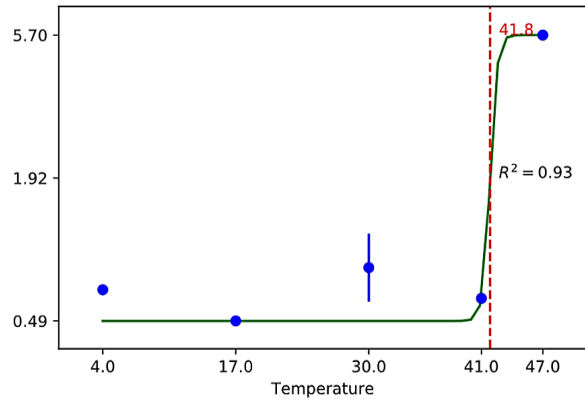

Protein AMBP (AMBP)

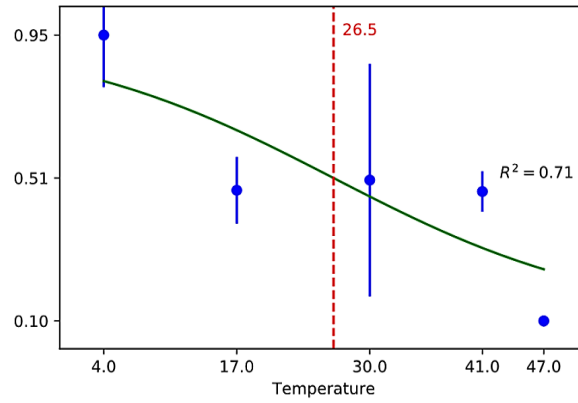

Apolipoprotein C-IV (APOC4)

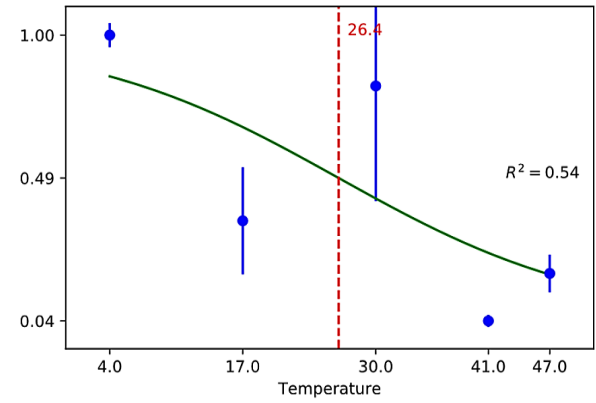

Vitronectin (VTN)

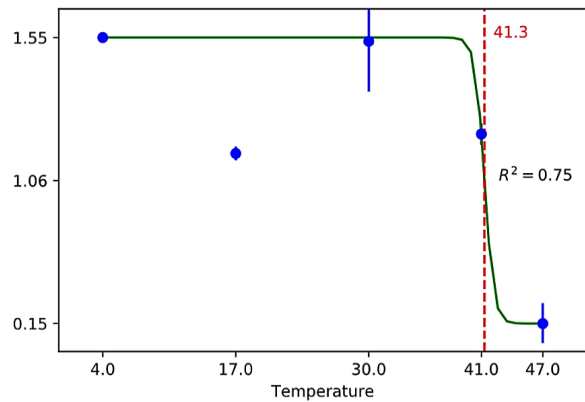

Serum albumin (ALB)

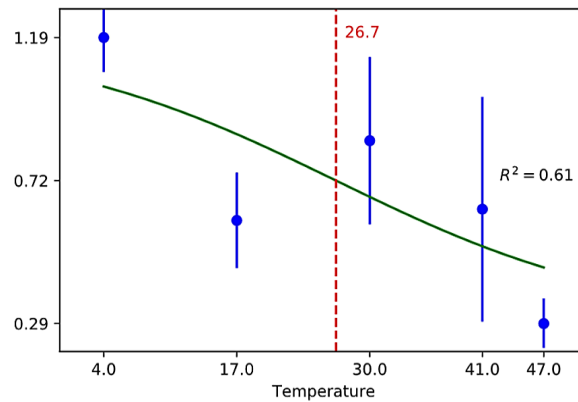

Apolipoprotein A-II (APOA2)

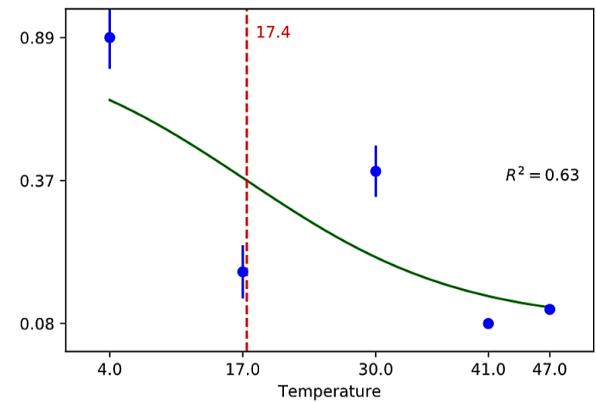

Complement C1s subcomponent (C1S)

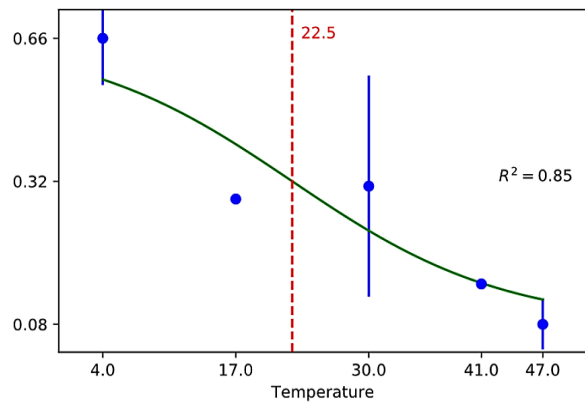

C4b-binding protein beta chain (C4BPB)

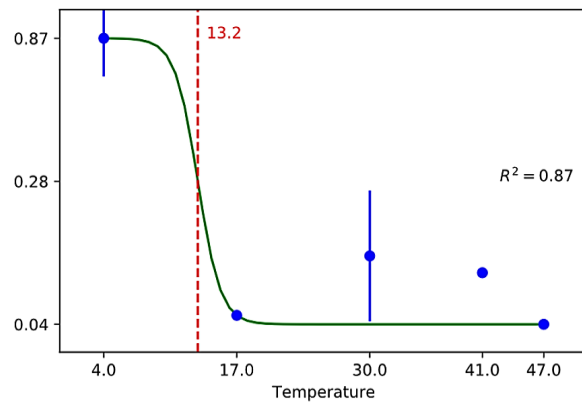

Complement component C8 gamma chain (C8G)

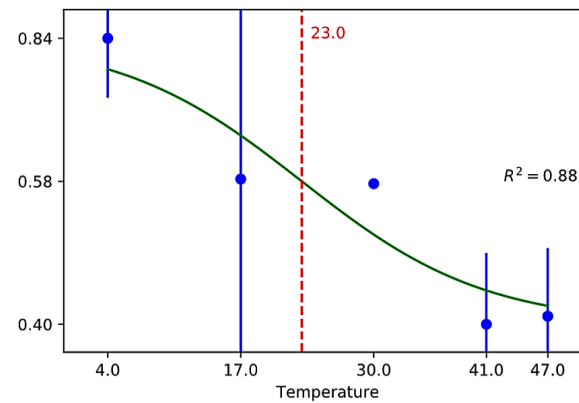

Complement C1r subcomponent (C1R)

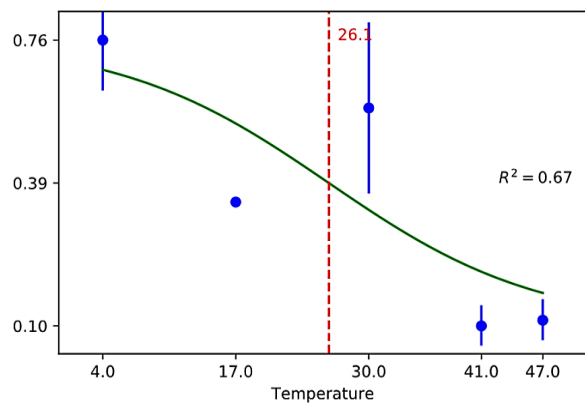

C4b-binding protein alpha chain (C4BPA)

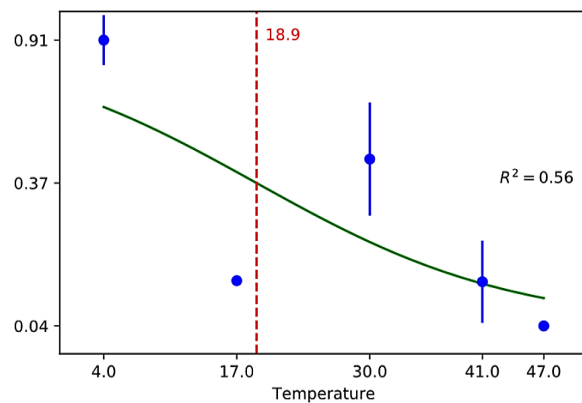

Complement component C8 alpha chain (C8A)

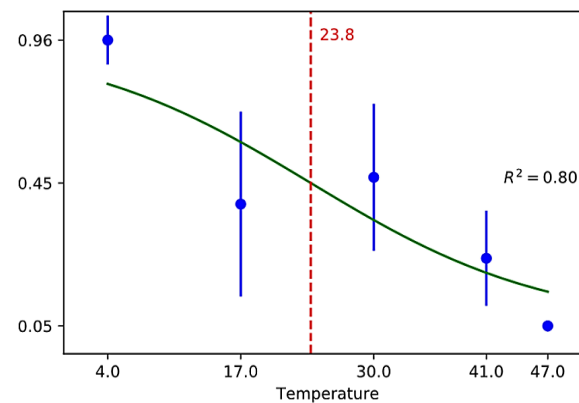

ATP synthase subunit alpha, mitochondrial (ATP5A1)

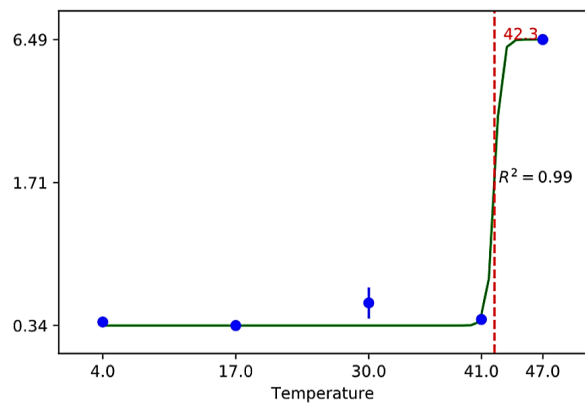

Complement C3 (C3)

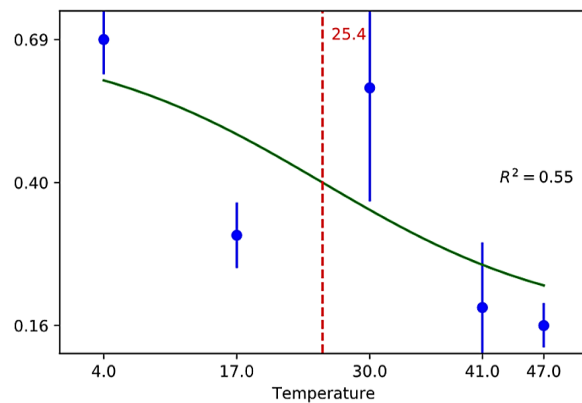

Complement C5 (C5)

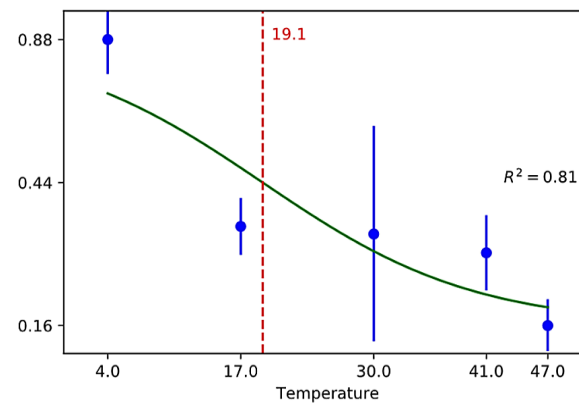

Caveolae-associated protein 2 (CAVIN2)

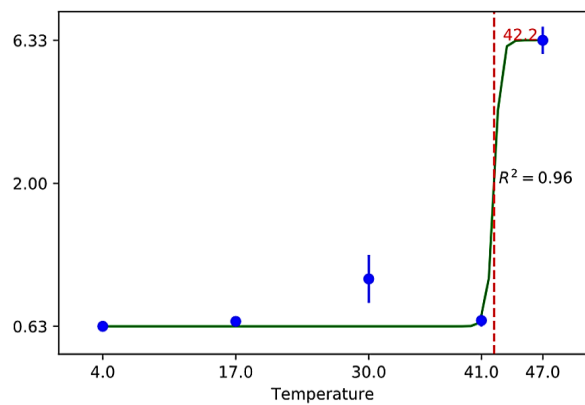

Chloride intracellular channel protein 1 (CLIC1)

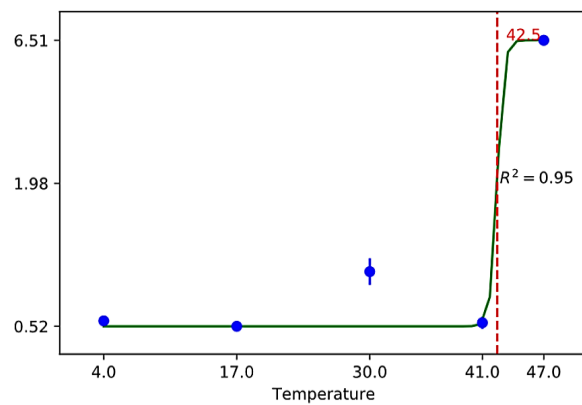

Carboxypeptidase N catalytic chain (CPN1)

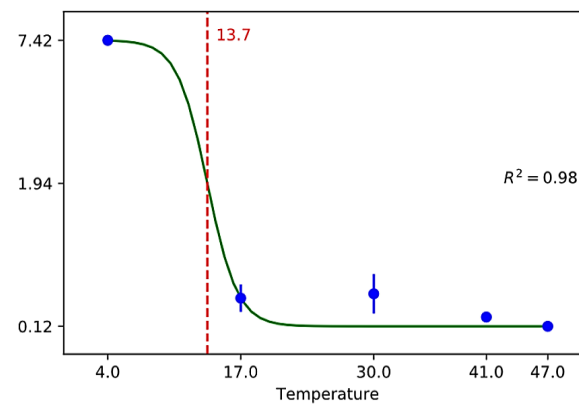

Calnexin (CANX)

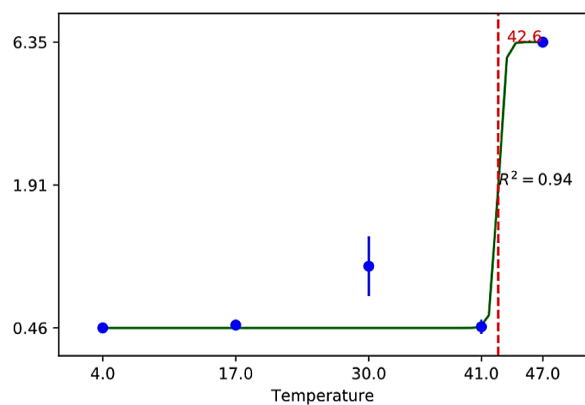

Complement factor H (CFH)

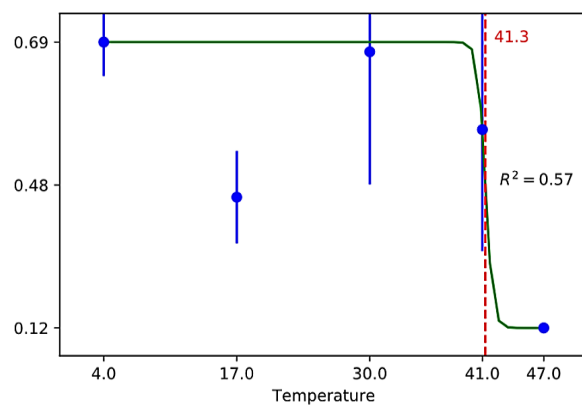

Collectin-11 (COLEC11)

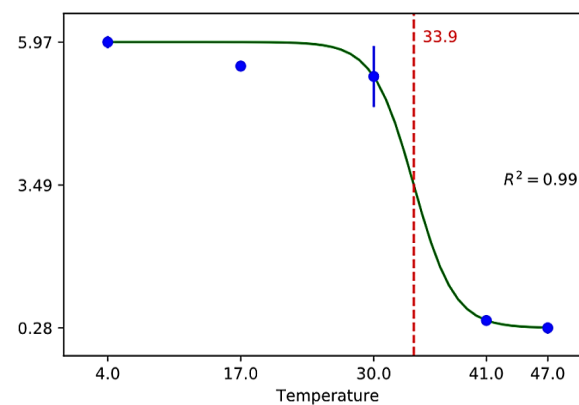

Complement component C9 (C9)

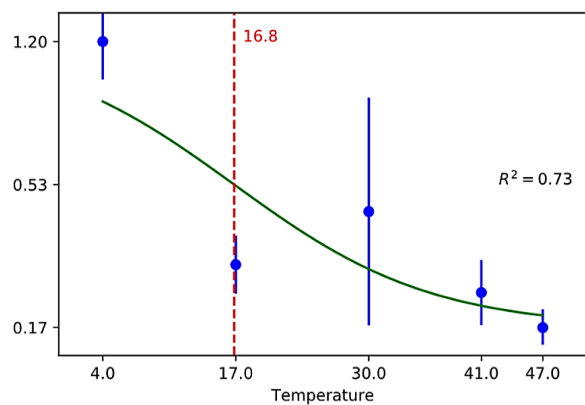

Complement factor D (CFD)

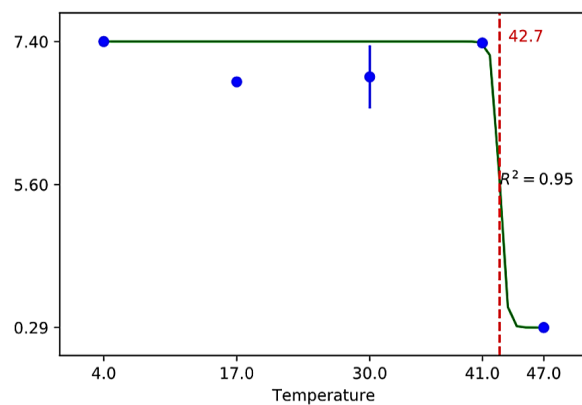

Clathrin heavy chain 1 (CLTC)

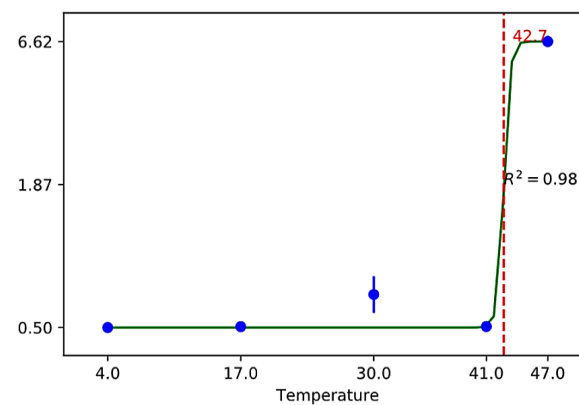

Coagulation factor XI (F11)

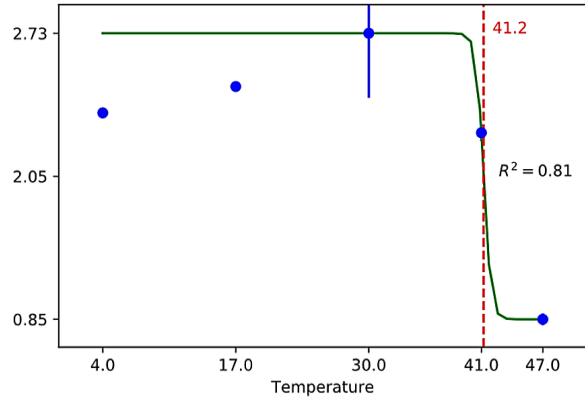

Platelet glycoprotein Ib alpha chain (GP1BA)

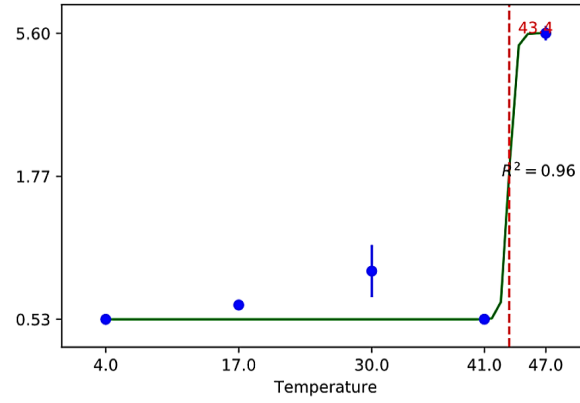

Histidine-rich glycoprotein (HRG)

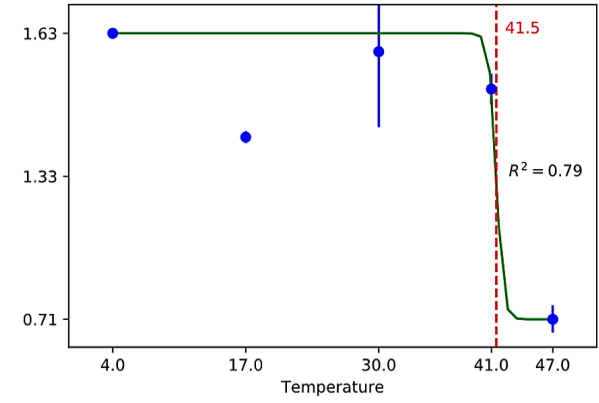

Coagulation factor IX (F9)

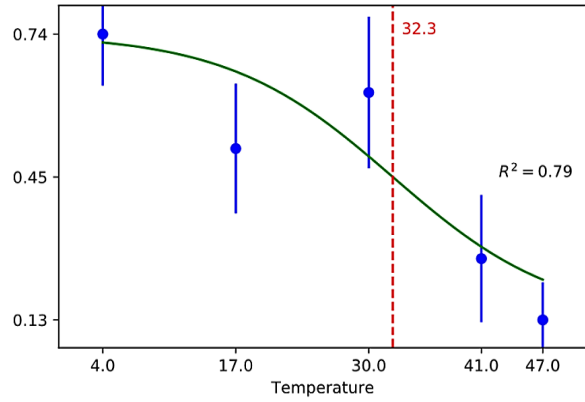

Ficolin-3 (FCN3)

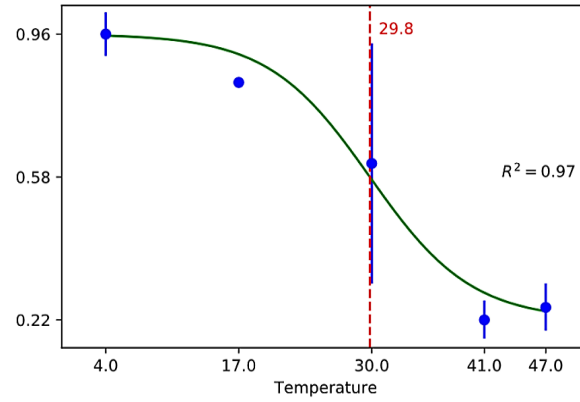

Glutathione peroxidase 3 (GPX3)

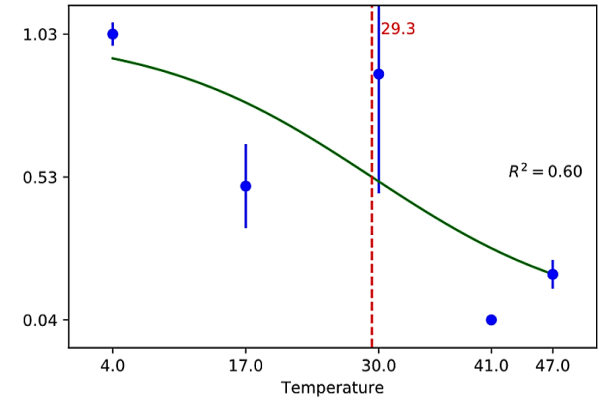

Coagulation factor V (F5)

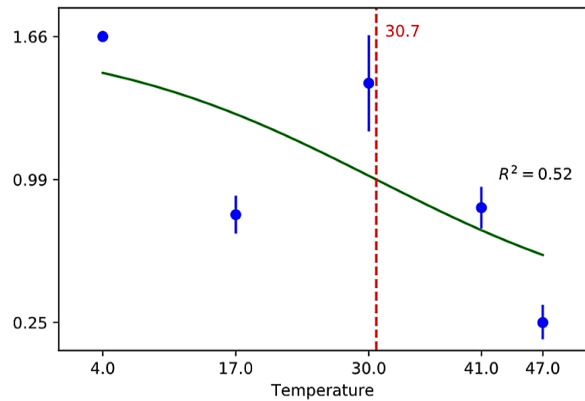

Coagulation factor XIII A chain (F13A1)

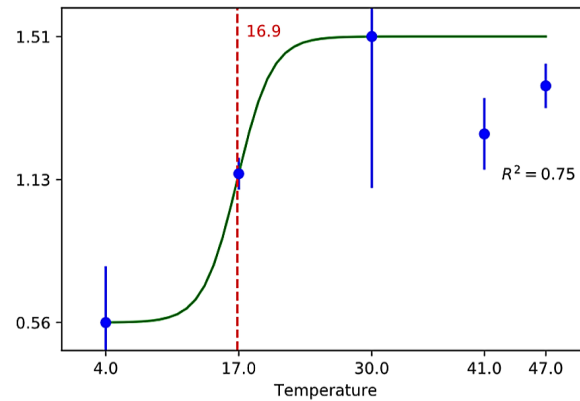

Phosphatidylinositol-glycan-specific phospholipase D (GPLD1)

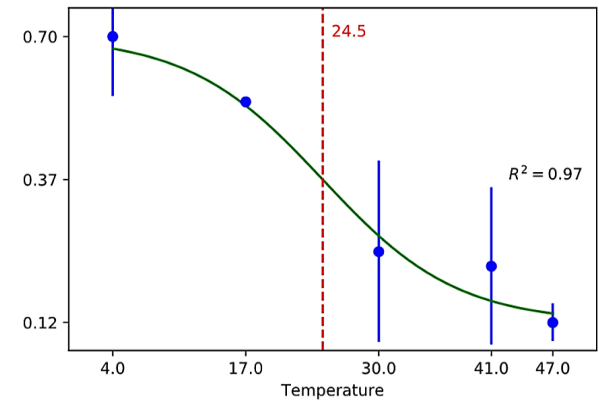



Isocitrate dehydrogenase [NADP], mitochondrial (IDH2)

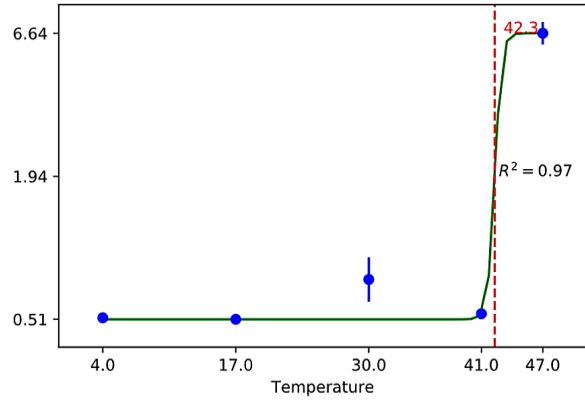

Insulin-like growth factor-binding protein 5 (IGFBP5)

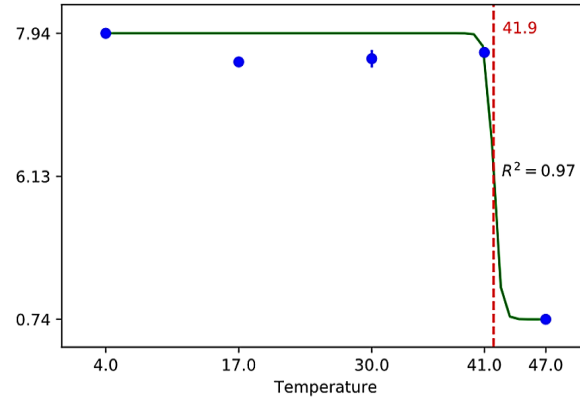

Inter-alpha-trypsin inhibitor heavy chain H1 (ITI1H1)

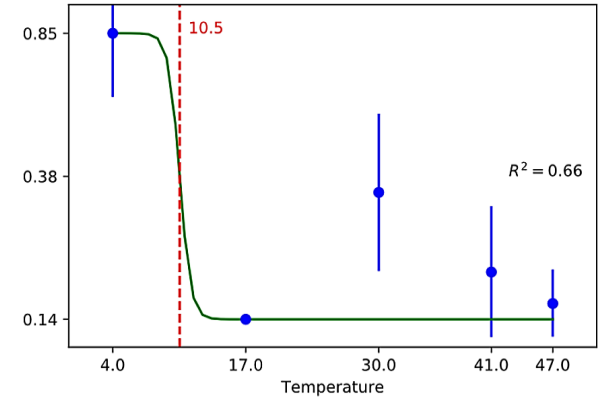

60 kDa heat shock protein, mitochondrial (HSPD1)

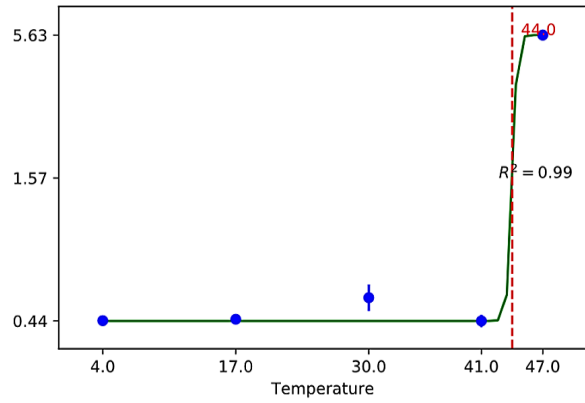

I-like growth factor-binding protein complex acid labile subunit (IGFBP3)

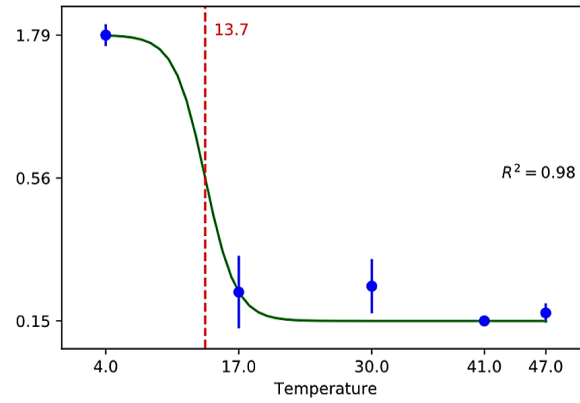

Integrin beta-1 (ITGB1)

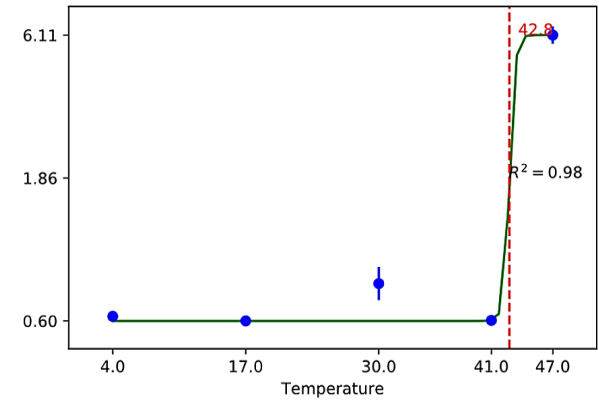

78 kDa glucose-regulated protein (HSPA5)

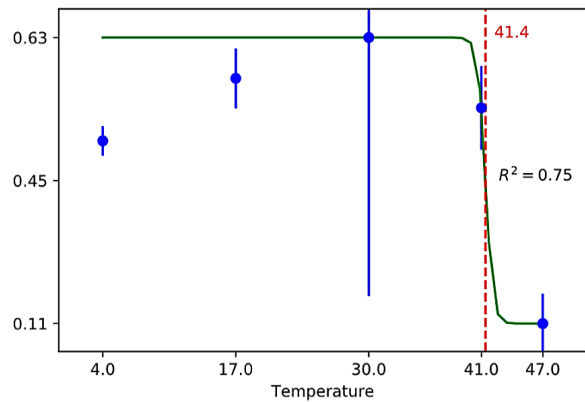

Insulin-like growth factor II (IGF2)

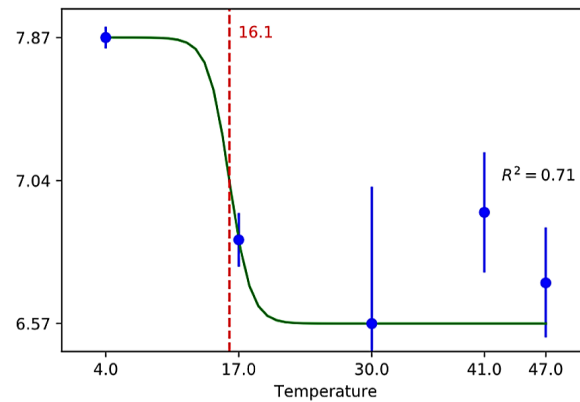

Immunoglobulin heavy constant gamma 1 (IGHG1)

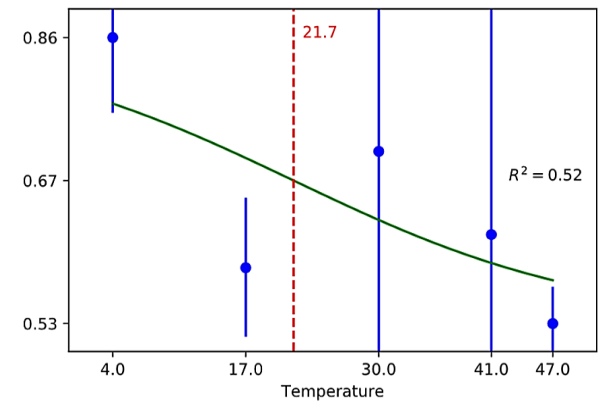

Kininogen-1 (KNG1)

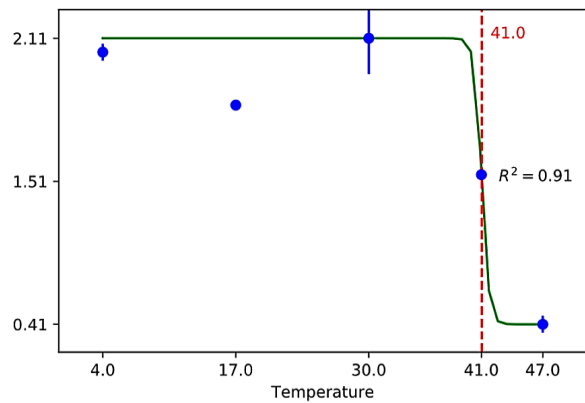

Myosin light polypeptide 6 (MYL6)

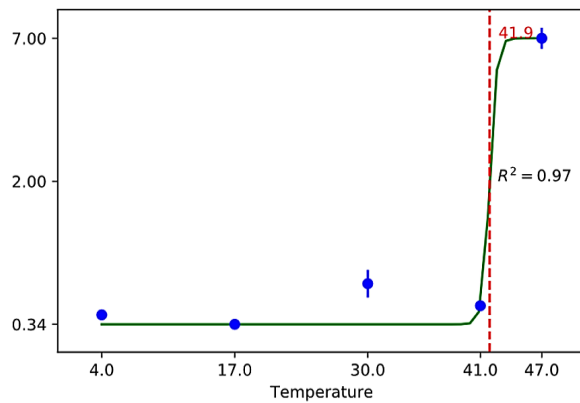

Profilin-1 (PFN1)

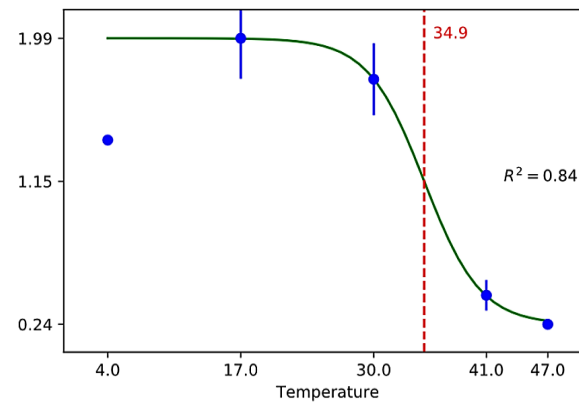

Plasma kallikrein (KLKB1)

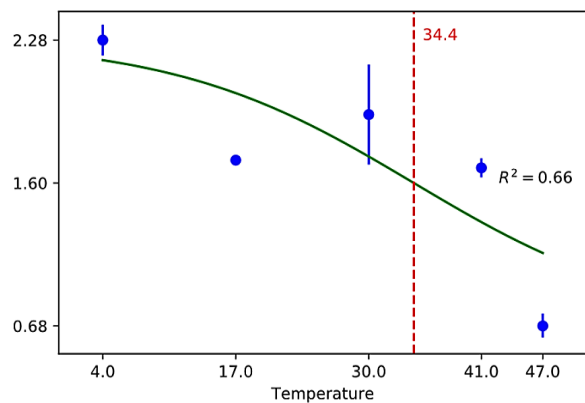

Lactotransferrin (LTF)

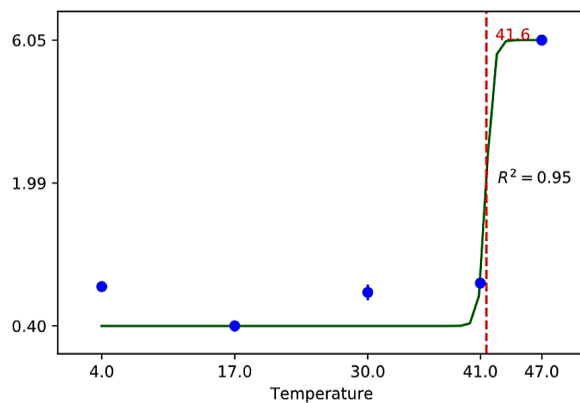

Protein disulfide-isomerase (P4HB)

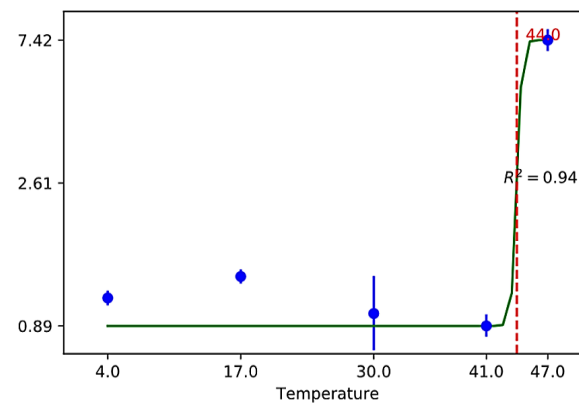

Inter-alpha-trypsin inhibitor heavy chain H4 (ITI4)

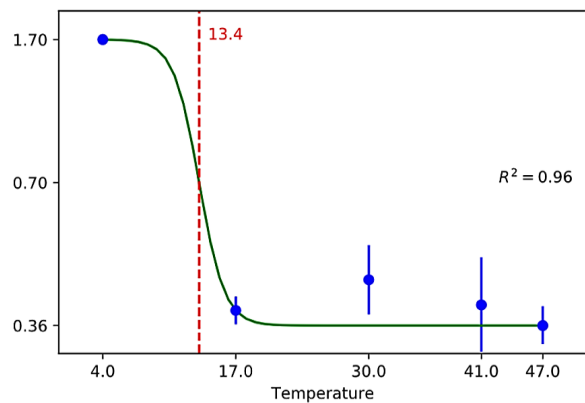

Leucine-rich alpha-2-glycoprotein (LRG1)

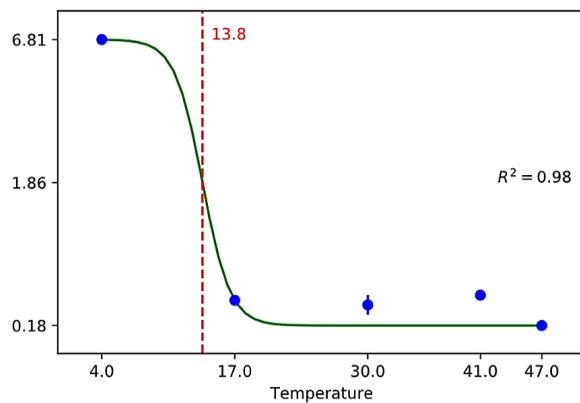

Nucleoside diphosphate kinase A (NME1)

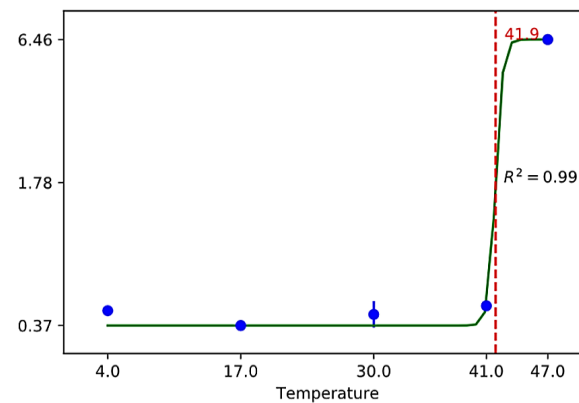

Proteoglycan 4 (PRG4)

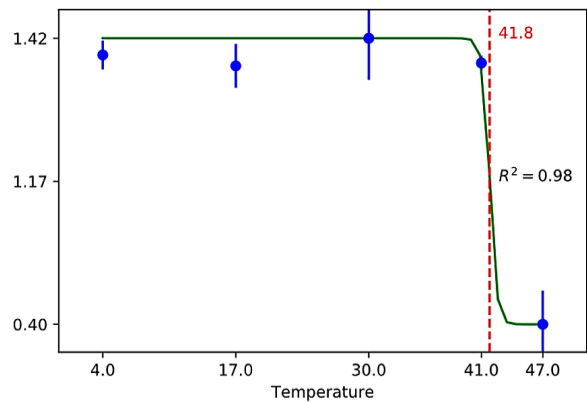

Retinol-binding protein 4 (RBP4)

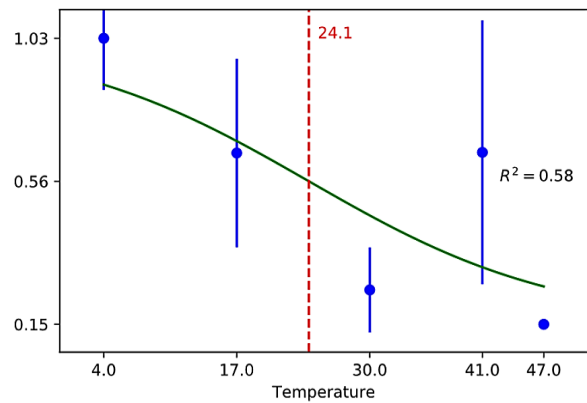

Alpha-2-antiplasmin (SERPINF2)

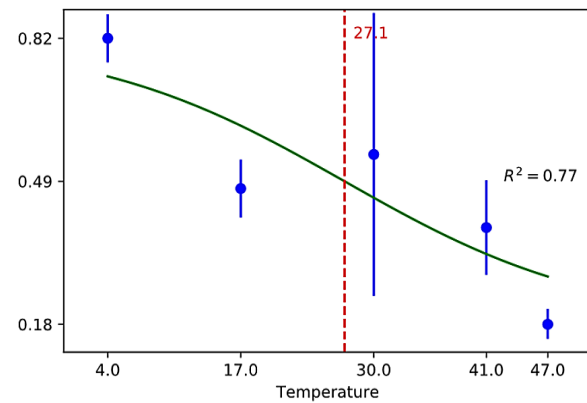

Plasminogen (PLG)

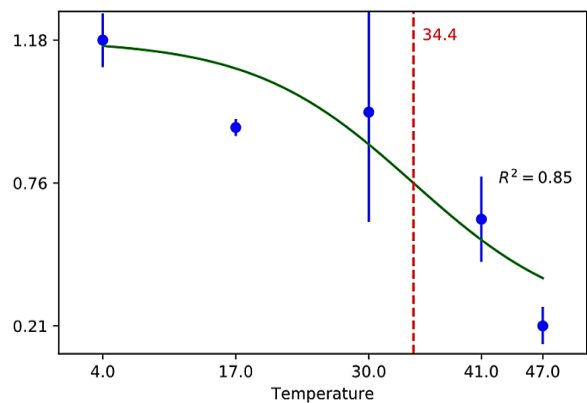

Ras-related protein Rap-1b (RAP1B)

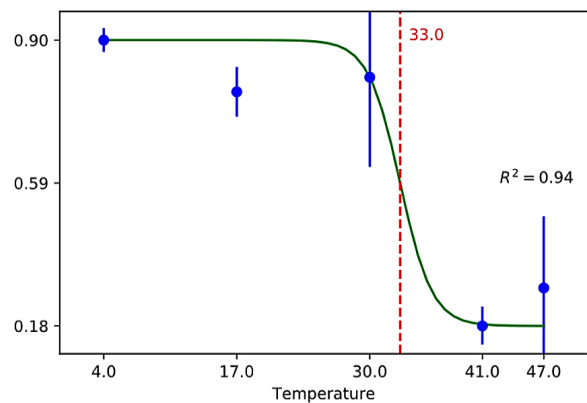

Serum amyloid A-4 protein (SAA4)

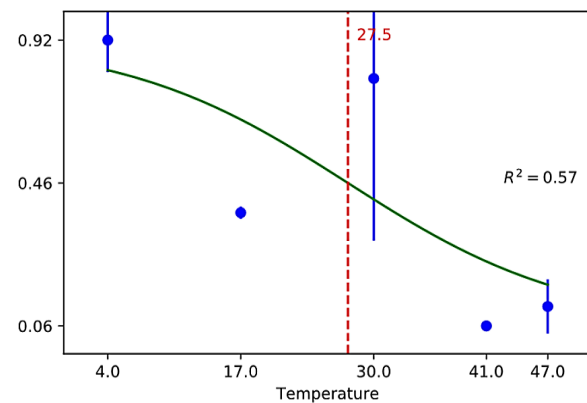

N-acetylmuramoyl-L-alanine amidase (PGLYRP2)

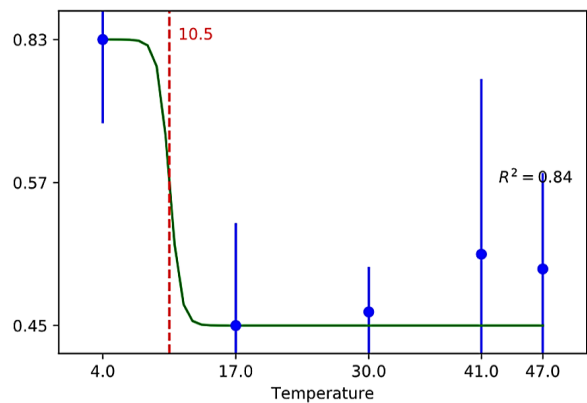

Vitamin K-dependent protein S (PROS1)

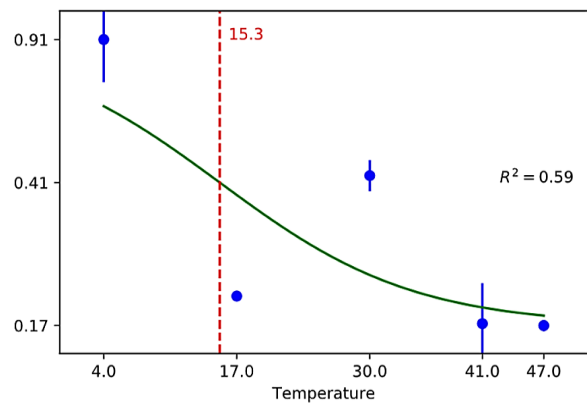

Ribonuclease 4 (RNASE4)

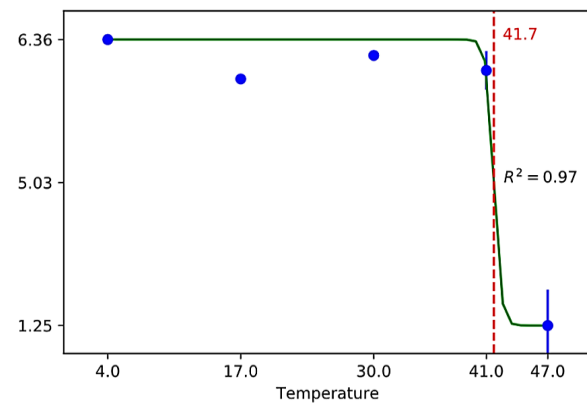

Tubulin beta chain (TUBB)

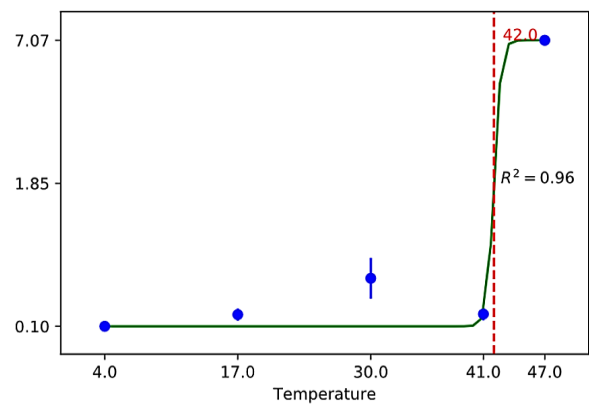

Tropomyosin alpha-4 chain (TPM4)

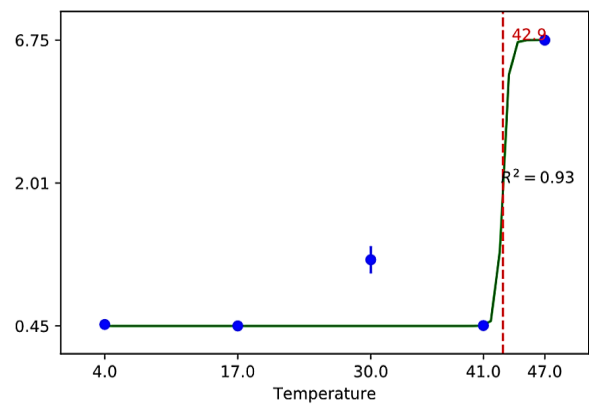

Serotransferrin (TF)

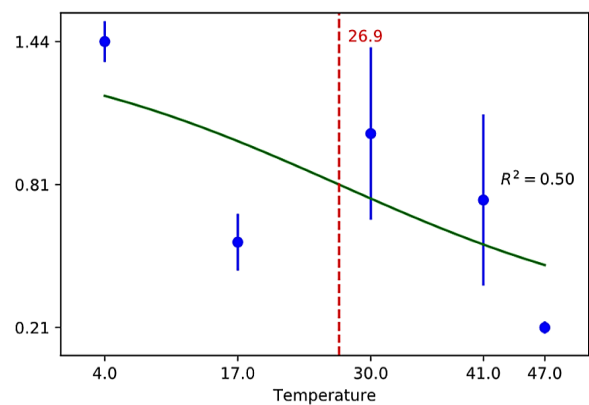

## **Results of lessening analysis**

|            | Difference(pH) | Lessening(pH) | p-value(pH) | FDR(pH)   | Difference(Temp) | Lessening(Temp) | p-value(Temp) | FDR(Temp) | Class                       | Description                                                                   |
|------------|----------------|---------------|-------------|-----------|------------------|-----------------|---------------|-----------|-----------------------------|-------------------------------------------------------------------------------|
| ANDN920101 | 0.0851         | 1.0059        | 7.749E-01   | 8.414E-01 | 0.1143           | 1.0669          | 2.608E-01     | 3.618E-01 | Physicochemical properties  | alpha-CH chemical shifts (Andersen et al., 1992)                              |
| ARGP820101 | 0.0029         | 0.7459        | 1.466E-03   | 6.760E-03 | 0.0118           | 0.7065          | 1.049E-04     | 1.098E-03 | Hydrophobicity              | Hydrophobicity index (Argos et al., 1982)                                     |
| ARGP820102 | -0.0324        | 0.9570        | 7.526E-01   | 8.255E-01 | -0.0634          | 0.9077          | 3.353E-01     | 4.354E-01 | Hydrophobicity              | Signal sequence helical potential (Argos et al., 1982)                        |
| ARGP820103 | -0.0281        | 1.0370        | 5.354E-01   | 6.318E-01 | -0.0724          | 0.9953          | 9.056E-01     | 9.261E-01 | Hydrophobicity              | Membrane-buried preference parameters (Argos et al., 1982)                    |
| BEGF750101 | 0.0084         | 1.3538        | 1.750E-06   | 1.190E-04 | -0.0710          | 1.2759          | 6.961E-05     | 8.819E-04 | Alpha and turn propensities | Conformational parameter of inner helix (Beghin-Dirkx, 1975)                  |
| BEGF750102 | 0.0230         | 0.8138        | 1.674E-02   | 3.976E-02 | -0.0039          | 0.8151          | 1.418E-02     | 3.655E-02 | Hydrophobicity              | Conformational parameter of beta-structure (Beghin-Dirkx, 1975)               |
| BEGF750103 | 0.0125         | 1.2073        | 1.904E-03   | 7.788E-03 | 0.1185           | 1.1574          | 1.137E-02     | 3.072E-02 | Alpha and turn propensities | Conformational parameter of beta-turn (Beghin-Dirkx, 1975)                    |
| BHAR880101 | -0.0973        | 0.7407        | 1.852E-03   | 7.691E-03 | -0.0577          | 0.7579          | 2.721E-03     | 1.007E-02 | Hydrophobicity              | Average flexibility indices (Bhaskaran-Ponnuswamy, 1988)                      |
| BIGC670101 | -0.0143        | 0.8438        | 2.710E-02   | 5.826E-02 | -0.0185          | 0.8550          | 3.313E-02     | 7.024E-02 | Physicochemical properties  | Residue volume (Bigelow, 1967)                                                |
| BIOV880101 | 0.0590         | 0.7139        | 3.814E-04   | 2.594E-03 | 0.0576           | 0.7000          | 9.036E-05     | 9.988E-04 | Hydrophobicity              | Information value for accessibility; average fraction 35% (Biou et al., 1988) |
| BIOV880102 | 0.0475         | 0.6721        | 1.430E-04   | 1.587E-03 | 0.0367           | 0.6526          | 2.204E-05     | 4.695E-04 | Hydrophobicity              | Information value for accessibility; average fraction 23% (Biou et al., 1988) |
| BROC820101 | -0.0162        | 1.1275        | 6.048E-02   | 1.058E-01 | -0.0626          | 1.0925          | 1.451E-01     | 2.267E-01 | Hydrophobicity              | Retention coefficient in TFA (Browne et al., 1982)                            |
| BROC820102 | -0.0576        | 1.1287        | 5.689E-02   | 1.008E-01 | -0.1004          | 1.1458          | 2.520E-02     | 5.760E-02 | Hydrophobicity              | Retention coefficient in HFBA (Browne et al., 1982)                           |
| BULH740101 | -0.0225        | 0.8825        | 1.983E-01   | 2.838E-01 | -0.0147          | 0.8486          | 6.977E-02     | 1.278E-01 | Hydrophobicity              | Transfer free energy to surface (Bull-Breese, 1974)                           |
| BULH740102 | -0.0573        | 0.9580        | 6.584E-01   | 7.446E-01 | -0.0735          | 0.9714          | 7.990E-01     | 8.520E-01 | Physicochemical properties  | Apparent partial specific volume (Bull-Breese, 1974)                          |
| BUNA790101 | 0.0548         | 0.8940        | 2.560E-01   | 3.544E-01 | 0.0623           | 0.8798          | 1.554E-01     | 2.374E-01 | Alpha and turn propensities | alpha-NH chemical shifts (Bundi-Wuthrich, 1979)                               |
| BUNA790102 | 0.1160         | 0.9051        | 2.659E-01   | 3.634E-01 | 0.1096           | 1.0315          | 5.539E-01     | 6.439E-01 | Physicochemical properties  | alpha-CH chemical shifts (Bundi-Wuthrich, 1979)                               |
| BUNA790103 | 0.0508         | 0.8536        | 1.177E-01   | 1.878E-01 | 0.0674           | 0.8426          | 7.311E-02     | 1.321E-01 | Alpha and turn propensities | Spin-spin coupling constants 3JHalp-NH (Bundi-Wuthrich, 1979)                 |
| BURA740101 | -0.0392        | 1.3145        | 1.827E-05   | 4.496E-04 | -0.0717          | 1.1398          | 2.966E-02     | 6.560E-02 | Alpha and turn propensities | Normalized frequency of alpha-helix (Burgess et al., 1974)                    |
| BURA740102 | 0.0838         | 0.9878        | 9.431E-01   | 9.629E-01 | 0.0757           | 0.9516          | 6.513E-01     | 7.245E-01 | Beta propensity             | Normalized frequency of extended structure (Burgess et al., 1974)             |
| CHAM810101 | -0.0013        | 0.9187        | 4.116E-01   | 5.101E-01 | -0.0502          | 0.8823          | 1.940E-01     | 2.800E-01 | Other properties            | Steric parameter (Charton, 1981)                                              |
| CHAM820101 | 0.0218         | 0.7695        | 6.014E-04   | 3.533E-03 | 0.0185           | 0.8583          | 2.673E-02     | 6.034E-02 | Physicochemical properties  | Polarizability parameter (Charton-Charton, 1982)                              |
| CHAM820102 | 0.1543         | 0.9102        | 3.777E-01   | 4.712E-01 | 0.1161           | 0.9077          | 3.454E-01     | 4.458E-01 | Hydrophobicity              | Free energy of solution in water, kcal/mole (Charton-Charton, 1982)           |
| CHAM830101 | -0.0203        | 1.1104        | 1.230E-01   | 1.939E-01 | 0.0604           | 1.0713          | 2.704E-01     | 3.704E-01 | Alpha and turn propensities | The Chou-Fasman parameter of the coil conformation (Charton-Charton, 1983)    |
| CHAM830102 | 0.1170         | 1.0303        | 4.542E-01   | 5.578E-01 | 0.1365           | 0.9939          | 8.832E-01     | 9.083E-01 | Alpha and turn propensities | A parameter defined from the residuals obtained from the best correlation of  |
| CHAM830103 | 0.0505         | 0.7753        | 1.989E-02   | 4.605E-02 | 0.0205           | 0.8936          | 2.776E-01     | 3.740E-01 | Physicochemical properties  | The number of atoms in the side chain labelled 1+1 (Charton-Charton, 1983)    |
| CHAM830104 | -0.0319        | 0.9482        | 5.701E-01   | 6.598E-01 | -0.0720          | 0.9685          | 7.544E-01     | 8.192E-01 | Other properties            | The number of atoms in the side chain labelled 2+1 (Charton-Charton, 1983)    |
| CHAM830105 | -0.0141        | 0.7812        | 3.486E-03   | 1.163E-02 | -0.0082          | 0.8537          | 4.594E-02     | 9.087E-02 | Physicochemical properties  | The number of atoms in the side chain labelled 3+1 (Charton-Charton, 1983)    |
| CHAM830106 | -0.0173        | 0.8416        | 5.646E-02   | 1.004E-01 | 0.0000           | 0.8337          | 3.653E-02     | 7.556E-02 | Physicochemical properties  | The number of bonds in the longest chain (Charton-Charton, 1983)              |
| CHAM830107 | 0.0873         | 1.0240        | 5.979E-01   | 6.892E-01 | 0.0886           | 1.0019          | 7.995E-01     | 8.520E-01 | Beta propensity             | A parameter of charge transfer capability (Charton-Charton, 1983)             |
| CHAM830108 | 0.0889         | 0.9726        | 7.804E-01   | 8.435E-01 | 0.1130           | 0.9978          | 9.247E-01     | 9.368E-01 | Composition                 | A parameter of charge transfer donor capability (Charton-Charton, 1983)       |
| CHOC750101 | -0.0154        | 0.8483        | 3.862E-02   | 7.613E-02 | -0.0159          | 0.8837          | 9.730E-02     | 1.659E-01 | Physicochemical properties  | Average volume of buried residue (Chothia, 1975)                              |
| CHOC760101 | -0.0178        | 0.8044        | 7.883E-03   | 2.121E-02 | -0.0144          | 0.8663          | 5.814E-02     | 1.098E-01 | Physicochemical properties  | Residue accessible surface area in tripeptide (Chothia, 1976)                 |
| CHOC760102 | -0.0440        | 0.7238        | 2.182E-03   | 8.603E-03 | -0.0109          | 0.7036          | 5.747E-04     | 3.361E-03 | Hydrophobicity              | Residue accessible surface area in folded protein (Chothia, 1976)             |
| CHOC760103 | 0.0657         | 0.7908        | 7.553E-03   | 2.086E-02 | 0.0281           | 0.8053          | 8.648E-03     | 2.502E-02 | Hydrophobicity              | Proportion of residues 95% buried (Chothia, 1976)                             |
| CHOC760104 | 0.0548         | 0.8468        | 4.448E-02   | 8.581E-02 | 0.0300           | 0.8103          | 9.709E-03     | 2.716E-02 | Hydrophobicity              | Proportion of residues 100% buried (Chothia, 1976)                            |
| CHOP780101 | -0.0040        | 1.0471        | 3.630E-01   | 4.571E-01 | 0.0766           | 1.0267          | 5.131E-01     | 6.094E-01 | Alpha and turn propensities | Normalized frequency of beta-turn (Chou-Fasman, 1978a)                        |
| CHOP780201 | -0.0640        | 1.3663        | 3.461E-06   | 1.883E-04 | -0.1146          | 1.2092          | 3.836E-03     | 1.321E-02 | Alpha and turn propensities | Normalized frequency of alpha-helix (Chou-Fasman, 1978b)                      |
| CHOP780202 | 0.0568         | 0.7281        | 1.736E-04   | 1.760E-03 | 0.0486           | 0.7281          | 7.709E-05     | 9.116E-04 | Beta propensity             | Normalized frequency of beta-sheet (Chou-Fasman, 1978b)                       |
| CHOP780203 | -0.0316        | 0.9666        | 8.458E-01   | 8.935E-01 | 0.0393           | 1.0132          | 7.093E-01     | 7.779E-01 | Alpha and turn propensities | Normalized frequency of beta-turn (Chou-Fasman, 1978b)                        |
| CHOP780204 | 0.0080         | 0.8882        | 1.980E-01   | 2.838E-01 | -0.0098          | 0.8194          | 3.295E-02     | 7.024E-02 | Hydrophobicity              | Normalized frequency of N-terminal helix (Chou-Fasman, 1978b)                 |
| CHOP780205 | -0.0590        | 0.9694        | 8.753E-01   | 9.037E-01 | -0.0574          | 0.9251          | 4.676E-01     | 5.628E-01 | Alpha and turn propensities | Normalized frequency of C-terminal helix (Chou-Fasman, 1978b)                 |
| CHOP780206 | 0.0656         | 0.9334        | 5.038E-01   | 6.034E-01 | 0.0641           | 0.9979          | 8.365E-01     | 8.751E-01 | Other properties            | Normalized frequency of N-terminal non helical region (Chou-Fasman, 1978b)    |
| CHOP780207 | -0.0250        | 1.0821        | 2.039E-01   | 2.903E-01 | 0.0580           | 1.0613          | 2.812E-01     | 3.758E-01 | Alpha and turn propensities | Normalized frequency of C-terminal non helical region (Chou-Fasman, 1978b)    |
| CHOP780208 | -0.0135        | 0.7785        | 7.948E-03   | 2.121E-02 | -0.0187          | 0.7804          | 4.922E-03     | 1.573E-02 | Beta propensity             | Normalized frequency of N-terminal beta-sheet (Chou-Fasman, 1978b)            |
| CHOP780209 | 0.0819         | 0.7365        | 7.285E-04   | 4.003E-03 | 0.0899           | 0.7496          | 7.400E-04     | 3.798E-03 | Beta propensity             | Normalized frequency of C-terminal beta-sheet (Chou-Fasman, 1978b)            |
| CHOP780210 | -0.0434        | 1.1381        | 2.621E-02   | 5.681E-02 | 0.0593           | 1.0655          | 2.161E-01     | 3.022E-01 | Alpha and turn propensities | Normalized frequency of N-terminal non beta region (Chou-Fasman, 1978b)       |
| CHOP780211 | -0.0354        | 0.9443        | 5.058E-01   | 6.034E-01 | -0.0049          | 0.9341          | 3.906E-01     | 4.919E-01 | Alpha and turn propensities | Normalized frequency of C-terminal non beta region (Chou-Fasman, 1978b)       |
| CHOP780212 | 0.1135         | 1.1781        | 4.609E-03   | 1.449E-02 | 0.1548           | 1.1305          | 2.009E-02     | 4.772E-02 | Alpha and turn propensities | Frequency of the 1st residue in turn (Chou-Fasman, 1978b)                     |
| CHOP780213 | -0.0772        | 0.8147        | 6.883E-02   | 1.178E-01 | -0.0558          | 0.7975          | 3.465E-02     | 7.306E-02 | Alpha and turn propensities | Frequency of the 2nd residue in turn (Chou-Fasman, 1978b)                     |
| CHOP780214 | 0.0983         | 1.0913        | 1.463E-01   | 2.242E-01 | 0.1443           | 1.1475          | 2.079E-02     | 4.892E-02 | Other properties            | Frequency of the 3rd residue in turn (Chou-Fasman, 1978b)                     |
| CHOP780215 | 0.0665         | 1.2936        | 1.529E-04   | 1.664E-03 | 0.1453           | 1.2624          | 3.102E-04     | 2.150E-03 | Alpha and turn propensities | Frequency of the 4th residue in turn (Chou-Fasman, 1978b)                     |

|            |         |        |           |           |         |        |           |           |                             |                                                                                                       |
|------------|---------|--------|-----------|-----------|---------|--------|-----------|-----------|-----------------------------|-------------------------------------------------------------------------------------------------------|
| CHOP780216 | -0.0298 | 0.9665 | 7.684E-01 | 8.377E-01 | 0.0335  | 0.9396 | 4.906E-01 | 5.866E-01 | Alpha and turn propensities | Normalized frequency of the 2nd and 3rd residues in turn (Chou-Fasman, 1978b)                         |
| CIDH920101 | 0.0709  | 0.7624 | 5.339E-03 | 1.614E-02 | 0.0518  | 0.7472 | 1.803E-03 | 7.212E-03 | Hydrophobicity              | Normalized hydrophobicity scales for alpha-proteins (Cid et al., 1992)                                |
| CIDH920102 | 0.0463  | 0.6879 | 1.981E-04 | 1.858E-03 | 0.0463  | 0.6588 | 2.216E-05 | 4.695E-04 | Hydrophobicity              | Normalized hydrophobicity scales for beta-proteins (Cid et al., 1992)                                 |
| CIDH920103 | -0.0022 | 0.6936 | 2.700E-05 | 5.650E-04 | -0.0029 | 0.6446 | 3.716E-07 | 2.527E-05 | Hydrophobicity              | Normalized hydrophobicity scales for alpha+beta-proteins (Cid et al., 1992)                           |
| CIDH920104 | 0.0489  | 0.6553 | 5.708E-06 | 2.588E-04 | 0.0597  | 0.5946 | 2.286E-08 | 4.146E-06 | Hydrophobicity              | Normalized hydrophobicity scales for alpha/beta-proteins (Cid et al., 1992)                           |
| CIDH920105 | 0.0155  | 0.6813 | 2.366E-05 | 5.149E-04 | 0.0400  | 0.6345 | 3.626E-07 | 2.527E-05 | Hydrophobicity              | Normalized average hydrophobicity scales (Cid et al., 1992)                                           |
| COHE430101 | -0.0794 | 1.0667 | 2.279E-01 | 3.187E-01 | -0.0865 | 1.0820 | 1.477E-01 | 2.289E-01 | Physicochemical properties  | Partial specific volume (Cohn-Edsall, 1943)                                                           |
| CRAJ730101 | -0.0293 | 1.1973 | 8.649E-03 | 2.273E-02 | -0.1072 | 1.1233 | 7.522E-02 | 1.351E-01 | Alpha and turn propensities | Normalized frequency of middle helix (Crawford et al., 1973)                                          |
| CRAJ730102 | 0.0146  | 0.7787 | 7.883E-03 | 2.121E-02 | 0.0102  | 0.8284 | 3.022E-02 | 6.656E-02 | Beta propensity             | Normalized frequency of beta-sheet (Crawford et al., 1973)                                            |
| CRAJ730103 | 0.0404  | 1.2403 | 1.167E-04 | 1.476E-03 | 0.0927  | 1.2034 | 5.804E-04 | 3.361E-03 | Alpha and turn propensities | Normalized frequency of turn (Crawford et al., 1973)                                                  |
| DAWD720101 | -0.0272 | 0.7592 | 1.151E-03 | 5.695E-03 | -0.0394 | 0.8861 | 1.264E-01 | 2.044E-01 | Physicochemical properties  | Size (Dawson, 1972)                                                                                   |
| DAYM780101 | -0.0905 | 1.0317 | 5.598E-01 | 6.507E-01 | -0.0902 | 1.0957 | 1.385E-01 | 2.196E-01 | Composition                 | Amino acid composition (Dayhoff et al., 1978a)                                                        |
| DAYM780201 | -0.0601 | 0.9443 | 5.463E-01 | 6.419E-01 | -0.1647 | 1.0308 | 5.048E-01 | 6.009E-01 | Physicochemical properties  | Relative mutability (Dayhoff et al., 1978b)                                                           |
| DESM900101 | 0.0638  | 0.7219 | 8.457E-04 | 4.555E-03 | 0.0470  | 0.7243 | 5.494E-04 | 3.284E-03 | Hydrophobicity              | Membrane preference for cytochrome b: MPH89 (Degli Esposti et al., 1990)                              |
| DESM900102 | 0.0463  | 0.7555 | 7.541E-03 | 2.086E-02 | 0.0330  | 0.7230 | 1.442E-03 | 6.227E-03 | Hydrophobicity              | Average membrane preference: AMP07 (Degli Esposti et al., 1990)                                       |
| EISD840101 | 0.0634  | 0.7744 | 1.351E-02 | 3.296E-02 | 0.0157  | 0.7749 | 8.863E-03 | 2.551E-02 | Hydrophobicity              | Consensus normalized hydrophobicity scale (Eisenberg, 1984)                                           |
| EISD860101 | 0.0585  | 0.8259 | 4.916E-02 | 9.230E-02 | 0.0057  | 0.7343 | 9.345E-04 | 4.459E-03 | Hydrophobicity              | Solvation free energy (Eisenberg-McLachlan, 1986)                                                     |
| EISD860102 | -0.1361 | 0.7864 | 2.000E-02 | 4.611E-02 | -0.0838 | 0.8205 | 4.191E-02 | 8.443E-02 | Hydrophobicity              | Atom-based hydrophobic moment (Eisenberg-McLachlan, 1986)                                             |
| EISD860103 | 0.0482  | 0.8149 | 2.755E-02 | 5.877E-02 | 0.0376  | 0.7733 | 4.619E-03 | 1.496E-02 | Hydrophobicity              | Direction of hydrophobic moment (Eisenberg-McLachlan, 1986)                                           |
| FASG760101 | 0.0276  | 0.7926 | 7.431E-03 | 2.073E-02 | 0.0276  | 0.8823 | 1.266E-01 | 2.044E-01 | Physicochemical properties  | Molecular weight (Fasman, 1976)                                                                       |
| FASG760102 | 0.0641  | 1.0246 | 5.620E-01 | 6.519E-01 | 0.0169  | 1.0028 | 7.940E-01 | 8.502E-01 | Hydrophobicity              | Melting point (Fasman, 1976)                                                                          |
| FASG760103 | 0.0039  | 0.9557 | 6.969E-01 | 7.769E-01 | 0.0039  | 0.9421 | 5.570E-01 | 6.460E-01 | Alpha and turn propensities | Optical rotation (Fasman, 1976)                                                                       |
| FASG760104 | -0.0896 | 0.8885 | 2.944E-01 | 3.906E-01 | -0.0655 | 0.9690 | 9.023E-01 | 9.243E-01 | Alpha and turn propensities | pK-N (Fasman, 1976)                                                                                   |
| FASG760105 | 0.0138  | 1.0694 | 2.681E-01 | 3.655E-01 | -0.0607 | 1.0192 | 6.007E-01 | 6.802E-01 | Hydrophobicity              | pK-C (Fasman, 1976)                                                                                   |
| FAUJ830101 | 0.0557  | 0.7691 | 6.500E-03 | 1.871E-02 | 0.0299  | 0.6794 | 6.971E-05 | 8.819E-04 | Hydrophobicity              | Hydrophobic parameter pi (Fauchere-Pliska, 1983)                                                      |
| FAUJ880101 | 0.0073  | 0.8437 | 6.839E-02 | 1.177E-01 | 0.0088  | 0.8073 | 1.697E-02 | 4.159E-02 | Physicochemical properties  | Graph shape index (Fauchere et al., 1988)                                                             |
| FAUJ880102 | 0.0136  | 0.9024 | 2.986E-01 | 3.950E-01 | -0.0354 | 0.9214 | 3.880E-01 | 4.897E-01 | Other properties            | Smoothed epsilon steric parameter (Fauchere et al., 1988)                                             |
| FAUJ880103 | 0.0185  | 0.7984 | 5.326E-03 | 1.614E-02 | 0.0185  | 0.8213 | 1.069E-02 | 2.951E-02 | Physicochemical properties  | Normalized van der Waals volume (Fauchere et al., 1988)                                               |
| FAUJ880104 | -0.0688 | 0.8191 | 1.293E-02 | 3.211E-02 | -0.0464 | 0.8892 | 1.218E-01 | 1.978E-01 | Physicochemical properties  | STERIMOL length of the side chain (Fauchere et al., 1988)                                             |
| FAUJ880105 | 0.0090  | 0.8205 | 5.742E-02 | 1.014E-01 | -0.0201 | 0.9000 | 3.006E-01 | 3.969E-01 | Physicochemical properties  | STERIMOL minimum width of the side chain (Fauchere et al., 1988)                                      |
| FAUJ880106 | -0.0015 | 0.7802 | 8.716E-03 | 2.280E-02 | 0.0029  | 0.8769 | 1.401E-01 | 2.210E-01 | Physicochemical properties  | STERIMOL maximum width of the side chain (Fauchere et al., 1988)                                      |
| FAUJ880107 | 0.0122  | 0.9889 | 9.723E-01 | 9.743E-01 | -0.0329 | 0.9528 | 6.468E-01 | 7.225E-01 | Other properties            | N.m.r. chemical shift of alpha-carbon (Fauchere et al., 1988)                                         |
| FAUJ880108 | 0.0460  | 0.9607 | 7.264E-01 | 8.016E-01 | 0.0460  | 1.0239 | 6.014E-01 | 6.802E-01 | Hydrophobicity              | Localized electrical effect (Fauchere et al., 1988)                                                   |
| FAUJ880109 | -0.0771 | 0.7774 | 7.084E-03 | 1.997E-02 | -0.0469 | 0.7945 | 8.223E-03 | 2.392E-02 | Hydrophobicity              | Number of hydrogen bond donors (Fauchere et al., 1988)                                                |
| FAUJ880110 | -0.0064 | 0.9326 | 5.026E-01 | 6.034E-01 | -0.0232 | 0.8435 | 7.190E-02 | 1.313E-01 | Hydrophobicity              | Number of full nonbonding orbitals (Fauchere et al., 1988)                                            |
| FAUJ880111 | -0.1172 | 0.7370 | 1.566E-03 | 6.926E-03 | -0.0338 | 0.8309 | 3.265E-02 | 6.992E-02 | Hydrophobicity              | Positive charge (Fauchere et al., 1988)                                                               |
| FAUJ880112 | -0.0162 | 0.9069 | 3.568E-01 | 4.515E-01 | -0.0155 | 0.8610 | 1.316E-01 | 2.106E-01 | Hydrophobicity              | Negative charge (Fauchere et al., 1988)                                                               |
| FAUJ880113 | 0.0248  | 1.0564 | 4.156E-01 | 5.127E-01 | 0.0128  | 1.0266 | 6.199E-01 | 6.968E-01 | Alpha and turn propensities | pK-a(RCOOH) (Fauchere et al., 1988)                                                                   |
| FINA770101 | -0.0144 | 1.0047 | 7.906E-01 | 8.466E-01 | -0.0666 | 1.0309 | 5.441E-01 | 6.352E-01 | Alpha and turn propensities | Helix-coil equilibrium constant (Finkelstein-Ptitsyn, 1977)                                           |
| FINA910101 | 0.0767  | 0.8830 | 1.525E-01 | 2.317E-01 | 0.0581  | 0.9436 | 4.856E-01 | 5.832E-01 | Hydrophobicity              | Helix initiation parameter at position i-1 (Finkelstein et al., 1991)                                 |
| FINA910102 | -0.0481 | 0.9099 | 3.734E-01 | 4.680E-01 | -0.0504 | 0.8393 | 7.801E-02 | 1.382E-01 | Alpha and turn propensities | Helix initiation parameter at position i <sub>i</sub> +1,i <sub>i</sub> +2 (Finkelstein et al., 1991) |
| FINA910103 | -0.1341 | 0.7279 | 1.371E-03 | 6.373E-03 | -0.0992 | 0.8012 | 1.620E-02 | 4.092E-02 | Hydrophobicity              | Helix termination parameter at position j-2,j-1,j (Finkelstein et al., 1991)                          |
| FINA910104 | -0.0350 | 0.7603 | 7.699E-03 | 2.115E-02 | 0.0170  | 0.8671 | 1.108E-01 | 1.838E-01 | Hydrophobicity              | Helix termination parameter at position j+1 (Finkelstein et al., 1991)                                |
| GARJ730101 | 0.1686  | 0.7607 | 2.931E-03 | 1.029E-02 | 0.1035  | 0.8079 | 1.209E-02 | 3.209E-02 | Physicochemical properties  | Partition coefficient (Garel et al., 1973)                                                            |
| GEIM800101 | -0.0782 | 1.1909 | 9.714E-03 | 2.493E-02 | -0.1003 | 1.1207 | 7.680E-02 | 1.365E-01 | Alpha and turn propensities | Alpha-helix indices (Geisow-Roberts, 1980)                                                            |
| GEIM800102 | 0.0345  | 0.7826 | 1.799E-02 | 4.238E-02 | 0.0225  | 0.8839 | 1.896E-01 | 2.744E-01 | Alpha and turn propensities | Alpha-helix indices for alpha-proteins (Geisow-Roberts, 1980)                                         |
| GEIM800103 | 0.0460  | 1.0375 | 4.866E-01 | 5.907E-01 | -0.0003 | 0.9347 | 5.330E-01 | 6.235E-01 | Alpha and turn propensities | Alpha-helix indices for beta-proteins (Geisow-Roberts, 1980)                                          |
| GEIM800104 | -0.0694 | 1.1039 | 1.149E-01 | 1.843E-01 | -0.1018 | 0.9710 | 8.124E-01 | 8.595E-01 | Alpha and turn propensities | Alpha-helix indices for alpha/beta-proteins (Geisow-Roberts, 1980)                                    |
| GEIM800105 | 0.0997  | 0.9563 | 7.089E-01 | 7.870E-01 | 0.0982  | 0.8695 | 1.095E-01 | 1.821E-01 | Beta propensity             | Beta-strand indices (Geisow-Roberts, 1980)                                                            |
| GEIM800106 | -0.0092 | 0.8456 | 4.498E-02 | 8.617E-02 | -0.0139 | 0.8310 | 2.086E-02 | 4.892E-02 | Beta propensity             | Beta-strand indices for beta-proteins (Geisow-Roberts, 1980)                                          |
| GEIM800107 | 0.0427  | 0.7517 | 1.508E-03 | 6.838E-03 | 0.0449  | 0.7445 | 6.157E-04 | 3.472E-03 | Beta propensity             | Beta-strand indices for alpha/beta-proteins (Geisow-Roberts, 1980)                                    |
| GEIM800108 | 0.0004  | 0.9222 | 4.494E-01 | 5.531E-01 | 0.0611  | 0.9171 | 3.873E-01 | 4.897E-01 | Alpha and turn propensities | Aperiodic indices (Geisow-Roberts, 1980)                                                              |
| GEIM800109 | -0.0233 | 0.8087 | 3.475E-02 | 7.054E-02 | 0.0072  | 0.8509 | 8.753E-02 | 1.521E-01 | Alpha and turn propensities | Aperiodic indices for alpha-proteins (Geisow-Roberts, 1980)                                           |

|            |         |        |           |           |         |        |           |           |                             |                                                                           |
|------------|---------|--------|-----------|-----------|---------|--------|-----------|-----------|-----------------------------|---------------------------------------------------------------------------|
| GEIM800110 | -0.0161 | 0.7664 | 1.317E-02 | 3.228E-02 | 0.0164  | 0.7800 | 1.337E-02 | 3.463E-02 | Beta propensity             | Aperiodic indices for beta-proteins (Geisow-Roberts, 1980)                |
| GEIM800111 | -0.0060 | 0.9486 | 6.485E-01 | 7.380E-01 | 0.0329  | 0.9235 | 4.029E-01 | 5.061E-01 | Alpha and turn propensities | Aperiodic indices for alpha/beta-proteins (Geisow-Roberts, 1980)          |
| GOLD730101 | -0.0124 | 0.7612 | 1.904E-03 | 7.788E-03 | -0.0122 | 0.7219 | 1.339E-04 | 1.271E-03 | Hydrophobicity              | Hydrophobicity factor (Goldsack-Chalifoux, 1973)                          |
| GOLD730102 | -0.0145 | 0.8393 | 3.251E-02 | 6.675E-02 | -0.0145 | 0.8631 | 5.971E-02 | 1.124E-01 | Physicochemical properties  | Residue volume (Goldsack-Chalifoux, 1973)                                 |
| GRAR740101 | 0.0132  | 1.2048 | 5.401E-03 | 1.623E-02 | 0.0460  | 1.2080 | 3.067E-03 | 1.112E-02 | Hydrophobicity              | Composition (Grantham, 1974)                                              |
| GRAR740102 | -0.0442 | 0.8623 | 1.167E-01 | 1.868E-01 | -0.0330 | 0.7837 | 8.920E-03 | 2.554E-02 | Hydrophobicity              | Polarity (Grantham, 1974)                                                 |
| GRAR740103 | -0.0058 | 0.8244 | 3.618E-02 | 7.235E-02 | -0.0127 | 0.8674 | 1.018E-01 | 1.725E-01 | Physicochemical properties  | Volume (Grantham, 1974)                                                   |
| GUYH850101 | -0.0824 | 0.6916 | 2.998E-04 | 2.260E-03 | -0.0797 | 0.6513 | 1.586E-05 | 3.751E-04 | Hydrophobicity              | Partition energy (Guy, 1985)                                              |
| HOPA770101 | 0.0062  | 0.8827 | 1.762E-01 | 2.590E-01 | 0.0144  | 0.8617 | 8.989E-02 | 1.552E-01 | Hydrophobicity              | Hydration number (Hopfinger, 1971), Cited by Charton-Charton (1982)       |
| HOPT810101 | -0.1104 | 0.8109 | 5.016E-02 | 9.345E-02 | -0.0488 | 0.7757 | 1.260E-02 | 3.313E-02 | Hydrophobicity              | Hydrophilicity value (Hopp-Woods, 1981)                                   |
| HUTJ700101 | 0.0941  | 0.7795 | 2.894E-03 | 1.022E-02 | 0.0669  | 0.7898 | 2.873E-03 | 1.056E-02 | Composition                 | Heat capacity (Hutchens, 1970)                                            |
| HUTJ700102 | -0.0234 | 0.7748 | 2.752E-03 | 9.913E-03 | -0.0019 | 0.8815 | 1.202E-01 | 1.958E-01 | Physicochemical properties  | Absolute entropy (Hutchens, 1970)                                         |
| HUTJ700103 | -0.0476 | 0.8391 | 4.781E-02 | 9.095E-02 | -0.0310 | 0.9067 | 2.656E-01 | 3.667E-01 | Physicochemical properties  | Entropy of formation (Hutchens, 1970)                                     |
| ISOY800101 | -0.0505 | 1.2602 | 1.024E-03 | 5.355E-03 | -0.0980 | 1.1170 | 1.035E-01 | 1.738E-01 | Alpha and turn propensities | Normalized relative frequency of alpha-helix (Isogai et al., 1980)        |
| ISOY800102 | 0.0900  | 1.0466 | 4.757E-01 | 5.815E-01 | 0.0863  | 0.9237 | 4.528E-01 | 5.487E-01 | Beta propensity             | Normalized relative frequency of extended structure (Isogai et al., 1980) |
| ISOY800103 | 0.0116  | 0.8771 | 1.808E-01 | 2.645E-01 | 0.0491  | 0.9818 | 9.316E-01 | 9.419E-01 | Alpha and turn propensities | Normalized relative frequency of bend (Isogai et al., 1980)               |
| ISOY800104 | -0.0841 | 0.8443 | 8.515E-02 | 1.430E-01 | -0.0608 | 0.8412 | 6.015E-02 | 1.128E-01 | Alpha and turn propensities | Normalized relative frequency of bend R (Isogai et al., 1980)             |
| ISOY800105 | 0.0586  | 0.9994 | 7.864E-01 | 8.452E-01 | 0.1588  | 1.1387 | 3.895E-02 | 7.966E-02 | Other properties            | Normalized relative frequency of bend S (Isogai et al., 1980)             |
| ISOY800106 | -0.0816 | 0.9081 | 2.924E-01 | 3.889E-01 | -0.1156 | 1.0315 | 4.406E-01 | 5.386E-01 | Alpha and turn propensities | Normalized relative frequency of helix end (Isogai et al., 1980)          |
| ISOY800107 | -0.0176 | 0.9607 | 7.877E-01 | 8.452E-01 | -0.0145 | 0.9241 | 4.513E-01 | 5.487E-01 | Hydrophobicity              | Normalized relative frequency of double bend (Isogai et al., 1980)        |
| ISOY800108 | 0.0606  | 1.0652 | 3.333E-01 | 4.282E-01 | 0.1311  | 1.2203 | 3.773E-03 | 1.307E-02 | Other properties            | Normalized relative frequency of coil (Isogai et al., 1980)               |
| JANJ780101 | -0.0635 | 0.7533 | 2.120E-03 | 8.420E-03 | -0.0432 | 0.7484 | 1.046E-03 | 4.853E-03 | Hydrophobicity              | Average accessible surface area (Janin et al., 1978)                      |
| JANJ780102 | 0.0754  | 0.7389 | 4.889E-03 | 1.511E-02 | 0.0561  | 0.7222 | 1.787E-03 | 7.212E-03 | Hydrophobicity              | Percentage of buried residues (Janin et al., 1978)                        |
| JANJ780103 | -0.0609 | 0.7607 | 2.845E-03 | 1.018E-02 | -0.0443 | 0.7381 | 6.537E-04 | 3.521E-03 | Hydrophobicity              | Percentage of exposed residues (Janin et al., 1978)                       |
| JANJ790101 | 0.1008  | 0.7786 | 5.798E-03 | 1.714E-02 | 0.1138  | 0.7631 | 1.792E-03 | 7.212E-03 | Hydrophobicity              | Ratio of buried and accessible molar fractions (Janin, 1979)              |
| JANJ790102 | 0.0656  | 0.7267 | 2.093E-03 | 8.420E-03 | 0.0416  | 0.7138 | 7.379E-04 | 3.798E-03 | Hydrophobicity              | Transfer free energy (Janin, 1979)                                        |
| JOND750101 | 0.0031  | 0.7455 | 1.591E-03 | 6.954E-03 | 0.0105  | 0.7078 | 1.378E-04 | 1.271E-03 | Hydrophobicity              | Hydrophobicity (Jones, 1975)                                              |
| JOND750102 | 0.0100  | 1.0872 | 2.195E-01 | 3.085E-01 | -0.0219 | 1.0988 | 1.577E-01 | 2.397E-01 | Hydrophobicity              | pK (-COOH) (Jones, 1975)                                                  |
| JOND920101 | -0.1033 | 1.2556 | 2.551E-04 | 2.055E-03 | -0.0923 | 1.2442 | 2.746E-04 | 1.965E-03 | Composition                 | Relative frequency of occurrence (Jones et al., 1992)                     |
| JOND920102 | -0.1287 | 0.9535 | 6.529E-01 | 7.416E-01 | -0.1780 | 1.0717 | 2.121E-01 | 2.974E-01 | Physicochemical properties  | Relative mutability (Jones et al., 1992)                                  |
| JUKT750101 | -0.0380 | 1.1645 | 1.667E-02 | 3.976E-02 | -0.0456 | 1.1973 | 2.718E-03 | 1.007E-02 | Composition                 | Amino acid distribution (Jukes et al., 1975)                              |
| JUNJ780101 | -0.0614 | 1.0118 | 6.939E-01 | 7.751E-01 | -0.0587 | 1.0967 | 1.170E-01 | 1.928E-01 | Composition                 | Sequence frequency (Jungck, 1978)                                         |
| KANM800101 | -0.0634 | 1.2716 | 4.080E-04 | 2.674E-03 | -0.0827 | 1.1411 | 5.067E-02 | 9.809E-02 | Alpha and turn propensities | Average relative probability of helix (Kanehisa-Tsong, 1980)              |
| KANM800102 | 0.0687  | 0.7377 | 6.607E-04 | 3.729E-03 | 0.0584  | 0.7261 | 1.655E-04 | 1.412E-03 | Beta propensity             | Average relative probability of beta-sheet (Kanehisa-Tsong, 1980)         |
| KANM800103 | -0.0259 | 1.2205 | 1.680E-03 | 7.196E-03 | -0.0864 | 1.1328 | 3.979E-02 | 8.107E-02 | Alpha and turn propensities | Average relative probability of inner helix (Kanehisa-Tsong, 1980)        |
| KANM800104 | 0.0714  | 0.7757 | 6.421E-03 | 1.863E-02 | 0.0654  | 0.7562 | 1.788E-03 | 7.212E-03 | Beta propensity             | Average relative probability of inner beta-sheet (Kanehisa-Tsong, 1980)   |
| KARP850101 | -0.0688 | 0.6577 | 1.278E-04 | 1.533E-03 | -0.0711 | 0.6719 | 1.428E-04 | 1.295E-03 | Hydrophobicity              | Flexibility parameter for no rigid neighbors (Karplus-Schulz, 1985)       |
| KARP850102 | -0.0454 | 0.6526 | 1.323E-05 | 3.753E-04 | -0.0404 | 0.6968 | 6.558E-05 | 8.819E-04 | Hydrophobicity              | Flexibility parameter for one rigid neighbor (Karplus-Schulz, 1985)       |
| KARP850103 | 0.0170  | 0.8800 | 1.643E-01 | 2.467E-01 | 0.0721  | 0.9465 | 5.930E-01 | 6.763E-01 | Composition                 | Flexibility parameter for two rigid neighbors (Karplus-Schulz, 1985)      |
| KHAG800101 | -0.1031 | 0.9109 | 3.459E-01 | 4.397E-01 | -0.0862 | 0.8801 | 1.489E-01 | 2.301E-01 | Hydrophobicity              | The Kerr-constant increments (Khanarian-Moore, 1980)                      |
| KLEP840101 | -0.1167 | 0.8303 | 9.760E-02 | 1.604E-01 | -0.0387 | 0.8330 | 8.933E-02 | 1.548E-01 | Hydrophobicity              | Net charge (Klein et al., 1984)                                           |
| KRIW710101 | -0.0775 | 0.6953 | 1.216E-03 | 5.904E-03 | -0.0619 | 0.8252 | 5.783E-02 | 1.098E-01 | Hydrophobicity              | Side chain interaction parameter (Krigbaum-Rubin, 1971)                   |
| KRIW790101 | -0.0830 | 0.6496 | 1.480E-06 | 1.150E-04 | -0.0746 | 0.6735 | 2.601E-06 | 1.014E-04 | Hydrophobicity              | Side chain interaction parameter (Krigbaum-Komoriya, 1979)                |
| KRIW790102 | -0.0558 | 0.6523 | 8.819E-06 | 3.198E-04 | -0.0325 | 0.6958 | 4.516E-05 | 7.020E-04 | Hydrophobicity              | Fraction of site occupied by water (Krigbaum-Komoriya, 1979)              |
| KRIW790103 | -0.0053 | 0.7841 | 2.751E-03 | 9.913E-03 | -0.0081 | 0.8585 | 4.068E-02 | 8.257E-02 | Physicochemical properties  | Side chain volume (Krigbaum-Komoriya, 1979)                               |
| KYTJ820101 | 0.0502  | 0.8424 | 5.514E-02 | 9.899E-02 | 0.0179  | 0.8033 | 1.100E-02 | 2.992E-02 | Hydrophobicity              | Hydropathy index (Kyte-Doolittle, 1982)                                   |
| LAWE840101 | -0.0314 | 0.8925 | 2.154E-01 | 3.044E-01 | -0.0463 | 0.8866 | 1.550E-01 | 2.374E-01 | Hydrophobicity              | Transfer free energy, CHP/water (Lawson et al., 1984)                     |
| LEVM760101 | -0.0935 | 0.7939 | 1.846E-02 | 4.310E-02 | -0.0388 | 0.7533 | 2.566E-03 | 9.695E-03 | Hydrophobicity              | Hydrophobic parameter (Levitt, 1976)                                      |
| LEVM760102 | -0.0148 | 0.7901 | 6.439E-03 | 1.863E-02 | -0.0134 | 0.8504 | 4.424E-02 | 8.783E-02 | Physicochemical properties  | Distance between C-alpha and centroid of side chain (Levitt, 1976)        |
| LEVM760103 | -0.0460 | 1.0143 | 7.747E-01 | 8.414E-01 | -0.0656 | 1.0288 | 6.072E-01 | 6.853E-01 | Other properties            | Side chain angle theta(AAR) (Levitt, 1976)                                |
| LEVM760104 | -0.0152 | 0.8217 | 3.631E-02 | 7.235E-02 | 0.0102  | 0.8929 | 2.015E-01 | 2.885E-01 | Other properties            | Side chain torsion angle phi(AAAR) (Levitt, 1976)                         |
| LEVM760105 | -0.0073 | 0.7907 | 5.057E-03 | 1.554E-02 | 0.0025  | 0.8546 | 4.741E-02 | 9.309E-02 | Physicochemical properties  | Radius of gyration of side chain (Levitt, 1976)                           |
| LEVM760106 | -0.0117 | 0.8169 | 1.837E-02 | 4.309E-02 | -0.0176 | 0.8743 | 9.278E-02 | 1.592E-01 | Physicochemical properties  | van der Waals parameter R0 (Levitt, 1976)                                 |



|            |         |        |           |           |         |        |           |           |                             |                                                                                |
|------------|---------|--------|-----------|-----------|---------|--------|-----------|-----------|-----------------------------|--------------------------------------------------------------------------------|
| LEVM760107 | 0.0982  | 0.7592 | 5.723E-04 | 3.421E-03 | 0.0948  | 0.7641 | 3.655E-04 | 2.425E-03 | Physicochemical properties  | van der Waals parameter epsilon (Levitt, 1976)                                 |
| LEVM780101 | -0.0713 | 1.1462 | 3.213E-02 | 6.626E-02 | -0.0858 | 1.0615 | 2.710E-01 | 3.704E-01 | Alpha and turn propensities | Normalized frequency of alpha-helix, with weights (Levitt, 1978)               |
| LEVM780102 | 0.0171  | 0.7835 | 4.178E-03 | 1.337E-02 | -0.0024 | 0.8511 | 4.322E-02 | 8.644E-02 | Beta propensity             | Normalized frequency of beta-sheet, with weights (Levitt, 1978)                |
| LEVM780103 | -0.0105 | 0.9643 | 8.083E-01 | 8.605E-01 | 0.0199  | 0.9299 | 4.873E-01 | 5.840E-01 | Alpha and turn propensities | Normalized frequency of reverse turn, with weights (Levitt, 1978)              |
| LEVM780104 | -0.0574 | 1.1838 | 8.247E-03 | 2.189E-02 | -0.0802 | 1.1502 | 2.311E-02 | 5.350E-02 | Alpha and turn propensities | Normalized frequency of alpha-helix, unweighted (Levitt, 1978)                 |
| LEVM780105 | 0.0914  | 0.7945 | 1.024E-02 | 2.592E-02 | 0.0407  | 0.7803 | 4.019E-03 | 1.361E-02 | Beta propensity             | Normalized frequency of beta-sheet, unweighted (Levitt, 1978)                  |
| LEVM780106 | -0.0164 | 0.8906 | 2.471E-01 | 3.438E-01 | 0.0309  | 0.8757 | 1.594E-01 | 2.414E-01 | Alpha and turn propensities | Normalized frequency of reverse turn, unweighted (Levitt, 1978)                |
| LEWP710101 | 0.0003  | 0.9575 | 6.766E-01 | 7.604E-01 | 0.0200  | 1.0369 | 5.158E-01 | 6.103E-01 | Alpha and turn propensities | Frequency of occurrence in beta-bends (Lewis et al., 1971)                     |
| LIFS790101 | 0.0320  | 0.6792 | 1.955E-04 | 1.858E-03 | 0.0066  | 0.7155 | 4.941E-04 | 3.154E-03 | Beta propensity             | Conformational preference for all beta-strands (Lifson-Sander, 1979)           |
| LIFS790102 | 0.0058  | 0.8016 | 7.954E-03 | 2.121E-02 | 0.0106  | 0.8468 | 3.079E-02 | 6.672E-02 | Beta propensity             | Conformational preference for parallel beta-strands (Lifson-Sander, 1979)      |
| LIFS790103 | 0.0817  | 0.7229 | 6.402E-03 | 1.863E-02 | 0.0273  | 0.7201 | 4.093E-03 | 1.366E-02 | Beta propensity             | Conformational preference for antiparallel beta-strands (Lifson-Sander, 1979)  |
| MANP780101 | 0.0506  | 0.6729 | 1.901E-05 | 4.496E-04 | 0.0506  | 0.6398 | 7.130E-07 | 4.310E-05 | Hydrophobicity              | Average surrounding hydrophobicity (Manavalan-Ponnuswamy, 1978)                |
| MAXF760101 | -0.0596 | 1.2350 | 1.843E-03 | 7.691E-03 | -0.0984 | 1.1102 | 1.066E-01 | 1.784E-01 | Alpha and turn propensities | Normalized frequency of alpha-helix (Maxfield-Scheraga, 1976)                  |
| MAXF760102 | 0.0757  | 1.0205 | 6.562E-01 | 7.437E-01 | 0.0514  | 0.8940 | 3.466E-01 | 4.458E-01 | Beta propensity             | Normalized frequency of extended structure (Maxfield-Scheraga, 1976)           |
| MAXF760103 | 0.0982  | 0.9923 | 9.579E-01 | 9.684E-01 | 0.0838  | 0.9707 | 7.762E-01 | 8.362E-01 | Other properties            | Normalized frequency of zeta R (Maxfield-Scheraga, 1976)                       |
| MAXF760104 | 0.0857  | 1.1240 | 9.045E-02 | 1.502E-01 | 0.1591  | 1.1536 | 3.044E-02 | 6.671E-02 | Other properties            | Normalized frequency of left-handed alpha-helix (Maxfield-Scheraga, 1976)      |
| MAXF760105 | 0.0721  | 0.8409 | 9.055E-02 | 1.502E-01 | 0.0919  | 0.9686 | 8.554E-01 | 8.921E-01 | Other properties            | Normalized frequency of zeta L (Maxfield-Scheraga, 1976)                       |
| MAXF760106 | -0.0640 | 0.8221 | 2.374E-02 | 5.272E-02 | -0.0749 | 0.8487 | 4.761E-02 | 9.309E-02 | Alpha and turn propensities | Normalized frequency of alpha region (Maxfield-Scheraga, 1976)                 |
| MCMT640101 | 0.0812  | 0.8491 | 7.949E-02 | 1.347E-01 | 0.0870  | 0.8832 | 1.807E-01 | 2.656E-01 | Physicochemical properties  | Refractivity (McMeekin et al., 1964), Cited by Jones (1975)                    |
| MEEJ800101 | -0.0143 | 0.9863 | 9.508E-01 | 9.650E-01 | -0.0191 | 0.8602 | 1.493E-01 | 2.301E-01 | Hydrophobicity              | Retention coefficient in HPLC, pH7.4 (Meek, 1980)                              |
| MEEJ800102 | 0.0396  | 0.8227 | 3.836E-02 | 7.588E-02 | 0.0127  | 0.7809 | 7.138E-03 | 2.182E-02 | Hydrophobicity              | Retention coefficient in HPLC, pH2.1 (Meek, 1980)                              |
| MEEJ810101 | 0.0489  | 0.7449 | 1.490E-03 | 6.812E-03 | 0.0309  | 0.7159 | 2.321E-04 | 1.779E-03 | Hydrophobicity              | Retention coefficient in NaClO4 (Meek-Rossetti, 1981)                          |
| MEEJ810102 | 0.0633  | 0.7418 | 2.405E-03 | 9.278E-03 | 0.0364  | 0.7264 | 5.437E-04 | 3.284E-03 | Hydrophobicity              | Retention coefficient in NaH2PO4 (Meek-Rossetti, 1981)                         |
| MEIH800101 | -0.0301 | 0.7240 | 3.988E-04 | 2.674E-03 | -0.0258 | 0.6899 | 3.313E-05 | 6.007E-04 | Hydrophobicity              | Average reduced distance for C-alpha (Meirovitch et al., 1980)                 |
| MEIH800102 | -0.0556 | 0.7084 | 6.041E-04 | 3.533E-03 | -0.0289 | 0.7227 | 6.525E-04 | 3.521E-03 | Hydrophobicity              | Average reduced distance for side chain (Meirovitch et al., 1980)              |
| MEIH800103 | 0.0298  | 0.7568 | 3.409E-03 | 1.145E-02 | 0.0237  | 0.7547 | 2.219E-03 | 8.561E-03 | Hydrophobicity              | Average side chain orientation angle (Meirovitch et al., 1980)                 |
| MIYS850101 | 0.0524  | 0.7359 | 2.698E-03 | 9.913E-03 | 0.0373  | 0.6961 | 2.663E-04 | 1.932E-03 | Hydrophobicity              | Effective partition energy (Miyazawa-Jernigan, 1985)                           |
| NAGK730101 | -0.0471 | 1.1509 | 3.050E-02 | 6.381E-02 | -0.0861 | 1.0762 | 2.058E-01 | 2.916E-01 | Alpha and turn propensities | Normalized frequency of alpha-helix (Nagano, 1973)                             |
| NAGK730102 | 0.0461  | 0.7565 | 4.189E-04 | 2.713E-03 | 0.0369  | 0.7923 | 1.793E-03 | 7.212E-03 | Beta propensity             | Normalized frequency of beta-structure (Nagano, 1973)                          |
| NAGK730103 | -0.0192 | 1.1728 | 1.186E-02 | 2.988E-02 | 0.0379  | 1.1070 | 8.733E-02 | 1.521E-01 | Alpha and turn propensities | Normalized frequency of coil (Nagano, 1973)                                    |
| NAKH900101 | -0.1335 | 1.3094 | 2.218E-05 | 5.027E-04 | -0.1335 | 1.2781 | 6.470E-05 | 8.819E-04 | Composition                 | AA composition of total proteins (Nakashima et al., 1990)                      |
| NAKH900102 | -0.1949 | 0.8770 | 1.493E-01 | 2.275E-01 | -0.1751 | 0.9857 | 9.148E-01 | 9.302E-01 | Composition                 | SD of AA composition of total proteins (Nakashima et al., 1990)                |
| NAKH900103 | -0.1266 | 1.0730 | 3.242E-01 | 4.219E-01 | -0.1653 | 1.0617 | 3.869E-01 | 4.897E-01 | Composition                 | AA composition of mt-proteins (Nakashima et al., 1990)                         |
| NAKH900104 | 0.0147  | 0.9278 | 5.050E-01 | 6.034E-01 | -0.0249 | 0.8504 | 8.694E-02 | 1.521E-01 | Hydrophobicity              | Normalized composition of mt-proteins (Nakashima et al., 1990)                 |
| NAKH900105 | -0.1168 | 1.0999 | 1.731E-01 | 2.566E-01 | -0.1640 | 0.9926 | 8.776E-01 | 9.073E-01 | Composition                 | AA composition of mt-proteins from animal (Nakashima et al., 1990)             |
| NAKH900106 | -0.0293 | 0.9777 | 8.357E-01 | 8.857E-01 | -0.0467 | 0.8686 | 1.277E-01 | 2.056E-01 | Hydrophobicity              | Normalized composition from animal (Nakashima et al., 1990)                    |
| NAKH900107 | -0.0734 | 1.0872 | 1.751E-01 | 2.582E-01 | -0.0927 | 1.1574 | 2.194E-02 | 5.122E-02 | Composition                 | AA composition of mt-proteins from fungi and plant (Nakashima et al., 1990)    |
| NAKH900108 | 0.0191  | 0.8821 | 1.221E-01 | 1.931E-01 | 0.0099  | 0.8733 | 7.344E-02 | 1.323E-01 | Hydrophobicity              | Normalized composition from fungi and plant (Nakashima et al., 1990)           |
| NAKH900109 | -0.0460 | 1.2995 | 8.524E-06 | 3.198E-04 | -0.0767 | 1.3048 | 1.484E-06 | 7.340E-05 | Composition                 | AA composition of membrane proteins (Nakashima et al., 1990)                   |
| NAKH900110 | 0.0564  | 0.8906 | 1.659E-01 | 2.480E-01 | -0.0139 | 0.8895 | 1.461E-01 | 2.271E-01 | Hydrophobicity              | Normalized composition of membrane proteins (Nakashima et al., 1990)           |
| NAKH900111 | -0.0290 | 1.0928 | 1.206E-01 | 1.913E-01 | -0.0550 | 1.1048 | 8.538E-02 | 1.498E-01 | Composition                 | Transmembrane regions of non-mt-proteins (Nakashima et al., 1990)              |
| NAKH900112 | -0.0859 | 1.0621 | 3.422E-01 | 4.365E-01 | -0.1377 | 1.0634 | 3.200E-01 | 4.183E-01 | Composition                 | Transmembrane regions of mt-proteins (Nakashima et al., 1990)                  |
| NAKH900113 | 0.0086  | 0.8423 | 4.920E-02 | 9.230E-02 | -0.0086 | 0.9329 | 4.222E-01 | 5.232E-01 | Hydrophobicity              | Ratio of average and computed composition (Nakashima et al., 1990)             |
| NAKH920101 | -0.1855 | 1.0674 | 2.762E-01 | 3.738E-01 | -0.1377 | 1.0443 | 4.163E-01 | 5.170E-01 | Composition                 | AA composition of CYT of single-spanning proteins (Nakashima-Nishikawa, 1992)  |
| NAKH920102 | -0.1668 | 1.0173 | 6.309E-01 | 7.210E-01 | -0.1563 | 0.9640 | 8.249E-01 | 8.663E-01 | Composition                 | AA composition of CYT2 of single-spanning proteins (Nakashima-Nishikawa, 1992) |
| NAKH920103 | -0.1117 | 1.0342 | 4.806E-01 | 5.862E-01 | -0.1117 | 1.0057 | 7.685E-01 | 8.312E-01 | Composition                 | AA composition of EXT of single-spanning proteins (Nakashima-Nishikawa, 1992)  |
| NAKH920104 | -0.0746 | 1.1492 | 8.600E-03 | 2.271E-02 | -0.1042 | 1.0515 | 2.087E-01 | 2.933E-01 | Composition                 | AA composition of EXT2 of single-spanning proteins (Nakashima-Nishikawa, 1992) |
| NAKH920105 | -0.0406 | 1.0585 | 2.647E-01 | 3.634E-01 | -0.0648 | 1.0447 | 3.437E-01 | 4.452E-01 | Composition                 | AA composition of MEM of single-spanning proteins (Nakashima-Nishikawa, 1992)  |
| NAKH920106 | -0.1654 | 1.1388 | 2.849E-02 | 6.032E-02 | -0.1464 | 1.0742 | 1.597E-01 | 2.414E-01 | Composition                 | AA composition of CYT of multi-spanning proteins (Nakashima-Nishikawa, 1992)   |
| NAKH920107 | -0.0338 | 1.1326 | 5.077E-02 | 9.395E-02 | -0.0513 | 1.1504 | 2.048E-02 | 4.845E-02 | Composition                 | AA composition of EXT of multi-spanning proteins (Nakashima-Nishikawa, 1992)   |
| NAKH920108 | -0.0557 | 1.0143 | 7.153E-01 | 7.925E-01 | -0.0593 | 1.0256 | 5.968E-01 | 6.778E-01 | Composition                 | AA composition of MEM of multi-spanning proteins (Nakashima-Nishikawa, 1992)   |
| NISK800101 | 0.0679  | 0.7100 | 9.164E-05 | 1.246E-03 | 0.0746  | 0.7003 | 2.244E-05 | 4.695E-04 | Hydrophobicity              | 8 A contact number (Nishikawa-Ooi, 1980)                                       |
| NISK860101 | 0.0474  | 0.6866 | 7.852E-05 | 1.228E-03 | 0.0414  | 0.6446 | 3.345E-06 | 1.213E-04 | Hydrophobicity              | 14 A contact number (Nishikawa-Ooi, 1986)                                      |

|            |         |        |           |           |         |        |           |           |                             |                                                                               |
|------------|---------|--------|-----------|-----------|---------|--------|-----------|-----------|-----------------------------|-------------------------------------------------------------------------------|
| NOZY710101 | 0.0574  | 0.7811 | 2.990E-03 | 1.043E-02 | 0.0027  | 0.7394 | 1.821E-04 | 1.478E-03 | Hydrophobicity              | Transfer energy, organic solvent/water (Nozaki-Tanford, 1971)                 |
| OOBM770101 | -0.0510 | 0.7574 | 2.655E-03 | 9.892E-03 | -0.0258 | 0.7469 | 9.202E-04 | 4.430E-03 | Hydrophobicity              | Average non-bonded energy per atom (Oobatake-Ooi, 1977)                       |
| OOBM770102 | -0.0516 | 0.8508 | 5.433E-02 | 9.829E-02 | 0.0237  | 0.8661 | 7.254E-02 | 1.318E-01 | Physicochemical properties  | Short and medium range non-bonded energy per atom (Oobatake-Ooi, 1977)        |
| OOBM770103 | -0.0766 | 0.7086 | 3.223E-04 | 2.297E-03 | -0.0678 | 0.7220 | 2.973E-04 | 2.100E-03 | Hydrophobicity              | Long range non-bonded energy per atom (Oobatake-Ooi, 1977)                    |
| OOBM770104 | -0.0643 | 0.7362 | 5.701E-04 | 3.421E-03 | -0.0439 | 0.7863 | 3.765E-03 | 1.307E-02 | Physicochemical properties  | Average non-bonded energy per residue (Oobatake-Ooi, 1977)                    |
| OOBM770105 | -0.0511 | 0.8078 | 1.694E-02 | 4.008E-02 | -0.0234 | 0.8238 | 5.228E-02 | 5.228E-02 | Physicochemical properties  | Short and medium range non-bonded energy per residue (Oobatake-Ooi, 1977)     |
| OOBM850101 | 0.0053  | 0.8219 | 5.812E-02 | 1.020E-01 | -0.0169 | 0.7893 | 1.672E-02 | 4.117E-02 | Beta propensity             | Optimized beta-structure-coil equilibrium constant (Oobatake et al., 1985)    |
| OOBM850102 | -0.0962 | 0.8778 | 1.873E-01 | 2.732E-01 | -0.0562 | 0.8903 | 2.042E-01 | 2.901E-01 | Physicochemical properties  | Optimized propensity to form reverse turn (Oobatake et al., 1985)             |
| OOBM850103 | 0.0089  | 0.9064 | 2.620E-01 | 3.608E-01 | -0.0014 | 0.9048 | 2.243E-01 | 3.129E-01 | Hydrophobicity              | Optimized transfer energy parameter (Oobatake et al., 1985)                   |
| OOBM850104 | 0.0269  | 0.7457 | 2.119E-03 | 8.420E-03 | 0.0180  | 0.7806 | 5.506E-03 | 1.731E-02 | Beta propensity             | Optimized average non-bonded energy per atom (Oobatake et al., 1985)          |
| OOBM850105 | -0.0779 | 0.7517 | 6.132E-03 | 1.803E-02 | -0.0468 | 0.8822 | 2.043E-01 | 2.901E-01 | Hydrophobicity              | Optimized side chain interaction parameter (Oobatake et al., 1985)            |
| PALJ810101 | -0.0564 | 1.1784 | 6.930E-03 | 1.974E-02 | -0.0851 | 1.1138 | 6.672E-02 | 1.230E-01 | Alpha and turn propensities | Normalized frequency of alpha-helix from LG (Palau et al., 1981)              |
| PALJ810102 | -0.0317 | 1.3018 | 6.717E-05 | 1.167E-03 | -0.1251 | 1.1953 | 6.118E-03 | 1.891E-02 | Alpha and turn propensities | Normalized frequency of alpha-helix from CF (Palau et al., 1981)              |
| PALJ810103 | 0.0862  | 0.7847 | 9.652E-03 | 2.488E-02 | 0.0700  | 0.7815 | 5.727E-03 | 1.780E-02 | Beta propensity             | Normalized frequency of beta-sheet from LG (Palau et al., 1981)               |
| PALJ810104 | 0.0728  | 0.7078 | 1.706E-04 | 1.760E-03 | 0.0586  | 0.7297 | 2.650E-04 | 1.932E-03 | Beta propensity             | Normalized frequency of beta-sheet from CF (Palau et al., 1981)               |
| PALJ810105 | 0.0070  | 0.9515 | 6.129E-01 | 7.034E-01 | 0.0552  | 1.0146 | 8.019E-01 | 8.520E-01 | Alpha and turn propensities | Normalized frequency of turn from LG (Palau et al., 1981)                     |
| PALJ810106 | -0.0097 | 1.0865 | 1.095E-01 | 1.762E-01 | 0.0663  | 1.0714 | 1.515E-01 | 2.328E-01 | Alpha and turn propensities | Normalized frequency of turn from CF (Palau et al., 1981)                     |
| PALJ810107 | 0.1490  | 0.8755 | 1.926E-01 | 2.795E-01 | 0.0815  | 1.0871 | 1.844E-01 | 2.697E-01 | Alpha and turn propensities | Normalized frequency of alpha-helix in all-alpha class (Palau et al., 1981)   |
| PALJ810108 | -0.0126 | 1.1629 | 2.289E-02 | 5.103E-02 | -0.0586 | 1.0444 | 4.136E-01 | 5.149E-01 | Alpha and turn propensities | Normalized frequency of alpha-helix in alpha+beta class (Palau et al., 1981)  |
| PALJ810109 | -0.0855 | 1.1502 | 2.096E-02 | 4.785E-02 | -0.1087 | 0.9821 | 8.806E-01 | 9.073E-01 | Alpha and turn propensities | Normalized frequency of alpha-helix in alpha/beta class (Palau et al., 1981)  |
| PALJ810110 | 0.0752  | 0.7127 | 1.678E-04 | 1.760E-03 | 0.0752  | 0.7212 | 1.306E-04 | 1.271E-03 | Beta propensity             | Normalized frequency of beta-sheet in all-beta class (Palau et al., 1981)     |
| PALJ810111 | 0.0429  | 0.8393 | 2.529E-02 | 5.525E-02 | 0.0499  | 0.8339 | 1.519E-02 | 3.863E-02 | Hydrophobicity              | Normalized frequency of beta-sheet in alpha+beta class (Palau et al., 1981)   |
| PALJ810112 | 0.0360  | 0.7809 | 6.976E-03 | 1.976E-02 | 0.0541  | 0.7531 | 9.746E-04 | 4.610E-03 | Beta propensity             | Normalized frequency of beta-sheet in alpha/beta class (Palau et al., 1981)   |
| PALJ810113 | -0.0198 | 0.8896 | 2.800E-01 | 3.771E-01 | 0.0428  | 1.0266 | 5.965E-01 | 6.778E-01 | Alpha and turn propensities | Normalized frequency of turn in all-alpha class (Palau et al., 1981)          |
| PALJ810114 | -0.0077 | 0.9793 | 9.471E-01 | 9.648E-01 | 0.0115  | 0.9596 | 7.082E-01 | 7.779E-01 | Alpha and turn propensities | Normalized frequency of turn in all-beta class (Palau et al., 1981)           |
| PALJ810115 | -0.0176 | 0.8765 | 2.109E-01 | 2.988E-01 | 0.0121  | 0.9330 | 5.211E-01 | 6.136E-01 | Alpha and turn propensities | Normalized frequency of turn in alpha+beta class (Palau et al., 1981)         |
| PALJ810116 | 0.0133  | 1.0966 | 1.456E-01 | 2.238E-01 | 0.0421  | 1.0529 | 4.658E-01 | 5.149E-01 | Alpha and turn propensities | Normalized frequency of turn in alpha/beta class (Palau et al., 1981)         |
| PARJ860101 | 0.0336  | 0.8199 | 3.215E-02 | 6.626E-02 | 0.0388  | 0.7604 | 2.113E-03 | 8.212E-03 | Hydrophobicity              | HPLC parameter (Parker et al., 1986)                                          |
| PLIV810101 | 0.0222  | 0.7956 | 1.575E-02 | 3.824E-02 | -0.0127 | 0.7632 | 3.182E-03 | 1.138E-02 | Hydrophobicity              | Partition coefficient (Pliska et al., 1981)                                   |
| PONP800101 | 0.0479  | 0.6693 | 1.676E-05 | 4.341E-04 | 0.0527  | 0.6202 | 2.632E-07 | 2.386E-05 | Hydrophobicity              | Surrounding hydrophobicity in folded form (Ponnuswamy et al., 1980)           |
| PONP800102 | 0.0842  | 0.6625 | 1.160E-05 | 3.741E-04 | 0.0854  | 0.6527 | 2.611E-06 | 1.014E-04 | Hydrophobicity              | Average gain in surrounding hydrophobicity (Ponnuswamy et al., 1980)          |
| PONP800103 | 0.0829  | 0.7246 | 2.848E-04 | 2.199E-03 | 0.0728  | 0.7249 | 1.694E-04 | 1.418E-03 | Hydrophobicity              | Average gain ratio in surrounding hydrophobicity (Ponnuswamy et al., 1980)    |
| PONP800104 | 0.0635  | 0.7752 | 2.650E-03 | 9.892E-03 | 0.0708  | 0.8213 | 1.657E-02 | 4.102E-02 | Hydrophobicity              | Surrounding hydrophobicity in alpha-helix (Ponnuswamy et al., 1980)           |
| PONP800105 | 0.0530  | 0.8432 | 4.698E-02 | 8.967E-02 | 0.0486  | 0.8525 | 5.531E-02 | 1.059E-01 | Hydrophobicity              | Surrounding hydrophobicity in beta-sheet (Ponnuswamy et al., 1980)            |
| PONP800106 | 0.0396  | 0.6976 | 1.119E-03 | 5.634E-03 | 0.0371  | 0.7463 | 4.602E-03 | 1.496E-02 | Hydrophobicity              | Surrounding hydrophobicity in turn (Ponnuswamy et al., 1980)                  |
| PONP800107 | -0.0003 | 0.8272 | 2.688E-02 | 5.803E-02 | -0.0346 | 0.8420 | 3.318E-02 | 7.024E-02 | Hydrophobicity              | Accessibility reduction ratio (Ponnuswamy et al., 1980)                       |
| PONP800108 | 0.0682  | 0.7223 | 2.871E-04 | 2.199E-03 | 0.0606  | 0.7048 | 5.761E-05 | 8.706E-04 | Hydrophobicity              | Average number of surrounding residues (Ponnuswamy et al., 1980)              |
| PRAM820101 | 0.0087  | 0.9197 | 3.766E-01 | 4.710E-01 | 0.0433  | 1.1019 | 1.032E-01 | 1.738E-01 | Hydrophobicity              | Intercept in regression analysis (Prabhakaran-Ponnuswamy, 1982)               |
| PRAM820102 | -0.0354 | 0.7508 | 8.803E-04 | 4.695E-03 | -0.0292 | 0.8284 | 1.749E-02 | 4.248E-02 | Other properties            | Slope in regression analysis x 1.0E1 (Prabhakaran-Ponnuswamy, 1982)           |
| PRAM820103 | -0.0395 | 0.9351 | 5.421E-01 | 6.383E-01 | -0.0948 | 0.9613 | 7.663E-01 | 8.304E-01 | Other properties            | Correlation coefficient in regression analysis (Prabhakaran-Ponnuswamy, 1982) |
| PRAM900101 | -0.0863 | 0.8165 | 5.439E-02 | 9.829E-02 | -0.0019 | 0.7622 | 7.792E-03 | 2.304E-02 | Hydrophobicity              | Hydrophobicity (Prabhakaran, 1990)                                            |
| PRAM900102 | -0.0713 | 1.1462 | 3.141E-02 | 6.546E-02 | -0.0858 | 1.0615 | 2.745E-01 | 3.714E-01 | Alpha and turn propensities | Relative frequency in alpha-helix (Prabhakaran, 1990)                         |
| PRAM900103 | 0.0171  | 0.7835 | 3.963E-03 | 1.283E-02 | -0.0024 | 0.8511 | 4.275E-02 | 8.581E-02 | Beta propensity             | Relative frequency in beta-sheet (Prabhakaran, 1990)                          |
| PRAM900104 | -0.0161 | 0.9623 | 7.853E-01 | 8.452E-01 | 0.0192  | 0.9224 | 4.332E-01 | 5.320E-01 | Alpha and turn propensities | Relative frequency in reverse-turn (Prabhakaran, 1990)                        |
| PTIO830101 | 0.0103  | 1.0102 | 7.632E-01 | 8.354E-01 | -0.0335 | 0.9456 | 5.885E-01 | 6.725E-01 | Alpha and turn propensities | Helix-coil equilibrium constant (Ptitsyn-Finkelstein, 1983)                   |
| PTIO830102 | 0.0491  | 0.7221 | 4.038E-04 | 2.674E-03 | 0.0354  | 0.7469 | 6.475E-04 | 3.521E-03 | Beta propensity             | Beta-coil equilibrium constant (Ptitsyn-Finkelstein, 1983)                    |
| QIAN880101 | -0.0345 | 1.1542 | 1.634E-02 | 3.933E-02 | -0.0264 | 1.1221 | 4.396E-02 | 8.761E-02 | Alpha and turn propensities | Weights for alpha-helix at the window position of -6 (Qian-Sejnowski, 1988)   |
| QIAN880102 | -0.0704 | 1.3230 | 1.169E-05 | 3.741E-04 | -0.1020 | 1.2202 | 1.681E-03 | 6.981E-03 | Alpha and turn propensities | Weights for alpha-helix at the window position of -5 (Qian-Sejnowski, 1988)   |
| QIAN880103 | 0.0238  | 1.3279 | 1.240E-05 | 3.748E-04 | -0.0329 | 1.1561 | 2.333E-02 | 5.377E-02 | Alpha and turn propensities | Weights for alpha-helix at the window position of -4 (Qian-Sejnowski, 1988)   |
| QIAN880104 | -0.0263 | 1.2237 | 2.457E-03 | 9.381E-03 | -0.0860 | 1.2085 | 3.202E-03 | 1.138E-02 | Alpha and turn propensities | Weights for alpha-helix at the window position of -3 (Qian-Sejnowski, 1988)   |
| QIAN880105 | 0.0245  | 1.2058 | 4.571E-03 | 1.446E-02 | -0.0929 | 1.1754 | 1.083E-02 | 2.962E-02 | Alpha and turn propensities | Weights for alpha-helix at the window position of -2 (Qian-Sejnowski, 1988)   |
| QIAN880106 | -0.0147 | 1.2657 | 4.582E-04 | 2.899E-03 | -0.0637 | 1.1930 | 7.358E-03 | 2.199E-02 | Alpha and turn propensities | Weights for alpha-helix at the window position of -1 (Qian-Sejnowski, 1988)   |
| QIAN880107 | -0.0586 | 1.1663 | 1.203E-02 | 3.016E-02 | -0.0867 | 1.1067 | 8.451E-02 | 1.488E-01 | Alpha and turn propensities | Weights for alpha-helix at the window position of 0 (Qian-Sejnowski, 1988)    |

|            |         |        |           |           |         |        |           |           |                             |                                                                              |
|------------|---------|--------|-----------|-----------|---------|--------|-----------|-----------|-----------------------------|------------------------------------------------------------------------------|
| QIAN880108 | 0.0065  | 1.1297 | 6.960E-02 | 1.187E-01 | -0.0105 | 1.0300 | 5.536E-01 | 6.439E-01 | Alpha and turn propensities | Weights for alpha-helix at the window position of 1 (Qian-Sejnowski, 1988)   |
| QIAN880109 | 0.0054  | 1.0019 | 8.077E-01 | 8.605E-01 | -0.0332 | 0.9955 | 8.774E-01 | 9.073E-01 | Alpha and turn propensities | Weights for alpha-helix at the window position of 2 (Qian-Sejnowski, 1988)   |
| QIAN880110 | -0.0092 | 1.1148 | 1.024E-01 | 1.668E-01 | -0.0501 | 1.0893 | 1.715E-01 | 2.549E-01 | Alpha and turn propensities | Weights for alpha-helix at the window position of 3 (Qian-Sejnowski, 1988)   |
| QIAN880111 | -0.0114 | 1.0055 | 7.666E-01 | 8.374E-01 | -0.0409 | 0.9942 | 8.792E-01 | 9.073E-01 | Alpha and turn propensities | Weights for alpha-helix at the window position of 4 (Qian-Sejnowski, 1988)   |
| QIAN880112 | 0.0174  | 1.0930 | 2.106E-01 | 2.988E-01 | -0.0527 | 1.0723 | 3.046E-01 | 4.012E-01 | Alpha and turn propensities | Weights for alpha-helix at the window position of 5 (Qian-Sejnowski, 1988)   |
| QIAN880113 | -0.0682 | 0.9335 | 4.876E-01 | 5.907E-01 | -0.0637 | 0.9527 | 6.658E-01 | 7.392E-01 | Alpha and turn propensities | Weights for alpha-helix at the window position of 6 (Qian-Sejnowski, 1988)   |
| QIAN880114 | 0.0591  | 0.8403 | 2.013E-02 | 4.621E-02 | 0.0673  | 0.8457 | 1.659E-02 | 4.102E-02 | Hydrophobicity              | Weights for beta-sheet at the window position of -6 (Qian-Sejnowski, 1988)   |
| QIAN880115 | 0.0284  | 0.8135 | 2.197E-02 | 4.958E-02 | 0.0223  | 0.8062 | 1.141E-02 | 3.072E-02 | Hydrophobicity              | Weights for beta-sheet at the window position of -5 (Qian-Sejnowski, 1988)   |
| QIAN880116 | -0.0122 | 0.9850 | 8.735E-01 | 9.037E-01 | 0.0012  | 0.9983 | 9.904E-01 | 9.922E-01 | Hydrophobicity              | Weights for beta-sheet at the window position of -4 (Qian-Sejnowski, 1988)   |
| QIAN880117 | -0.0255 | 0.9361 | 4.820E-01 | 5.866E-01 | 0.0312  | 1.1305 | 6.835E-02 | 1.256E-01 | Alpha and turn propensities | Weights for beta-sheet at the window position of -3 (Qian-Sejnowski, 1988)   |
| QIAN880118 | -0.0210 | 0.9834 | 9.680E-01 | 9.743E-01 | 0.0046  | 0.9397 | 5.164E-01 | 6.103E-01 | Beta propensity             | Weights for beta-sheet at the window position of -2 (Qian-Sejnowski, 1988)   |
| QIAN880119 | -0.0078 | 0.7601 | 8.890E-03 | 2.314E-02 | -0.0383 | 0.7447 | 3.623E-03 | 1.280E-02 | Beta propensity             | Weights for beta-sheet at the window position of -1 (Qian-Sejnowski, 1988)   |
| QIAN880120 | 0.0312  | 0.7207 | 1.148E-03 | 5.695E-03 | 0.0065  | 0.7350 | 1.136E-03 | 5.064E-03 | Beta propensity             | Weights for beta-sheet at the window position of 0 (Qian-Sejnowski, 1988)    |
| QIAN880121 | 0.0355  | 0.6818 | 2.171E-04 | 1.905E-03 | 0.0278  | 0.7017 | 3.122E-04 | 2.150E-03 | Beta propensity             | Weights for beta-sheet at the window position of 1 (Qian-Sejnowski, 1988)    |
| QIAN880122 | 0.0423  | 0.7354 | 6.650E-04 | 3.729E-03 | 0.0541  | 0.7088 | 8.072E-05 | 9.148E-04 | Beta propensity             | Weights for beta-sheet at the window position of 2 (Qian-Sejnowski, 1988)    |
| QIAN880123 | 0.1052  | 1.0398 | 5.251E-01 | 6.236E-01 | 0.0904  | 0.9622 | 6.511E-01 | 7.245E-01 | Physicochemical properties  | Weights for beta-sheet at the window position of 3 (Qian-Sejnowski, 1988)    |
| QIAN880124 | 0.0950  | 1.0968 | 1.362E-01 | 2.111E-01 | 0.1233  | 1.1011 | 1.085E-01 | 1.811E-01 | Physicochemical properties  | Weights for beta-sheet at the window position of 4 (Qian-Sejnowski, 1988)    |
| QIAN880125 | 0.0617  | 0.8416 | 4.843E-02 | 9.148E-02 | 0.0445  | 0.8359 | 3.072E-02 | 6.672E-02 | Physicochemical properties  | Weights for beta-sheet at the window position of 5 (Qian-Sejnowski, 1988)    |
| QIAN880126 | 0.0504  | 0.9189 | 3.027E-01 | 3.979E-01 | 0.0522  | 0.9051 | 1.960E-01 | 2.821E-01 | Hydrophobicity              | Weights for beta-sheet at the window position of 6 (Qian-Sejnowski, 1988)    |
| QIAN880127 | 0.0329  | 0.8587 | 9.277E-02 | 1.534E-01 | 0.0293  | 0.9247 | 3.811E-01 | 4.846E-01 | Hydrophobicity              | Weights for coil at the window position of -6 (Qian-Sejnowski, 1988)         |
| QIAN880128 | 0.0188  | 0.9867 | 9.001E-01 | 9.274E-01 | 0.0599  | 1.0209 | 7.475E-01 | 8.133E-01 | Hydrophobicity              | Weights for coil at the window position of -5 (Qian-Sejnowski, 1988)         |
| QIAN880129 | 0.0033  | 1.0276 | 5.559E-01 | 6.485E-01 | 0.0549  | 0.9853 | 9.842E-01 | 9.879E-01 | Alpha and turn propensities | Weights for coil at the window position of -4 (Qian-Sejnowski, 1988)         |
| QIAN880130 | -0.0008 | 1.2965 | 1.380E-05 | 3.753E-04 | 0.0776  | 1.2635 | 6.063E-05 | 8.819E-04 | Alpha and turn propensities | Weights for coil at the window position of -3 (Qian-Sejnowski, 1988)         |
| QIAN880131 | -0.0146 | 0.9717 | 8.369E-01 | 8.857E-01 | 0.0529  | 0.9325 | 4.348E-01 | 5.328E-01 | Alpha and turn propensities | Weights for coil at the window position of -2 (Qian-Sejnowski, 1988)         |
| QIAN880132 | 0.0011  | 1.0199 | 7.358E-01 | 8.087E-01 | 0.0672  | 0.9606 | 7.057E-01 | 7.771E-01 | Alpha and turn propensities | Weights for coil at the window position of -1 (Qian-Sejnowski, 1988)         |
| QIAN880133 | -0.0095 | 0.8956 | 3.297E-01 | 4.250E-01 | 0.0343  | 0.9035 | 3.461E-01 | 4.458E-01 | Alpha and turn propensities | Weights for coil at the window position of 0 (Qian-Sejnowski, 1988)          |
| QIAN880134 | -0.0476 | 0.8616 | 1.358E-01 | 2.110E-01 | -0.0048 | 0.8533 | 9.228E-02 | 1.589E-01 | Alpha and turn propensities | Weights for coil at the window position of 1 (Qian-Sejnowski, 1988)          |
| QIAN880135 | -0.0482 | 0.8753 | 1.299E-01 | 2.036E-01 | -0.0184 | 0.8726 | 1.010E-01 | 1.716E-01 | Alpha and turn propensities | Weights for coil at the window position of 2 (Qian-Sejnowski, 1988)          |
| QIAN880136 | -0.0044 | 0.8845 | 2.908E-01 | 3.877E-01 | 0.0046  | 0.9167 | 4.598E-01 | 5.547E-01 | Alpha and turn propensities | Weights for coil at the window position of 3 (Qian-Sejnowski, 1988)          |
| QIAN880137 | -0.0425 | 0.8419 | 6.142E-02 | 1.071E-01 | -0.0161 | 0.7905 | 7.232E-03 | 2.198E-02 | Alpha and turn propensities | Weights for coil at the window position of 4 (Qian-Sejnowski, 1988)          |
| QIAN880138 | 0.0069  | 1.0132 | 6.085E-01 | 6.998E-01 | 0.0529  | 1.0047 | 6.943E-01 | 7.677E-01 | Alpha and turn propensities | Weights for coil at the window position of 5 (Qian-Sejnowski, 1988)          |
| QIAN880139 | 0.0571  | 0.9478 | 6.692E-01 | 7.537E-01 | 0.0281  | 0.9981 | 7.860E-01 | 8.433E-01 | Alpha and turn propensities | Weights for coil at the window position of 6 (Qian-Sejnowski, 1988)          |
| RACS770101 | -0.0150 | 0.7375 | 1.172E-03 | 5.742E-03 | -0.0219 | 0.7068 | 1.499E-04 | 1.315E-03 | Hydrophobicity              | Average reduced distance for C-alpha (Rackovsky-Scheraga, 1977)              |
| RACS770102 | -0.0306 | 0.7554 | 3.906E-03 | 1.272E-02 | -0.0193 | 0.7136 | 4.133E-04 | 2.709E-03 | Hydrophobicity              | Average reduced distance for side chain (Rackovsky-Scheraga, 1977)           |
| RACS770103 | -0.0437 | 0.7150 | 9.723E-04 | 5.135E-03 | -0.0231 | 0.7645 | 4.945E-03 | 1.573E-02 | Hydrophobicity              | Side chain orientational preference (Rackovsky-Scheraga, 1977)               |
| RACS820101 | -0.0429 | 0.8407 | 4.337E-02 | 8.426E-02 | -0.0577 | 0.8065 | 9.082E-03 | 2.587E-02 | Hydrophobicity              | Average relative fractional occurrence in A0(i) (Rackovsky-Scheraga, 1982)   |
| RACS820102 | -0.1827 | 1.0943 | 1.054E-01 | 1.702E-01 | -0.2105 | 1.0335 | 4.327E-01 | 5.320E-01 | Other properties            | Average relative fractional occurrence in AR(i) (Rackovsky-Scheraga, 1982)   |
| RACS820103 | -0.0093 | 0.9087 | 2.782E-01 | 3.755E-01 | 0.0394  | 0.9679 | 7.740E-01 | 8.355E-01 | Hydrophobicity              | Average relative fractional occurrence in AL(i) (Rackovsky-Scheraga, 1982)   |
| RACS820104 | -0.0029 | 1.5824 | 5.298E-12 | 2.882E-09 | 0.0473  | 1.4753 | 7.860E-10 | 4.276E-07 | Alpha and turn propensities | Average relative fractional occurrence in EL(i) (Rackovsky-Scheraga, 1982)   |
| RACS820105 | 0.0586  | 0.7395 | 5.012E-04 | 3.098E-03 | 0.0258  | 0.7829 | 2.261E-03 | 8.663E-03 | Composition                 | Average relative fractional occurrence in E0(i) (Rackovsky-Scheraga, 1982)   |
| RACS820106 | 0.0667  | 1.0820 | 1.975E-01 | 2.838E-01 | 0.1135  | 1.1301 | 4.774E-02 | 9.309E-02 | Other properties            | Average relative fractional occurrence in ER(i) (Rackovsky-Scheraga, 1982)   |
| RACS820107 | 0.1472  | 1.4282 | 5.933E-09 | 1.614E-06 | 0.2058  | 1.3650 | 1.206E-07 | 1.640E-05 | Other properties            | Average relative fractional occurrence in A0(i-1) (Rackovsky-Scheraga, 1982) |
| RACS820108 | -0.0103 | 1.2035 | 4.759E-03 | 1.488E-02 | -0.0570 | 1.0615 | 2.800E-01 | 3.751E-01 | Alpha and turn propensities | Average relative fractional occurrence in AR(i-1) (Rackovsky-Scheraga, 1982) |
| RACS820109 | 0.1128  | 1.0015 | 8.618E-01 | 8.996E-01 | 0.1461  | 1.1082 | 1.644E-01 | 2.477E-01 | Other properties            | Average relative fractional occurrence in AL(i-1) (Rackovsky-Scheraga, 1982) |
| RACS820110 | -0.0385 | 0.9215 | 4.027E-01 | 5.013E-01 | 0.0211  | 0.8946 | 2.080E-01 | 2.932E-01 | Alpha and turn propensities | Average relative fractional occurrence in EL(i-1) (Rackovsky-Scheraga, 1982) |
| RACS820111 | -0.0057 | 0.9023 | 2.808E-01 | 3.772E-01 | -0.0049 | 0.9125 | 3.122E-01 | 4.093E-01 | Beta propensity             | Average relative fractional occurrence in E0(i-1) (Rackovsky-Scheraga, 1982) |
| RACS820112 | 0.0981  | 0.9000 | 3.364E-01 | 4.306E-01 | 0.0835  | 0.9613 | 8.153E-01 | 8.595E-01 | Alpha and turn propensities | Average relative fractional occurrence in ER(i-1) (Rackovsky-Scheraga, 1982) |
| RACS820113 | 0.0932  | 1.3317 | 9.037E-05 | 1.246E-03 | 0.1292  | 1.2486 | 1.582E-03 | 6.725E-03 | Other properties            | Value of theta(i) (Rackovsky-Scheraga, 1982)                                 |
| RACS820114 | 0.0146  | 1.0959 | 1.789E-01 | 2.623E-01 | 0.0330  | 1.0679 | 3.001E-01 | 3.969E-01 | Alpha and turn propensities | Value of theta(i-1) (Rackovsky-Scheraga, 1982)                               |
| RADA880101 | 0.0619  | 0.8564 | 1.470E-01 | 2.247E-01 | 0.0229  | 0.7854 | 1.651E-02 | 4.102E-02 | Hydrophobicity              | Transfer free energy from chx to wat (Radzicka-Wolfenden, 1988)              |
| RADA880102 | 0.0562  | 0.8157 | 9.801E-03 | 2.503E-02 | 0.0482  | 0.7547 | 2.611E-04 | 1.932E-03 | Hydrophobicity              | Transfer free energy from oct to wat (Radzicka-Wolfenden, 1988)              |
| RADA880103 | -0.0399 | 0.7515 | 5.490E-03 | 1.632E-02 | -0.0399 | 0.8186 | 3.542E-02 | 7.387E-02 | Physicochemical properties  | Transfer free energy from vap to chx (Radzicka-Wolfenden, 1988)              |
| RADA880104 | 0.0716  | 0.8161 | 5.066E-02 | 9.395E-02 | 0.0504  | 0.8039 | 2.727E-02 | 6.105E-02 | Hydrophobicity              | Transfer free energy from chx to oct (Radzicka-Wolfenden, 1988)              |

|                   |         |        |           |           |         |        |           |           |                             |                                                                           |
|-------------------|---------|--------|-----------|-----------|---------|--------|-----------|-----------|-----------------------------|---------------------------------------------------------------------------|
| <b>RADA880105</b> | 0.0640  | 0.8324 | 3.503E-02 | 7.062E-02 | 0.0547  | 0.8328 | 2.642E-02 | 5.988E-02 | Hydrophobicity              | Transfer free energy from vap to oct (Radzicka-Wolfenden, 1988)           |
| <b>RADA880106</b> | 0.0020  | 0.8494 | 1.034E-01 | 1.678E-01 | -0.0108 | 0.8538 | 9.452E-02 | 1.617E-01 | Physicochemical properties  | Accessible surface area (Radzicka-Wolfenden, 1988)                        |
| <b>RADA880107</b> | 0.0695  | 0.7834 | 2.102E-02 | 4.785E-02 | 0.0451  | 0.7433 | 3.907E-03 | 1.337E-02 | Hydrophobicity              | Energy transfer from out to in(95%buried) (Radzicka-Wolfenden, 1988)      |
| <b>RADA880108</b> | 0.0670  | 0.7112 | 6.452E-04 | 3.694E-03 | 0.0597  | 0.6770 | 6.879E-05 | 8.819E-04 | Hydrophobicity              | Mean polarity (Radzicka-Wolfenden, 1988)                                  |
| <b>RICJ880101</b> | 0.0534  | 0.9985 | 8.513E-01 | 8.940E-01 | 0.0627  | 1.0862 | 1.700E-01 | 2.541E-01 | Other properties            | Relative preference value at N <sup>1</sup> (Richardson-Richardson, 1988) |
| <b>RICJ880102</b> | 0.0534  | 0.9985 | 8.501E-01 | 8.940E-01 | 0.0627  | 1.0862 | 1.708E-01 | 2.546E-01 | Other properties            | Relative preference value at N <sup>1</sup> (Richardson-Richardson, 1988) |
| <b>RICJ880103</b> | 0.0740  | 0.9569 | 6.300E-01 | 7.210E-01 | 0.0900  | 1.0061 | 8.182E-01 | 8.610E-01 | Other properties            | Relative preference value at N-cap (Richardson-Richardson, 1988)          |
| <b>RICJ880104</b> | 0.0341  | 0.8645 | 1.948E-01 | 2.818E-01 | -0.0377 | 0.9683 | 7.781E-01 | 8.365E-01 | Hydrophobicity              | Relative preference value at N1 (Richardson-Richardson, 1988)             |
| <b>RICJ880105</b> | 0.0393  | 1.1347 | 8.971E-02 | 1.497E-01 | 0.0606  | 1.0363 | 5.656E-01 | 6.546E-01 | Hydrophobicity              | Relative preference value at N2 (Richardson-Richardson, 1988)             |
| <b>RICJ880106</b> | 0.0239  | 0.9863 | 9.568E-01 | 9.684E-01 | 0.0034  | 0.8755 | 2.686E-01 | 3.699E-01 | Hydrophobicity              | Relative preference value at N3 (Richardson-Richardson, 1988)             |
| <b>RICJ880107</b> | -0.0044 | 1.0166 | 7.085E-01 | 7.870E-01 | -0.0487 | 1.0310 | 5.686E-01 | 6.563E-01 | Alpha and turn propensities | Relative preference value at N4 (Richardson-Richardson, 1988)             |
| <b>RICJ880108</b> | -0.0565 | 0.9775 | 8.719E-01 | 9.037E-01 | -0.0296 | 0.9736 | 8.069E-01 | 8.557E-01 | Hydrophobicity              | Relative preference value at N5 (Richardson-Richardson, 1988)             |
| <b>RICJ880109</b> | 0.0021  | 1.3155 | 3.116E-06 | 1.883E-04 | -0.0461 | 1.2213 | 5.044E-04 | 3.154E-03 | Alpha and turn propensities | Relative preference value at Mid (Richardson-Richardson, 1988)            |
| <b>RICJ880110</b> | -0.0691 | 1.3076 | 4.695E-06 | 2.322E-04 | -0.1083 | 1.2169 | 6.666E-04 | 3.555E-03 | Alpha and turn propensities | Relative preference value at C5 (Richardson-Richardson, 1988)             |
| <b>RICJ880111</b> | 0.0048  | 0.8957 | 1.666E-01 | 2.483E-01 | 0.0007  | 0.8660 | 5.175E-02 | 9.982E-02 | Hydrophobicity              | Relative preference value at C4 (Richardson-Richardson, 1988)             |
| <b>RICJ880112</b> | -0.0462 | 1.0423 | 4.965E-01 | 5.989E-01 | -0.0648 | 0.9932 | 9.740E-01 | 9.794E-01 | Alpha and turn propensities | Relative preference value at C3 (Richardson-Richardson, 1988)             |
| <b>RICJ880113</b> | -0.1117 | 0.9256 | 4.093E-01 | 5.083E-01 | -0.0992 | 0.8531 | 7.270E-02 | 1.318E-01 | Alpha and turn propensities | Relative preference value at C2 (Richardson-Richardson, 1988)             |
| <b>RICJ880114</b> | -0.0125 | 0.8508 | 9.474E-02 | 1.562E-01 | -0.0076 | 0.9837 | 9.938E-01 | 9.938E-01 | Alpha and turn propensities | Relative preference value at C1 (Richardson-Richardson, 1988)             |
| <b>RICJ880115</b> | -0.0162 | 0.9657 | 7.933E-01 | 8.479E-01 | 0.0523  | 1.0330 | 5.847E-01 | 6.697E-01 | Other properties            | Relative preference value at C-cap (Richardson-Richardson, 1988)          |
| <b>RICJ880116</b> | -0.1282 | 0.8662 | 1.646E-01 | 2.467E-01 | -0.0846 | 0.8542 | 1.035E-01 | 1.738E-01 | Alpha and turn propensities | Relative preference value at C <sup>1</sup> (Richardson-Richardson, 1988) |
| <b>RICJ880117</b> | 0.1168  | 0.9858 | 9.595E-01 | 9.684E-01 | 0.1039  | 0.9693 | 8.147E-01 | 8.595E-01 | Alpha and turn propensities | Relative preference value at C <sup>1</sup> (Richardson-Richardson, 1988) |
| <b>ROBB760101</b> | -0.0467 | 1.2977 | 1.747E-04 | 1.760E-03 | -0.0864 | 1.1920 | 9.735E-03 | 2.716E-02 | Alpha and turn propensities | Information measure for alpha-helix (Robson-Suzuki, 1976)                 |
| <b>ROBB760102</b> | 0.0464  | 0.9100 | 3.265E-01 | 4.229E-01 | 0.0183  | 0.9105 | 2.897E-01 | 3.853E-01 | Hydrophobicity              | Information measure for N-terminal helix (Robson-Suzuki, 1976)            |
| <b>ROBB760103</b> | -0.0125 | 1.2376 | 2.325E-03 | 9.033E-03 | -0.0359 | 1.1285 | 7.634E-02 | 1.362E-01 | Alpha and turn propensities | Information measure for middle helix (Robson-Suzuki, 1976)                |
| <b>ROBB760104</b> | 0.0305  | 0.8645 | 1.584E-01 | 2.401E-01 | 0.0344  | 0.8058 | 2.880E-02 | 6.420E-02 | Alpha and turn propensities | Information measure for C-terminal helix (Robson-Suzuki, 1976)            |
| <b>ROBB760105</b> | 0.0619  | 0.8106 | 2.277E-02 | 5.098E-02 | 0.0396  | 0.8154 | 2.007E-02 | 4.772E-02 | Beta propensity             | Information measure for extended (Robson-Suzuki, 1976)                    |
| <b>ROBB760106</b> | 0.0287  | 0.7421 | 3.240E-03 | 1.102E-02 | 0.0287  | 0.7466 | 2.715E-03 | 1.007E-02 | Beta propensity             | Information measure for pleated-sheet (Robson-Suzuki, 1976)               |
| <b>ROBB760107</b> | 0.0144  | 1.1733 | 1.291E-02 | 3.211E-02 | 0.0165  | 1.1672 | 1.327E-02 | 3.453E-02 | Alpha and turn propensities | Information measure for extended without H-bond (Robson-Suzuki, 1976)     |
| <b>ROBB760108</b> | -0.0215 | 1.2718 | 7.201E-05 | 1.187E-03 | 0.1324  | 1.2097 | 1.100E-03 | 4.947E-03 | Alpha and turn propensities | Information measure for turn (Robson-Suzuki, 1976)                        |
| <b>ROBB760109</b> | 0.0303  | 1.0594 | 3.036E-01 | 3.979E-01 | 0.0388  | 1.0524 | 3.353E-01 | 4.354E-01 | Alpha and turn propensities | Information measure for N-terminal turn (Robson-Suzuki, 1976)             |
| <b>ROBB760110</b> | -0.0118 | 1.2555 | 2.087E-04 | 1.905E-03 | 0.1095  | 1.2143 | 8.556E-04 | 4.156E-03 | Alpha and turn propensities | Information measure for middle turn (Robson-Suzuki, 1976)                 |
| <b>ROBB760111</b> | 0.0750  | 1.2296 | 1.367E-03 | 6.373E-03 | 0.0924  | 1.2631 | 1.227E-04 | 1.236E-03 | Alpha and turn propensities | Information measure for C-terminal turn (Robson-Suzuki, 1976)             |
| <b>ROBB760112</b> | 0.0176  | 1.0026 | 8.582E-01 | 8.978E-01 | 0.0208  | 0.9760 | 8.560E-01 | 8.921E-01 | Alpha and turn propensities | Information measure for coil (Robson-Suzuki, 1976)                        |
| <b>ROBB760113</b> | -0.0228 | 1.2157 | 1.560E-03 | 6.926E-03 | 0.1187  | 1.2091 | 1.239E-03 | 5.435E-03 | Alpha and turn propensities | Information measure for loop (Robson-Suzuki, 1976)                        |
| <b>ROBB790101</b> | 0.0597  | 0.7563 | 1.839E-03 | 7.691E-03 | 0.0597  | 0.7240 | 1.956E-04 | 1.565E-03 | Hydrophobicity              | Hydration free energy (Robson-Osguthorpe, 1979)                           |
| <b>ROSG850101</b> | 0.0420  | 0.7478 | 3.019E-03 | 1.046E-02 | 0.0210  | 0.7672 | 4.449E-03 | 1.458E-02 | Physicochemical properties  | Mean area buried on transfer (Rose et al., 1985)                          |
| <b>ROSG850102</b> | 0.0633  | 0.6647 | 5.310E-05 | 9.961E-04 | 0.0613  | 0.6685 | 3.026E-05 | 5.768E-04 | Hydrophobicity              | Mean fractional area loss (Rose et al., 1985)                             |
| <b>ROSM880101</b> | -0.0433 | 0.8765 | 2.007E-01 | 2.865E-01 | -0.0044 | 0.7799 | 1.323E-02 | 3.453E-02 | Hydrophobicity              | Side chain hydropathy, uncorrected for solvation (Roseman, 1988)          |
| <b>ROSM880102</b> | -0.0392 | 0.7762 | 1.300E-02 | 3.216E-02 | -0.0037 | 0.7293 | 1.487E-03 | 6.371E-03 | Hydrophobicity              | Side chain hydropathy, corrected for solvation (Roseman, 1988)            |
| <b>ROSM880103</b> | 0.0700  | 0.9719 | 9.434E-01 | 9.629E-01 | 0.0054  | 1.0180 | 5.694E-01 | 6.563E-01 | Hydrophobicity              | Loss of Side chain hydropathy by helix formation (Roseman, 1988)          |
| <b>SIMZ760101</b> | 0.0036  | 0.7721 | 2.738E-03 | 9.913E-03 | -0.0255 | 0.7531 | 5.808E-04 | 3.361E-03 | Hydrophobicity              | Transfer free energy (Simon, 1976), Cited by Charton-Charton (1982)       |
| <b>SNEP660101</b> | -0.0364 | 1.0698 | 2.688E-01 | 3.655E-01 | -0.1101 | 1.1028 | 1.187E-01 | 1.944E-01 | Alpha and turn propensities | Principal component I (Sneath, 1966)                                      |
| <b>SNEP660102</b> | -0.0108 | 0.9131 | 3.338E-01 | 4.282E-01 | -0.0194 | 0.8485 | 5.794E-02 | 1.098E-01 | Hydrophobicity              | Principal component II (Sneath, 1966)                                     |
| <b>SNEP660103</b> | 0.0603  | 0.8476 | 3.004E-02 | 6.309E-02 | 0.0534  | 0.8615 | 3.797E-02 | 7.796E-02 | Physicochemical properties  | Principal component III (Sneath, 1966)                                    |
| <b>SNEP660104</b> | 0.0871  | 1.0228 | 6.340E-01 | 7.231E-01 | 0.0838  | 1.0727 | 2.453E-01 | 3.413E-01 | Alpha and turn propensities | Principal component IV (Sneath, 1966)                                     |
| <b>SUEM840101</b> | -0.0466 | 1.0729 | 2.719E-01 | 3.689E-01 | -0.1035 | 1.0118 | 7.164E-01 | 7.825E-01 | Alpha and turn propensities | Zimm-Bragg parameter s at 20 C (Sueki et al., 1984)                       |
| <b>SUEM840102</b> | 0.0524  | 0.8464 | 7.341E-02 | 1.248E-01 | -0.0244 | 0.8122 | 1.870E-02 | 4.500E-02 | Hydrophobicity              | Zimm-Bragg parameter sigma x 1.0E4 (Sueki et al., 1984)                   |
| <b>SWER830101</b> | 0.0438  | 0.8286 | 3.580E-02 | 7.185E-02 | 0.0438  | 0.7511 | 1.095E-03 | 4.947E-03 | Hydrophobicity              | Optimal matching hydrophobicity (Sweet-Eisenberg, 1983)                   |
| <b>TANS770101</b> | -0.0703 | 1.2482 | 1.097E-03 | 5.576E-03 | -0.1012 | 1.1475 | 3.714E-02 | 7.652E-02 | Alpha and turn propensities | Normalized frequency of alpha-helix (Tanaka-Scheraga, 1977)               |
| <b>TANS770102</b> | -0.0424 | 1.0212 | 5.527E-01 | 6.467E-01 | -0.0581 | 1.0806 | 1.454E-01 | 2.267E-01 | Alpha and turn propensities | Normalized frequency of isolated helix (Tanaka-Scheraga, 1977)            |
| <b>TANS770103</b> | 0.0336  | 1.0372 | 4.991E-01 | 6.007E-01 | 0.0123  | 0.9050 | 3.651E-01 | 4.674E-01 | Beta propensity             | Normalized frequency of extended structure (Tanaka-Scheraga, 1977)        |
| <b>TANS770104</b> | -0.0752 | 0.7909 | 3.152E-02 | 6.546E-02 | -0.0663 | 0.7765 | 1.625E-02 | 4.092E-02 | Alpha and turn propensities | Normalized frequency of chain reversal R (Tanaka-Scheraga, 1977)          |
| <b>TANS770105</b> | 0.1836  | 1.1898 | 4.826E-03 | 1.500E-02 | 0.2304  | 1.1445 | 1.442E-02 | 3.700E-02 | Other properties            | Normalized frequency of chain reversal S (Tanaka-Scheraga, 1977)          |

|            |         |        |           |           |         |        |           |           |                             |                                                                                   |
|------------|---------|--------|-----------|-----------|---------|--------|-----------|-----------|-----------------------------|-----------------------------------------------------------------------------------|
| TANS770106 | 0.0480  | 0.8481 | 5.231E-02 | 9.582E-02 | 0.0712  | 0.9136 | 2.784E-01 | 3.740E-01 | Hydrophobicity              | Normalized frequency of chain reversal D (Tanaka-Scheraga, 1977)                  |
| TANS770107 | 0.0943  | 1.1380 | 8.158E-02 | 1.375E-01 | 0.1943  | 1.2373 | 3.130E-03 | 1.128E-02 | Other properties            | Normalized frequency of left-handed helix (Tanaka-Scheraga, 1977)                 |
| TANS770108 | -0.0357 | 0.9827 | 9.725E-01 | 9.743E-01 | 0.0138  | 1.0709 | 2.029E-01 | 2.897E-01 | Hydrophobicity              | Normalized frequency of zeta R (Tanaka-Scheraga, 1977)                            |
| TANS770109 | 0.0730  | 0.9122 | 3.531E-01 | 4.477E-01 | 0.1067  | 1.0769 | 2.012E-01 | 2.885E-01 | Other properties            | Normalized frequency of coil (Tanaka-Scheraga, 1977)                              |
| TANS770110 | 0.0109  | 0.9800 | 9.050E-01 | 9.290E-01 | 0.0658  | 0.9564 | 6.421E-01 | 7.202E-01 | Alpha and turn propensities | Normalized frequency of chain reversal (Tanaka-Scheraga, 1977)                    |
| VASM830101 | -0.0138 | 0.9956 | 8.498E-01 | 8.940E-01 | -0.0070 | 1.0031 | 8.013E-01 | 8.520E-01 | Alpha and turn propensities | Relative population of conformational state A (Vasquez et al., 1983)              |
| VASM830102 | -0.0471 | 0.9638 | 7.258E-01 | 8.016E-01 | -0.0574 | 0.9814 | 9.136E-01 | 9.302E-01 | Hydrophobicity              | Relative population of conformational state C (Vasquez et al., 1983)              |
| VASM830103 | 0.0742  | 0.9780 | 8.754E-01 | 9.037E-01 | 0.0630  | 0.9416 | 4.042E-01 | 5.067E-01 | Hydrophobicity              | Relative population of conformational state E (Vasquez et al., 1983)              |
| VELV850101 | 0.0274  | 0.9775 | 8.632E-01 | 8.996E-01 | 0.0320  | 1.0462 | 4.303E-01 | 5.311E-01 | Hydrophobicity              | Electron-ion interaction potential (Veljkovic et al., 1985)                       |
| VENT840101 | 0.0305  | 0.7618 | 2.466E-03 | 9.381E-03 | 0.0207  | 0.7681 | 1.879E-03 | 7.356E-03 | Hydrophobicity              | Bitterness (Venanzi, 1984)                                                        |
| VHEG790101 | -0.0736 | 0.9346 | 4.665E-01 | 5.715E-01 | -0.0012 | 0.8900 | 1.785E-01 | 2.632E-01 | Hydrophobicity              | Transfer free energy to lipophilic phase (von Heijne-Blomberg, 1979)              |
| WARP780101 | -0.0023 | 0.8376 | 4.256E-02 | 8.299E-02 | -0.0264 | 0.7973 | 7.902E-03 | 2.319E-02 | Hydrophobicity              | Average interactions per side chain atom (Warme-Morgan, 1978)                     |
| WEBA780101 | -0.1438 | 0.7631 | 1.598E-03 | 6.954E-03 | -0.0844 | 0.7950 | 4.061E-03 | 1.364E-02 | Physicochemical properties  | RF value in high salt chromatography (Weber-Lacey, 1978)                          |
| WERD780101 | 0.0679  | 0.7161 | 2.495E-04 | 2.055E-03 | 0.0501  | 0.7097 | 8.064E-05 | 9.148E-04 | Hydrophobicity              | Propensity to be buried inside (Wertz-Scheraga, 1978)                             |
| WERD780102 | 0.1192  | 0.9422 | 5.498E-01 | 6.446E-01 | 0.1291  | 0.9425 | 5.172E-01 | 6.103E-01 | Other properties            | Free energy change of epsilon(i) to epsilon(ex) (Wertz-Scheraga, 1978)            |
| WERD780103 | 0.1260  | 0.9820 | 9.721E-01 | 9.743E-01 | 0.0796  | 1.0411 | 4.529E-01 | 5.487E-01 | Hydrophobicity              | Free energy change of alpha(Ri) to alpha(Rh) (Wertz-Scheraga, 1978)               |
| WERD780104 | 0.0436  | 0.8603 | 9.849E-02 | 1.614E-01 | 0.0436  | 0.8464 | 5.783E-02 | 1.098E-01 | Hydrophobicity              | Free energy change of epsilon(i) to alpha(Rh) (Wertz-Scheraga, 1978)              |
| WOEC730101 | -0.0120 | 0.8873 | 2.599E-01 | 3.588E-01 | 0.0037  | 0.8179 | 4.171E-02 | 8.435E-02 | Hydrophobicity              | Polar requirement (Woese, 1973)                                                   |
| WOLR810101 | 0.0553  | 0.8546 | 6.888E-02 | 1.178E-01 | 0.0159  | 0.8360 | 2.893E-02 | 6.424E-02 | Hydrophobicity              | Hydration potential (Wolfenden et al., 1981)                                      |
| WOLS870101 | 0.0110  | 0.8413 | 4.475E-02 | 8.602E-02 | 0.0316  | 0.8145 | 1.209E-02 | 3.209E-02 | Hydrophobicity              | Principal property value z1 (Wold et al., 1987)                                   |
| WOLS870102 | -0.0295 | 0.8538 | 8.882E-02 | 1.487E-01 | -0.0168 | 0.8858 | 1.879E-01 | 2.733E-01 | Physicochemical properties  | Principal property value z2 (Wold et al., 1987)                                   |
| WOLS870103 | 0.1282  | 1.0827 | 3.251E-01 | 4.221E-01 | 0.1282  | 1.0774 | 2.858E-01 | 3.811E-01 | Alpha and turn propensities | Principal property value z3 (Wold et al., 1987)                                   |
| YUTK870101 | 0.0553  | 0.7862 | 3.317E-03 | 1.121E-02 | 0.0344  | 0.7626 | 5.024E-04 | 3.154E-03 | Hydrophobicity              | Unfolding Gibbs energy in water, pH7.0 (Yutani et al., 1987)                      |
| YUTK870102 | 0.0188  | 0.9827 | 9.348E-01 | 9.577E-01 | -0.0279 | 0.8797 | 1.443E-01 | 2.261E-01 | Hydrophobicity              | Unfolding Gibbs energy in water, pH9.0 (Yutani et al., 1987)                      |
| YUTK870103 | 0.1178  | 0.8675 | 1.261E-01 | 1.983E-01 | 0.0743  | 0.9453 | 5.779E-01 | 6.647E-01 | Hydrophobicity              | Activation Gibbs energy of unfolding, pH7.0 (Yutani et al., 1987)                 |
| YUTK870104 | 0.1079  | 0.8833 | 2.181E-01 | 3.074E-01 | 0.0812  | 0.9535 | 6.931E-01 | 7.677E-01 | Hydrophobicity              | Activation Gibbs energy of unfolding, pH9.0 (Yutani et al., 1987)                 |
| ZASB820101 | 0.0602  | 0.9057 | 2.907E-01 | 3.877E-01 | 0.0641  | 0.8928 | 1.874E-01 | 2.733E-01 | Physicochemical properties  | Dependence of partition coefficient on ionic strength (Zaslavsky et al., 1968)    |
| ZIMJ680101 | -0.0386 | 0.8249 | 2.515E-02 | 5.517E-02 | -0.0204 | 0.7880 | 4.338E-03 | 1.430E-02 | Hydrophobicity              | Hydrophobicity (Zimmerman et al., 1968)                                           |
| ZIMJ680102 | 0.0167  | 0.8528 | 1.343E-01 | 2.100E-01 | -0.0106 | 0.9048 | 3.114E-01 | 4.092E-01 | Physicochemical properties  | Bulkiness (Zimmerman et al., 1968)                                                |
| ZIMJ680103 | -0.0579 | 0.9005 | 3.035E-01 | 3.979E-01 | -0.0266 | 0.8466 | 6.478E-02 | 1.199E-01 | Hydrophobicity              | Polarity (Zimmerman et al., 1968)                                                 |
| ZIMJ680104 | -0.1693 | 0.8281 | 6.497E-02 | 1.122E-01 | -0.1143 | 0.8969 | 2.740E-01 | 3.714E-01 | Hydrophobicity              | Isoelectric point (Zimmerman et al., 1968)                                        |
| ZIMJ680105 | -0.0516 | 0.9563 | 6.662E-01 | 7.519E-01 | -0.0740 | 0.9086 | 2.613E-01 | 3.618E-01 | Hydrophobicity              | RF rank (Zimmerman et al., 1968)                                                  |
| AURR980101 | -0.1047 | 0.9306 | 5.137E-01 | 6.115E-01 | -0.1102 | 0.9207 | 4.062E-01 | 5.080E-01 | Undefined                   | Normalized positional residue frequency at helix termini N4' (Aurora-Rose, 1968)  |
| AURR980102 | -0.1359 | 0.8120 | 5.606E-02 | 9.999E-02 | -0.0896 | 0.9783 | 9.003E-01 | 9.241E-01 | Undefined                   | Normalized positional residue frequency at helix termini N''' (Aurora-Rose, 1968) |
| AURR980103 | -0.0339 | 1.0570 | 4.145E-01 | 5.124E-01 | -0.0518 | 1.1279 | 8.320E-02 | 1.470E-01 | Undefined                   | Normalized positional residue frequency at helix termini N'' (Aurora-Rose, 1968)  |
| AURR980104 | -0.0176 | 0.8252 | 4.954E-02 | 9.262E-02 | -0.0231 | 0.8695 | 1.356E-01 | 2.156E-01 | Undefined                   | Normalized positional residue frequency at helix termini N' (Aurora-Rose, 1968)   |
| AURR980105 | 0.0088  | 0.9013 | 2.656E-01 | 3.634E-01 | -0.0068 | 0.9310 | 4.426E-01 | 5.399E-01 | Undefined                   | Normalized positional residue frequency at helix termini Nc (Aurora-Rose, 1968)   |
| AURR980106 | -0.1128 | 0.9032 | 3.168E-01 | 4.133E-01 | -0.1259 | 0.9012 | 2.736E-01 | 3.714E-01 | Undefined                   | Normalized positional residue frequency at helix termini N1 (Aurora-Rose, 1968)   |
| AURR980107 | -0.0476 | 1.1417 | 1.003E-01 | 1.639E-01 | -0.0980 | 1.0450 | 4.938E-01 | 5.892E-01 | Undefined                   | Normalized positional residue frequency at helix termini N2 (Aurora-Rose, 1968)   |
| AURR980108 | -0.0530 | 1.2708 | 1.153E-04 | 1.476E-03 | -0.1012 | 1.1364 | 3.492E-02 | 7.335E-02 | Undefined                   | Normalized positional residue frequency at helix termini N3 (Aurora-Rose, 1968)   |
| AURR980109 | -0.0386 | 1.2155 | 1.338E-03 | 6.365E-03 | -0.1061 | 1.0848 | 1.425E-01 | 2.240E-01 | Undefined                   | Normalized positional residue frequency at helix termini N4 (Aurora-Rose, 1968)   |
| AURR980110 | -0.0882 | 1.2727 | 8.475E-05 | 1.246E-03 | -0.0934 | 1.1392 | 2.392E-02 | 5.491E-02 | Undefined                   | Normalized positional residue frequency at helix termini N5 (Aurora-Rose, 1968)   |
| AURR980111 | -0.0804 | 1.3297 | 2.858E-05 | 5.757E-04 | -0.1257 | 1.1870 | 9.581E-03 | 2.701E-02 | Undefined                   | Normalized positional residue frequency at helix termini C5 (Aurora-Rose, 1968)   |
| AURR980112 | -0.0786 | 1.2567 | 2.689E-04 | 2.120E-03 | -0.1131 | 1.1579 | 1.041E-02 | 2.890E-02 | Undefined                   | Normalized positional residue frequency at helix termini C4 (Aurora-Rose, 1968)   |
| AURR980113 | -0.0265 | 1.2533 | 7.614E-04 | 4.142E-03 | -0.0929 | 1.1895 | 7.929E-03 | 2.319E-02 | Undefined                   | Normalized positional residue frequency at helix termini C3 (Aurora-Rose, 1968)   |
| AURR980114 | -0.0675 | 1.0883 | 1.446E-01 | 2.228E-01 | -0.0950 | 1.0395 | 4.078E-01 | 5.088E-01 | Undefined                   | Normalized positional residue frequency at helix termini C2 (Aurora-Rose, 1968)   |
| AURR980115 | -0.1137 | 1.2970 | 6.862E-05 | 1.167E-03 | -0.1298 | 1.1277 | 5.527E-02 | 1.059E-01 | Undefined                   | Normalized positional residue frequency at helix termini C1 (Aurora-Rose, 1968)   |
| AURR980116 | -0.0744 | 1.1625 | 1.934E-02 | 4.497E-02 | -0.1009 | 1.0808 | 1.891E-01 | 2.743E-01 | Undefined                   | Normalized positional residue frequency at helix termini Cc (Aurora-Rose, 1968)   |
| AURR980117 | 0.0051  | 0.9380 | 5.893E-01 | 6.807E-01 | 0.0819  | 1.0814 | 2.079E-01 | 2.932E-01 | Undefined                   | Normalized positional residue frequency at helix termini C' (Aurora-Rose, 1968)   |
| AURR980118 | -0.0456 | 0.9646 | 8.571E-01 | 8.978E-01 | -0.0445 | 0.9368 | 5.303E-01 | 6.218E-01 | Undefined                   | Normalized positional residue frequency at helix termini C'' (Aurora-Rose, 1968)  |
| AURR980119 | -0.1331 | 0.7982 | 3.979E-02 | 7.815E-02 | -0.1138 | 0.8174 | 5.024E-02 | 9.761E-02 | Undefined                   | Normalized positional residue frequency at helix termini C''' (Aurora-Rose, 1968) |
| AURR980120 | -0.0693 | 0.8359 | 6.382E-02 | 1.106E-01 | -0.0306 | 0.8864 | 1.812E-01 | 2.657E-01 | Undefined                   | Normalized positional residue frequency at helix termini C4' (Aurora-Rose, 1968)  |
| ONEK900101 | 0.0028  | 1.0918 | 1.920E-01 | 2.793E-01 | -0.0114 | 1.0743 | 2.742E-01 | 3.714E-01 | Undefined                   | Delta G values for the peptides extrapolated to 0 M urea (O'Neil-DeGrado, 1968)   |

|            |         |        |           |           |         |        |           |           |           |                                                                               |
|------------|---------|--------|-----------|-----------|---------|--------|-----------|-----------|-----------|-------------------------------------------------------------------------------|
| ONEK900102 | -0.0147 | 1.0197 | 6.851E-01 | 7.668E-01 | -0.0231 | 0.9823 | 9.356E-01 | 9.443E-01 | Undefined | Helix formation parameters (delta delta G) (O'Neil-DeGrado, 1990)             |
| VINM940101 | -0.0873 | 0.7039 | 7.902E-05 | 1.228E-03 | -0.0630 | 0.7154 | 6.679E-05 | 8.819E-04 | Undefined | Normalized flexibility parameters (B-values), average (Vihinen et al., 1994)  |
| VINM940102 | -0.0961 | 0.6907 | 3.114E-04 | 2.289E-03 | -0.0746 | 0.7185 | 6.746E-04 | 3.563E-03 | Undefined | Normalized flexibility parameters (B-values) for each residue surrounded by   |
| VINM940103 | -0.1096 | 0.6254 | 1.151E-07 | 2.086E-05 | -0.1224 | 0.6493 | 1.784E-07 | 1.941E-05 | Undefined | Normalized flexibility parameters (B-values) for each residue surrounded by   |
| VINM940104 | -0.0538 | 0.7814 | 3.880E-03 | 1.272E-02 | -0.0459 | 0.7601 | 8.506E-04 | 4.156E-03 | Undefined | Normalized flexibility parameters (B-values) for each residue surrounded by   |
| MUNV940101 | 0.0344  | 1.0981 | 1.612E-01 | 2.436E-01 | 0.0456  | 0.9982 | 8.694E-01 | 9.026E-01 | Undefined | Free energy in alpha-helical conformation (Munoz-Serrano, 1994)               |
| MUNV940102 | 0.0438  | 1.2360 | 4.282E-03 | 1.362E-02 | 0.0756  | 1.0902 | 1.768E-01 | 2.613E-01 | Undefined | Free energy in alpha-helical region (Munoz-Serrano, 1994)                     |
| MUNV940103 | -0.0545 | 0.7058 | 1.090E-03 | 5.576E-03 | -0.0471 | 0.7168 | 1.021E-03 | 4.789E-03 | Undefined | Free energy in beta-strand conformation (Munoz-Serrano, 1994)                 |
| MUNV940104 | -0.0600 | 0.8081 | 5.342E-02 | 9.752E-02 | -0.0503 | 0.7979 | 3.258E-02 | 6.992E-02 | Undefined | Free energy in beta-strand region (Munoz-Serrano, 1994)                       |
| MUNV940105 | -0.0585 | 0.8419 | 1.183E-01 | 1.882E-01 | -0.0332 | 0.8646 | 1.669E-01 | 2.502E-01 | Undefined | Free energy in beta-strand region (Munoz-Serrano, 1994)                       |
| WIMW960101 | 0.0806  | 0.8949 | 2.528E-01 | 3.508E-01 | 0.0802  | 0.8116 | 1.943E-02 | 4.657E-02 | Undefined | Free energies of transfer of AcWI-X-LL peptides from bilayer interface to     |
| KIMC930101 | -0.0475 | 0.7899 | 2.260E-02 | 5.079E-02 | 0.0065  | 0.8334 | 6.470E-02 | 1.199E-01 | Undefined | Thermodynamic beta sheet propensity (Kim-Berg, 1993)                          |
| MONM990101 | -0.0732 | 0.8686 | 1.645E-01 | 2.467E-01 | -0.0113 | 0.7592 | 3.676E-03 | 1.290E-02 | Undefined | Turn propensity scale for transmembrane helices (Monne et al., 1999)          |
| BLAM930101 | 0.0276  | 1.0065 | 7.784E-01 | 8.435E-01 | 0.0166  | 0.9570 | 7.119E-01 | 7.793E-01 | Undefined | Alpha helix propensity of position 44 in T4 lysozyme (Blaber et al., 1993)    |
| PARS000101 | -0.0792 | 0.6918 | 2.262E-04 | 1.953E-03 | -0.0316 | 0.6744 | 4.067E-05 | 6.914E-04 | Undefined | p-Values of mesophilic proteins based on the distributions of B values        |
| PARS000102 | -0.0973 | 0.8706 | 1.967E-01 | 2.838E-01 | -0.0973 | 0.7814 | 1.488E-02 | 3.799E-02 | Undefined | p-Values of thermophilic proteins based on the distributions of B values      |
| KUMS000101 | -0.0118 | 1.1451 | 3.401E-02 | 6.955E-02 | -0.0228 | 1.1889 | 4.885E-03 | 1.572E-02 | Undefined | Distribution of amino acid residues in the 18 non-redundant families of       |
| KUMS000102 | 0.0000  | 1.1472 | 2.122E-02 | 4.810E-02 | -0.0338 | 1.2321 | 2.237E-04 | 1.739E-03 | Undefined | Distribution of amino acid residues in the 18 non-redundant families of       |
| KUMS000103 | -0.0709 | 1.3547 | 3.849E-07 | 4.188E-05 | -0.1227 | 1.3235 | 1.127E-06 | 6.132E-05 | Undefined | Distribution of amino acid residues in the alpha-helices in thermophilic      |
| KUMS000104 | -0.0418 | 1.3516 | 8.822E-07 | 7.998E-05 | -0.1279 | 1.2912 | 1.425E-05 | 3.523E-04 | Undefined | Distribution of amino acid residues in the alpha-helices in mesophilic        |
| TAKK010101 | 0.0236  | 0.8217 | 2.736E-02 | 5.861E-02 | -0.0211 | 0.8568 | 6.307E-02 | 1.179E-01 | Undefined | Side-chain contribution to protein stability (kJ/mol) (Takano-Yutani, 2001)   |
| FODM020101 | 0.0902  | 0.7153 | 2.100E-03 | 8.420E-03 | 0.0805  | 0.7154 | 1.329E-03 | 5.784E-03 | Undefined | Propensity of amino acids within pi-helices (Fodje-Al-Karadaghi, 2002)        |
| NADH010101 | 0.0850  | 0.7551 | 2.578E-03 | 9.740E-03 | 0.0758  | 0.7368 | 6.084E-04 | 3.472E-03 | Undefined | Hydropathy scale based on self-information values in the two-state model (5%  |
| NADH010102 | 0.0658  | 0.7121 | 4.806E-04 | 3.005E-03 | 0.0478  | 0.6915 | 7.332E-05 | 8.864E-04 | Undefined | Hydropathy scale based on self-information values in the two-state model (9%  |
| NADH010103 | 0.0927  | 0.6822 | 1.255E-04 | 1.533E-03 | 0.0831  | 0.6515 | 1.192E-05 | 3.241E-04 | Undefined | Hydropathy scale based on self-information values in the two-state model (16% |
| NADH010104 | 0.0925  | 0.6378 | 7.376E-06 | 3.087E-04 | 0.0870  | 0.6344 | 1.955E-06 | 8.862E-05 | Undefined | Hydropathy scale based on self-information values in the two-state model (20% |
| NADH010105 | 0.0959  | 0.6712 | 6.128E-05 | 1.111E-03 | 0.0920  | 0.6780 | 3.768E-05 | 6.612E-04 | Undefined | Hydropathy scale based on self-information values in the two-state model (25% |
| NADH010106 | 0.1409  | 0.6490 | 2.140E-04 | 1.905E-03 | 0.1340  | 0.7071 | 1.233E-03 | 5.435E-03 | Undefined | Hydropathy scale based on self-information values in the two-state model (36% |
| NADH010107 | 0.1711  | 0.8796 | 2.214E-01 | 3.103E-01 | 0.1814  | 0.8960 | 2.783E-01 | 3.740E-01 | Undefined | Hydropathy scale based on self-information values in the two-state model (50% |
| MONM990201 | 0.0323  | 0.9153 | 3.720E-01 | 4.673E-01 | 0.0620  | 0.9021 | 2.706E-01 | 3.704E-01 | Undefined | Averaged turn propensities in a transmembrane helix (Monne et al., 1999)      |
| KOEP990101 | 0.1415  | 1.1411 | 3.822E-02 | 7.588E-02 | 0.1797  | 1.1244 | 4.631E-02 | 9.128E-02 | Undefined | Alpha-helix propensity derived from designed sequences (Koehl-Levitt, 1999)   |
| KOEP990102 | -0.1055 | 0.7301 | 2.304E-04 | 1.958E-03 | -0.1044 | 0.7654 | 8.233E-04 | 4.104E-03 | Undefined | Beta-sheet propensity derived from designed sequences (Koehl-Levitt, 1999)    |
| CEDJ970101 | -0.0624 | 1.1767 | 5.454E-03 | 1.630E-02 | -0.0782 | 1.1530 | 1.081E-02 | 2.962E-02 | Undefined | Composition of amino acids in extracellular proteins (percent) (Cedano et     |
| CEDJ970102 | -0.1082 | 1.2668 | 4.062E-05 | 7.893E-04 | -0.1081 | 1.2468 | 7.305E-05 | 8.864E-04 | Undefined | Composition of amino acids in anchored proteins (percent) (Cedano et al.,     |
| CEDJ970103 | -0.0718 | 1.2686 | 2.413E-04 | 2.020E-03 | -0.0806 | 1.2562 | 1.767E-04 | 1.457E-03 | Undefined | Composition of amino acids in membrane proteins (percent) (Cedano et al.,     |
| CEDJ970104 | -0.1194 | 1.2317 | 1.050E-03 | 5.438E-03 | -0.1188 | 1.2454 | 3.323E-04 | 2.260E-03 | Undefined | Composition of amino acids in intracellular proteins (percent) (Cedano et     |
| CEDJ970105 | -0.2147 | 0.9067 | 2.905E-01 | 3.877E-01 | -0.1825 | 1.0178 | 7.006E-01 | 7.731E-01 | Undefined | Composition of amino acids in nuclear proteins (percent) (Cedano et al.,      |
| FUKS010101 | -0.1139 | 0.8166 | 4.445E-02 | 8.581E-02 | -0.0747 | 0.8173 | 3.544E-02 | 7.387E-02 | Undefined | Surface composition of amino acids in intracellular proteins of thermophiles  |
| FUKS010102 | -0.1071 | 0.8970 | 3.426E-01 | 4.365E-01 | -0.0906 | 0.8485 | 1.163E-01 | 1.924E-01 | Undefined | Surface composition of amino acids in intracellular proteins of mesophiles    |
| FUKS010103 | -0.0376 | 0.7323 | 6.273E-04 | 3.630E-03 | -0.0341 | 0.8091 | 1.250E-02 | 3.300E-02 | Undefined | Surface composition of amino acids in extracellular proteins of mesophiles    |
| FUKS010104 | -0.1209 | 0.7885 | 3.505E-02 | 7.062E-02 | -0.1036 | 0.7575 | 9.278E-03 | 2.629E-02 | Undefined | Surface composition of amino acids in nuclear proteins (percent)              |
| FUKS010105 | -0.0121 | 1.1811 | 9.124E-03 | 2.364E-02 | -0.0546 | 1.1837 | 5.561E-03 | 1.739E-02 | Undefined | Interior composition of amino acids in intracellular proteins of thermophiles |
| FUKS010106 | -0.0208 | 1.1930 | 3.210E-03 | 1.098E-02 | -0.0698 | 1.1978 | 1.681E-03 | 6.981E-03 | Undefined | Interior composition of amino acids in intracellular proteins of mesophiles   |
| FUKS010107 | 0.0026  | 1.1219 | 6.242E-02 | 1.085E-01 | -0.0329 | 1.1362 | 3.255E-02 | 6.992E-02 | Undefined | Interior composition of amino acids in extracellular proteins of mesophiles   |
| FUKS010108 | -0.0623 | 1.1583 | 2.582E-02 | 5.618E-02 | -0.1007 | 1.0948 | 1.331E-01 | 2.123E-01 | Undefined | Interior composition of amino acids in nuclear proteins (percent)             |
| FUKS010109 | -0.0888 | 1.1564 | 7.769E-03 | 2.121E-02 | -0.1156 | 1.1974 | 6.454E-04 | 3.521E-03 | Undefined | Entire chain composition of amino acids in intracellular proteins of          |
| FUKS010110 | -0.0903 | 1.3326 | 3.425E-07 | 4.188E-05 | -0.1105 | 1.3625 | 8.100E-09 | 2.203E-06 | Undefined | Entire chain composition of amino acids in intracellular proteins of          |
| FUKS010111 | 0.0056  | 1.0217 | 6.808E-01 | 7.637E-01 | -0.0458 | 1.0647 | 2.957E-01 | 3.923E-01 | Undefined | Entire chain composition of amino acids in extracellular proteins of          |
| FUKS010112 | -0.0953 | 1.2614 | 1.960E-04 | 1.858E-03 | -0.1477 | 1.2650 | 1.003E-04 | 1.070E-03 | Undefined | Entire chain composition of amino acids in nuclear proteins (percent)         |
| AVBF000101 | 0.0275  | 0.7795 | 1.622E-02 | 3.922E-02 | 0.0200  | 0.8340 | 6.345E-02 | 1.182E-01 | Undefined | Screening coefficients gamma, local (Avbelj, 2000)                            |
| AVBF000102 | 0.0173  | 0.9365 | 5.567E-01 | 6.485E-01 | -0.0360 | 0.9168 | 3.811E-01 | 4.846E-01 | Undefined | Screening coefficients gamma, non-local (Avbelj, 2000)                        |
| AVBF000103 | 0.0421  | 1.1025 | 1.370E-01 | 2.117E-01 | -0.0038 | 0.9827 | 9.486E-01 | 9.556E-01 | Undefined | Slopes tripeptide, FDPB VFF neutral (Avbelj, 2000)                            |
| AVBF000104 | -0.0319 | 1.0779 | 3.125E-01 | 4.086E-01 | -0.0346 | 0.9828 | 9.085E-01 | 9.272E-01 | Undefined | Slopes tripeptides, LD VFF neutral (Avbelj, 2000)                             |

|            |         |        |           |           |         |        |           |           |           |                                                                                              |
|------------|---------|--------|-----------|-----------|---------|--------|-----------|-----------|-----------|----------------------------------------------------------------------------------------------|
| AVBF000105 | 0.0640  | 1.0356 | 5.315E-01 | 6.285E-01 | -0.0052 | 0.9484 | 5.827E-01 | 6.688E-01 | Undefined | Slopes tripeptide, FDPB VFF noside (Avbelj, 2000)                                            |
| AVBF000106 | 0.0747  | 0.9017 | 2.992E-01 | 3.950E-01 | 0.0389  | 0.8835 | 1.750E-01 | 2.594E-01 | Undefined | Slopes tripeptide FDPB VFF all (Avbelj, 2000)                                                |
| AVBF000107 | -0.0325 | 1.0041 | 8.143E-01 | 8.652E-01 | -0.0256 | 0.9778 | 8.587E-01 | 8.932E-01 | Undefined | Slopes tripeptide FDPB PARSE neutral (Avbelj, 2000)                                          |
| AVBF000108 | -0.0087 | 0.9800 | 9.901E-01 | 9.901E-01 | -0.0462 | 0.9003 | 3.207E-01 | 4.183E-01 | Undefined | Slopes dekaepetide, FDPB VFF neutral (Avbelj, 2000)                                          |
| AVBF000109 | -0.0550 | 0.8982 | 2.297E-01 | 3.204E-01 | -0.0915 | 0.8886 | 1.667E-01 | 2.502E-01 | Undefined | Slopes proteins, FDPB VFF neutral (Avbelj, 2000)                                             |
| YANJ020101 | 0.0264  | 0.9301 | 4.887E-01 | 9.070E-01 | 0.0457  | 0.9498 | 6.098E-01 | 6.868E-01 | Undefined | Side-chain conformation by gaussian evolutionary method (Yang et al., 2002)                  |
| MITSO20101 | 0.0647  | 0.9206 | 3.603E-01 | 4.548E-01 | 0.0825  | 0.9408 | 5.263E-01 | 6.184E-01 | Undefined | Amphiphilicity index (Mitaku et al., 2002)                                                   |
| TSAJ990101 | -0.0349 | 0.8604 | 5.211E-02 | 9.576E-02 | -0.0377 | 0.8922 | 1.198E-01 | 1.956E-01 | Undefined | Volumes including the crystallographic waters using the ProtOr (Tsai et al., 2002)           |
| TSAJ990102 | -0.0315 | 0.8464 | 2.927E-02 | 6.171E-02 | -0.0344 | 0.8986 | 1.389E-01 | 2.196E-01 | Undefined | Volumes not including the crystallographic waters using the ProtOr (Tsai et al., 2002)       |
| COSI940101 | 0.0276  | 0.9776 | 8.676E-01 | 9.024E-01 | 0.0321  | 1.0459 | 4.305E-01 | 5.311E-01 | Undefined | Electron-ion interaction potential values (Cosic, 1994)                                      |
| PONP930101 | 0.0310  | 0.7041 | 1.393E-04 | 1.579E-03 | 0.0274  | 0.6801 | 1.344E-05 | 3.483E-04 | Undefined | Hydrophobicity scales (Ponnuswamy, 1993)                                                     |
| WILM950101 | 0.0289  | 0.8154 | 2.774E-02 | 5.895E-02 | 0.0078  | 0.8107 | 1.742E-02 | 4.248E-02 | Undefined | Hydrophobicity coefficient in RP-HPLC, C18 with 0.1%TFA/MeCN/H2O (Wilce et al., 1993)        |
| WILM950102 | 0.0185  | 0.8077 | 2.455E-02 | 5.407E-02 | -0.0126 | 0.8685 | 1.177E-01 | 1.934E-01 | Undefined | Hydrophobicity coefficient in RP-HPLC, C8 with 0.1%TFA/MeCN/H2O (Wilce et al., 1993)         |
| WILM950103 | 0.0827  | 1.2308 | 1.734E-03 | 7.369E-03 | 0.0590  | 1.2190 | 1.855E-03 | 7.356E-03 | Undefined | Hydrophobicity coefficient in RP-HPLC, C4 with 0.1%TFA/MeCN/H2O (Wilce et al., 1993)         |
| WILM950104 | 0.0000  | 1.0103 | 7.357E-01 | 8.087E-01 | 0.0017  | 1.0113 | 7.342E-01 | 8.004E-01 | Undefined | Hydrophobicity coefficient in RP-HPLC, C18 with 0.1%TFA/2-PrOH/MeCN/H2O (Wilce et al., 1993) |
| KUHL950101 | -0.0774 | 0.8714 | 1.752E-01 | 2.582E-01 | -0.0471 | 0.7277 | 1.062E-03 | 4.853E-03 | Undefined | Hydrophobicity scale (Kuhn et al., 1995)                                                     |
| GUOD860101 | 0.0184  | 0.7997 | 1.646E-02 | 3.945E-02 | -0.0166 | 0.7884 | 7.338E-03 | 2.199E-02 | Undefined | Retention coefficient at pH 2 (Guo et al., 1986)                                             |
| JURD980101 | 0.0564  | 0.8506 | 5.603E-02 | 9.999E-02 | 0.0329  | 0.7422 | 4.532E-04 | 2.935E-03 | Undefined | Modified Kyte-Doolittle hydrophobicity scale (Juretic et al., 1998)                          |
| BASU050101 | 0.0423  | 0.7447 | 2.744E-03 | 9.913E-03 | 0.0275  | 0.6699 | 4.490E-05 | 7.020E-04 | Undefined | Interactivity scale obtained from the contact matrix (Bastolla et al., 2005)                 |
| BASU050102 | 0.0528  | 0.6736 | 3.033E-04 | 2.260E-03 | 0.0477  | 0.6511 | 4.499E-05 | 7.020E-04 | Undefined | Interactivity scale obtained by maximizing the mean of correlation                           |
| BASU050103 | 0.0708  | 0.7021 | 9.977E-05 | 1.324E-03 | 0.0624  | 0.6734 | 6.391E-06 | 2.045E-04 | Undefined | Interactivity scale obtained by maximizing the mean of correlation                           |
| SUYM030101 | 0.1069  | 0.8493 | 1.046E-01 | 1.694E-01 | 0.0951  | 0.8429 | 7.559E-02 | 1.353E-01 | Undefined | Linker propensity index (Suyama-Ohara, 2003)                                                 |
| PUNT030101 | -0.0248 | 0.8289 | 5.462E-02 | 9.839E-02 | -0.0022 | 0.8024 | 1.643E-02 | 4.102E-02 | Undefined | Knowledge-based membrane-propensity scale from 1D_Helix in MPtopo databases                  |
| PUNT030102 | -0.0428 | 0.7846 | 5.304E-03 | 1.614E-02 | -0.0003 | 0.7526 | 6.190E-04 | 3.472E-03 | Undefined | Knowledge-based membrane-propensity scale from 3D_Helix in MPtopo databases                  |
| GEOR030101 | -0.1057 | 1.0249 | 5.261E-01 | 6.236E-01 | -0.1216 | 1.0260 | 4.582E-01 | 5.539E-01 | Undefined | Linker propensity from all dataset (George-Heringa, 2003)                                    |
| GEOR030102 | -0.0937 | 0.9043 | 3.294E-01 | 4.250E-01 | -0.1109 | 0.9733 | 9.217E-01 | 9.355E-01 | Undefined | Linker propensity from 1-linker dataset (George-Heringa, 2003)                               |
| GEOR030103 | -0.0874 | 0.9847 | 9.501E-01 | 9.650E-01 | -0.1492 | 1.0060 | 8.280E-01 | 8.679E-01 | Undefined | Linker propensity from 2-linker dataset (George-Heringa, 2003)                               |
| GEOR030104 | -0.0985 | 1.2832 | 1.318E-04 | 1.533E-03 | -0.1549 | 1.2268 | 1.059E-03 | 4.853E-03 | Undefined | Linker propensity from 3-linker dataset (George-Heringa, 2003)                               |
| GEOR030105 | -0.0834 | 0.8144 | 5.773E-02 | 1.016E-01 | -0.0984 | 0.8613 | 1.568E-01 | 2.389E-01 | Undefined | Linker propensity from small dataset (linker length is less than six)                        |
| GEOR030106 | -0.1093 | 1.1634 | 2.439E-02 | 5.394E-02 | -0.1565 | 1.1476 | 2.696E-02 | 6.060E-02 | Undefined | Linker propensity from medium dataset (linker length is between six and 14)                  |
| GEOR030107 | -0.0449 | 0.8887 | 1.675E-01 | 2.489E-01 | -0.0459 | 0.8849 | 1.294E-01 | 2.076E-01 | Undefined | Linker propensity from long dataset (linker length is greater than 14)                       |
| GEOR030108 | -0.0761 | 1.2830 | 2.569E-04 | 2.055E-03 | -0.1529 | 1.2151 | 2.998E-03 | 1.094E-02 | Undefined | Linker propensity from helical (annotated by DSSP) dataset (George-Heringa, 2003)            |
| GEOR030109 | -0.0381 | 0.9946 | 9.046E-01 | 9.290E-01 | -0.0414 | 0.9116 | 3.813E-01 | 4.846E-01 | Undefined | Linker propensity from non-helical (annotated by DSSP) dataset                               |
| ZHOH040101 | 0.0688  | 0.7440 | 7.819E-03 | 2.121E-02 | 0.0603  | 0.6919 | 7.257E-04 | 3.796E-03 | Undefined | The stability scale from the knowledge-based atom-atom potential (Zhou-Zhou, 2004)           |
| ZHOH040102 | 0.0193  | 0.7678 | 6.533E-03 | 1.871E-02 | 0.0023  | 0.7252 | 7.484E-04 | 3.805E-03 | Undefined | The relative stability scale extracted from mutation experiments (Zhou-Zhou, 2004)           |
| ZHOH040103 | 0.0914  | 0.6703 | 8.260E-05 | 1.246E-03 | 0.0652  | 0.6600 | 2.535E-05 | 5.108E-04 | Undefined | Buriability (Zhou-Zhou, 2004)                                                                |
| BAEK050101 | 0.1005  | 0.6884 | 3.268E-04 | 2.297E-03 | 0.0913  | 0.6929 | 2.361E-04 | 1.784E-03 | Undefined | Linker index (Bae et al., 2005)                                                              |
| HARY940101 | -0.0042 | 0.7457 | 3.796E-04 | 2.594E-03 | -0.0057 | 0.8453 | 2.576E-02 | 5.864E-02 | Undefined | Mean volumes of residues buried in protein interiors (Harpaz et al., 1994)                   |
| PONJ960101 | 0.0063  | 0.7934 | 7.410E-03 | 2.073E-02 | -0.0063 | 0.8427 | 3.644E-02 | 7.556E-02 | Undefined | Average volumes of residues (Pontius et al., 1996)                                           |
| DIGM050101 | -0.1699 | 1.0005 | 7.814E-01 | 8.435E-01 | -0.1134 | 1.0161 | 6.442E-01 | 7.211E-01 | Undefined | Hydrostatic pressure asymmetry index, PAI (Di Giulio, 2005)                                  |
| WOLR790101 | 0.0311  | 0.8416 | 4.836E-02 | 9.148E-02 | 0.0031  | 0.8380 | 3.054E-02 | 6.671E-02 | Undefined | Hydrophobicity index (Wolfenden et al., 1979)                                                |
| OLSK800101 | 0.0480  | 0.8152 | 1.315E-02 | 3.228E-02 | 0.0189  | 0.8084 | 6.723E-03 | 2.066E-02 | Undefined | Average internal preferences (Olsen, 1980)                                                   |
| KIDA850101 | -0.0511 | 0.8144 | 3.444E-02 | 7.016E-02 | -0.0309 | 0.8056 | 1.866E-02 | 4.500E-02 | Undefined | Hydrophobicity-related index (Kidera et al., 1985)                                           |
| GUYH850102 | -0.0522 | 0.7115 | 3.227E-04 | 2.297E-03 | -0.0429 | 0.7109 | 1.661E-04 | 1.412E-03 | Undefined | Apparent partition energies calculated from Wertz-Scheraga index (Guy, 1985)                 |
| GUYH850103 | -0.0580 | 0.7308 | 1.556E-03 | 6.926E-03 | -0.0542 | 0.6994 | 1.455E-04 | 1.297E-03 | Undefined | Apparent partition energies calculated from Robson-Osguthorpe index (Guy, 1985)              |
| GUYH850104 | -0.0635 | 0.7226 | 1.346E-03 | 6.365E-03 | -0.0377 | 0.7221 | 8.109E-04 | 4.085E-03 | Undefined | Apparent partition energies calculated from Janin index (Guy, 1985)                          |
| GUYH850105 | -0.0983 | 0.7607 | 3.862E-03 | 1.272E-02 | -0.0521 | 0.7758 | 4.220E-03 | 1.400E-02 | Undefined | Apparent partition energies calculated from Chothia index (Guy, 1985)                        |
| ROSM880104 | 0.0234  | 0.8166 | 1.023E-02 | 2.592E-02 | -0.0001 | 0.8179 | 7.312E-03 | 2.199E-02 | Undefined | Hydropathies of amino acid side chains, neutral form (Roseman, 1988)                         |
| ROSM880105 | 0.0547  | 0.8136 | 5.106E-02 | 9.416E-02 | 0.0122  | 0.7809 | 1.189E-02 | 3.186E-02 | Undefined | Hydropathies of amino acid side chains, pi-values in pH 7.0 (Roseman, 1988)                  |
| JACR890101 | 0.0973  | 0.8357 | 8.161E-02 | 1.375E-01 | 0.0598  | 0.7570 | 4.988E-03 | 1.578E-02 | Undefined | Weights from the IFH scale (Jacobs-White, 1989)                                              |
| COWR900101 | 0.0125  | 0.7230 | 5.489E-04 | 3.355E-03 | -0.0127 | 0.7083 | 1.310E-04 | 1.271E-03 | Undefined | Hydrophobicity index, 3.0 pH (Cowan-Whittaker, 1990)                                         |
| BLAS910101 | 0.0605  | 0.8588 | 1.351E-01 | 2.107E-01 | 0.0355  | 0.7533 | 4.028E-03 | 1.361E-02 | Undefined | Scaled side chain hydrophobicity values (Black-Mould, 1991)                                  |
| CASG920101 | 0.0906  | 0.6838 | 4.257E-04 | 2.724E-03 | 0.0940  | 0.6691 | 1.098E-04 | 1.127E-03 | Undefined | Hydrophobicity scale from native protein structures (Casari-Sippel, 1992)                    |

|                   |         |        |           |           |         |        |           |           |           |
|-------------------|---------|--------|-----------|-----------|---------|--------|-----------|-----------|-----------|
| <b>CORJ870101</b> | 0.0820  | 0.7222 | 3.294E-04 | 2.297E-03 | 0.0842  | 0.6602 | 3.694E-06 | 1.256E-04 | Undefined |
| <b>CORJ870102</b> | 0.0444  | 0.8343 | 4.007E-02 | 7.842E-02 | 0.0435  | 0.7494 | 8.298E-04 | 4.104E-03 | Undefined |
| <b>CORJ870103</b> | 0.0186  | 0.7507 | 2.256E-03 | 8.831E-03 | 0.0221  | 0.7285 | 5.255E-04 | 3.249E-03 | Undefined |
| <b>CORJ870104</b> | 0.0299  | 0.7458 | 4.169E-03 | 1.337E-02 | 0.0210  | 0.7344 | 1.869E-03 | 7.356E-03 | Undefined |
| <b>CORJ870105</b> | 0.0226  | 0.7521 | 3.156E-03 | 1.087E-02 | -0.0218 | 0.7553 | 2.410E-03 | 9.169E-03 | Undefined |
| <b>CORJ870106</b> | 0.0274  | 0.7224 | 2.888E-03 | 1.022E-02 | -0.0062 | 0.7214 | 1.646E-03 | 6.940E-03 | Undefined |
| <b>CORJ870107</b> | 0.0294  | 0.7247 | 6.975E-04 | 3.872E-03 | -0.0060 | 0.7058 | 1.357E-04 | 1.271E-03 | Undefined |
| <b>CORJ870108</b> | -0.0219 | 0.7478 | 3.756E-03 | 1.246E-02 | 0.0018  | 0.6953 | 2.188E-04 | 1.725E-03 | Undefined |
| <b>MIYS990101</b> | -0.0361 | 0.7393 | 1.627E-03 | 7.026E-03 | -0.0147 | 0.7267 | 5.453E-04 | 3.284E-03 | Undefined |
| <b>MIYS990102</b> | -0.0390 | 0.7302 | 1.228E-03 | 5.912E-03 | -0.0170 | 0.7149 | 3.496E-04 | 2.348E-03 | Undefined |
| <b>MIYS990103</b> | -0.0542 | 0.6859 | 1.793E-04 | 1.774E-03 | -0.0381 | 0.6483 | 1.095E-05 | 3.134E-04 | Undefined |
| <b>MIYS990104</b> | -0.0791 | 0.6825 | 8.727E-05 | 1.246E-03 | -0.0545 | 0.6527 | 7.082E-06 | 2.140E-04 | Undefined |
| <b>MIYS990105</b> | -0.0573 | 0.7026 | 2.108E-04 | 1.905E-03 | -0.0518 | 0.7013 | 9.180E-05 | 9.988E-04 | Undefined |
| <b>ENGD860101</b> | -0.0856 | 0.8163 | 5.417E-02 | 9.829E-02 | -0.0019 | 0.7629 | 7.696E-03 | 2.288E-02 | Undefined |
| <b>FASG890101</b> | -0.0808 | 0.7064 | 1.324E-04 | 1.533E-03 | -0.0790 | 0.6921 | 3.075E-05 | 5.768E-04 | Undefined |

NNEIG index (Cornette et al., 1987)

SWEIG index (Cornette et al., 1987)

PRIFT index (Cornette et al., 1987)

PRILS index (Cornette et al., 1987)

ALTFT index (Cornette et al., 1987)

ALTLS index (Cornette et al., 1987)

TOTFT index (Cornette et al., 1987)

TOTLS index (Cornette et al., 1987)

Relative partition energies derived by the Bethe approximation

Optimized relative partition energies - method A (Miyazawa-Jernigan, 1999)

Optimized relative partition energies - method B (Miyazawa-Jernigan, 1999)

Optimized relative partition energies - method C (Miyazawa-Jernigan, 1999)

Optimized relative partition energies - method D (Miyazawa-Jernigan, 1999)

Hydrophobicity index (Engelman et al., 1986)

Hydrophobicity index (Fasman, 1989)
