# Supplementary material for: Protein corona formed on silver nanoparticles in blood plasma is highly selective and resistant to physicochemical changes of the solution
Source: Environ Sci Nano. 2019 Mar 18;6(4):1089–98. doi: 10.1039/c8en01054d (PMC6592156; doi:10.1039/c8en01054d)
Supplement: Supplementary file 2 [file EN-006-C8EN01054D-s002.xlsx]

## Sheet: pH
Uniprot Accession	GeneID	pH 4.9				pH 6.1				pH 6.8				pH 7.7				pH 8.9				Name	GOComponent	GOFunction	GOProcess	Coverage(%)	#Peptides	MW(Da)	pI	GRAVY	q-value
		Rep1	Rep2	Rep3	Control	Rep1	Rep2	Rep3	Control	Rep1	Rep2	Rep3	Control	Rep1	Rep2	Rep3	Control	Rep1	Rep2	Rep3	Control
P04196	HRG	9.02949	9.08669	8.71259	7.031	9.68952	10.3312	9.99377	7.31171	10.1697	9.36193	9.96093	7.08159	9.12742	9.32268	9.39766	6.99864	8.74478	8.90603	8.95419	7.28133	Histidine-rich glycoprotein	blood microparticle, cell surface, collagen-containing extracellular matrix, endolysosome, extracellular exosome, extracellular region, plasma membrane, platelet alpha granule lumen	cysteine-type endopeptidase inhibitor activity, heme binding, heparan sulfate proteoglycan binding, heparin binding, immunoglobulin binding, metal ion binding, serine-type endopeptidase inhibitor activity, signaling receptor binding, zinc ion binding	angiogenesis, antimicrobial humoral immune response mediated by antimicrobial peptide, chemotaxis, cytolysis in other organism, defense response to fungus, fibrinolysis, heme transport, negative regulation of angiogenesis, negative regulation of blood vessel endothelial cell migration, negative regulation of cell adhesion, negative regulation of cell adhesion mediated by integrin, negative regula…	72.9524	99	59540.9	7.07178	-0.956762	6.30512e-16
P01024	C3	9.57621	9.56096	9.35251	7.95853	8.3531	8.56799	8.58275	7.69351	8.68214	8.17654	8.72334	7.45878	8.77002	8.97139	9.09751	7.75299	9.02957	9.04212	9.14479	8.20707	Complement C3	azurophil granule lumen, blood microparticle, endoplasmic reticulum lumen, extracellular exosome, extracellular region, extracellular space, plasma membrane, protein-containing complex, secretory granule lumen	C5L2 anaphylatoxin chemotactic receptor binding, endopeptidase inhibitor activity, serine-type endopeptidase activity, signaling receptor binding	amyloid-beta clearance, cell surface receptor signaling pathway involved in cell-cell signaling, cellular protein metabolic process, complement activation, complement activation, alternative pathway, complement activation, classical pathway, fatty acid metabolic process, G protein-coupled receptor signaling pathway, immune response, inflammatory response, neutrophil degranulation, phagocytosis, e…	90.5592	298	187030	5.95068	-0.320265	6.30512e-16
P06396	GSN	8.54381	8.39673	8.28586	6.80586	7.63549	7.90687	7.7368	7.09836	7.83551	7.45548	7.79226	6.58791	7.74914	7.84769	8.07506	6.72885	8.652	8.55055	8.54715	7.0361	Gelsolin	actin cap, actin cytoskeleton, blood microparticle, cortical actin cytoskeleton, cytoplasm, cytosol, extracellular exosome, extracellular region, extracellular space, ficolin-1-rich granule lumen, focal adhesion, lamellipodium, myelin sheath, perinuclear region of cytoplasm, phagocytic vesicle, plasma membrane, podosome, ruffle, sarcoplasm, secretory granule lumen	actin binding, actin filament binding, calcium ion binding, myosin II binding	actin filament capping, actin filament polymerization, actin filament reorganization, actin filament severing, actin nucleation, aging, amyloid fibril formation, barbed-end actin filament capping, cellular protein metabolic process, cellular response to cadmium ion, cellular response to interferon-gamma, cilium assembly, hepatocyte apoptotic process, negative regulation of viral entry into host c…	40.5371	39	85644.2	5.8208	-0.414578	6.30512e-16
P03952	KLKB1	7.47492	7.50202	7.13832	6.38649	7.78593	8.43424	8.19236	6.34381	8.29872	7.75742	8.23001	6.0989	8.42771	8.64336	8.79231	6.34297	8.70558	8.79034	8.64258	6.62398	Plasma kallikrein	extracellular exosome, extracellular region, extracellular space, plasma membrane	serine-type endopeptidase activity	blood coagulation, intrinsic pathway, extracellular matrix disassembly, Factor XII activation, fibrinolysis, plasminogen activation, positive regulation of fibrinolysis, proteolysis, zymogen activation	78.9969	64	71322.8	7.96045	-0.263009	6.30512e-16
P21333	FLNA	7.5213	7.59587	7.289	6.70194	8.10822	8.48733	8.42691	7.53301	8.32089	7.97892	8.42777	6.82179	8.21026	8.43505	8.651	6.87503	8.57839	8.05331	8.67463	7.1708	Filamin-A	actin cytoskeleton, actin filament, apical dendrite, cell-cell junction, cortical cytoskeleton, cytoplasm, cytosol, dendritic shaft, extracellular exosome, extracellular region, focal adhesion, glutamatergic synapse, membrane, Myb complex, neuronal cell body, nucleolus, nucleus, perinuclear region of cytoplasm, plasma membrane, postsynapse, Z disc	actin filament binding, cadherin binding, Fc-gamma receptor I complex binding, G protein-coupled receptor binding, GTPase binding, ion channel binding, kinase binding, mu-type opioid receptor binding, potassium channel regulator activity, protein homodimerization activity, Rac GTPase binding, Ral GTPase binding, Rho GTPase binding, RNA binding, SMAD binding, small GTPase binding, transcription fa…	actin crosslink formation, actin cytoskeleton reorganization, adenylate cyclase-inhibiting dopamine receptor signaling pathway, cell junction assembly, cerebral cortex development, cilium assembly, cytoplasmic sequestering of protein, defense response to virus, establishment of protein localization, establishment of Sertoli cell barrier, formation of radial glial scaffolds, mitotic spindle assemb…	69.0593	188	280564	5.61572	-0.316698	6.30512e-16
P03951	F11	7.07174	6.8778	6.64264	6.70051	8.97767	9.36834	9.21273	6.55611	9.48896	8.7762	9.3437	6.63307	9.19892	9.32253	9.56871	6.78948	9.3416	9.47267	9.45105	6.75891	Coagulation factor XI	extracellular exosome, extracellular region, extracellular space, membrane, plasma membrane	heparin binding, identical protein binding, serine-type aminopeptidase activity, serine-type endopeptidase activity	blood coagulation, blood coagulation, intrinsic pathway, plasminogen activation, positive regulation of fibrinolysis	91.68	122	70063.6	7.83057	-0.26304	6.30512e-16
P00450	CP	9.24237	9.16308	8.96558	7.64127	7.58814	7.62447	7.54336	7.12921	7.74435	6.983	7.51075	6.88206	7.65201	7.71136	7.65604	7.20068	7.82361	8.04979	8.04418	7.55821	Ceruloplasmin	blood microparticle, endoplasmic reticulum lumen, extracellular exosome, extracellular region, extracellular space, lysosomal membrane	chaperone binding, copper ion binding, ferroxidase activity, oxidoreductase activity, oxidizing metal ions	cellular iron ion homeostasis, cellular protein metabolic process, copper ion transport, post-translational protein modification	72.9577	98	122128	5.30811	-0.535962	6.30512e-16
P02671	FGA	10.4103	10.3366	10.0151	8.68746	10.1131	10.3982	10.5457	8.12765	10.0843	9.95747	10.3644	7.94417	10.1184	10.2788	10.6487	8.15178	10.1321	9.49055	10.3639	8.38616	Fibrinogen alpha chain	blood microparticle, cell cortex, cell surface, collagen-containing extracellular matrix, endoplasmic reticulum lumen, external side of plasma membrane, extracellular exosome, extracellular region, extracellular space, extracellular vesicle, fibrinogen complex, plasma membrane, platelet alpha granule, platelet alpha granule lumen, synapse	extracellular matrix structural constituent, metal ion binding, signaling receptor binding, structural molecule activity	adaptive immune response, blood coagulation, blood coagulation, common pathway, blood coagulation, fibrin clot formation, cell-matrix adhesion, cellular protein metabolic process, cellular protein-containing complex assembly, extracellular matrix organization, fibrinolysis, induction of bacterial agglutination, innate immune response, negative regulation of blood coagulation, common pathway, nega…	79.2148	255	94914.4	5.58838	-0.821709	6.30512e-16
P02675	FGB	10.3705	10.458	10.1802	8.67593	10.2212	10.3329	10.4924	8.18051	10.0389	9.81083	10.3912	7.97127	10.1722	10.2674	10.4972	8.09888	10.0162	9.38832	10.1757	8.3526	Fibrinogen beta chain	blood microparticle, cell cortex, cell surface, collagen-containing extracellular matrix, endoplasmic reticulum, external side of plasma membrane, extracellular exosome, extracellular region, extracellular space, extracellular vesicle, fibrinogen complex, plasma membrane, platelet alpha granule, platelet alpha granule lumen, synapse	chaperone binding, extracellular matrix structural constituent, signaling receptor binding, structural molecule activity	adaptive immune response, blood coagulation, blood coagulation, fibrin clot formation, cell-matrix adhesion, cellular protein-containing complex assembly, cellular response to interleukin-1, cellular response to leptin stimulus, extracellular matrix organization, fibrinolysis, induction of bacterial agglutination, innate immune response, negative regulation of endothelial cell apoptotic process, …	90.224	272	55892.3	8.13135	-0.758452	6.30512e-16
P00742	F10	8.5691	8.5967	8.41769	7.2496	7.0869	6.48472	6.58338	6.04501	5.88177	4.99078	5.13632	5.98494	5.7991	5.55874	5.4627	6.06676	6.51843	6.66895	6.59158	6.24366	Coagulation factor X	endoplasmic reticulum lumen, extracellular region, extracellular space, Golgi lumen, intrinsic component of external side of plasma membrane, plasma membrane	calcium ion binding, phospholipid binding, serine-type endopeptidase activity	blood coagulation, blood coagulation, extrinsic pathway, ER to Golgi vesicle-mediated transport, positive regulation of cell migration, positive regulation of protein kinase B signaling	46.3115	25	54696.5	5.5542	-0.579713	6.30512e-16
P00488	F13A1	8.56012	8.59577	8.42311	6.29639	7.82276	7.90646	8.10082	6.15314	7.43543	7.22392	7.80393	6.0344	7.47052	7.59859	7.92496	5.95459	7.70354	7.40157	7.8627	5.98561	Coagulation factor XIII A chain	blood microparticle, collagen-containing extracellular matrix, extracellular region, platelet alpha granule lumen	metal ion binding, protein-glutamine gamma-glutamyltransferase activity	blood coagulation, blood coagulation, fibrin clot formation, cytokine-mediated signaling pathway, peptide cross-linking, platelet degranulation	75.9563	61	83214.6	5.64307	-0.391393	6.30512e-16
P00738	HP	8.1888	8.04784	7.79883	7.69536	7.79941	8.38223	8.44615	7.982	8.7598	8.11275	8.58642	7.58342	8.49611	8.51075	8.70313	7.88471	8.82534	8.96448	8.99704	8.17447	Haptoglobin	blood microparticle, endocytic vesicle lumen, extracellular exosome, extracellular region, extracellular space, haptoglobin-hemoglobin complex, specific granule lumen, tertiary granule lumen	antioxidant activity, hemoglobin binding, serine-type endopeptidase activity	acute inflammatory response, acute-phase response, defense response, defense response to bacterium, negative regulation of hydrogen peroxide catabolic process, negative regulation of oxidoreductase activity, neutrophil degranulation, positive regulation of cell death, receptor-mediated endocytosis, response to hydrogen peroxide, response to organic substance	48.5222	28	45176.6	6.10791	-0.421182	6.30512e-16
P02730	SLC4A1	5.85887	6.81223	6.70915	5.69031	7.40191	7.58042	7.72109	7.25718	7.92433	7.30187	7.78135	6.93149	7.74636	7.77622	7.84994	6.81606	8.07398	8.24531	8.02112	7.63917	Band 3 anion transport protein	basolateral plasma membrane, blood microparticle, cortical cytoskeleton, extracellular exosome, integral component of membrane, integral component of plasma membrane, plasma membrane, Z disc	anion transmembrane transporter activity, anion:anion antiporter activity, ankyrin binding, bicarbonate transmembrane transporter activity, chloride transmembrane transporter activity, inorganic anion exchanger activity, protein homodimerization activity, protein membrane anchor	anion transport, bicarbonate transport, cellular ion homeostasis, chloride transport, regulation of intracellular pH	26.2349	29	101727	4.85693	0.213282	6.30512e-16
P00747	PLG	9.64847	9.64247	9.3417	8.00582	8.63387	8.94657	8.80632	7.29079	8.9454	8.3117	8.98142	6.94024	8.53025	8.60175	8.96913	7.19593	8.63936	8.61427	8.71206	7.34477	Plasminogen	blood microparticle, cell surface, collagen-containing extracellular matrix, extracellular exosome, extracellular region, extracellular space, extrinsic component of external side of plasma membrane, other organism cell membrane, plasma membrane, platelet alpha granule lumen	apolipoprotein binding, chaperone binding, endopeptidase activity, enzyme binding, kinase binding, proteasome core complex binding, protein antigen binding, protein domain specific binding, serine-type endopeptidase activity, serine-type peptidase activity, signaling receptor binding	blood coagulation, cellular protein metabolic process, extracellular matrix disassembly, fibrinolysis, interaction with symbiont, interaction with symbiont via secreted substance involved in symbiotic interaction, modification by host of symbiont morphology or physiology via secreted substance, negative regulation of cell proliferation, negative regulation of cell-cell adhesion mediated by cadher…	80.7407	133	90510.2	6.84619	-0.687531	6.30512e-16
P02751	FN1	9.73331	9.72924	9.57453	7.98474	9.04304	9.21669	9.28921	7.16457	8.75292	8.59509	9.16799	7.07347	8.80173	8.91777	9.26522	7.18062	9.00638	8.44046	9.1415	7.42528	Fibronectin	apical plasma membrane, basement membrane, blood microparticle, collagen-containing extracellular matrix, endoplasmic reticulum lumen, endoplasmic reticulum-Golgi intermediate compartment, extracellular exosome, extracellular matrix, extracellular region, extracellular space, fibrinogen complex, platelet alpha granule lumen	chaperone binding, collagen binding, disordered domain specific binding, enzyme binding, extracellular matrix structural constituent, heparin binding, identical protein binding, integrin binding, peptidase activator activity, protease binding, protein C-terminus binding, proteoglycan binding, signaling receptor binding	acute-phase response, angiogenesis, calcium-independent cell-matrix adhesion, cell adhesion, cell-substrate junction assembly, cellular protein metabolic process, cytokine-mediated signaling pathway, endodermal cell differentiation, extracellular matrix organization, integrin activation, interaction with other organism via secreted substance involved in symbiotic interaction, interaction with sym…	72.2129	344	262460	5.30811	-0.542582	6.30512e-16
P08697	SERPINF2	9.02341	8.97963	8.70606	7.44411	7.47833	7.86063	7.64036	6.86648	7.67183	7.25185	7.52643	6.57423	7.34949	7.66544	7.73264	6.65798	7.74843	7.66838	7.85185	6.93683	Alpha-2-antiplasmin	blood microparticle, cell surface, collagen-containing extracellular matrix, extracellular exosome, extracellular region, extracellular space, fibrinogen complex, platelet alpha granule lumen	endopeptidase inhibitor activity, protease binding, protein homodimerization activity, serine-type endopeptidase inhibitor activity	acute-phase response, blood vessel morphogenesis, collagen fibril organization, fibrinolysis, negative regulation of endopeptidase activity, negative regulation of fibrinolysis, negative regulation of plasminogen activation, platelet degranulation, positive regulation of cell differentiation, positive regulation of cell-cell adhesion mediated by cadherin, positive regulation of collagen biosynthe…	66.3951	34	54531.1	5.82764	-0.124033	6.30512e-16
P07437	TUBB		6.50398		6.17743	6.90799	7.16762	7.34459	6.59567	6.93911	6.68331	7.44506	6.2118	6.31459	7.10751	7.69686	6.24122	7.22883	6.39654	7.41867	6.2559	Tubulin beta chain	azurophil granule lumen, cell body, cytoplasm, cytoplasmic ribonucleoprotein granule, cytoskeleton, extracellular exosome, extracellular region, membrane raft, microtubule, nuclear envelope lumen, nucleus	GTP binding, GTPase activating protein binding, GTPase activity, MHC class I protein binding, protein domain specific binding, protein-containing complex binding, structural constituent of cytoskeleton, structural molecule activity, ubiquitin protein ligase binding	cell division, cellular process, ciliary basal body-plasma membrane docking, cytoskeleton-dependent intracellular transport, G2/M transition of mitotic cell cycle, microtubule cytoskeleton organization, microtubule-based process, mitotic cell cycle, natural killer cell mediated cytotoxicity, neutrophil degranulation, regulation of G2/M transition of mitotic cell cycle, regulation of synapse organ…	15.991	6	49639	4.53564	-0.347973	6.30512e-16
P01591	JCHAIN	7.24394	7.00915	6.85686	6.62005	7.46788	7.98921	7.76986	7.36332	8.17738	7.62694	7.94447	7.07366	7.85942	8.0617	8.26531	7.19451	8.20866	8.347	8.31766	7.69163	Immunoglobulin J chain	blood microparticle, dimeric IgA immunoglobulin complex, extracellular exosome, extracellular region, extracellular space, monomeric IgA immunoglobulin complex, pentameric IgM immunoglobulin complex, secretory dimeric IgA immunoglobulin complex, secretory IgA immunoglobulin complex	antigen binding, IgA binding, immunoglobulin receptor binding, protein binding, bridging, protein homodimerization activity	adaptive immune response, antibacterial humoral response, glomerular filtration, immune response, innate immune response, leukocyte migration, positive regulation of protein oligomerization, positive regulation of respiratory burst, receptor-mediated endocytosis, retina homeostasis	65.4088	12	18087	4.8501	-0.337736	6.30512e-16
P04114	APOB	9.63718	9.66773	9.45071	8.14358	8.44121	8.70336	9.01626	7.78816	9.12973	8.61998	9.12577	7.33599	8.99685	9.04102	9.29608	7.751	9.3724	9.10662	9.47489	8.31626	Apolipoprotein B-100	chylomicron, chylomicron remnant, clathrin-coated endocytic vesicle membrane, cytoplasm, cytosol, early endosome, endocytic vesicle lumen, endoplasmic reticulum exit site, endoplasmic reticulum lumen, endoplasmic reticulum membrane, endosome lumen, endosome membrane, extracellular exosome, extracellular region, extracellular space, high-density lipoprotein particle, intermediate-density lipoprote…	cholesterol transporter activity, heparin binding, lipase binding, low-density lipoprotein particle receptor binding, phospholipid binding	artery morphogenesis, cellular protein metabolic process, cellular response to prostaglandin stimulus, cellular response to tumor necrosis factor, cholesterol efflux, cholesterol homeostasis, cholesterol metabolic process, cholesterol transport, chylomicron assembly, chylomicron remnant clearance, chylomicron remodeling, fertilization, flagellated sperm motility, in utero embryonic development, l…	77.7778	676	515283	6.57275	-0.296428	6.30512e-16
Q92954	PRG4	5.80184			6.09057		6.42618	5.68952	5.24635	6.48714	5.83453	6.70824	5.08003	7.82421	8.04179	8.31719	5.63002	8.89055	8.95073	8.8635	5.99107	Proteoglycan 4	collagen-containing extracellular matrix	extracellular matrix structural constituent conferring compression resistance, polysaccharide binding, scavenger receptor activity	cell proliferation, immune response	22.151	46	150968	9.94971	-1.03041	6.30512e-16
O00602	FCN1					7.20911	7.87615	7.62828		7.98408	7.21302	7.97509	4.6803	7.68275	7.47624	8.09413		8.105	8.07641	8.02841	5.54108	Ficolin-1	collagen trimer, collagen-containing extracellular matrix, extracellular region, extrinsic component of external side of plasma membrane, ficolin-1-rich granule lumen, secretory granule lumen	carbohydrate binding, G protein-coupled receptor binding, metal ion binding, serine-type endopeptidase activity, sialic acid binding, signaling pattern recognition receptor activity	cell surface pattern recognition receptor signaling pathway, complement activation, complement activation, lectin pathway, G protein-coupled receptor signaling pathway, negative regulation of viral entry into host cell, neutrophil degranulation, positive regulation of interleukin-8 secretion, protein localization to cell surface, recognition of apoptotic cell	36.5031	9	35056.1	6.40186	-0.42454	6.4116e-16
P00751	CFB	8.69229	8.4241	8.22903	7.16625	7.34693	7.61012	7.41626	6.9968	7.68029	7.11137	7.56308	6.59713	7.45075	7.46231	7.6852	6.95512	7.79014	7.9569	7.99334	7.10081	Complement factor B	blood microparticle, extracellular exosome, extracellular region, extracellular space, plasma membrane	complement binding, serine-type endopeptidase activity	complement activation, complement activation, alternative pathway, regulation of complement activation	56.8063	51	85478.5	6.62744	-0.501047	7.34682e-16
P02790	HPX	7.99666	8.05043	7.80945	7.23108	7.24636	7.96048	8.01269	7.26978	8.22561	7.59636	8.07587	7.01483	8.01492	7.86889	7.95981	7.35029	8.11693	8.27842	8.1426	7.5215	Hemopexin	blood microparticle, collagen-containing extracellular matrix, endocytic vesicle lumen, extracellular exosome, extracellular region, extracellular space	heme transporter activity, metal ion binding	cellular iron ion homeostasis, heme metabolic process, heme transport, hemoglobin metabolic process, positive regulation of humoral immune response mediated by circulating immunoglobulin, positive regulation of immunoglobulin production, positive regulation of interferon-gamma-mediated signaling pathway, positive regulation of tyrosine phosphorylation of STAT protein, proteolysis, receptor-mediat…	66.0173	30	51643.3	6.55225	-0.434199	7.74513e-16
P04004	VTN	9.27242	9.07972	8.82037	7.84397	8.14646	8.63561	8.46212	7.60916	8.71639	8.19039	8.66152	7.25725	8.72657	9.06492	9.14923	7.49782	9.55234	9.6413	9.54528	7.69004	Vitronectin	alphav-beta3 integrin-vitronectin complex, basement membrane, blood microparticle, collagen-containing extracellular matrix, endoplasmic reticulum, extracellular exosome, extracellular region, extracellular space, Golgi lumen, intracellular membrane-bounded organelle, rough endoplasmic reticulum lumen	collagen binding, extracellular matrix binding, extracellular matrix structural constituent, heparin binding, identical protein binding, integrin binding, polysaccharide binding, scavenger receptor activity	cell adhesion, cell adhesion mediated by integrin, cell migration, cell proliferation, cell-matrix adhesion, endodermal cell differentiation, extracellular matrix organization, immune response, liver regeneration, negative regulation of blood coagulation, negative regulation of endopeptidase activity, oligodendrocyte differentiation, positive regulation of cell-substrate adhesion, positive regula…	61.2971	48	54271.2	5.39697	-0.723431	8.13634e-16
P02679	FGG	10.3199	10.2939	10.0962	8.64721	10.2357	10.4251	10.5693	8.15687	10.1356	9.94258	10.4981	8.04678	10.2593	10.2753	10.5891	8.26993	10.1579	9.52824	10.3351	8.45636	Fibrinogen gamma chain	blood microparticle, cell surface, collagen-containing extracellular matrix, endoplasmic reticulum lumen, external side of plasma membrane, extracellular exosome, extracellular region, extracellular space, fibrinogen complex, plasma membrane, platelet alpha granule, platelet alpha granule lumen	cell adhesion molecule binding, extracellular matrix structural constituent, metal ion binding, protein homodimerization activity, signaling receptor binding, structural molecule activity	blood coagulation, blood coagulation, fibrin clot formation, cell-matrix adhesion, cellular protein metabolic process, cellular protein-containing complex assembly, cellular response to interleukin-1, cellular response to interleukin-6, extracellular matrix organization, fibrinolysis, negative regulation of endothelial cell apoptotic process, negative regulation of extrinsic apoptotic signaling p…	88.521	192	51478.9	5.19189	-0.5883	8.60785e-16
P04275	VWF	8.13981	7.86914	7.71548	6.58982	7.29444	7.3588	7.54636	6.21702	7.11508	7.03064	7.53343	5.72273	7.2424	7.38148	7.67157	6.47471	7.29286	6.91514	7.41579	6.87056	von Willebrand factor	collagen-containing extracellular matrix, endoplasmic reticulum, extracellular exosome, extracellular region, platelet alpha granule, platelet alpha granule lumen, Weibel-Palade body	chaperone binding, collagen binding, extracellular matrix structural constituent, identical protein binding, immunoglobulin binding, integrin binding, protease binding, protein homodimerization activity, protein N-terminus binding	blood coagulation, blood coagulation, intrinsic pathway, cell adhesion, cell-substrate adhesion, extracellular matrix organization, hemostasis, platelet activation, platelet degranulation, protein homooligomerization, response to wounding	38.642	84	309058	5.10303	-0.207856	9.36533e-16
P02768	ALB	9.32391	9.3401	9.10996	8.74084	9.08816	9.60926	9.78682	9.13776	10.0101	9.30537	9.79348	8.71106	9.83635	9.77916	9.93931	9.03948	10.0018	10.1585	10.2121	9.4149	Serum albumin	blood microparticle, endoplasmic reticulum, endoplasmic reticulum lumen, extracellular exosome, extracellular region, extracellular space, Golgi apparatus, myelin sheath, nucleus, platelet alpha granule lumen, protein-containing complex	antioxidant activity, chaperone binding, copper ion binding, DNA binding, drug binding, fatty acid binding, identical protein binding, pyridoxal phosphate binding, toxic substance binding	cellular protein metabolic process, cellular response to starvation, hemolysis by symbiont of host erythrocytes, high-density lipoprotein particle remodeling, maintenance of mitochondrion location, negative regulation of apoptotic process, negative regulation of programmed cell death, platelet degranulation, post-translational protein modification, receptor-mediated endocytosis, retina homeostasis	94.2529	246	69321.5	5.84814	-0.353859	1.01967e-15
P08519	LPA	8.44817	8.43319	8.34044	7.06442	7.29401	7.7336	7.75977	7.07268	8.33571	7.39804	7.96603	6.30959	7.92183	7.81541	8.26173	6.83586	8.52648	8.19312	8.49475	7.41656	Apolipoprotein(a)	extracellular region, plasma lipoprotein particle	apolipoprotein binding, endopeptidase inhibitor activity, fibronectin binding, heparin binding, serine-type endopeptidase activity	blood circulation, lipid metabolic process, lipid transport, low-density lipoprotein particle remodeling	54.1996	88	500995	5.48584	-0.725044	1.13185e-15
P01042	KNG1	9.20303	9.06211	8.80931	7.70426	9.38727	9.88007	9.55238	7.57148	9.85657	9.28492	9.72689	7.45225	9.58964	9.77174	9.95015	7.60686	9.83528	9.94301	9.85554	7.72029	Kininogen-1	blood microparticle, collagen-containing extracellular matrix, endoplasmic reticulum lumen, extracellular exosome, extracellular region, extracellular space, plasma membrane, platelet alpha granule lumen	cysteine-type endopeptidase inhibitor activity, heparin binding, signaling receptor binding, zinc ion binding	antimicrobial humoral immune response mediated by antimicrobial peptide, blood coagulation, intrinsic pathway, cellular protein metabolic process, G protein-coupled receptor signaling pathway, inflammatory response, killing of cells of other organism, negative regulation of blood coagulation, negative regulation of cell adhesion, negative regulation of endopeptidase activity, negative regulation …	56.677	96	71912.1	6.3335	-0.757298	1.2588e-15
P12259	F5	8.00851	7.93135	7.78522	6.40828	7.07589	7.42998	7.36032	6.56444	7.39463	7.04152	7.45008	5.99416	7.67961	7.84261	8.00165	6.22567	8.2759	8.28564	8.26887	6.81522	Coagulation factor V	COPII-coated ER to Golgi transport vesicle, endoplasmic reticulum lumen, endoplasmic reticulum-Golgi intermediate compartment membrane, extracellular region, extracellular space, extracellular vesicle, Golgi membrane, membrane, plasma membrane, platelet alpha granule lumen	copper ion binding	blood circulation, blood coagulation, cellular protein metabolic process, COPII vesicle coating, ER to Golgi vesicle-mediated transport, platelet degranulation, post-translational protein modification	30.6205	75	251546	5.59521	-0.598741	1.47021e-15
P02774	GC	8.07895	8.06547	7.75723	7.04293	8.18524	8.54681	8.46863	7.69592	8.483	8.0903	8.43975	7.01131	8.35093	8.50259	8.66673	7.15011	8.59286	8.22612	8.731	7.39165	Vitamin D-binding protein	blood microparticle, cytosol, extracellular exosome, extracellular region, extracellular space, lysosomal lumen	actin binding, calcidiol binding, vitamin D binding, vitamin transmembrane transporter activity	vitamin D metabolic process, vitamin transport	65.6118	39	52882.9	5.12354	-0.336287	1.70355e-15
P08514	ITGA2B	7.46846	7.51576	7.29824	5.83112	7.82343	8.11189	8.22672	7.32832	8.02439	7.70982	8.28302	6.55913	8.08325	8.19747	8.50845	6.16449	8.18918	7.53123	8.30779	6.64327	Integrin alpha-IIb	blood microparticle, cell surface, external side of plasma membrane, extracellular exosome, focal adhesion, integrin complex, plasma membrane, platelet alpha granule membrane	extracellular matrix binding, fibrinogen binding, identical protein binding, metal ion binding	cell-matrix adhesion, extracellular matrix organization, integrin-mediated signaling pathway, platelet aggregation, platelet degranulation, positive regulation of leukocyte migration, regulation of megakaryocyte differentiation	48.4119	50	113306	5.00049	-0.107796	1.927e-15
P09871	C1S	8.82827	8.75966	8.63248	7.28519	7.30418	7.22993	7.32454	6.64896	7.12137	6.62718	7.20951	6.37701	7.37004	7.34929	7.73057	6.6433	8.09822	8.10894	8.01313	6.76438	Complement C1s subcomponent	blood microparticle, extracellular region, extracellular space	calcium ion binding, identical protein binding, serine-type endopeptidase activity	complement activation, complement activation, classical pathway, innate immune response, regulation of complement activation	60.0291	48	76634.8	4.604	-0.37064	2.376e-15
P05160	F13B	7.4273	8.00694	7.81948	5.97499	8.23256	8.38633	8.43209	5.8671	7.6977	7.48517	7.89949	5.35191	7.43795	7.4628	7.81861	5.81325	6.59415	6.77199	7.0639	5.70325	Coagulation factor XIII B chain	extracellular region		blood coagulation, blood coagulation, fibrin clot formation, negative regulation of cellular protein catabolic process	65.053	46	75461.2	5.95068	-0.551437	2.63437e-15
P19823	ITIH2	8.49925	8.56149	8.40869	7.1912	7.34427	7.70262	7.59309	7.01155	7.71376	7.10459	7.62322	6.78156	7.58482	7.9738	7.79597	7.06674	7.78771	7.97648	8.09998	7.33953	Inter-alpha-trypsin inhibitor heavy chain H2	blood microparticle, collagen-containing extracellular matrix, endoplasmic reticulum lumen, extracellular exosome, extracellular region	endopeptidase inhibitor activity, serine-type endopeptidase inhibitor activity	cellular protein metabolic process, hyaluronan metabolic process, post-translational protein modification	37.8436	39	106397	6.38818	-0.292706	2.88439e-15
Q13790	APOF	7.90286	7.77543	7.74942	6.51907	6.86765	6.46265	6.33666	6.4852	6.44319	5.95171	6.04679	5.88344	6.2691		6.2917	5.842	6.83367	6.78438	6.70338	6.42066	Apolipoprotein F	extracellular space, high-density lipoprotein particle, low-density lipoprotein particle	cholesterol binding, lipid transporter activity, signaling receptor binding	cholesterol metabolic process, lipid metabolic process, lipid transport	29.4479	4	35377	5.26025	-0.0714724	3.26568e-15
P00736	C1R	8.24482	8.32436	8.14926	6.62038	6.75542	7.26393	7.28924	6.41068	7.11562	6.4939	6.94887	5.94784	7.25415	7.22269	7.5848	6.25545	7.99663	8.04808	7.9022	6.41937	Complement C1r subcomponent	blood microparticle, extracellular exosome, extracellular region, extracellular space	calcium ion binding, serine-type endopeptidase activity, serine-type peptidase activity	complement activation, complement activation, classical pathway, immune response, innate immune response, regulation of complement activation, zymogen activation	61.2766	47	80066.8	5.75928	-0.509929	3.71273e-15
P00739	HPR	8.37821	8.37848	8.13014	7.00228	7.49178	7.85825	7.76696	6.95486	7.9929	7.43436	7.93863	6.78637	7.80076	7.58812	8.05513	6.93793	8.10115	8.14377	8.17272	7.35921	Haptoglobin-related protein	blood microparticle, extracellular exosome, extracellular region, extracellular space, spherical high-density lipoprotein particle	hemoglobin binding, serine-type endopeptidase activity	acute inflammatory response, positive regulation of cell death, receptor-mediated endocytosis, response to organic substance	44.2529	16	39004.7	6.65479	-0.306897	4.22407e-15
P00740	F9	7.90887	7.91288	7.71453	6.62988	6.43965	6.20721	6.19471	5.57887	6.27916		5.59846	5.44289	6.03601	5.81787	6.13647	5.80588	6.1949	6.49496	6.60071	5.9059	Coagulation factor IX	endoplasmic reticulum lumen, extracellular exosome, extracellular region, extracellular space, Golgi lumen, plasma membrane	calcium ion binding, endopeptidase activity, serine-type endopeptidase activity	blood coagulation, blood coagulation, intrinsic pathway, ER to Golgi vesicle-mediated transport, proteolysis, zymogen activation	38.8286	18	51745	5.15771	-0.377223	4.96178e-15
Q14520	HABP2	8.24501	8.24427	8.047	6.96761	6.51064	6.44855	6.62315	6.09261	6.55271	5.48606	6.21934	5.79021	6.47172	7.65729	6.44334	6.3073	7.05828	7.35714	7.21447	6.35548	Hyaluronan-binding protein 2	extracellular region, extracellular space	calcium ion binding, glycosaminoglycan binding, serine-type endopeptidase activity	cell adhesion, proteolysis	42.5	27	62630.4	6.06689	-0.545	5.69613e-15
P26927	MST1	5.9607		6.72497	5.62226	6.76376	6.99088	6.39556	5.67273	6.85229	6.68864	6.7268	5.58682	7.21989	7.43869	7.54818	5.68114	8.46069	8.51358	8.40819	5.80497	Hepatocyte growth factor-like protein	extracellular region, extracellular space	receptor tyrosine kinase binding, serine-type endopeptidase activity	hepatocyte growth factor receptor signaling pathway, negative regulation of gluconeogenesis, positive regulation of mammary gland epithelial cell proliferation, regulation of cAMP-dependent protein kinase activity, regulation of macrophage chemotaxis	66.1041	65	80267.5	7.36572	-0.610689	6.57995e-15
P01031	C5	8.07857	8.18244	8.07417	6.59509	6.9479	7.08617	7.26444	6.46183	7.02699	6.60523	7.07589	6.10107	7.0641	7.22526	7.33094	6.4459	7.57517	7.70716	7.65522	6.71034	Complement C5	extracellular exosome, extracellular region, extracellular space, membrane attack complex	chemokine activity, endopeptidase inhibitor activity, signaling receptor binding	activation of MAPK activity, cell surface receptor signaling pathway, chemotaxis, complement activation, alternative pathway, complement activation, classical pathway, cytolysis, G protein-coupled receptor signaling pathway, in utero embryonic development, inflammatory response, negative regulation of macrophage chemotaxis, positive regulation of angiogenesis, positive regulation of chemokine sec…	53.8186	86	188186	6.06689	-0.176372	7.43047e-15
Q9Y490	TLN1	7.54433	7.60639	7.3364	6.34061	7.89584	8.1987	8.18823	7.26359	8.05307	7.748	8.26968	6.58267	8.22116	8.33711	8.48961	6.29151	8.68979	8.64426	8.69991	6.58217	Talin-1	cell surface, cytoskeleton, cytosol, extracellular exosome, extracellular region, focal adhesion, ruffle, ruffle membrane	actin filament binding, cadherin binding, integrin binding, LIM domain binding, phosphatidylinositol binding, phosphatidylserine binding, structural constituent of cytoskeleton, vinculin binding	cell-cell junction assembly, cell-substrate junction assembly, cortical actin cytoskeleton organization, cytoskeletal anchoring at plasma membrane, integrin activation, integrin-mediated signaling pathway, IRE1-mediated unfolded protein response, muscle contraction, platelet aggregation, platelet degranulation, viral process	66.9421	178	269599	5.67041	-0.240378	8.46141e-15
Q14624	ITIH4	8.2934	8.38071	8.25511	6.97752	7.05725	7.66664	7.82193	7.15606	7.88846	7.18114	7.70581	6.7522	7.61493	7.78649	7.85021	6.86126	7.79275	8.09863	8.05779	7.26032	Inter-alpha-trypsin inhibitor heavy chain H4	blood microparticle, collagen-containing extracellular matrix, extracellular exosome, extracellular region, plasma membrane, platelet dense granule lumen	endopeptidase inhibitor activity, serine-type endopeptidase inhibitor activity	acute-phase response, hyaluronan metabolic process, platelet degranulation, response to cytokine	47.2043	45	103293	6.51807	-0.315484	9.53929e-15
Q13642	FHL1					6.113	6.94449	6.55644	5.92874	7.0091	6.36975	6.6833	4.77523	6.86988	7.13468	7.19819		7.21765	7.15066	7.24327		Four and a half LIM domains protein 1	cytoplasm, cytosol, focal adhesion, nucleus, plasma membrane	ion channel binding, metal ion binding	animal organ morphogenesis, cell differentiation, muscle organ development, negative regulation of cell growth, negative regulation of G1/S transition of mitotic cell cycle, negative regulation of G2/M transition of mitotic cell cycle, positive regulation of potassium ion transport, regulation of membrane depolarization, regulation of potassium ion transmembrane transporter activity	42.4149	12	36238.6	8.92432	-0.511455	1.08993e-14
P27169	PON1	9.20545	9.19015	8.92152	7.8547	7.97218	8.04026	8.25914	7.23332	7.86861	7.3896	7.9607	7.01845	7.73068	7.69104	7.91917	7.17727	7.85593	7.81423	8.03079	7.37957	Serum paraoxonase/arylesterase 1	blood microparticle, extracellular exosome, extracellular region, extracellular space, high-density lipoprotein particle, intracellular membrane-bounded organelle, spherical high-density lipoprotein particle	acyl-L-homoserine-lactone lactonohydrolase activity, aryldialkylphosphatase activity, arylesterase activity, calcium ion binding, phospholipid binding, protein homodimerization activity	aromatic compound catabolic process, carboxylic acid catabolic process, cholesterol metabolic process, lipoxygenase pathway, organophosphate catabolic process, phosphatidylcholine metabolic process, positive regulation of binding, positive regulation of cholesterol efflux, positive regulation of transporter activity, response to fatty acid, response to fluoride, response to nutrient levels, respo…	80.8451	40	39706.2	4.88428	-0.0912676	1.23989e-14
Q9BXR6	CFHR5	7.69035	7.45267	7.28507	5.80806	6.22691	6.32155	6.14197	5.60146	6.945	6.48907	6.94181	5.08016	7.39626	7.46256	7.73189	5.16541	8.30098	8.3471	8.11314	5.71707	Complement factor H-related protein 5	extracellular region, protein-containing complex	protein heterodimerization activity, protein homodimerization activity	complement activation, alternative pathway, negative regulation of protein binding, positive regulation of cytolysis, regulation of complement activation	60.4569	33	64377.1	6.67529	-0.449912	1.43463e-14
P02788	LTF	6.62182		5.63864	7.02527	5.71453	6.17064	5.72035	6.60032	6.80883	5.81422	6.7893	6.58619	7.32582	7.62398	7.64858	6.97882	8.17093	8.31254	8.18364	6.9542	Lactotransferrin	cell surface, cytoplasm, extracellular exosome, extracellular region, extracellular space, nucleus, other organism cell membrane, phagocytic vesicle lumen, protein-containing complex, secretory granule, specific granule, specific granule lumen, tertiary granule lumen	cysteine-type endopeptidase inhibitor activity, DNA binding, heparin binding, iron ion binding, lipopolysaccharide binding, protein serine/threonine kinase activator activity, serine-type endopeptidase activity	antibacterial humoral response, antifungal humoral response, antimicrobial humoral immune response mediated by antimicrobial peptide, antimicrobial humoral response, bone morphogenesis, cellular protein metabolic process, defense response to Gram-negative bacterium, defense response to Gram-positive bacterium, humoral immune response, innate immune response, innate immune response in mucosa, kill…	61.1268	52	78131.9	7.87158	-0.337042	1.63393e-14
P02656	APOC3	9.24357	9.13328	9.02631	8.43361	8.12182	8.71816	8.61162	8.36965	8.90024	7.96349	8.71189	8.39086	8.72232	8.77284	8.9827	8.48234	9.15002	9.14339	9.40355	8.68742	Apolipoprotein C-III	chylomicron, collagen-containing extracellular matrix, early endosome, extracellular exosome, extracellular region, extracellular space, intermediate-density lipoprotein particle, spherical high-density lipoprotein particle, very-low-density lipoprotein particle	cholesterol binding, enzyme regulator activity, high-density lipoprotein particle receptor binding, lipase inhibitor activity, phospholipid binding	cholesterol efflux, cholesterol homeostasis, chylomicron assembly, chylomicron remnant clearance, chylomicron remodeling, G protein-coupled receptor signaling pathway, high-density lipoprotein particle remodeling, lipoprotein metabolic process, negative regulation of cholesterol import, negative regulation of fatty acid biosynthetic process, negative regulation of high-density lipoprotein particl…	58.5859	11	10845.5	4.98682	-0.0858586	1.83467e-14
P02765	AHSG	8.29868	7.97447	7.79688	7.78004	7.60628	8.29527	8.06836	7.81863	8.30503	7.69123	8.23546	7.54857	8.00523	7.93409	8.26029	7.89262	8.44903	8.63309	8.68386	8.1062	Alpha-2-HS-glycoprotein	blood microparticle, collagen-containing extracellular matrix, endoplasmic reticulum lumen, extracellular exosome, extracellular region, extracellular space, Golgi apparatus, platelet alpha granule lumen, secretory granule lumen	cysteine-type endopeptidase inhibitor activity, kinase inhibitor activity	acute-phase response, cellular protein metabolic process, negative regulation of bone mineralization, negative regulation of endopeptidase activity, negative regulation of insulin receptor signaling pathway, neutrophil degranulation, ossification, pinocytosis, platelet degranulation, positive regulation of phagocytosis, post-translational protein modification, regulation of bone mineralization, r…	38.4196	15	39315.7	5.30127	-0.189646	2.24874e-14
P01023	A2M	7.95463	7.79501	7.54785	7.11895	7.50164	7.81335	7.90544	7.31282	8.04912	7.4471	7.99613	6.99252	7.878	7.86073	8.09861	7.27283	8.16708	8.30631	8.3038	7.48528	Alpha-2-macroglobulin	blood microparticle, collagen-containing extracellular matrix, cytosol, extracellular exosome, extracellular region, platelet alpha granule lumen	calcium-dependent protein binding, enzyme binding, growth factor binding, GTPase activator activity, interleukin-1 binding, interleukin-8 binding, protease binding, serine-type endopeptidase inhibitor activity, signaling receptor binding, tumor necrosis factor binding	blood coagulation, intrinsic pathway, extracellular matrix disassembly, negative regulation of complement activation, lectin pathway, platelet degranulation, regulation of small GTPase mediated signal transduction, stem cell differentiation	58.2768	83	163188	5.99854	-0.195047	2.47825e-14
P01857	IGHG1	8.60112	8.58063	8.39827	8.23589	9.00393	9.26964	9.38985	8.4853	9.42443	8.88293	9.41484	8.1693	9.41095	9.30245	9.61758	8.49979	9.5181	9.60147	9.62605	8.72102	Immunoglobulin heavy constant gamma 1	blood microparticle, external side of plasma membrane, extracellular exosome, extracellular region, extracellular space, immunoglobulin complex, circulating	antigen binding, immunoglobulin receptor binding, serine-type endopeptidase activity	B cell receptor signaling pathway, complement activation, complement activation, classical pathway, cytokine-mediated signaling pathway, defense response to bacterium, Fc-gamma receptor signaling pathway involved in phagocytosis, innate immune response, phagocytosis, engulfment, phagocytosis, recognition, positive regulation of B cell activation, regulation of complement activation	54.8485	34	36083.2	8.05615	-0.428182	2.75574e-14
P02766	TTR	8.79214	8.90414	8.63475	7.35592	7.78937	8.08515	8.14054	6.9534	8.10583	7.34435	7.8725	6.15671	7.88907	8.01945	7.8196	6.96427	7.82846	7.94072	8.05549	7.36637	Transthyretin	azurophil granule lumen, extracellular exosome, extracellular region, extracellular space, protein-containing complex	hormone activity, identical protein binding, protein heterodimerization activity, thyroid hormone binding	cellular protein metabolic process, extracellular matrix organization, neutrophil degranulation, retinoid metabolic process, retinol metabolic process, thyroid hormone transport	77.551	18	15877	5.3833	-0.0285714	3.06071e-14
P05546	SERPIND1	9.13267	9.27146	8.99069	7.59642	7.575	7.49267	7.4026	6.79869	7.3507	6.96544	7.25654	6.5525	7.2576	7.23097	7.45244	6.74785	7.42082	7.7113	7.76072	6.97681	Heparin cofactor 2	endoplasmic reticulum lumen, extracellular exosome, extracellular region, extracellular space	endopeptidase inhibitor activity, heparin binding, serine-type endopeptidase inhibitor activity	blood coagulation, cellular protein metabolic process, chemotaxis, negative regulation of endopeptidase activity, post-translational protein modification	57.7154	38	57034.2	6.42236	-0.235671	3.35558e-14
P00734	F2	9.23645	9.27443	9.06502	7.94772	7.77773	7.64006	7.78248	7.05899	7.61516	7.17115	7.58715	6.91742	7.57223	7.43916	7.67437	7.1879	7.79461	7.90556	7.95879	7.31495	Prothrombin	blood microparticle, endoplasmic reticulum lumen, extracellular exosome, extracellular region, extracellular space, Golgi lumen, plasma membrane	calcium ion binding, enzyme activator activity, growth factor activity, heparin binding, lipopolysaccharide binding, serine-type endopeptidase activity, signaling receptor binding, thrombospondin receptor activity	acute-phase response, antimicrobial humoral immune response mediated by antimicrobial peptide, blood coagulation, blood coagulation, intrinsic pathway, cell surface receptor signaling pathway, cellular protein metabolic process, cytolysis by host of symbiont cells, ER to Golgi vesicle-mediated transport, fibrinolysis, G protein-coupled receptor signaling pathway, multicellular organism developmen…	57.5563	58	69992.1	5.49951	-0.539228	3.83809e-14
P05062	ALDOB	7.87778	7.8668	7.60879		6.85231	7.2883	7.23826		7.2581	6.78088	7.2243		7.43813	7.45069	7.66871		7.79291	7.86294	7.88018	5.39633	Fructose-bisphosphate aldolase B	centriolar satellite, cytosol, extracellular exosome, microtubule organizing center	ATPase binding, cytoskeletal protein binding, fructose binding, fructose-1-phosphate aldolase activity, fructose-bisphosphate aldolase activity, identical protein binding	canonical glycolysis, fructose 1,6-bisphosphate metabolic process, fructose catabolic process to hydroxyacetone phosphate and glyceraldehyde-3-phosphate, fructose metabolic process, gluconeogenesis, glycolytic process, NADH oxidation, positive regulation of ATPase activity, vacuolar proton-transporting V-type ATPase complex assembly	59.3407	19	39448.1	7.6665	-0.226648	4.33979e-14
P14618	PKM	7.16069	7.07719	6.90359	6.75982	7.01561	7.24703	7.09446	6.80074	7.20608	6.98786	7.37975	6.52804	7.09383	7.29227	7.50116	6.65395	7.5023	7.62814	7.66555	6.71567	Pyruvate kinase PKM	cilium, collagen-containing extracellular matrix, cytoplasm, cytosol, extracellular exosome, extracellular region, extracellular vesicle, ficolin-1-rich granule lumen, mitochondrion, myelin sheath, nucleus, pyruvate kinase complex, secretory granule lumen, vesicle	ADP binding, ATP binding, cadherin binding, identical protein binding, kinase activity, magnesium ion binding, MHC class II protein complex binding, potassium ion binding, pyruvate kinase activity, RNA binding, thyroid hormone binding	animal organ regeneration, canonical glycolysis, cellular response to insulin stimulus, glycolytic process, liver development, neutrophil degranulation, positive regulation of sprouting angiogenesis, programmed cell death, protein homotetramerization, response to gravity, response to hypoxia, response to muscle inactivity, response to nutrient, skeletal muscle tissue regeneration	52.7307	24	57900	7.63232	-0.12806	4.85259e-14
P0C0L5	C4B	8.25891	8.22164	8.06095	6.75846	7.81742	8.15159	7.92759	7.25892	8.25944	7.7347	8.24399	6.77219	8.45194	8.50127	8.76836	7.02584	9.02157	9.0103	8.7937	7.60773	Complement C4-B	axon, blood microparticle, cell junction, dendrite, extracellular exosome, extracellular region, extracellular space, other organism cell, plasma membrane, synapse	carbohydrate binding, complement binding, endopeptidase inhibitor activity, serine-type endopeptidase activity	complement activation, complement activation, classical pathway, detection of molecule of bacterial origin, inflammatory response, innate immune response, opsonization, positive regulation of apoptotic cell clearance, regulation of complement activation	4.98853	9	192631	6.83936	-0.253383	5.53258e-14
P19827	ITIH1	8.3005	8.205	8.11251	7.03596	6.99623	7.27561	7.15457	6.84169	7.37488	6.75242	7.21172	6.54722	7.20127	7.51835	7.32601	6.84237	7.52539	7.7661	7.84273	7.01206	Inter-alpha-trypsin inhibitor heavy chain H1	blood microparticle, collagen-containing extracellular matrix, extracellular exosome, extracellular region	calcium ion binding, serine-type endopeptidase inhibitor activity	hyaluronan metabolic process	42.1515	37	101326	6.30615	-0.281559	6.30673e-14
P08603	CFH	7.99497	8.16603	8.17756	7.03232	7.39168	7.8581	7.70035	7.03617	7.76513	7.31122	7.72197	6.60605	7.57265	7.65436	7.82497	6.99799	8.00375	8.09832	8.12578	7.18333	Complement factor H	blood microparticle, extracellular exosome, extracellular region, extracellular space	heparan sulfate proteoglycan binding, heparin binding	complement activation, complement activation, alternative pathway, regulation of complement activation, viral process	61.4947	82	139005	6.15576	-0.603006	7.1961e-14
Q96PD5	PGLYRP2	8.19865	8.10386	7.79715	6.74365	6.65423	6.95147	6.40923	6.49353	6.84655	6.0357	6.6949	6.07875	6.99166	6.95652	7.00039	6.47842	7.08494	7.354	7.41546	6.62462	N-acetylmuramoyl-L-alanine amidase	extracellular exosome, extracellular region, extracellular space, intracellular, membrane	N-acetylmuramoyl-L-alanine amidase activity, peptidoglycan binding, peptidoglycan receptor activity, zinc ion binding	antimicrobial humoral response, defense response to Gram-positive bacterium, detection of bacterium, growth of symbiont in host, innate immune response, negative regulation of interferon-gamma production, negative regulation of natural killer cell differentiation involved in immune response, peptide amidation, peptidoglycan catabolic process, regulation of inflammatory response	33.8542	17	62177.9	7.20166	-0.128993	8.24038e-14
P16157	ANK1		5.0715	5.21429		6.39283	6.98237	7.0252	6.69329	7.40119	6.80293	7.3839	6.48937	7.11742	7.20252	7.3412	6.31641	7.49846	7.6343	7.54312	7.06615	Ankyrin-1	axolemma, axon initial segment, basolateral plasma membrane, cytoplasmic side of plasma membrane, cytoskeleton, cytosol, M band, membrane, nucleus, plasma membrane, postsynaptic membrane, sarcolemma, sarcoplasmic reticulum, spectrin-associated cytoskeleton, Z disc	ATPase binding, cytoskeletal adaptor activity, enzyme binding, ion channel binding, protein phosphatase binding, spectrin binding, structural constituent of cytoskeleton, structural molecule activity	cytoskeleton organization, ER to Golgi vesicle-mediated transport, exocytosis, maintenance of epithelial cell apical/basal polarity, positive regulation of organelle organization, protein localization to plasma membrane, signal transduction	45.0824	64	206137	5.57471	-0.378416	9.48174e-14
P04003	C4BPA	8.00111	7.99627	7.77599	7.29021	8.03309	8.51518	8.38	7.57344	8.45101	7.8684	8.44027	7.22649	8.45249	8.41998	8.73871	7.35099	8.93056	8.91433	8.81946	7.66196	C4b-binding protein alpha chain	blood microparticle, extracellular region, extracellular space, other organism cell, plasma membrane	RNA binding	complement activation, classical pathway, innate immune response, negative regulation of complement activation, classical pathway, positive regulation of protein catabolic process, regulation of complement activation, regulation of opsonization	75.5444	63	66989.4	6.92139	-0.476717	1.07392e-13
Q9H4B7	TUBB1	5.96564	6.78661	6.65097		7.58063	7.93362	7.95132	7.13428	7.76399	7.43529	7.99854	6.15616	7.9305	7.9904	8.19151	5.70528	8.05472	7.1908	8.12017	6.23239	Tubulin beta-1 chain	cytoplasm, extracellular exosome, microtubule	GTP binding, GTPase activity, structural constituent of cytoskeleton	microtubule cytoskeleton organization, microtubule-based process, mitotic cell cycle, spindle assembly	54.3237	23	50294.6	4.84326	-0.242794	1.23599e-13
O14791	APOL1	8.68991	8.50387	8.26261	7.21043	6.84689	6.91959	6.77742	6.5358	7.24705	6.2343	6.72372	6.48939	6.96817	7.17689	7.14289	6.37111	7.40592	7.60115	7.5393	6.88124	Apolipoprotein L1	blood microparticle, endoplasmic reticulum lumen, extracellular region, extracellular space, high-density lipoprotein particle, intrinsic component of membrane, very-low-density lipoprotein particle	chloride channel activity, lipid binding	cellular protein metabolic process, chloride transmembrane transport, cholesterol metabolic process, cytolysis, innate immune response, killing of cells of other organism, lipid transport, lipoprotein metabolic process, post-translational protein modification, receptor-mediated endocytosis	64.5729	37	43946.9	5.45166	-0.239196	1.42187e-13
P02753	RBP4	6.2662	6.73729	6.49081	6.55855	6.807	6.97298	7.0311	6.6762	7.2034	6.06527	6.84819	5.91524	7.18737	6.55355	6.76234	6.6825	7.31202	7.54238	7.51881	6.92792	Retinol-binding protein 4	cytosol, extracellular exosome, extracellular region, extracellular space, protein-containing complex	protein heterodimerization activity, retinal binding, retinol binding, retinol transmembrane transporter activity	cardiac muscle tissue development, embryonic organ morphogenesis, embryonic retina morphogenesis in camera-type eye, embryonic skeletal system development, eye development, female genitalia morphogenesis, gluconeogenesis, glucose homeostasis, heart development, heart trabecula formation, lung development, maintenance of gastrointestinal epithelium, negative regulation of cardiac muscle cell proli…	79.1045	13	22995.3	5.61572	-0.433333	1.61023e-13
P18206	VCL	6.99503	6.8533	6.52461	6.21305	6.81984	7.44241	7.38259	6.60852	7.33183	6.87368	7.38639	5.95866	7.22827	7.40444	7.64903	5.8478	7.59805	7.09236	7.6473	6.13868	Vinculin	adherens junction, brush border, cell, cell-cell adherens junction, cell-cell junction, cell-substrate junction, costamere, cytoskeleton, cytosol, extracellular exosome, extracellular region, extracellular vesicle, fascia adherens, ficolin-1-rich granule lumen, focal adhesion, inner dense plaque of desmosome, membrane raft, outer dense plaque of desmosome, plasma membrane, podosome, protein-conta…	actin binding, alpha-catenin binding, beta-catenin binding, cadherin binding, dystroglycan binding, structural molecule activity, ubiquitin protein ligase binding	adherens junction assembly, apical junction assembly, axon extension, cell adhesion, cell-matrix adhesion, epithelial cell-cell adhesion, lamellipodium assembly, morphogenesis of an epithelium, muscle contraction, negative regulation of cell migration, neutrophil degranulation, platelet aggregation, platelet degranulation, protein localization to cell surface	51.4109	51	123722	5.31494	-0.405467	1.79858e-13
P07996	THBS1	7.59748	7.50805	7.41354	5.87037	7.69471	7.89799	7.79626	6.99541	7.74003	7.31341	7.94809	6.29909	7.72838	7.97158	8.16903	5.51991	8.00209	7.63874	8.06341	6.49364	Thrombospondin-1	cell surface, collagen-containing extracellular matrix, endoplasmic reticulum, endoplasmic reticulum lumen, external side of plasma membrane, extracellular exosome, extracellular matrix, extracellular region, extracellular space, fibrinogen complex, platelet alpha granule, platelet alpha granule lumen, sarcoplasmic reticulum, secretory granule	calcium ion binding, collagen V binding, extracellular matrix structural constituent, fibrinogen binding, fibroblast growth factor binding, fibronectin binding, heparin binding, identical protein binding, integrin binding, laminin binding, low-density lipoprotein particle binding, phosphatidylserine binding, proteoglycan binding, transforming growth factor beta binding	activation of MAPK activity, behavioral response to pain, cell adhesion, cell cycle arrest, cell migration, cellular response to growth factor stimulus, cellular response to heat, cellular response to tumor necrosis factor, chronic inflammatory response, engulfment of apoptotic cell, extracellular matrix organization, immune response, inflammatory response, negative regulation of angiogenesis, ne…	44.6154	58	129300	4.40576	-0.718889	2.01353e-13
P02787	TF	7.58963	7.67741	7.50188	7.07765	7.84712	8.41139	8.42926	7.71536	8.7816	8.03125	8.64618	7.2092	8.66067	8.56401	8.67179	7.46412	8.72962	8.82112	8.87763	7.88992	Serotransferrin	apical plasma membrane, basal part of cell, basal plasma membrane, blood microparticle, cell surface, clathrin-coated pit, clathrin-coated vesicle membrane, cytoplasmic vesicle, early endosome, endocytic vesicle, endoplasmic reticulum lumen, endosome membrane, extracellular exosome, extracellular region, extracellular space, extrinsic component of external side of plasma membrane, HFE-transferrin…	ferric iron binding, ferric iron transmembrane transporter activity, ferrous iron binding, iron chaperone activity, transferrin receptor binding	cellular iron ion homeostasis, cellular protein metabolic process, cellular response to iron ion, iron ion homeostasis, membrane organization, platelet degranulation, positive regulation of receptor-mediated endocytosis, post-translational protein modification, regulation of iron ion import, regulation of protein stability, retina homeostasis, transferrin transport	68.3381	89	77013.6	6.70264	-0.336246	2.23188e-13
P48059	LIMS1	6.06512	5.66088	5.19859		6.68087	7.27073	7.20352	6.41458	7.17494	6.7324	7.23969	5.5681	6.95386	7.26567	7.55988	5.50859	7.43964	7.02536	7.48223	5.85319	LIM and senescent cell antigen-like-containing domain protein 1	cell-cell junction, cytosol, focal adhesion, perinuclear region of cytoplasm, plasma membrane, protein-containing complex	protein kinase binding, zinc ion binding	cell aging, cell junction assembly, cellular response to transforming growth factor beta stimulus, establishment of protein localization, negative regulation of transcription, DNA-templated, positive regulation of cell-substrate adhesion, positive regulation of focal adhesion assembly, positive regulation of gene expression, positive regulation of GTPase activity, positive regulation of NIK/NF-ka…	64.3077	21	37225.8	7.76221	-0.343385	2.52538e-13
P05556	ITGB1		4.64818			6.50472	7.01934	7.05829	6.10027	6.80474	6.49946	6.99496	5.20066	6.92652	7.00467	7.24573		7.06785	6.526	7.21105		Integrin beta-1	cell surface, cleavage furrow, cytoplasm, dendritic spine, external side of plasma membrane, extracellular exosome, filopodium, focal adhesion, glial cell projection, glutamatergic synapse, integral component of synaptic membrane, integrin alpha1-beta1 complex, integrin alpha10-beta1 complex, integrin alpha11-beta1 complex, integrin alpha2-beta1 complex, integrin alpha3-beta1 complex, integrin al…	actin binding, cadherin binding, cell adhesion molecule binding, collagen binding involved in cell-matrix adhesion, coreceptor activity, fibronectin binding, integrin binding, laminin binding, metal ion binding, protease binding, protein heterodimerization activity, protein-containing complex binding, virus receptor activity	axon extension, B cell differentiation, basement membrane organization, calcium-independent cell-matrix adhesion, cardiac muscle cell differentiation, cell adhesion mediated by integrin, cell fate specification, cell migration, cell migration involved in sprouting angiogenesis, cell projection organization, cell-cell adhesion mediated by integrin, cell-matrix adhesion, cell-substrate adhesion, ce…	22.4311	13	88357	5.05518	-0.403509	2.8262e-13
P06732	CKM	7.80077	7.81398	7.58829	6.30693	5.9417	6.80161	6.61242	5.8738	6.81673	6.21206	7.2748	5.69104	6.56238	6.72134	6.68739	5.64012	7.01925	7.19962	7.08794	5.65761	Creatine kinase M-type	cytosol, extracellular space	ATP binding, creatine kinase activity	creatine metabolic process, phosphocreatine biosynthetic process	59.0551	20	43073.9	6.82568	-0.589764	3.18743e-13
P02745	C1QA	6.31299	6.02251	5.96856	6.30229	6.78594	7.3255	7.20477	7.04733	7.44706	6.65202	7.36683	6.47705	8.59731	8.43797	8.73952	6.90077	9.18545	9.18976	9.11721	7.23611	Complement C1q subcomponent subunit A	collagen trimer, collagen-containing extracellular matrix, complement component C1 complex, extracellular region	serine-type endopeptidase activity	cell-cell signaling, complement activation, complement activation, classical pathway, innate immune response, regulation of complement activation, response to iron ion	41.2245	15	26000.2	9.40967	-0.380816	3.56484e-13
Q13418	ILK	6.47468	6.38219	5.95231		6.82575	7.28543	7.2458	6.56317	7.30756	6.92754	7.48557	5.74183	7.2563	7.60802	7.72726		7.58153	7.00569	7.58509	5.502	Integrin-linked protein kinase	cell junction, cell-cell junction, costamere, cytosol, dendritic shaft, focal adhesion, lamellipodium, membrane, neuronal cell body, nucleoplasm, plasma membrane, protein-containing complex, sarcomere, stress fiber, terminal bouton	ATP binding, integrin binding, protein kinase binding, protein serine/threonine kinase activity, SH3 domain binding	branching involved in ureteric bud morphogenesis, cell aging, cell cycle arrest, cell junction assembly, cell proliferation, cell-matrix adhesion, establishment or maintenance of epithelial cell apical/basal polarity, fibroblast migration, integrin-mediated signaling pathway, MAPK cascade, myelin assembly, myelination in peripheral nervous system, negative regulation of cardiac muscle cell apopto…	54.4248	25	51385.9	7.89893	-0.411947	3.94771e-13
P49747	COMP	6.95881	6.74592	6.7219	5.41841																	Cartilage oligomeric matrix protein	extracellular exosome, extracellular matrix, extracellular region, extracellular space, protein-containing complex	BMP binding, calcium ion binding, collagen binding, extracellular matrix structural constituent, heparan sulfate proteoglycan binding, heparin binding, integrin binding, protease binding, proteoglycan binding	animal organ morphogenesis, animal organ senescence, apoptotic process, artery morphogenesis, BMP signaling pathway, bone mineralization, chondrocyte development, chondrocyte proliferation, collagen fibril organization, extracellular matrix organization, growth plate cartilage development, limb development, multicellular organism aging, multicellular organism growth, muscle fiber development, mus…	44.9141	18	82807.6	4.01611	-0.730251	4.33493e-13
P04406	GAPDH	6.80303	6.83382	6.94203	7.26676	6.94131	7.28897	6.93857	6.94885	7.19231	7.05712	7.3276	6.93498	7.10292	7.39726	7.40811	7.03047	7.56768	7.4908	7.58337	7.0568	Glyceraldehyde-3-phosphate dehydrogenase	cytoplasm, cytosol, extracellular exosome, GAIT complex, intracellular membrane-bounded organelle, lipid droplet, membrane, microtubule cytoskeleton, nuclear membrane, nucleus, perinuclear region of cytoplasm, plasma membrane, ribonucleoprotein complex, vesicle	aspartic-type endopeptidase inhibitor activity, disordered domain specific binding, glyceraldehyde-3-phosphate dehydrogenase (NAD+) (phosphorylating) activity, identical protein binding, microtubule binding, NAD binding, NADP binding, peptidyl-cysteine S-nitrosylase activity	antimicrobial humoral immune response mediated by antimicrobial peptide, canonical glycolysis, cellular response to interferon-gamma, defense response to fungus, gluconeogenesis, glycolytic process, killing by host of symbiont cells, killing of cells of other organism, microtubule cytoskeleton organization, negative regulation of endopeptidase activity, negative regulation of translation, neuron …	64.7761	22	36030.4	8.65771	-0.107761	4.8274e-13
P62937	PPIA	6.82521	6.82107	6.72968	6.49476	4.90386	6.46024	5.68817	6.34462	6.72104	6.60008		6.32633	6.6939	6.66525	7.0606	6.56173	7.00059	6.97499	6.97577	6.6175	Peptidyl-prolyl cis-trans isomerase A	cytosol, extracellular exosome, extracellular region, extracellular space, ficolin-1-rich granule lumen, focal adhesion, membrane, mitochondrion, nucleus, protein-containing complex, secretory granule lumen, vesicle	cyclosporin A binding, peptidyl-prolyl cis-trans isomerase activity, RNA binding, unfolded protein binding, virion binding	entry into host cell, establishment of integrated proviral latency, fusion of virus membrane with host plasma membrane, interleukin-12-mediated signaling pathway, leukocyte migration, lipid droplet organization, neutrophil degranulation, positive regulation of protein secretion, positive regulation of viral genome replication, protein folding, protein peptidyl-prolyl isomerization, regulation of …	53.3333	8	18000.9	7.72119	-0.316364	5.31413e-13
P13671	C6	7.4575	7.48154	7.16418	6.1355	6.85295	7.23756	7.26009	6.27637	7.18759	6.8551	7.1665	6.04933	7.20399	7.34778	7.35246	6.32146	7.67718	7.79736	7.74063	6.50757	Complement component C6	extracellular exosome, extracellular region, membrane attack complex		complement activation, complement activation, classical pathway, cytolysis, in utero embryonic development, innate immune response, positive regulation of activation of membrane attack complex, positive regulation of angiogenesis, regulation of complement activation	39.9358	26	104718	6.31982	-0.594218	5.82286e-13
Q13103	SPP2	6.83753	6.74871	6.66318	6.05923					5.54174					6.20494			7.37295	7.63241	7.43467		Secreted phosphoprotein 24	collagen-containing extracellular matrix, endoplasmic reticulum lumen, extracellular region, platelet dense granule lumen	endopeptidase inhibitor activity	bone remodeling, cellular protein metabolic process, platelet degranulation, post-translational protein modification, skeletal system development	24.1706	4	24321.8	8.28174	-0.400948	6.3322e-13
P01877	IGHA2	8.57484	8.57595	8.36241	7.82378	8.34827	8.66049	8.73484	7.89294	8.7828	8.30052	8.75817	7.67013	8.65927	8.62701	8.91412	7.97527	8.74245	8.8769	8.92119	8.17638	Immunoglobulin heavy constant alpha 2	blood microparticle, external side of plasma membrane, extracellular exosome, extracellular region, extracellular space, immunoglobulin complex, circulating, monomeric IgA immunoglobulin complex, secretory dimeric IgA immunoglobulin complex, secretory IgA immunoglobulin complex	antigen binding, immunoglobulin receptor binding	antibacterial humoral response, B cell receptor signaling pathway, complement activation, classical pathway, defense response to bacterium, glomerular filtration, immune response, innate immune response, leukocyte migration, phagocytosis, engulfment, phagocytosis, recognition, positive regulation of B cell activation, positive regulation of respiratory burst, receptor-mediated endocytosis, retina…	36.7647	26	36568	5.80713	-0.267647	6.88264e-13
P01861	IGHG4	7.78534	7.49787	7.35948	7.53243	7.95855	8.69471	8.30982	8.15229	8.9318	8.25825	8.5716	7.91598	8.59701	8.61551	8.92109	7.97459	9.09693	9.34953	9.33644	8.50198	Immunoglobulin heavy constant gamma 4	blood microparticle, external side of plasma membrane, extracellular exosome, extracellular region, extracellular space, immunoglobulin complex, circulating	antigen binding, immunoglobulin receptor binding, serine-type endopeptidase activity	B cell receptor signaling pathway, complement activation, complement activation, classical pathway, cytokine-mediated signaling pathway, defense response to bacterium, Fc-gamma receptor signaling pathway involved in phagocytosis, innate immune response, phagocytosis, engulfment, phagocytosis, recognition, positive regulation of B cell activation, regulation of complement activation	44.3425	17	35917.9	7.0376	-0.42263	7.51633e-13
P01008	SERPINC1	8.89554	8.88774	8.71185	7.35008	7.10832	7.35486	7.58219	6.79324	7.61386	7.01329	7.53326	6.06841	7.67166	7.82809	7.52675	6.68945	7.66493	7.74047	7.8428	7.12205	Antithrombin-III	blood microparticle, collagen-containing extracellular matrix, endoplasmic reticulum lumen, extracellular exosome, extracellular region, extracellular space, plasma membrane	heparin binding, identical protein binding, protease binding, serine-type endopeptidase inhibitor activity	acute inflammatory response to antigenic stimulus, blood coagulation, cellular protein metabolic process, lactation, negative regulation of endopeptidase activity, post-translational protein modification, regulation of blood coagulation, intrinsic pathway, response to nutrient	69.181	35	52568.9	6.28564	-0.278233	8.16621e-13
Q96KN2	CNDP1	7.76491	7.68196	7.40944	6.12393	5.60688							4.61411			5.87934		6.02969	6.31312	6.4183		Beta-Ala-His dipeptidase	cytosol, extracellular region	carboxypeptidase activity, dipeptidase activity, metal ion binding, metallopeptidase activity	proteolysis, regulation of cellular protein metabolic process	43.5897	19	56670.1	4.92529	-0.0885602	9.0505e-13
P05106	ITGB3	7.02155	7.19591	6.65487	5.05615	7.69424	8.20967	8.20161	7.18841	8.19439	7.68999	8.22451	6.49506	8.11829	8.2709	8.5505	5.48561	8.27366	7.67288	8.34474	6.616	Integrin beta-3	alphav-beta3 integrin-HMGB1 complex, alphav-beta3 integrin-IGF-1-IGF1R complex, alphav-beta3 integrin-PKCalpha complex, alphav-beta3 integrin-vitronectin complex, cell surface, extracellular exosome, filopodium membrane, focal adhesion, glutamatergic synapse, integral component of plasma membrane, integrin alphav-beta3 complex, integrin complex, lamellipodium membrane, melanosome, microvillus mem…	cell adhesion molecule binding, coreceptor activity, enzyme binding, extracellular matrix binding, fibronectin binding, identical protein binding, integrin binding, platelet-derived growth factor receptor binding, protease binding, protein disulfide isomerase activity, vascular endothelial growth factor receptor 2 binding, virus receptor activity	activation of protein kinase activity, angiogenesis involved in wound healing, apolipoprotein A-I-mediated signaling pathway, apoptotic cell clearance, blood coagulation, cell adhesion, cell adhesion mediated by integrin, cell migration, cell-matrix adhesion, cell-substrate adhesion, extracellular matrix organization, heterotypic cell-cell adhesion, integrin-mediated signaling pathway, leukocyte …	57.868	50	87000.4	4.8501	-0.332487	9.92673e-13
Q02413	DSG1				7.42535		6.80702		6.3643	5.33863		5.63903	6.09993	5.17622	6.95671		6.67147	6.29303	5.36042		6.51718	Desmoglein-1	apical plasma membrane, cornified envelope, cytoplasmic side of plasma membrane, cytosol, desmosome, ficolin-1-rich granule membrane, integral component of membrane, lateral plasma membrane, plasma membrane	calcium ion binding, gamma-catenin binding, toxic substance binding	calcium-dependent cell-cell adhesion via plasma membrane cell adhesion molecules, cell-cell adhesion, cell-cell junction assembly, cornification, homophilic cell adhesion via plasma membrane adhesion molecules, keratinization, maternal process involved in female pregnancy, neutrophil degranulation, protein stabilization, response to progesterone	26.2154	27	113676	4.65869	-0.277312	1.08101e-12
P07357	C8A				5.93707	5.33039	6.56619	6.24954	6.18851	6.59774	5.46951	6.00447	5.69837	6.52379	6.70844	6.54719	6.06195	7.11656	7.28171	7.22053	6.33552	Complement component C8 alpha chain	blood microparticle, extracellular exosome, extracellular region, extracellular space, membrane, membrane attack complex	complement binding, protein-containing complex binding	complement activation, complement activation, alternative pathway, complement activation, classical pathway, cytolysis, immune response, regulation of complement activation	19.5205	9	65121	6.00537	-0.516267	1.18225e-12
P04217	A1BG	8.09218	8.1379	7.87747	7.13109	6.78371	7.23397	7.41962	7.1217	7.54817	6.76136	7.22951	6.73632	7.49586	7.32021	7.58249	7.18268	7.66339	7.84369	7.85639	7.32514	Alpha-1B-glycoprotein	blood microparticle, collagen-containing extracellular matrix, extracellular exosome, extracellular region, extracellular space, ficolin-1-rich granule lumen, platelet alpha granule lumen, secretory granule lumen		neutrophil degranulation, platelet degranulation	41.0101	21	54219.5	5.4585	-0.216566	1.30965e-12
P27824	CANX	6.08381	6.28814	6.07168		5.81394	7.03772	6.99733	6.25715	6.9321	6.53986	7.06075	5.59036	6.91259	6.98834	7.33012	5.65093	7.24453	6.02471	7.27133	5.49273	Calnexin	axon, dendrite cytoplasm, dendritic spine, endoplasmic reticulum, endoplasmic reticulum lumen, endoplasmic reticulum membrane, endoplasmic reticulum quality control compartment, extracellular exosome, glutamatergic synapse, integral component of lumenal side of endoplasmic reticulum membrane, integral component of postsynaptic membrane, integral component of presynaptic active zone membrane, mela…	apolipoprotein binding, calcium ion binding, carbohydrate binding, ionotropic glutamate receptor binding, RNA binding, unfolded protein binding	aging, antigen processing and presentation of exogenous peptide antigen via MHC class II, antigen processing and presentation of peptide antigen via MHC class I, chaperone-mediated protein folding, clathrin-dependent endocytosis, interleukin-27-mediated signaling pathway, interleukin-35-mediated signaling pathway, protein folding, protein folding in endoplasmic reticulum, protein secretion, synap…	31.7568	13	67525.8	4.18018	-0.873986	1.43608e-12
P10646	TFPI									6.32672				6.85965	7.06385	7.07892		7.50924	7.74649	7.52744		Tissue factor pathway inhibitor	anchored component of membrane, caveola, cell surface, endoplasmic reticulum, extracellular region, extracellular space, organelle membrane, plasma membrane	endopeptidase inhibitor activity, serine-type endopeptidase inhibitor activity	blood coagulation, blood coagulation, extrinsic pathway, cellular response to interleukin-1, cellular response to lipopolysaccharide, cellular response to steroid hormone stimulus, negative regulation of blood coagulation, response to estradiol	39.1447	10	34992	8.02881	-0.599342	1.98359e-12
P12814	ACTN1	7.5339	7.5668	7.30515	5.96824	7.29814	7.60453	7.7003	6.76794	7.53775	7.27717	7.81132	6.15205	7.71232	7.80269	7.9841	5.76196	7.74223	7.11714	7.90276	6.21732	Alpha-actinin-1	brush border, cell projection, cell-cell junction, cytoplasm, cytosol, extracellular exosome, extracellular region, extracellular space, fascia adherens, focal adhesion, glutamatergic synapse, intracellular, plasma membrane, platelet alpha granule lumen, pseudopodium, ruffle, stress fiber, Z disc	actin filament binding, calcium ion binding, double-stranded RNA binding, integrin binding, ion channel binding, nuclear receptor transcription coactivator activity, protein homodimerization activity, structural constituent of postsynapse, vinculin binding	actin crosslink formation, actin filament bundle assembly, actin filament network formation, actin filament organization, focal adhesion assembly, negative regulation of cellular component movement, platelet degranulation, platelet formation, platelet morphogenesis, regulation of apoptotic process	47.9821	31	102993	5.05518	-0.598543	2.21413e-12
Q9Y624	F11R					6.49238	6.44577	6.70766	6.15912	7.22894	6.69355	6.85977		7.05195	7.35726	7.36278		7.35885	6.99928	7.23154		Junctional adhesion molecule A	bicellular tight junction, cell junction, cell-cell junction, cytoplasmic vesicle, extracellular exosome, integral component of membrane, plasma membrane, slit diaphragm	cadherin binding, PDZ domain binding, virus receptor activity	actomyosin structure organization, bicellular tight junction assembly, cell adhesion, establishment of endothelial intestinal barrier, extracellular matrix organization, inflammatory response, intestinal absorption, leukocyte migration, negative regulation of GTPase activity, positive regulation of blood pressure, positive regulation of GTPase activity, protein localization to plasma membrane, re…	30.7692	5	32562.5	7.76904	-0.0919732	2.44407e-12
P02747	C1QC	6.52748	6.53468	6.63196	6.86755	7.07814	7.81589	7.51954	7.31087	7.81252	6.76005	7.49122	6.60825	8.63799	8.82652	8.84293	7.11939	9.23558	9.41386	9.32389	7.31178	Complement C1q subcomponent subunit C	blood microparticle, collagen trimer, collagen-containing extracellular matrix, extracellular region, extracellular space	serine-type endopeptidase activity	complement activation, complement activation, classical pathway, immune response, innate immune response, negative regulation of granulocyte differentiation, negative regulation of macrophage differentiation, regulation of complement activation	41.2245	17	25757.1	8.45947	-0.186122	2.68627e-12
P02746	C1QB	7.09243	6.99796	6.70819	6.7076	7.32699	8.06938	7.86914	7.32917	7.88973	7.28926	7.93923	6.7583	8.85068	8.93474	9.0159	7.34511	9.43567	9.53837	9.48261	7.64773	Complement C1q subcomponent subunit B	blood microparticle, collagen trimer, collagen-containing extracellular matrix, complement component C1 complex, extracellular region	protein homodimerization activity, serine-type endopeptidase activity	complement activation, complement activation, classical pathway, innate immune response, inner ear development, regulation of complement activation	50.9881	27	26704.5	8.80811	-0.256917	2.95171e-12
P02647	APOA1	10.7829	10.8562	10.6955	9.49758	9.38414	9.54482	9.41985	8.72768	9.50855	8.93854	9.4336	8.66406	9.26316	9.34448	9.59902	8.63858	9.59674	9.691	9.79233	9.06709	Apolipoprotein A-I	blood microparticle, cell surface, chylomicron, collagen-containing extracellular matrix, cytoplasmic vesicle, cytosol, discoidal high-density lipoprotein particle, early endosome, endocytic vesicle, endocytic vesicle lumen, endoplasmic reticulum lumen, extracellular exosome, extracellular region, extracellular space, extracellular vesicle, high-density lipoprotein particle, intermediate-density …	amyloid-beta binding, apolipoprotein A-I receptor binding, apolipoprotein receptor binding, chemorepellent activity, cholesterol binding, cholesterol transporter activity, enzyme binding, heat shock protein binding, high-density lipoprotein particle binding, high-density lipoprotein particle receptor binding, identical protein binding, lipase inhibitor activity, phosphatidylcholine-sterol O-acylt…	adrenal gland development, animal organ regeneration, blood vessel endothelial cell migration, cellular protein metabolic process, cholesterol biosynthetic process, cholesterol efflux, cholesterol homeostasis, cholesterol import, cholesterol metabolic process, cholesterol transport, chylomicron assembly, chylomicron remodeling, endothelial cell proliferation, G protein-coupled receptor signaling …	91.3858	141	30758.9	5.41064	-0.717228	3.23427e-12
P02748	C9	8.90369	8.90238	8.69535	7.21091	7.23473	7.33788	7.39452	6.23754	7.3677	6.86728	7.38163	6.2465	7.40438	7.5786	7.73753	6.45262	7.99414	8.11989	7.98781	6.76024	Complement component C9	blood microparticle, cytosol, extracellular exosome, extracellular region, extracellular space, integral component of plasma membrane, membrane attack complex, other organism cell membrane, plasma membrane		cell killing, complement activation, alternative pathway, complement activation, classical pathway, hemolysis by symbiont of host erythrocytes, protein homooligomerization, regulation of complement activation	57.0662	47	63132.7	5.23975	-0.450447	3.54947e-12
P07225	PROS1	7.91344	7.69188	7.59638	6.72839	6.67087	7.47792	7.17361	6.8105	7.41196	6.80296	7.26088	6.54756	7.27881	7.32964	7.46872	6.65636	7.76926	7.9869	7.90506	6.93503	Vitamin K-dependent protein S	blood microparticle, endoplasmic reticulum membrane, extracellular exosome, extracellular region, extracellular space, Golgi lumen, Golgi membrane, plasma membrane, platelet alpha granule lumen	calcium ion binding, endopeptidase inhibitor activity	blood coagulation, ER to Golgi vesicle-mediated transport, fibrinolysis, leukocyte migration, platelet degranulation, regulation of complement activation	38.7574	27	75073.9	5.30811	-0.29497	3.88775e-12
P01871	IGHM	8.54757	8.57839	8.30211	7.57486	8.80718	9.25026	9.28461	8.43659	9.36711	8.86962	9.37877	8.28885	9.32121	9.41187	9.63278	8.2704	9.51245	9.58957	9.56009	8.79943	Immunoglobulin heavy constant mu	blood microparticle, cell surface, external side of plasma membrane, extracellular exosome, extracellular space, hexameric IgM immunoglobulin complex, immunoglobulin complex, circulating, integral component of membrane, pentameric IgM immunoglobulin complex, plasma membrane	antigen binding, immunoglobulin receptor binding	adaptive immune response, antibacterial humoral response, B cell receptor signaling pathway, complement activation, classical pathway, defense response to bacterium, defense response to Gram-negative bacterium, innate immune response, leukocyte migration, phagocytosis, engulfment, phagocytosis, recognition, positive regulation of B cell activation	64.9007	53	49408.6	6.31982	-0.318543	4.34329e-12
P05154	SERPINA5				5.64737		6.53003	6.36357	5.77466	6.69738	5.83339	6.2986	4.77148	7.5175	8.21736	7.24657		7.37562	7.56632	7.45219		Plasma serine protease inhibitor	acrosomal membrane, external side of plasma membrane, extracellular exosome, extracellular region, extracellular space, membrane, platelet alpha granule, platelet dense tubular network, protein C inhibitor-coagulation factor V complex, protein C inhibitor-coagulation factor Xa complex, protein C inhibitor-coagulation factor XI complex, protein C inhibitor-KLK3 complex, protein C inhibitor-plasma …	acrosin binding, glycosaminoglycan binding, heparin binding, phosphatidylcholine binding, protease binding, retinoic acid binding, serine-type endopeptidase inhibitor activity	blood coagulation, fusion of sperm to egg plasma membrane involved in single fertilization, lipid transport, negative regulation of endopeptidase activity, negative regulation of hydrolase activity, seminal vesicle development, spermatogenesis	44.5813	19	45645.7	9.64893	-0.115271	4.80163e-12
P10643	C7	7.5396	7.58132	7.36016	6.66682	6.32651	6.99705	6.84238	5.80081	7.08785	6.52251	6.82693	5.49559	7.29503	7.04474	7.40216	5.79599	7.73495	7.78708	7.67782	6.30354	Complement component C7	extracellular exosome, extracellular region, membrane attack complex		cellular sodium ion homeostasis, complement activation, complement activation, alternative pathway, complement activation, classical pathway, cytolysis, regulation of complement activation	51.72	31	93457.3	6.03271	-0.486477	5.28685e-12
P48740	MASP1	7.65205	7.61237	7.30113	6.13986	7.0454	7.65296	7.24719		7.62067	6.94969	7.29264	5.0959	6.93821	6.86587	7.29156	5.84338	7.32694	7.4731	7.46117	5.91754	Mannan-binding lectin serine protease 1	cytosol, extracellular region, extracellular space, nucleoplasm	calcium ion binding, calcium-dependent protein binding, peptidase activity, protein homodimerization activity, serine-type endopeptidase activity	complement activation, complement activation, lectin pathway, negative regulation of complement activation, receptor-mediated endocytosis	40.9156	22	79195.2	5.10986	-0.415308	5.84625e-12
P35579	MYH9	7.79399	7.77548	7.56087	6.69792	8.05617	8.82994	8.68806	8.19279	8.84331	8.32777	8.58721	7.75661	8.48486	8.72396	8.97086	7.51003	9.14449	9.13562	9.17358	8.0009	Myosin-9	actin cytoskeleton, actomyosin, actomyosin contractile ring, brush border, cell leading edge, cell-cell adherens junction, cleavage furrow, cytoplasm, cytosol, extracellular exosome, focal adhesion, immunological synapse, membrane, myosin II complex, myosin II filament, neuromuscular junction, nucleus, plasma membrane, protein-containing complex, ruffle, spindle, stress fiber, uropod	actin binding, actin filament binding, actin-dependent ATPase activity, ADP binding, ATP binding, ATPase activity, cadherin binding, calmodulin binding, integrin binding, microfilament motor activity, motor activity, protein domain specific binding, protein homodimerization activity, protein membrane anchor, RNA binding	actin cytoskeleton reorganization, actin filament-based movement, actomyosin structure organization, angiogenesis, blood vessel endothelial cell migration, cytokinetic process, establishment of meiotic spindle localization, establishment of T cell polarity, in utero embryonic development, integrin-mediated signaling pathway, leukocyte migration, meiotic spindle organization, membrane protein ecto…	65.5612	200	226392	5.31494	-0.85352	7.10564e-12
P17661	DES	6.36575	6.51257	6.57017	6.63555	6.33703	6.18183	6.41828	6.69328	6.24808	6.613	6.24	6.52131	6.45491	6.514	6.63157	6.71064	6.78781	6.75987	6.89746	6.72925	Desmin	cardiac myofibril, cytosol, extracellular exosome, fascia adherens, intercalated disc, intermediate filament, intermediate filament cytoskeleton, neuromuscular junction, nucleus, sarcolemma, Z disc	cytoskeletal protein binding, identical protein binding, structural constituent of cytoskeleton	cytoskeleton organization, intermediate filament organization, muscle contraction, muscle filament sliding, regulation of heart contraction	50.4255	23	53503.1	5.00049	-0.722553	7.82491e-12
P61769	B2M	7.15671	6.97816	6.92513	6.32281	6.52359	7.44167	7.06083	6.64523	7.43405	6.58696	7.04489	5.91888	6.95091	7.23446	7.33836	5.95541	7.32264	7.26566	7.4758	6.4507	Beta-2-microglobulin	cytosol, early endosome lumen, early endosome membrane, endoplasmic reticulum lumen, ER to Golgi transport vesicle membrane, external side of plasma membrane, extracellular exosome, extracellular region, extracellular space, focal adhesion, Golgi apparatus, Golgi membrane, HFE-transferrin receptor complex, membrane, MHC class I protein complex, phagocytic vesicle membrane, plasma membrane, recycl…	identical protein binding	antibacterial humoral response, antigen processing and presentation of endogenous peptide antigen via MHC class I, antigen processing and presentation of exogenous peptide antigen via MHC class I, TAP-dependent, antigen processing and presentation of exogenous peptide antigen via MHC class I, TAP-independent, antigen processing and presentation of exogenous protein antigen via MHC class Ib, TAP-d…	57.1429	6	13705.9	6.06689	-0.376471	8.56363e-12
P23528	CFL1		5.44257	5.60014	5.66573	5.80185	6.69803	6.56897	6.2058	6.90639	6.50375	6.93522	6.16271	6.84206	7.09029	7.12776	5.75368	7.30982	7.30027	7.22703	6.31984	Cofilin-1	cell-cell junction, cortical actin cytoskeleton, cytoplasm, cytosol, extracellular exosome, extracellular space, focal adhesion, lamellipodium, lamellipodium membrane, membrane, nuclear matrix, nucleus, ruffle membrane, vesicle	actin filament binding, signaling receptor binding	actin cytoskeleton organization, actin filament depolymerization, actin filament fragmentation, cytoskeleton organization, establishment of cell polarity, interleukin-12-mediated signaling pathway, mitotic cytokinesis, negative regulation of apoptotic process, neural crest cell migration, neural fold formation, positive regulation by host of viral process, positive regulation of actin filament de…	43.3735	12	18490.7	8.104	-0.359036	9.30507e-12
P08567	PLEK					7.1452	7.40146	7.33639	6.29217	7.37936	6.81154	7.59449	5.21152	7.40185	7.62771	7.87118		7.67381	7.33869	7.75267		Pleckstrin	cytoplasm, cytosol, extracellular region, membrane, plasma membrane, ruffle membrane	DNA-binding transcription factor activity, RNA polymerase II-specific, phosphatidylinositol-3,4-bisphosphate binding, protein homodimerization activity, protein kinase C binding	actin cytoskeleton reorganization, cell projection organization, cortical actin cytoskeleton organization, hematopoietic progenitor cell differentiation, integrin-mediated signaling pathway, negative regulation of calcium-mediated signaling, negative regulation of G protein-coupled receptor signaling pathway, negative regulation of inositol phosphate biosynthetic process, phosphatidylinositol met…	37.4286	9	40099.4	8.22705	-0.552571	1.02001e-11
Q15485	FCN2	7.60085	7.85034	7.44546	5.7938	7.62023	8.30208	7.90922		8.27667	7.55546	7.91133	4.83493	7.35436	7.38371	7.6462	5.38054	7.00303	7.23396	7.58243		Ficolin-2	blood microparticle, collagen trimer, extracellular exosome, extracellular region	antigen binding, calcium-dependent protein binding, mannan binding, metal ion binding, proteoglycan binding, serine-type endopeptidase activity	complement activation, complement activation, lectin pathway, defense response to Gram-negative bacterium, defense response to Gram-positive bacterium, opsonization, recognition of apoptotic cell	38.6581	10	33979.5	6.31299	-0.465815	1.11138e-11
P19652	ORM2	7.74515	7.7787	7.55875	6.75993	7.07906	7.6542	7.72753	6.93678	7.90837	7.4112	7.81938	6.41381	7.79506	7.62308	7.93932	6.94842	8.00416	8.05053	8.10492	7.35124	Alpha-1-acid glycoprotein 2	azurophil granule lumen, blood microparticle, collagen-containing extracellular matrix, extracellular exosome, extracellular region, extracellular space, platelet alpha granule lumen, specific granule lumen		acute-phase response, neutrophil degranulation, platelet degranulation, positive regulation of interleukin-1 beta secretion, positive regulation of interleukin-1 secretion, positive regulation of tumor necrosis factor secretion, regulation of immune system process	35.8209	9	23587.6	4.80908	-0.582587	1.2176e-11
Q9BQE3	TUBA1C	6.66861				6.79136	7.17326	7.26909	5.75746	7.22132	6.88022	7.27381		7.26002	7.08132	7.59357		7.4438	6.42778	7.45478		Tubulin alpha-1C chain	cytoplasm, microtubule, microtubule cytoskeleton, nucleus, vesicle	GTP binding, GTPase activity, structural constituent of cytoskeleton, structural molecule activity	cell division, cytoskeleton-dependent intracellular transport, microtubule cytoskeleton organization, microtubule-based process, mitotic cell cycle	12.2494	4	49863.5	4.73389	-0.23363	1.32361e-11
Q16610	ECM1	7.27244	7.36525	7.03148	6.10468	7.06161	7.44284	7.43551	6.1407	7.09164	6.9479	7.39399	5.71399	7.1089	7.31371	7.58188	6.03196	7.12615	6.71734	7.32691	6.18579	Extracellular matrix protein 1	collagen-containing extracellular matrix, extracellular exosome, extracellular matrix, extracellular region, platelet dense granule lumen	enzyme binding, extracellular matrix structural constituent, interleukin-2 receptor binding, laminin binding, protease binding, protein C-terminus binding	angiogenesis, biomineral tissue development, chondrocyte development, endochondral bone growth, inflammatory response, negative regulation of bone mineralization, negative regulation of cytokine-mediated signaling pathway, negative regulation of peptidase activity, ossification, platelet degranulation, positive regulation of angiogenesis, positive regulation of endothelial cell proliferation, pos…	45.5556	18	60635.3	6.23096	-0.744074	1.42799e-11
P21926	CD9	5.75844	5.82893	5.76583		7.19073	7.42654	7.58428	6.58027	7.3996	6.76907	7.52903	5.30054	7.43992	7.56558	7.7082		7.6326	7.22373	7.70207	5.78906	CD9 antigen	apical plasma membrane, clathrin-coated endocytic vesicle membrane, endocytic vesicle membrane, external side of plasma membrane, extracellular exosome, extracellular space, extracellular vesicle, focal adhesion, integral component of plasma membrane, membrane, plasma membrane, platelet alpha granule membrane	integrin binding	brain development, cell adhesion, cell surface receptor signaling pathway, cellular response to low-density lipoprotein particle stimulus, fusion of sperm to egg plasma membrane involved in single fertilization, negative regulation of cell proliferation, negative regulation of cellular component movement, negative regulation of platelet aggregation, oligodendrocyte development, paranodal junction…	23.2456	6	25399	6.82568	0.487281	1.54072e-11
P03950	ANG			5.85916	6.02872	5.08481	6.63091	5.83892	6.11133	7.51008	6.52095	7.03307	5.90271	8.0009	8.52556	8.37537	6.47622	9.03689	9.10399	9.13546	6.53636	Angiogenin	angiogenin-PRI complex, basement membrane, cytoplasmic vesicle, extracellular region, extracellular space, growth cone, neuronal cell body, nucleolus, nucleus	actin binding, copper ion binding, DNA binding, endonuclease activity, heparin binding, peptide binding, protein homodimerization activity, ribonuclease activity, rRNA binding, signaling receptor binding	actin filament polymerization, activation of phospholipase A2 activity, activation of phospholipase C activity, activation of protein kinase B activity, adherens junction organization, angiogenesis, antibacterial humoral response, antifungal humoral response, antimicrobial humoral immune response mediated by antimicrobial peptide, cell communication, cell migration, defense response to Gram-posit…	80.2721	32	16539.4	9.99072	-0.422449	1.65177e-11
Q15942	ZYX					6.2854	6.98484	6.80301	6.04732	6.93776	6.55227	6.98686		6.88017	7.03574	7.15495		7.20774		7.23286		Zyxin	cell-cell adherens junction, cytosol, focal adhesion, nucleus, phagocytic vesicle, stress fiber	metal ion binding, RNA binding	cell-cell signaling, cell-matrix adhesion, cellular response to interferon-gamma, integrin-mediated signaling pathway, regulation of inflammatory response, stress fiber assembly, transforming growth factor beta receptor signaling pathway, viral process	26.5734	7	61238.2	6.20361	-0.63042	1.7769e-11
P23142	FBLN1	7.40699	7.44535	7.4197	6.24668	6.43482	6.93425	6.60491	6.01695	7.16106	6.31931	6.94904	5.09479	6.70965	6.35357	7.3291	5.35389	7.23374	6.94683	7.57969	5.88107	Fibulin-1	basement membrane, collagen-containing extracellular matrix, elastic fiber, extracellular exosome, extracellular matrix, extracellular region, extracellular space	calcium ion binding, extracellular matrix structural constituent, fibrinogen binding, fibronectin binding, identical protein binding, integrin binding, peptidase activator activity, protein C-terminus binding, protein-containing complex binding	blood coagulation, fibrin clot formation, embryo implantation, extracellular matrix organization, negative regulation of cell adhesion, negative regulation of cell motility, negative regulation of ERK1 and ERK2 cascade, negative regulation of protein phosphorylation, negative regulation of stem cell proliferation, negative regulation of substrate adhesion-dependent cell spreading, negative regula…	33.5704	20	77162.4	4.85693	-0.265718	1.90892e-11
P02749	APOH	7.27449	7.11692	6.94341	7.21144	7.53486	8.04837	7.89031	7.50089	8.23351	7.64584	8.03859	6.83946	7.90654	8.0002	8.25271	7.39251	8.11453	8.45233	8.51175	7.73471	Beta-2-glycoprotein 1	cell surface, chylomicron, collagen-containing extracellular matrix, extracellular exosome, extracellular region, extracellular space, high-density lipoprotein particle, platelet dense granule lumen, very-low-density lipoprotein particle	heparin binding, identical protein binding, lipid binding, lipoprotein lipase activator activity, phospholipid binding	blood coagulation, intrinsic pathway, negative regulation of angiogenesis, negative regulation of blood coagulation, negative regulation of endothelial cell migration, negative regulation of endothelial cell proliferation, negative regulation of fibrinolysis, negative regulation of myeloid cell apoptotic process, negative regulation of smooth muscle cell apoptotic process, plasminogen activation,…	55.942	17	38272.7	7.72803	-0.273623	2.04677e-11
P31025	LCN1				7.33944		6.35573		7.13975	6.76434	5.61096	6.37028	7.19616	5.57136	6.95135	6.73547	7.34067	7.17838	7.23712	7.00576	7.26929	Lipocalin-1	extracellular region, extracellular space	chloride ion binding, cysteine-type endopeptidase inhibitor activity, signaling receptor binding, small molecule binding, zinc ion binding	long-chain fatty acid transport, proteolysis, response to stimulus, retina homeostasis, sensory perception of taste	50.5682	7	19237.8	5.22607	-0.240909	2.19956e-11
Q9NZT1	CALML5				7.32658				6.2117	6.00729		5.24052	5.97416		6.26084		6.45322	6.75735	6.34808		6.32345	Calmodulin-like protein 5	extracellular region, ficolin-1-rich granule lumen, nucleus	calcium ion binding, enzyme regulator activity	calcium-mediated signaling, epidermis development, neutrophil degranulation, signal transduction, spindle pole body organization	47.9452	9	15882.8	4.01611	-0.559589	2.37087e-11
P0C0L4	C4A	7.75149	7.57961	7.57313	6.39346	6.90087	7.12298	7.00879	7.03901	7.53447	6.60998	7.04231	6.71796	7.29894	7.32085	7.42378	6.83707	8.02945	8.17431	7.82208	7.36878	Complement C4-A	axon, blood microparticle, cell junction, dendrite, endoplasmic reticulum lumen, extracellular exosome, extracellular region, extracellular space, neuronal cell body, plasma membrane, synapse	complement component C1q binding, endopeptidase inhibitor activity, serine-type endopeptidase activity	cellular protein metabolic process, complement activation, complement activation, classical pathway, inflammatory response, innate immune response, positive regulation of apoptotic cell clearance, post-translational protein modification, regulation of complement activation	2.98165	3	192664	6.62744	-0.252408	2.56321e-11
P25705	ATP5F1A			5.89792	6.04664	6.69535	7.24009	7.13921	6.43174	6.96108	6.71203	7.18281	6.12862	6.96446	7.29595	7.44577	6.18774	7.23387	6.6671	7.31101	6.24177	ATP synthase subunit alpha, mitochondrial	extracellular exosome, membrane, mitochondrial inner membrane, mitochondrial matrix, mitochondrial proton-transporting ATP synthase complex, mitochondrial proton-transporting ATP synthase complex, catalytic core F(1), mitochondrion, myelin sheath, plasma membrane, proton-transporting ATP synthase complex	ADP binding, angiostatin binding, ATP binding, MHC class I protein binding, proton-transporting ATP synthase activity, rotational mechanism, RNA binding, transmembrane transporter activity	ATP biosynthetic process, ATP metabolic process, ATP synthesis coupled proton transport, cristae formation, electron transport chain, lipid metabolic process, mitochondrial ATP synthesis coupled proton transport, negative regulation of endothelial cell proliferation, positive regulation of blood vessel endothelial cell migration, response to oxidative stress	37.2514	20	59713.6	9.47803	-0.0667269	2.75533e-11
P01009	SERPINA1	9.47442	9.45871	9.17162	8.13963	8.0932	8.51687	8.65773	8.00611	8.85422	8.15604	8.69996	7.87902	8.7485	8.78658	8.77416	8.1097	8.78684	8.92205	8.92256	8.22932	Alpha-1-antitrypsin	collagen-containing extracellular matrix, COPII-coated ER to Golgi transport vesicle, endoplasmic reticulum, endoplasmic reticulum lumen, endoplasmic reticulum-Golgi intermediate compartment membrane, extracellular exosome, extracellular region, extracellular space, ficolin-1-rich granule lumen, Golgi apparatus, Golgi membrane, intracellular membrane-bounded organelle, platelet alpha granule lumen	identical protein binding, protease binding, serine-type endopeptidase inhibitor activity	acute-phase response, blood coagulation, cellular protein metabolic process, COPII vesicle coating, ER to Golgi vesicle-mediated transport, negative regulation of endopeptidase activity, neutrophil degranulation, platelet degranulation, post-translational protein modification	70.5742	60	46707	5.2124	-0.183254	2.94872e-11
P07358	C8B	8.14009	8.21657	7.95503	6.7746	6.90412	7.04361	6.97487	6.14776	7.08579	6.50897	6.89455	5.71832	7.01506	7.18901	7.24351	6.12466	7.62148	7.68577	7.70298	6.44816	Complement component C8 beta chain	extracellular exosome, extracellular region, extracellular vesicle, membrane, membrane attack complex	protein-containing complex binding	complement activation, complement activation, alternative pathway, complement activation, classical pathway, cytolysis, immune response, regulation of complement activation	55.4992	45	67003.5	7.87158	-0.552623	3.18525e-11
O14950	MYL12B	6.60833	6.37804	6.41578	5.65568	7.19793	7.49391	7.55864	6.77443	7.38717	7.16043	7.61392	5.89454	7.6019	7.81776	8.00212	5.42774	7.71233	6.90974	7.84591	6.17612	Myosin regulatory light chain 12B	apical part of cell, brush border, cell cortex region, cytosol, extracellular exosome, myosin II complex, stress fiber, Z disc	calcium ion binding, myosin heavy chain binding	muscle contraction, regulation of cell shape	54.6512	8	19766.5	4.40576	-0.777907	3.65933e-11
P61626	LYZ		5.44873	4.60479	7.36397	6.06059	5.97751	5.37994	6.83725	6.35977	4.46749	7.00417	6.8082	6.84942	7.60042	6.31642	7.21116	6.94789	6.82802	6.74077	7.07277	Lysozyme C	azurophil granule lumen, extracellular exosome, extracellular region, extracellular space, specific granule lumen, tertiary granule lumen	identical protein binding, lysozyme activity	antimicrobial humoral response, cellular protein metabolic process, cytolysis, defense response to bacterium, defense response to Gram-negative bacterium, defense response to Gram-positive bacterium, inflammatory response, killing of cells of other organism, neutrophil degranulation, retina homeostasis	73.6486	12	16526.3	9.31396	-0.194595	3.89725e-11
P02760	AMBP	8.15367	8.02803	7.89009	6.87302	6.97051	7.24087	6.97541	6.85405	7.31273	6.76124	7.31667	6.46412	7.11234	7.35614	7.29467	6.83507	7.32119	7.5947	7.56961	7.05461	Protein AMBP	blood microparticle, cell surface, collagen-containing extracellular matrix, extracellular exosome, extracellular region, extracellular space, intracellular membrane-bounded organelle, plasma membrane	calcium channel inhibitor activity, calcium oxalate binding, heme binding, IgA binding, protein homodimerization activity, serine-type endopeptidase inhibitor activity	cell adhesion, female pregnancy, heme catabolic process, negative regulation of immune response, negative regulation of JNK cascade, protein catabolic process, protein-chromophore linkage, receptor-mediated endocytosis, viral process	38.3523	15	38974	5.85498	-0.298864	4.15585e-11
P00748	F12	7.69914	7.68187	7.44062	6.17946	7.53244	8.05986	7.66593	6.28374	7.89864	7.24442	7.70694	6.11432	7.58498	7.70851	7.77136	6.49131	7.91979	8.03745	7.9572	6.49218	Coagulation factor XII	extracellular exosome, extracellular region, extracellular space, plasma membrane, rough endoplasmic reticulum	calcium ion binding, misfolded protein binding, serine-type endopeptidase activity	blood coagulation, intrinsic pathway, Factor XII activation, fibrinolysis, innate immune response, plasma kallikrein-kinin cascade, positive regulation of blood coagulation, positive regulation of fibrinolysis, positive regulation of plasminogen activation, protein autoprocessing, protein processing, proteolysis, response to misfolded protein, zymogen activation	32.8455	23	67747.9	7.42041	-0.411057	4.9448e-11
P22352	GPX3	8.21766	8.28577	8.08109	6.3126	6.75613	7.14704	7.21479	5.93423	6.99283	6.57312	7.05877	5.62973	6.98341	7.14086	7.34902	6.00908	7.13375	7.19176	7.3697	6.53515	Glutathione peroxidase 3	extracellular exosome, extracellular region, extracellular space	glutathione peroxidase activity, selenium binding, transcription factor binding	cellular response to oxidative stress, hydrogen peroxide catabolic process, protein homotetramerization, response to lipid hydroperoxide	39.823	7	25536.9	8.11084	-0.221778	5.21022e-11
P11277	SPTB	6.30383		5.4542	5.60495	6.29202	6.90442	6.87094	6.6327	7.31884	6.67974	7.10075	6.28121	6.87625	6.9607	7.22799	6.18747	7.37306	7.44714	7.29859	7.01746	Spectrin beta chain, erythrocytic	actin cytoskeleton, cell surface, cytosol, Golgi apparatus, intrinsic component of the cytoplasmic side of the plasma membrane, protein-containing complex, spectrin, spectrin-associated cytoskeleton	actin binding, actin filament binding, ankyrin binding, Ras guanyl-nucleotide exchange factor activity, structural constituent of cytoskeleton	actin filament capping, axon guidance, ER to Golgi vesicle-mediated transport, MAPK cascade	45.2971	79	246316	4.93896	-0.670332	5.47506e-11
O43866	CD5L	7.41421	7.20085	7.03814	6.32806	7.35587	7.88137	7.74429	7.17345	8.14067	7.47468	7.91879	7.06387	7.91715	7.86811	8.23918	6.96874	8.16267	8.31114	8.25254	7.55606	CD5 antigen-like	blood microparticle, cytoplasm, extracellular region, extracellular space, membrane	scavenger receptor activity	apoptotic process, cellular defense response, immune system process, inflammatory response	56.7723	23	38062.9	5.09619	-0.442651	5.7787e-11
P27918	CFP	7.6317	7.30506	7.34964	5.60502	6.34569	6.24249	6.22971	5.93329	6.63919	5.82466	6.27515	5.36296	7.03058	7.26988	7.49668	6.10195	7.79101	7.89947	7.93695	7.12484	Properdin	endoplasmic reticulum lumen, extracellular region, extracellular space, specific granule lumen, tertiary granule lumen	serine-type endopeptidase activity	complement activation, complement activation, alternative pathway, defense response to bacterium, immune response, neutrophil degranulation, regulation of complement activation	31.7697	18	51242	7.60498	-0.614286	6.49315e-11
P69905	HBA1	7.3987	5.98651	7.1772	5.98329	7.07272	7.2633	7.35722	6.26048	7.69779	7.09591	7.70526	5.87288	7.42201	7.39188	7.72811	6.13472	7.68141	7.70674	7.83897	6.70097	Hemoglobin subunit alpha	blood microparticle, cytosol, cytosolic small ribosomal subunit, endocytic vesicle lumen, extracellular exosome, extracellular region, extracellular space, haptoglobin-hemoglobin complex, hemoglobin complex, membrane	heme binding, iron ion binding, organic acid binding, oxygen binding, oxygen carrier activity	bicarbonate transport, cellular oxidant detoxification, hydrogen peroxide catabolic process, oxygen transport, positive regulation of cell death, protein heterooligomerization, receptor-mediated endocytosis, response to hydrogen peroxide	71.1268	7	15247.9	9.19775	0.0478873	6.90115e-11
P02649	APOE	9.04656	9.04201	8.83977	7.8959	7.96678	8.30722	8.18622	7.38109	8.41761	7.86776	8.42275	7.0183	8.2501	8.52859	8.56962	7.04797	9.16047	9.21193	9.19056	7.60475	Apolipoprotein E	blood microparticle, chylomicron, clathrin-coated endocytic vesicle membrane, collagen-containing extracellular matrix, cytoplasm, dendrite, discoidal high-density lipoprotein particle, early endosome, endocytic vesicle lumen, endoplasmic reticulum, endoplasmic reticulum lumen, extracellular exosome, extracellular region, extracellular space, extracellular vesicle, glutamatergic synapse, Golgi ap…	amyloid-beta binding, antioxidant activity, cholesterol binding, cholesterol transporter activity, heparin binding, identical protein binding, lipid binding, lipid transporter activity, lipoprotein particle binding, low-density lipoprotein particle receptor binding, metal chelating activity, phosphatidylcholine-sterol O-acyltransferase activator activity, phospholipid binding, protein dimerizatio…	AMPA glutamate receptor clustering, amyloid precursor protein metabolic process, artery morphogenesis, cellular calcium ion homeostasis, cellular protein metabolic process, cGMP-mediated signaling, cholesterol biosynthetic process, cholesterol catabolic process, cholesterol efflux, cholesterol homeostasis, cholesterol metabolic process, chylomicron assembly, chylomicron remnant clearance, chylomi…	86.7508	100	36131.8	5.46533	-0.595899	7.32021e-11
P02549	SPTA1	6.72087	6.89577	6.86326	5.62387	6.41255	7.079	7.05261	6.60539	7.39747	6.74263	7.24062	6.28915	7.02055	7.0772	7.31713	6.23116	7.61023	7.68832	7.57634	6.9581	Spectrin alpha chain, erythrocytic 1	actin cytoskeleton, axon, cuticular plate, cytosol, intrinsic component of the cytoplasmic side of the plasma membrane, spectrin, spectrin-associated cytoskeleton	actin filament binding, calcium ion binding, protein heterodimerization activity, Ras guanyl-nucleotide exchange factor activity, structural constituent of cytoskeleton	actin filament capping, actin filament organization, axon guidance, ER to Golgi vesicle-mediated transport, hemopoiesis, lymphocyte homeostasis, MAPK cascade, plasma membrane organization, porphyrin-containing compound biosynthetic process, positive regulation of protein binding, positive regulation of T cell proliferation, regulation of cell shape	52.6251	115	279842	4.72705	-0.761678	7.73394e-11
P30101	PDIA3	5.99753	5.92885	6.00456	5.68004	6.53111	6.94291	6.93603	6.36765	6.9353	6.58686	6.93137	5.70069	6.91777	7.1089	7.28986	5.79628	7.04652	6.24468	7.20028	5.87108	Protein disulfide-isomerase A3	cell surface, endoplasmic reticulum, endoplasmic reticulum lumen, extracellular exosome, extracellular space, focal adhesion, melanosome, MHC class I peptide loading complex, myelin sheath, nucleus, phagocytic vesicle, recycling endosome membrane	cysteine-type endopeptidase activity, disulfide oxidoreductase activity, identical protein binding, peptide disulfide oxidoreductase activity, phospholipase C activity, protein disulfide isomerase activity, RNA binding	antigen processing and presentation of exogenous peptide antigen via MHC class I, TAP-dependent, antigen processing and presentation of peptide antigen via MHC class I, cell redox homeostasis, positive regulation of extrinsic apoptotic signaling pathway, protein folding, protein folding in endoplasmic reticulum, response to endoplasmic reticulum stress	42.9703	22	56746.7	5.9165	-0.506337	8.36748e-11
O00187	MASP2	8.01919	8.02863	7.70329	6.41204	6.88664	7.34604	6.76021	5.67885	7.39599	6.78526	6.67558		6.095	6.62808	6.6699		6.73608	7.08052	6.89057		Mannan-binding lectin serine protease 2	extracellular exosome, extracellular region, extracellular space	calcium ion binding, calcium-dependent protein binding, complement component C4b binding, peptidase activity, serine-type endopeptidase activity	complement activation, complement activation, classical pathway, complement activation, lectin pathway	34.5481	19	75653.6	5.23291	-0.282945	9.013e-11
O75083	WDR1	5.46863	5.16006			5.53806	6.34818	6.05456	5.90855	6.4824	6.02277	6.77132	5.17717	6.65809	6.74132	7.07552	5.18927	6.72707	5.76675	6.94704	5.38451	WD repeat-containing protein 1	actomyosin, actin portion, cell junction, cell projection, cell-cell junction, cortical actin cytoskeleton, cytosol, extracellular exosome, extracellular region, myelin sheath, plasma membrane, podosome	actin filament binding	actin filament depolymerization, actin filament fragmentation, apical junction assembly, cortical cytoskeleton organization, establishment of planar polarity of follicular epithelium, locomotion, maintenance of epithelial cell apical/basal polarity, neutrophil mediated immunity, neutrophil migration, platelet degranulation, platelet formation, positive regulation of actin filament depolymerizatio…	32.6733	12	66151.9	6.16943	-0.238119	9.68992e-11
P04075	ALDOA	7.30459	7.41615	7.22606	6.49396	6.67345	7.10938	6.92393	6.54486	7.10001	6.70703	7.4274	6.12031	7.18693	7.29206	7.50551	6.39773	7.59057	7.47171	7.56378	6.47513	Fructose-bisphosphate aldolase A	actin cytoskeleton, cytosol, extracellular exosome, extracellular region, extracellular space, ficolin-1-rich granule lumen, I band, M band, membrane, nucleus, platelet alpha granule lumen, secretory granule lumen, sperm head, tertiary granule lumen	actin binding, cadherin binding, cytoskeletal protein binding, fructose binding, fructose-bisphosphate aldolase activity, identical protein binding, RNA binding, tubulin binding	actin filament organization, ATP biosynthetic process, binding of sperm to zona pellucida, canonical glycolysis, fructose 1,6-bisphosphate metabolic process, fructose metabolic process, gluconeogenesis, glycolytic process, muscle cell cellular homeostasis, neutrophil degranulation, platelet degranulation, protein homotetramerization, regulation of cell shape, striated muscle contraction	69.2308	23	39395.3	7.93994	-0.262088	1.03697e-10
Q14766	LTBP1	6.25572	6.0537			6.50515	7.1418	6.88825	6.30574	6.94037	6.57888	6.91488	5.22617	6.91567	7.07295	7.31241		7.34225	6.98491	7.47434		Latent-transforming growth factor beta-binding protein 1	collagen-containing extracellular matrix, endoplasmic reticulum lumen, extracellular matrix, extracellular region, microfibril, protein-containing complex	calcium ion binding, extracellular matrix structural constituent, microfibril binding, transforming growth factor beta binding, transforming growth factor beta-activated receptor activity	aorta development, cellular protein metabolic process, coronary vasculature development, post-translational protein modification, regulation of transforming growth factor beta activation, sequestering of TGFbeta in extracellular matrix, ventricular septum development	21.9059	26	186673	5.53369	-0.493202	1.11023e-10
P02652	APOA2	9.36373	9.43516	9.24159	8.57741	8.20191	8.48228	8.25264	8.09818	8.62073	7.76055	8.1962	7.78444	8.37595	8.35667	8.45212	8.12624	8.6256	8.96542	9.02867	8.28569	Apolipoprotein A-II	blood microparticle, chylomicron, cytosol, early endosome, endoplasmic reticulum lumen, extracellular exosome, extracellular region, high-density lipoprotein particle, spherical high-density lipoprotein particle, very-low-density lipoprotein particle	apolipoprotein receptor binding, cholesterol binding, cholesterol transporter activity, heat shock protein binding, high-density lipoprotein particle binding, high-density lipoprotein particle receptor binding, lipase inhibitor activity, lipid binding, lipid transporter activity, phosphatidylcholine binding, phosphatidylcholine-sterol O-acyltransferase activator activity, phospholipid binding, pr…	acute inflammatory response, animal organ regeneration, cellular protein metabolic process, cholesterol efflux, cholesterol homeostasis, cholesterol metabolic process, cholesterol transport, chylomicron assembly, chylomicron remodeling, diacylglycerol catabolic process, high-density lipoprotein particle assembly, high-density lipoprotein particle clearance, high-density lipoprotein particle remod…	64	20	11167.9	6.56592	-0.084	1.191e-10
Q96IY4	CPB2	7.26792	6.8318	6.49539		5.86021	6.7307	6.20857	5.00118	6.42062	5.76694	6.03793		6.21257	6.22257	6.32111		6.5761	6.79014	6.72568		Carboxypeptidase B2	cell, extracellular exosome, extracellular region, extracellular space	metallocarboxypeptidase activity, zinc ion binding	blood coagulation, cellular response to glucose stimulus, fibrinolysis, liver regeneration, negative regulation of fibrinolysis, negative regulation of hepatocyte proliferation, negative regulation of plasminogen activation, positive regulation of extracellular matrix constituent secretion, proteolysis, regulation of complement activation, response to drug, response to heat	25.7683	10	48393.4	7.42725	-0.162411	1.2804e-10
Q8NBP7	PCSK9	7.43198	7.33411	7.17415		5.22989																Proprotein convertase subtilisin/kexin type 9	cell surface, COPII-coated ER to Golgi transport vesicle, cytoplasm, early endosome, endolysosome membrane, endoplasmic reticulum, endoplasmic reticulum lumen, extracellular region, extracellular space, extrinsic component of external side of plasma membrane, Golgi apparatus, late endosome, lysosomal membrane, lysosome, PCSK9-AnxA2 complex, PCSK9-LDLR complex, perinuclear region of cytoplasm, pla…	apolipoprotein binding, apolipoprotein receptor binding, low-density lipoprotein particle binding, low-density lipoprotein particle receptor binding, protein self-association, receptor inhibitor activity, RNA binding, serine-type endopeptidase activity, sodium channel inhibitor activity, very-low-density lipoprotein particle binding, very-low-density lipoprotein particle receptor binding	apoptotic process, cellular protein metabolic process, cellular response to insulin stimulus, cellular response to starvation, cholesterol homeostasis, cholesterol metabolic process, kidney development, lipoprotein metabolic process, liver development, low-density lipoprotein particle clearance, low-density lipoprotein particle receptor catabolic process, lysosomal transport, negative regulation …	31.0694	13	74239.1	6.12842	-0.140173	1.37271e-10
P15692	VEGFA				6.92766				6.66905				6.42744				6.88017	6.2437	6.54249		7.09452	Vascular endothelial growth factor A	cell surface, cytoplasm, extracellular matrix, extracellular region, extracellular space, membrane, platelet alpha granule lumen, secretory granule	chemoattractant activity, cytokine activity, extracellular matrix binding, fibronectin binding, growth factor activity, heparin binding, identical protein binding, neuropilin binding, platelet-derived growth factor receptor binding, protein heterodimerization activity, protein homodimerization activity, receptor ligand activity, vascular endothelial growth factor receptor 1 binding, vascular endo…	activation of protein kinase activity, angiogenesis, artery morphogenesis, basophil chemotaxis, branching involved in blood vessel morphogenesis, branching morphogenesis of an epithelial tube, camera-type eye morphogenesis, cardiac muscle fiber development, cardiac vascular smooth muscle cell development, cell maturation, cell migration involved in sprouting angiogenesis, cellular response to hyp…	31.0345	7	27024.2	8.87646	-0.782759	1.46618e-10
P68871	HBB	7.44026	7.39013	7.07021	6.8764	6.95824	7.54196	7.46957	7.16388	7.83884	7.21346	7.64291	7.05941	7.49955	7.67798	7.81897	7.147	7.94465	8.15857	8.02508	7.57294	Hemoglobin subunit beta	blood microparticle, cytosol, endocytic vesicle lumen, extracellular exosome, extracellular region, extracellular space, ficolin-1-rich granule lumen, haptoglobin-hemoglobin complex, hemoglobin complex, tertiary granule lumen	heme binding, hemoglobin alpha binding, hemoglobin binding, metal ion binding, organic acid binding, oxygen binding, oxygen carrier activity	bicarbonate transport, blood coagulation, cellular oxidant detoxification, hydrogen peroxide catabolic process, neutrophil degranulation, nitric oxide transport, oxygen transport, platelet aggregation, positive regulation of cell death, positive regulation of nitric oxide biosynthetic process, protein heterooligomerization, receptor-mediated endocytosis, regulation of blood pressure, regulation o…	55.7823	7	15988.3	6.8667	0.0136054	1.57293e-10
Q9H4G4	GLIPR2	7.02348	6.63675	6.57474																		Golgi-associated plant pathogenesis-related protein 1	extracellular exosome, extracellular space, Golgi membrane	protein homodimerization activity	positive regulation of epithelial cell migration, positive regulation of epithelial to mesenchymal transition, positive regulation of ERK1 and ERK2 cascade	38.3117	4	17207.5	9.79932	-0.788312	1.68932e-10
P43304	GPD2						6.4876			6.11319	5.93704	6.27456		5.86372	6.09911	6.40018		6.13562		6.26722		Glycerol-3-phosphate dehydrogenase, mitochondrial	glycerol-3-phosphate dehydrogenase complex, mitochondrial inner membrane, mitochondrion	calcium ion binding, glycerol-3-phosphate dehydrogenase (quinone) activity, glycerol-3-phosphate dehydrogenase [NAD+] activity, sn-glycerol-3-phosphate:ubiquinone-8 oxidoreductase activity	camera-type eye development, gluconeogenesis, glycerol catabolic process, glycerol-3-phosphate catabolic process, glycerophosphate shuttle, multicellular organism growth	9.90371	4	80801.6	7.44775	-0.214993	1.80909e-10
P68366	TUBA4A	7.07683	6.88823	6.41865	5.35847	7.20693	7.83532	7.66588	6.78865	7.63708	7.42143	7.83829	6.0021	7.68656	7.8901	8.06727	5.51146	7.96345	6.85308	8.06655	5.865	Tubulin alpha-4A chain	cytoplasm, cytoskeleton, cytosol, extracellular exosome, extracellular region, microtubule, microtubule cytoskeleton	GTP binding, GTPase activity, protein kinase binding, structural constituent of cytoskeleton	ciliary basal body-plasma membrane docking, G2/M transition of mitotic cell cycle, microtubule cytoskeleton organization, microtubule-based process, mitotic cell cycle, platelet degranulation, regulation of G2/M transition of mitotic cell cycle	18.5268	8	49892.4	4.69971	-0.251563	1.928e-10
Q03591	CFHR1	6.19889		6.2595		6.29433			5.33324	6.30609				6.85575	6.8716	7.07251		7.76328	7.94936	7.84439	5.68797	Complement factor H-related protein 1	blood microparticle, extracellular region, extracellular space, protein-containing complex	protein heterodimerization activity, protein homodimerization activity	complement activation, negative regulation of protein binding, positive regulation of cytolysis, regulation of complement activation	10.9091	4	37626	7.07861	-0.576667	2.05877e-10
Q04756	HGFAC													6.45434	6.56844	6.60981		6.9512	7.33247	7.0393		Hepatocyte growth factor activator	cytosol, extracellular region, extracellular space, rough endoplasmic reticulum	serine-type endopeptidase activity, serine-type peptidase activity	proteolysis	7.48092	3	70636.1	6.82568	-0.298321	2.19274e-10
P15924	DSP				7.6074		6.71755	6.03871	6.17972	6.44527	5.56281	6.27823	6.32383	5.99363	6.71971	6.74852	6.81743	6.649	6.54643	6.72228	6.43092	Desmoplakin	basolateral plasma membrane, cornified envelope, cytoplasm, desmosome, extracellular exosome, fascia adherens, ficolin-1-rich granule membrane, intercalated disc, intermediate filament, membrane, nucleus, plasma membrane	cell adhesion molecule binding, cell adhesive protein binding involved in bundle of His cell-Purkinje myocyte communication, protein binding, bridging, protein kinase C binding, RNA binding, scaffold protein binding, structural constituent of cytoskeleton, structural molecule activity	adherens junction organization, bundle of His cell-Purkinje myocyte adhesion involved in cell communication, cell-cell adhesion, cornification, desmosome organization, epidermis development, intermediate filament cytoskeleton organization, intermediate filament organization, keratinization, keratinocyte differentiation, neutrophil degranulation, peptide cross-linking, protein localization to adhe…	33.6468	105	331569	6.37451	-0.823372	2.32925e-10
P16284	PECAM1					6.42459	7.01379	7.12359	6.23876	6.72984	6.5041	6.87682	5.5943	6.8979	7.25404	7.21175		7.21607	6.3495	6.9842	5.41237	Platelet endothelial cell adhesion molecule	cell-cell contact zone, external side of plasma membrane, extracellular exosome, extracellular space, integral component of membrane, membrane raft, plasma membrane, platelet alpha granule membrane, secretory granule membrane, smooth muscle contractile fiber	protein homodimerization activity	angiogenesis, cell recognition, cell-cell adhesion via plasma-membrane adhesion molecules, diapedesis, endothelial cell migration, endothelial cell morphogenesis, endothelial cell-matrix adhesion, extracellular matrix organization, glomerular endothelium development, homophilic cell adhesion via plasma membrane adhesion molecules, leukocyte cell-cell adhesion, leukocyte migration, neutrophil degr…	30.3523	17	82469.8	6.53857	-0.3271	2.46879e-10
P06681	C2	7.68986	7.66131	7.40128	6.22813	4.62313			5.4984	5.92757				6.07018	6.48806				6.48123	6.39821	5.65703	Complement C2	extracellular exosome, extracellular region, extracellular space	metal ion binding, serine-type endopeptidase activity	complement activation, complement activation, classical pathway, innate immune response, positive regulation of apoptotic cell clearance, regulation of complement activation, response to nutrient	36.7021	26	83214.3	7.04443	-0.298271	2.90004e-10
P26038	MSN			5.5673			6.19489		5.83745	6.92359	6.39329	6.76086	5.56347	6.64579	6.94702	6.95424	5.61645	7.49711	7.69189	7.53111	6.08527	Moesin	apical part of cell, apical plasma membrane, basolateral plasma membrane, blood microparticle, cell periphery, cell surface, cytoplasm, cytoskeleton, cytosol, extracellular exosome, extracellular space, filopodium, focal adhesion, invadopodium, microvillus, microvillus membrane, myelin sheath, nucleus, perinuclear region of cytoplasm, plasma membrane, pseudopodium, uropod, vesicle	actin binding, cell adhesion molecule binding, double-stranded RNA binding, enzyme binding, protein kinase binding, signaling receptor binding, structural constituent of cytoskeleton	cellular response to testosterone stimulus, establishment of endothelial barrier, establishment of epithelial cell apical/basal polarity, gland morphogenesis, immunological synapse formation, interleukin-12-mediated signaling pathway, leukocyte cell-cell adhesion, leukocyte migration, membrane to membrane docking, positive regulation of cellular protein catabolic process, positive regulation of e…	34.3154	24	67777.8	5.99854	-0.975043	3.14459e-10
P10809	HSPD1				5.76986	6.50312	6.89479	6.7554	6.24665	6.76962	6.41583	6.80637	5.82163	6.61554	6.75454	7.07648	5.86602	6.9244	6.39319	6.98902	6.07618	60 kDa heat shock protein, mitochondrial	cell surface, clathrin-coated pit, coated vesicle, cytoplasm, cytosol, early endosome, extracellular exosome, extracellular space, Golgi apparatus, lipopolysaccharide receptor complex, membrane, membrane raft, mitochondrial crista, mitochondrial inner membrane, mitochondrial matrix, mitochondrion, myelin sheath, peroxisomal matrix, plasma membrane, protein-containing complex, rough endoplasmic re…	apolipoprotein A-I binding, apolipoprotein binding, ATP binding, ATPase activity, chaperone binding, DNA replication origin binding, double-stranded RNA binding, enzyme binding, high-density lipoprotein particle binding, insulin binding, lipopolysaccharide binding, modification-dependent protein binding, p53 binding, protease binding, protein heterodimerization activity, RNA binding, single-stran…	'de novo' protein folding, activation of cysteine-type endopeptidase activity involved in apoptotic process, apoptotic mitochondrial changes, B cell activation, B cell cytokine production, B cell proliferation, cellular response to heat, chaperone-mediated protein complex assembly, interaction with symbiont, isotype switching to IgG isotypes, mitochondrion organization, MyD88-dependent toll-like …	25.3054	10	61016.4	5.51318	-0.0764398	3.63435e-10
P21291	CSRP1					6.41799	7.00197	6.87011		7.19991	6.52986	6.97937		7.04554	7.33959	7.37601		7.36955	7.48123	7.46083		Cysteine and glycine-rich protein 1	extracellular exosome, focal adhesion, nucleus	RNA binding, zinc ion binding	platelet aggregation	64.2487	10	20553.8	8.42529	-0.526425	4.23164e-10
P02655	APOC2	9.12359	8.97593	8.86276	8.12825	8.12961	8.1433	8.33168	7.83139	8.82613	8.01518	8.3677	7.62932	8.30701	8.41493	8.66954	7.77902	8.89206	8.83663	9.08364	8.08631	Apolipoprotein C-II	chylomicron, early endosome, extracellular region, extracellular space, intermediate-density lipoprotein particle, low-density lipoprotein particle, spherical high-density lipoprotein particle, very-low-density lipoprotein particle	lipase inhibitor activity, lipid binding, lipoprotein lipase activator activity, phospholipase activator activity, phospholipase binding, protein homodimerization activity	cholesterol efflux, cholesterol homeostasis, chylomicron assembly, chylomicron remnant clearance, chylomicron remodeling, high-density lipoprotein particle clearance, high-density lipoprotein particle remodeling, lipid catabolic process, lipoprotein transport, negative regulation of cholesterol transport, negative regulation of lipid metabolic process, negative regulation of receptor-mediated end…	59.4059	11	11276.8	4.38525	-0.169307	4.65488e-10
P06727	APOA4	10.0019	9.99981	9.71918	8.40935	8.28478	8.21231	8.03158	7.17004	8.00891	7.55519	7.97214	6.97924	7.89222	7.93192	8.18273	7.16061	8.33149	8.34951	8.52429	7.52684	Apolipoprotein A-IV	blood microparticle, chylomicron, collagen-containing extracellular matrix, cytosol, early endosome, endoplasmic reticulum lumen, extracellular exosome, extracellular region, extracellular space, high-density lipoprotein particle, very-low-density lipoprotein particle	antioxidant activity, cholesterol binding, cholesterol transporter activity, copper ion binding, identical protein binding, lipid binding, lipid transporter activity, phosphatidylcholine binding, phosphatidylcholine-sterol O-acyltransferase activator activity, phospholipid binding, protein homodimerization activity	cellular protein metabolic process, cholesterol biosynthetic process, cholesterol efflux, cholesterol homeostasis, cholesterol metabolic process, chylomicron assembly, chylomicron remodeling, high-density lipoprotein particle assembly, high-density lipoprotein particle remodeling, hydrogen peroxide catabolic process, innate immune response in mucosa, leukocyte cell-cell adhesion, lipid catabolic …	83.5859	96	45371.5	5.08936	-0.795707	5.10607e-10
P55056	APOC4	8.37928	8.22824	7.90785	6.70524	6.89192	7.54108	7.46425	6.31297	7.9163	7.32959	7.74777	5.90822	7.52649	7.70284	8.07353	5.77006	8.20718	8.04901	8.3028	6.43621	Apolipoprotein C-IV	extracellular region, high-density lipoprotein particle, very-low-density lipoprotein particle	lipid transporter activity	lipid metabolic process, positive regulation of sequestering of triglyceride, triglyceride homeostasis, very-low-density lipoprotein particle assembly, very-low-density lipoprotein particle clearance	51.9685	11	14543.5	9.08154	-0.265354	5.56122e-10
P07203	GPX1			6.14883		6.68109	7.09164	7.22051			6.59899	7.21249		7.1005	6.95106	7.25022		7.41578		7.03759		Glutathione peroxidase 1	cytoplasm, cytosol, mitochondrial matrix, mitochondrion	glutathione peroxidase activity, SH3 domain binding	angiogenesis involved in wound healing, blood vessel endothelial cell migration, cell redox homeostasis, cellular response to oxidative stress, endothelial cell development, fat cell differentiation, glutathione metabolic process, heart contraction, hydrogen peroxide catabolic process, interaction with symbiont, intrinsic apoptotic signaling pathway in response to oxidative stress, lipoxygenase p…	36.9458	5	22075.1	6.12842	-0.070297	6.04177e-10
Q08188	TGM3				7.34765		6.527		6.15388		5.68826		5.99165		6.96719		6.38373		6.73473	7.10699	6.02892	Protein-glutamine gamma-glutamyltransferase E	cytoplasm, extracellular exosome, extrinsic component of cytoplasmic side of plasma membrane	calcium ion binding, catalytic activity, protein-glutamine gamma-glutamyltransferase activity, transferase activity, transferring acyl groups	cell envelope organization, cellular protein modification process, hair follicle morphogenesis, keratinization, keratinocyte differentiation, peptide cross-linking, protein tetramerization	41.5584	25	76583.6	5.45166	-0.234921	6.51961e-10
P27105	STOM	6.65624	6.59691	6.30257	4.58453	6.85305	7.58596	7.4496	7.02023	7.60105	7.12596	7.62721	6.50001	7.52702	7.73625	7.81135	6.21546	7.73389	7.60537	7.97327	6.97377	Erythrocyte band 7 integral membrane protein	azurophil granule membrane, blood microparticle, cytoskeleton, endoplasmic reticulum, extracellular exosome, extracellular space, integral component of plasma membrane, melanosome, membrane, membrane raft, mitochondrion, perinuclear region of cytoplasm, plasma membrane, specific granule membrane, tertiary granule membrane, vesicle	protein homodimerization activity, RNA polymerase binding	neutrophil degranulation, positive regulation by host of viral genome replication, positive regulation of protein targeting to membrane, protein homooligomerization, regulation of acid-sensing ion channel activity	69.7917	19	31710.7	7.86475	0.0434028	7.03626e-10
P12955	PEPD	7.26603	7.23818	7.05401	5.84792	5.88376			5.46743				5.19082				5.23763					Xaa-Pro dipeptidase	extracellular exosome, nucleoplasm, nucleus	aminopeptidase activity, manganese ion binding, metallocarboxypeptidase activity, proline dipeptidase activity	cellular amino acid metabolic process, collagen catabolic process, proteolysis	28.3976	12	54512.9	5.56104	-0.129615	7.55015e-10
P29622	SERPINA4	8.19504	8.25362	8.0228	6.44019	6.26535	6.39567	6.1575	5.79438	6.03141	5.16768	5.89578	5.22857	6.12393	6.53244	6.00149	6.2399	6.77145	7.10207	7.04162	6.76972	Kallistatin	extracellular exosome, extracellular region, extracellular space, platelet dense granule lumen	serine-type endopeptidase inhibitor activity	negative regulation of endopeptidase activity, platelet degranulation	55.0351	21	48511.2	7.50244	-0.0686183	8.06254e-10
Q06033	ITIH3	7.24186	7.24352	7.13777	6.14982	5.66662	6.10457	4.4493	5.89475	6.27004	5.53794		5.75921	6.14226	6.01689	6.14158	6.02564	6.31077	6.74897	6.68415	6.18285	Inter-alpha-trypsin inhibitor heavy chain H3	extracellular exosome, extracellular region, platelet dense granule lumen	endopeptidase inhibitor activity, serine-type endopeptidase inhibitor activity	hyaluronan metabolic process, platelet degranulation	24.0449	20	99786.5	5.34229	-0.335169	8.58474e-10
P00915	CA1	6.97405	7.19979	7.00121	5.62137				5.56889	6.59759			5.29655	5.87666				5.78164	6.92071	6.62061	6.12733	Carbonic anhydrase 1	cytosol, extracellular exosome	arylesterase activity, carbonate dehydratase activity, hydro-lyase activity, zinc ion binding	bicarbonate transport, interleukin-12-mediated signaling pathway, one-carbon metabolic process	62.069	11	28852.4	6.66162	-0.536398	9.10119e-10
P07360	C8G	6.85458	6.74552	5.9468	5.84741	6.05941	6.57777	6.61228	5.33154	6.59705	6.04226	6.49577	4.60183	6.65869	6.91429	6.95603	5.40788	7.46582	7.56215	7.46248	5.81342	Complement component C8 gamma chain	blood microparticle, extracellular exosome, extracellular region, membrane attack complex	retinol binding	complement activation, alternative pathway, complement activation, classical pathway, cytolysis, regulation of complement activation	49.0099	8	22263.5	8.37061	-0.0589109	9.7073e-10
Q9Y277	VDAC3					6.39897	6.82368	6.88126	6.11206	6.7405	6.37732	6.79565	5.44019	6.90822	7.27038	7.10778		6.8895	6.10462	7.01308		Voltage-dependent anion-selective channel protein 3	extracellular exosome, mitochondrial outer membrane, mitochondrion, nucleus, pore complex	nucleotide binding, porin activity, voltage-gated anion channel activity	adenine transport, behavioral fear response, learning, neuron-neuron synaptic transmission, regulation of cilium assembly	40.9894	8	30639.3	8.7876	-0.279505	1.03239e-09
Q00610	CLTC		6.42377	5.82725	5.815	6.49879	6.95039	6.96289	6.28903	6.99494	6.73506	7.2069	5.99319	7.06927	7.27841	7.44104	6.07041	7.19883	6.42181	7.21915	6.20757	Clathrin heavy chain 1	clathrin coat, clathrin coat of coated pit, clathrin coat of trans-Golgi network vesicle, clathrin complex, clathrin-coated endocytic vesicle, clathrin-coated endocytic vesicle membrane, clathrin-coated vesicle, cytosol, endolysosome membrane, endosome, extracellular exosome, extracellular vesicle, focal adhesion, intracellular membrane-bounded organelle, lysosome, melanosome, membrane, mitotic s…	clathrin light chain binding, disordered domain specific binding, double-stranded RNA binding, low-density lipoprotein particle receptor binding, protein kinase binding, RNA binding, structural molecule activity, ubiquitin-specific protease binding	antigen processing and presentation of exogenous peptide antigen via MHC class II, autophagy, cell division, clathrin coat assembly, clathrin-dependent endocytosis, intracellular protein transport, low-density lipoprotein particle clearance, low-density lipoprotein particle receptor catabolic process, membrane organization, mitotic cell cycle, negative regulation of hyaluronan biosynthetic proces…	19.7015	28	191493	5.32861	-0.242746	1.09592e-09
P35443	THBS4	6.80319	6.68113	6.68662											5.88104							Thrombospondin-4	basement membrane, collagen-containing extracellular matrix, endoplasmic reticulum, extracellular exosome, extracellular region, extracellular space, sarcoplasmic reticulum	calcium ion binding, growth factor activity, heparin binding, integrin binding	behavioral response to pain, endothelial cell-cell adhesion, myoblast migration, negative regulation of angiogenesis, positive regulation of cell division, positive regulation of endothelial cell proliferation, positive regulation of neutrophil chemotaxis, positive regulation of peptidyl-tyrosine phosphorylation, regulation of tissue remodeling, response to endoplasmic reticulum stress, response …	15.2966	11	105802	4.09814	-0.534547	1.25085e-09
Q9UBW5	BIN2					5.86798	6.6637	6.34984	5.39861	6.1971	6.04417	6.15832		6.0666	6.42824	6.75087		6.85155		7.02942		Bridging integrator 2	cell cortex, cell junction, cell projection, extracellular region, ficolin-1-rich granule lumen, phagocytic cup, plasma membrane, podosome, secretory granule lumen	phospholipid binding	cell chemotaxis, neutrophil degranulation, phagocytosis, engulfment, plasma membrane tubulation, podosome assembly	24.7788	7	61836.8	4.90479	-0.860885	1.32822e-09
P30405	PPIF						6.37684	6.1398	5.7909	6.31991	6.35904	5.95434		6.41205	6.20964	6.76895		6.70621		6.90099		Peptidyl-prolyl cis-trans isomerase F, mitochondrial	membrane, mitochondrial inner membrane, mitochondrial matrix, mitochondrial permeability transition pore complex, mitochondrion	cyclosporin A binding, peptidyl-prolyl cis-trans isomerase activity, unfolded protein binding	apoptotic mitochondrial changes, cellular response to arsenic-containing substance, cellular response to calcium ion, cellular response to hydrogen peroxide, mitochondrial outer membrane permeabilization involved in programmed cell death, necroptotic process, negative regulation of apoptotic process, negative regulation of ATPase activity, negative regulation of intrinsic apoptotic signaling path…	34.2995	4	22026.2	9.79932	-0.191787	1.40577e-09
P61224	RAP1B	6.77545	6.67816	6.27068	5.31185	6.19663	6.74005	6.79195	6.32571	6.93893	6.12638	6.71678	5.64686	6.96714	7.101	7.17992	5.02954	7.10773	6.96032	7.21686	5.9938	Ras-related protein Rap-1b	azurophil granule membrane, cell-cell junction, cytosol, extracellular exosome, intracellular, lipid droplet, membrane, plasma membrane	GDP binding, GTP binding, GTPase activity, protein-containing complex binding	cell proliferation, cellular response to cAMP, cellular response to drug, cellular response to gonadotropin-releasing hormone, establishment of endothelial barrier, interleukin-12-mediated signaling pathway, negative regulation of synaptic vesicle exocytosis, neutrophil degranulation, positive regulation of ERK1 and ERK2 cascade, Rap protein signal transduction, regulation of cell junction assemb…	45.6522	7	20811.6	5.40381	-0.389674	1.48471e-09
Q86UX7	FERMT3	7.41206	7.33763	7.00406	5.68978	6.42973	7.21851	6.90526	6.31847	7.15903	6.62853	7.09878	5.65707	7.17443	7.23819	7.34311		7.46635	7.37213	7.51301	5.5621	Fermitin family homolog 3	cell junction, cell projection, extracellular exosome, extracellular region, membrane, platelet alpha granule lumen, podosome	integrin binding	integrin activation, integrin-mediated signaling pathway, leukocyte cell-cell adhesion, platelet aggregation, platelet degranulation, positive regulation of cell migration, regulation of cell-cell adhesion mediated by integrin, substrate adhesion-dependent cell spreading	37.1814	18	75905	6.5249	-0.383808	1.56737e-09
P08670	VIM	6.91441	7.10203	7.13466	7.18202	7.10508	7.13922	6.91248	7.09446	7.08645	7.13763	6.76237	7.01373	6.88282	6.88709	6.72356	7.2018	7.19419	7.28377	6.94433	7.10498	Vimentin	cell leading edge, cytoplasm, cytoskeleton, cytosol, extracellular exosome, focal adhesion, intermediate filament, neuron projection, nuclear matrix, peroxisome, phagocytic vesicle, plasma membrane, polysome, ribonucleoprotein complex	double-stranded RNA binding, identical protein binding, keratin filament binding, protein C-terminus binding, protein domain specific binding, scaffold protein binding, structural constituent of cytoskeleton, structural constituent of eye lens	astrocyte development, Bergmann glial cell differentiation, cellular response to interferon-gamma, cellular response to lipopolysaccharide, cellular response to muramyl dipeptide, cytokine-mediated signaling pathway, intermediate filament organization, lens fiber cell development, muscle filament sliding, negative regulation of neuron projection development, positive regulation of collagen biosyn…	61.588	30	53619.1	4.82275	-0.823176	1.65338e-09
P13725	OSM				6.97467	5.56461	6.6976	6.23559	6.73229	6.78198	6.08315	5.95536	6.52598	5.92934	6.569	6.13433	6.91017	7.00391	7.07707	6.97643	7.04682	Oncostatin-M	extracellular region, extracellular space	cytokine activity, growth factor activity, oncostatin-M receptor binding	cell proliferation, cytokine-mediated signaling pathway, immune response, multicellular organism development, negative regulation of cell proliferation, negative regulation of hormone secretion, oncostatin-M-mediated signaling pathway, positive regulation of acute inflammatory response, positive regulation of cell division, positive regulation of cell proliferation, positive regulation of inflamm…	59.9206	17	28466	11.1597	-0.555952	1.7407e-09
Q13201	MMRN1	6.25619	6.45646	4.9361		7.01494	7.47895	7.48535	6.39893	7.28871	7.13486	7.58106	5.41935	7.47845	7.67071	7.82111	5.24908	7.82139	7.38677	7.80111	5.00918	Multimerin-1	collagen-containing extracellular matrix, extracellular matrix, extracellular region, platelet alpha granule lumen	calcium ion binding, extracellular matrix structural constituent	blood coagulation, cell adhesion, platelet degranulation, positive regulation of cell-substrate adhesion	28.8274	34	138023	7.70068	-0.446824	1.83429e-09
P01011	SERPINA3	7.1014	7.31269	7.05344	6.81098	6.56404	7.21609	7.37506	6.98955	7.59747	6.96765	7.54399	6.68321	7.35934	7.56713	7.56388	7.05169	7.60412	7.86334	7.91057	7.20342	Alpha-1-antichymotrypsin	azurophil granule lumen, blood microparticle, collagen-containing extracellular matrix, extracellular exosome, extracellular region, extracellular space, intracellular, nucleus, platelet alpha granule lumen, secretory granule lumen	DNA binding, serine-type endopeptidase inhibitor activity	acute-phase response, inflammatory response, maintenance of gastrointestinal epithelium, negative regulation of endopeptidase activity, neutrophil degranulation, platelet degranulation, regulation of lipid metabolic process	32.3877	14	47620.5	5.13721	-0.0652482	1.96487e-09
P04083	ANXA1				6.0075				5.87358				5.38025				6.14645				5.68792	Annexin A1	apical plasma membrane, basolateral plasma membrane, cell surface, cell-cell adherens junction, collagen-containing extracellular matrix, cornified envelope, cytoplasm, cytoplasmic vesicle membrane, cytosol, early endosome membrane, endosome, extracellular exosome, extracellular region, extracellular space, extrinsic component of endosome membrane, extrinsic component of external side of plasma m…	cadherin binding involved in cell-cell adhesion, calcium ion binding, calcium-dependent phospholipid binding, calcium-dependent protein binding, DNA/DNA annealing activity, double-stranded DNA-dependent ATPase activity, phospholipase A2 inhibitor activity, phospholipid binding, protein binding, bridging, protein homodimerization activity, signaling receptor binding, single-stranded DNA binding, s…	actin cytoskeleton reorganization, adaptive immune response, alpha-beta T cell differentiation, arachidonic acid secretion, cell surface receptor signaling pathway, cellular response to glucocorticoid stimulus, cellular response to hydrogen peroxide, cellular response to vascular endothelial growth factor stimulus, cytokine-mediated signaling pathway, DNA duplex unwinding, endocrine pancreas deve…	23.4104	7	38690	6.61377	-0.419364	2.09472e-09
P67936	TPM4	6.89703	6.85144	6.33793	5.97864	6.74899	7.43191	7.03855	6.71628	7.36631	6.8203	7.35487	5.61336	7.1498	7.47151	7.66635		7.50623	6.61955	7.56358		Tropomyosin alpha-4 chain	actin filament, cortical cytoskeleton, cytoskeleton, cytosol, extracellular exosome, focal adhesion, membrane, muscle thin filament tropomyosin, podosome, stress fiber	actin filament binding, calcium ion binding, identical protein binding, protein heterodimerization activity, protein homodimerization activity, structural constituent of muscle	actin filament organization, muscle contraction, muscle filament sliding, osteoblast differentiation	53.2258	12	28504.5	4.43994	-1.02097	2.24109e-09
P63104	YWHAZ	7.33808	7.29867	7.05783	6.16155	6.69899	7.32541	7.21322	6.42299	7.25103	6.95788	7.25163	5.96066	7.07876	7.33021	7.45809	5.99785	7.3773	6.94357	7.40372	5.79752	14-3-3 protein zeta/delta	blood microparticle, cytoplasm, cytosol, extracellular exosome, extracellular space, focal adhesion, glutamatergic synapse, hippocampal mossy fiber to CA3 synapse, melanosome, mitochondrion, nucleoplasm, nucleus, vesicle	cadherin binding, identical protein binding, ion channel binding, protein domain specific binding, protein kinase binding, RNA binding, transcription factor binding, ubiquitin protein ligase binding	cytokine-mediated signaling pathway, establishment of Golgi localization, Golgi reassembly, membrane organization, negative regulation of apoptotic process, platelet activation, positive regulation of protein insertion into mitochondrial membrane involved in apoptotic signaling pathway, protein targeting, regulation of mRNA stability, regulation of synapse maturation, signal transduction, synapti…	40.4082	9	27727.7	4.48096	-0.620816	2.38983e-09
Q93084	ATP2A3	6.14601	6.07016	5.39536		6.6825	7.15383	7.21885	6.44566	6.97485	6.72679	7.30989	5.42892	7.05233	7.26678	7.57282		7.30645		7.35045	5.1287	Sarcoplasmic/endoplasmic reticulum calcium ATPase 3	endoplasmic reticulum, endoplasmic reticulum membrane, integral component of membrane, nuclear membrane, platelet dense tubular network membrane, sarcoplasmic reticulum, sarcoplasmic reticulum membrane	ATP binding, calcium-transporting ATPase activity, metal ion binding, proton-exporting ATPase activity, phosphorylative mechanism	calcium ion transmembrane transport, calcium ion transport, cellular calcium ion homeostasis, ion transmembrane transport, regulation of cardiac conduction	22.1477	22	113904	5.23291	0.0770853	2.54086e-09
P10909	CLU	8.99827	8.98147	8.66831	7.57236	8.1667	8.60002	8.71309	7.81387	8.79369	8.32139	8.77985	7.34379	8.71493	8.89025	8.93669	7.47175	8.93911	8.75184	9.10971	7.97789	Clusterin	apical dendrite, blood microparticle, cell surface, chromaffin granule, collagen-containing extracellular matrix, cytoplasm, cytosol, endoplasmic reticulum, extracellular exosome, extracellular region, extracellular space, Golgi apparatus, intracellular, mitochondrial membrane, mitochondrion, neurofibrillary tangle, nucleus, perinuclear region of cytoplasm, platelet alpha granule lumen, protein-c…	amyloid-beta binding, chaperone binding, low-density lipoprotein particle receptor binding, misfolded protein binding, protein heterodimerization activity, protein-containing complex binding, tau protein binding, ubiquitin protein ligase binding	antimicrobial humoral response, cell morphogenesis, central nervous system myelin maintenance, chaperone-mediated protein complex assembly, chaperone-mediated protein folding, chaperone-mediated protein transport involved in chaperone-mediated autophagy, complement activation, complement activation, classical pathway, innate immune response, intrinsic apoptotic signaling pathway, lipid metabolic …	46.3252	44	52461	5.82764	-0.664588	2.71318e-09
P60660	MYL6	7.12899	6.98304	6.64923	5.76859	7.53774	7.92067	7.75182	7.15825	7.71398	7.40803	7.85986	6.26524	7.7318	7.97974	8.04336	6.04328	7.86756	7.13924	7.8491	6.02683	Myosin light polypeptide 6	brush border, cytosol, extracellular exosome, membrane, myosin complex, unconventional myosin complex, vesicle	actin-dependent ATPase activity, calcium ion binding, motor activity, structural constituent of muscle	muscle contraction, muscle filament sliding, skeletal muscle tissue development	53.6424	12	16919.1	4.29639	-0.388742	3.09584e-09
P49908	SELENOP	6.7298	6.58201	6.37553	5.80665	6.84642	7.6846	7.31585	6.03916	7.70234	7.00234	7.33602	5.2708	7.5205	7.91876	7.89667		7.82113	8.0401	8.05266	5.54222	Selenoprotein P	extracellular exosome, extracellular region, extracellular space, platelet dense granule lumen	selenium binding	brain development, locomotory behavior, platelet degranulation, post-embryonic development, regulation of growth, response to oxidative stress, response to selenium ion, selenium compound metabolic process, sexual reproduction	32.8084	16	43156.3	7.59814	-0.642588	3.3105e-09
P16671	CD36	6.37122	6.41867	6.06587		6.84818	7.2489	7.34088	6.59417	7.28957	6.85262	7.26253	6.05556	7.22484	7.33098	7.5178	5.48947	7.45595	7.29692	7.60495	6.45617	Platelet glycoprotein 4	apical plasma membrane, brush border membrane, cell surface, endocytic vesicle membrane, external side of plasma membrane, extracellular space, Golgi apparatus, integral component of plasma membrane, intracellular, membrane, membrane raft, phagocytic vesicle, plasma membrane, platelet alpha granule membrane, receptor complex, specific granule membrane	amyloid-beta binding, high-density lipoprotein particle binding, lipid binding, lipoprotein particle binding, lipoteichoic acid receptor activity, low-density lipoprotein particle binding, low-density lipoprotein particle receptor activity, oxidised low-density lipoprotein particle receptor activity, scavenger receptor activity, thrombospondin receptor activity, Toll-like receptor binding, transf…	amyloid fibril formation, antigen processing and presentation of exogenous peptide antigen via MHC class I, TAP-dependent, apoptotic cell clearance, blood coagulation, cell adhesion, cellular response to amyloid-beta, cellular response to diacyl bacterial lipopeptide, cellular response to hydroperoxide, cellular response to lipopolysaccharide, cellular response to lipoteichoic acid, cellular resp…	19.4915	11	53019.3	7.78955	0.0146186	3.53559e-09
P23284	PPIB				5.8223			5.95347	5.96013	6.14215	6.30614	6.20597	5.82333	6.47467	6.96359	7.15813	5.76721	7.35157	7.25621	7.43327	6.06222	Peptidyl-prolyl cis-trans isomerase B	endoplasmic reticulum, endoplasmic reticulum chaperone complex, endoplasmic reticulum lumen, extracellular exosome, focal adhesion, melanosome, membrane, nucleus, perinuclear region of cytoplasm, protein-containing complex, smooth endoplasmic reticulum	cyclosporin A binding, peptidyl-prolyl cis-trans isomerase activity, RNA binding, RNA polymerase binding, unfolded protein binding	bone development, chaperone-mediated protein folding, positive regulation by host of viral genome replication, positive regulation by host of viral process, positive regulation of multicellular organism growth, protein peptidyl-prolyl isomerization, protein stabilization	47.2222	9	23727.5	9.88818	-0.197685	4.27269e-09
O94919	ENDOD1						6.36048	6.21193	5.60352	6.34778	5.93283	6.14175		6.25952	6.57727	6.74254		6.54459		6.69902		Endonuclease domain-containing 1 protein	cytosol, extracellular exosome, extracellular region, membrane	endonuclease activity, metal ion binding, nucleic acid binding	platelet degranulation	10	4	54981.3	5.34912	0.1358	4.80413e-09
P16615	ATP2A2					5.06529	5.90541	5.53734	5.75681	6.04732	6.36296	6.83732	5.07622	6.56215	6.82112	6.95846		6.79074		6.80283		Sarcoplasmic/endoplasmic reticulum calcium ATPase 2	apical ectoplasmic specialization, calcium ion-transporting ATPase complex, endoplasmic reticulum, endoplasmic reticulum membrane, extrinsic component of cytoplasmic side of plasma membrane, integral component of plasma membrane, longitudinal sarcoplasmic reticulum, membrane, nucleoplasm, perinuclear region of cytoplasm, plasma membrane bounded cell projection, platelet dense tubular network memb…	ATP binding, calcium ion binding, calcium-transporting ATPase activity, calcium-transporting ATPase activity involved in regulation of cardiac muscle cell membrane potential, enzyme binding, lutropin-choriogonadotropic hormone receptor binding, protein C-terminus binding, proton-exporting ATPase activity, phosphorylative mechanism, S100 protein binding	calcium ion import into sarcoplasmic reticulum, calcium ion transmembrane transport, calcium ion transport from cytosol to endoplasmic reticulum, cardiac muscle hypertrophy in response to stress, cell adhesion, cellular calcium ion homeostasis, cellular response to heat, cellular response to oxidative stress, endoplasmic reticulum calcium ion homeostasis, epidermis development, ER-nucleus signali…	9.59693	7	114683	5.01416	0.0966411	5.09234e-09
P80511	S100A12													6.0791	5.03203	6.19793		7.17392	7.4234	7.14858		Protein S100-A12	cytoplasm, cytoskeleton, cytosol, extracellular region, nucleus, plasma membrane, secretory granule lumen	calcium ion binding, copper ion binding, RAGE receptor binding, zinc ion binding	antimicrobial humoral immune response mediated by antimicrobial peptide, cytokine secretion, defense response to bacterium, defense response to fungus, inflammatory response, innate immune response, killing of cells of other organism, mast cell activation, monocyte chemotaxis, neutrophil chemotaxis, neutrophil degranulation, positive regulation of I-kappaB kinase/NF-kappaB signaling, positive reg…	39.1304	4	10568.5	5.79346	-0.4	5.68131e-09
P01127	PDGFB				7.51321	6.28773	7.02643	6.55212	7.27688	7.13924	6.34043	6.78817	7.04067	6.74822	7.21148	7.06399	7.68895	7.16341	7.4645	7.44892	7.71193	Platelet-derived growth factor subunit B	basolateral plasma membrane, cell surface, collagen-containing extracellular matrix, cytoplasm, endoplasmic reticulum lumen, extracellular region, extracellular space, Golgi lumen, Golgi membrane, platelet alpha granule lumen	chemoattractant activity, collagen binding, growth factor activity, identical protein binding, phosphatidylinositol-4,5-bisphosphate 3-kinase activity, platelet-derived growth factor binding, platelet-derived growth factor receptor binding, protein heterodimerization activity, protein homodimerization activity, Ras guanyl-nucleotide exchange factor activity, superoxide-generating NADPH oxidase ac…	activation of protein kinase activity, activation of protein kinase B activity, cell chemotaxis, cellular response to growth factor stimulus, cellular response to mycophenolic acid, embryonic placenta development, extracellular matrix organization, heart development, interleukin-18-mediated signaling pathway, MAPK cascade, metanephric glomerular mesangial cell development, monocyte chemotaxis, ne…	35.2697	15	27266.1	9.38916	-0.542739	6.30131e-09
P01040	CSTA				6.82402				6.14136				5.93457		6.13765		6.19638		6.04646		5.98627	Cystatin-A	cornified envelope, cytoplasm, cytosol, extracellular space, nucleus	cysteine-type endopeptidase inhibitor activity, protease binding, protein binding, bridging, structural molecule activity	cell-cell adhesion, cornification, keratinocyte differentiation, negative regulation of peptidase activity, negative regulation of proteolysis, peptide cross-linking	66.3265	5	10999.7	5.17822	-0.677551	6.62649e-09
P30041	PRDX6				5.897				6.00472		6.47547		6.00602		6.33578	6.54689	5.89511			6.54058	5.67449	Peroxiredoxin-6	azurophil granule lumen, cytoplasm, cytosol, extracellular exosome, extracellular region, extracellular space, membrane, nucleus, perinuclear region of cytoplasm	cadherin binding, calcium-independent phospholipase A2 activity, glutathione peroxidase activity, peroxidase activity, peroxiredoxin activity, phospholipase A2 activity (consuming 1,2-dipalmitoylphosphatidylcholine), phospholipase A2 activity consuming 1,2-dioleoylphosphatidylethanolamine), protein homodimerization activity, ubiquitin protein ligase binding	cell redox homeostasis, cellular oxidant detoxification, cellular response to oxidative stress, glycerophospholipid catabolic process, hydrogen peroxide catabolic process, neutrophil degranulation, positive regulation of mRNA splicing, via spliceosome, response to oxidative stress	53.125	9	25019.2	5.93701	-0.209821	6.95478e-09
P06576	ATP5F1B				5.9298	6.64695	7.03194	6.85702	6.42305	6.80211	6.76581	7.12029	6.27653	6.96845	7.29549	7.28562	6.29315	7.20227		7.16822	6.24131	ATP synthase subunit beta, mitochondrial	cell surface, extracellular exosome, membrane, mitochondrial matrix, mitochondrial membrane, mitochondrial nucleoid, mitochondrial proton-transporting ATP synthase complex, mitochondrial proton-transporting ATP synthase, catalytic core, mitochondrion, myelin sheath, nucleus, plasma membrane, proton-transporting ATP synthase complex	angiostatin binding, ATP binding, MHC class I protein binding, proton-transporting ATP synthase activity, rotational mechanism, proton-transporting ATPase activity, rotational mechanism, transmembrane transporter activity, transporter activity	angiogenesis, ATP biosynthetic process, cristae formation, generation of precursor metabolites and energy, lipid metabolic process, mitochondrial ATP synthesis coupled proton transport, mitochondrion organization, negative regulation of cell adhesion involved in substrate-bound cell migration, osteoblast differentiation, positive regulation of blood vessel endothelial cell migration, proton trans…	29.3006	13	56524.6	5.05518	0.0181474	7.30106e-09
P06733	ENO1	6.4962	6.44484	6.3897	6.4932	6.23476	6.14251	6.17263	6.31351	6.48819	6.44828	6.06963	6.23838	6.29761	6.41904	6.60699	6.56178	6.58998	6.83571	6.72996	6.49822	Alpha-enolase	cell cortex region, cell surface, cytoplasm, cytosol, extracellular exosome, extracellular space, M band, membrane, nucleus, phosphopyruvate hydratase complex, plasma membrane	cadherin binding, DNA-binding transcription repressor activity, RNA polymerase II-specific, GTPase binding, magnesium ion binding, phosphopyruvate hydratase activity, protein homodimerization activity, proximal promoter DNA-binding transcription repressor activity, RNA polymerase II-specific, RNA binding, RNA polymerase II regulatory region sequence-specific DNA binding	canonical glycolysis, gluconeogenesis, negative regulation of cell growth, negative regulation of hypoxia-induced intrinsic apoptotic signaling pathway, negative regulation of transcription by RNA polymerase II, negative regulation of transcription, DNA-templated, positive regulation of ATP biosynthetic process, positive regulation of muscle contraction, positive regulation of plasminogen activat…	41.4747	14	47139.3	7.09912	-0.221429	7.65796e-09
Q6UWP8	SBSN				6.63327	4.44942	6.04088	5.47898	5.44371	5.32114		5.00412	5.19079	5.05824	5.71481		5.89463	5.56149	5.53145	5.60933	5.45409	Suprabasin	extracellular exosome			49.8305	15	60504.6	6.51807	-0.687288	8.02419e-09
P22105	TNXB	6.62463	6.78902	6.63634														6.43007	6.69608			Tenascin-X	collagen-containing extracellular matrix, extracellular exosome, extracellular matrix, extracellular region, extracellular space, intracellular	collagen fibril binding, extracellular matrix structural constituent, heparin binding, integrin binding	actin cytoskeleton organization, cell adhesion, collagen fibril organization, collagen metabolic process, elastic fiber assembly	5.91423	10	458100	4.82275	-0.513761	8.39062e-09
P00558	PGK1				5.54002				5.95621		5.96593	6.70395	5.83853				6.00326	6.55755	6.7667		5.93282	Phosphoglycerate kinase 1	cytosol, extracellular exosome, extracellular space, membrane, membrane raft	ADP binding, ATP binding, phosphoglycerate kinase activity, protein-disulfide reductase activity	canonical glycolysis, cellular response to hypoxia, chemical synaptic transmission, epithelial cell differentiation, gluconeogenesis, glycolytic process, muscle cell cellular homeostasis, myoblast fusion, negative regulation of angiogenesis, phosphorylation, plasminogen activation, somatic muscle development	25.8993	8	44586.1	8.02197	-0.0779376	8.76276e-09
P15169	CPN1	6.51553	6.81686	6.12984	5.95388					5.9995		4.7306		6.47703	6.97111	6.6087		6.88609	7.12067	7.13193		Carboxypeptidase N catalytic chain	extracellular region, extracellular space	metallocarboxypeptidase activity, zinc ion binding	bradykinin catabolic process, peptide metabolic process, protein processing, regulation of complement activation, response to glucocorticoid	19.869	9	52253.3	6.90771	-0.475546	9.13514e-09
P48735	IDH2	6.72863	6.63869	6.16983	5.59876	6.7871	7.21668	7.24733	6.21984	7.09202	6.80142	7.32391	5.62908	7.14969	7.31119	7.45767	5.59546	7.29865	6.96034	7.33792	5.51214	Isocitrate dehydrogenase [NADP], mitochondrial	cytosol, extracellular exosome, mitochondrial matrix, mitochondrion, peroxisome	isocitrate dehydrogenase (NADP+) activity, magnesium ion binding, NAD binding, protein homodimerization activity	2-oxoglutarate metabolic process, carbohydrate metabolic process, glyoxylate cycle, isocitrate metabolic process, NADP biosynthetic process, NADP metabolic process, negative regulation of glial cell migration, negative regulation of glial cell proliferation, negative regulation of matrix metallopeptidase secretion, tricarboxylic acid cycle	39.6018	15	50876.9	8.81494	-0.397345	9.93066e-09
P35542	SAA4	8.55001	8.6338	8.30277	7.49699	7.2253	7.25812	7.34412	6.87888	7.71342	6.9479	7.58804	6.43115	7.37372	7.5386	7.78434	6.11002	7.91553	7.74167	8.04895	7.08162	Serum amyloid A-4 protein	extracellular exosome, extracellular region, extracellular space, high-density lipoprotein particle	chemoattractant activity	acute-phase response, cell chemotaxis	53.0769	12	14737.3	9.40967	-0.519231	1.03707e-08
Q15517	CDSN				6.48553								5.48118				6.04847					Corneodesmosin	cell-cell junction, cornified envelope, desmosome, extracellular region, plasma membrane	protein homodimerization activity	cell adhesion, cell-cell adhesion, corneocyte desquamation, cornification, epidermis development, keratinocyte differentiation, negative regulation of cornification, skin morphogenesis	9.64083	4	51490.2	8.15869	-0.343289	1.18513e-08
P07237	P4HB	6.84032	6.8715	6.7215	6.09481	6.902	7.55757	7.37218	6.22177	7.28328	7.2681	7.40698	5.98159	7.39439	7.90542	7.98875	6.21466	7.50766	7.10615	8.07605	6.15749	Protein disulfide-isomerase	endoplasmic reticulum, endoplasmic reticulum chaperone complex, endoplasmic reticulum lumen, endoplasmic reticulum-Golgi intermediate compartment, external side of plasma membrane, extracellular exosome, extracellular region, focal adhesion, melanosome, procollagen-proline 4-dioxygenase complex	enzyme binding, integrin binding, peptide disulfide oxidoreductase activity, procollagen-proline 4-dioxygenase activity, protein disulfide isomerase activity, protein heterodimerization activity, RNA binding	cell redox homeostasis, cellular protein metabolic process, cellular response to hypoxia, chylomicron assembly, interleukin-12-mediated signaling pathway, interleukin-23-mediated signaling pathway, peptidyl-proline hydroxylation to 4-hydroxy-L-proline, positive regulation of viral entry into host cell, post-translational protein modification, protein folding, regulation of oxidative stress-induce…	31.2992	13	57080.7	4.50146	-0.430512	1.23932e-08
P22891	PROZ	7.91162	8.02186	7.74265	6.10588	4.27362									5.83567							Vitamin K-dependent protein Z	endoplasmic reticulum lumen, extracellular exosome, extracellular space, Golgi lumen	calcium ion binding, serine-type endopeptidase activity	blood coagulation, ER to Golgi vesicle-mediated transport	31.25	10	44714.7	5.5542	-0.27025	1.29324e-08
P00746	CFD	6.33991				6.40181	7.30262	7.08705		7.26409	6.50088	7.16418		7.19526	7.36331	7.35464		7.52317	7.4127	7.55295		Complement factor D	extracellular exosome, extracellular region, ficolin-1-rich granule lumen, platelet alpha granule lumen, secretory granule lumen	serine-type endopeptidase activity, serine-type peptidase activity	complement activation, complement activation, alternative pathway, neutrophil degranulation, platelet degranulation, proteolysis	44.664	7	27015.9	7.43408	-0.0992095	1.34772e-08
Q15113	PCOLCE														5.76212	6.34718		6.77803	6.82714	6.83025		Procollagen C-endopeptidase enhancer 1	extracellular exosome, extracellular region, extracellular space	collagen binding, extracellular matrix structural constituent, heparin binding, peptidase activator activity	cellular response to leukemia inhibitory factor, multicellular organism development, proteolysis	10.4677	4	47942	7.14697	-0.285523	1.4025e-08
P05089	ARG1				6.40969	4.60608	6.48903		5.55542				5.43427		5.65959		6.00833				5.97894	Arginase-1	azurophil granule lumen, cytoplasm, cytosol, extracellular region, extracellular space, mitochondrial outer membrane, neuron projection, neuronal cell body, nucleus, specific granule lumen	arginase activity, manganese ion binding	adaptive immune response, aging, arginine catabolic process, arginine catabolic process to ornithine, cellular response to dexamethasone stimulus, cellular response to glucagon stimulus, cellular response to hydrogen peroxide, cellular response to interleukin-4, cellular response to lipopolysaccharide, cellular response to transforming growth factor beta stimulus, collagen biosynthetic process, d…	34.472	9	34713.3	6.81201	-0.163975	1.45788e-08
P12882	MYH1											7.41133										Myosin-1	A band, cytoplasmic ribonucleoprotein granule, intercalated disc, muscle myosin complex, myosin filament	actin filament binding, ATP binding, calmodulin binding, motor activity	muscle contraction	4.74471	5	223006	5.43115	-0.777256	1.51876e-08
P36955	SERPINF1	8.10055	7.77605	7.52533	6.64058	5.87499			5.9936				5.77629				5.9194	6.5273	6.91478	6.64929	6.04399	Pigment epithelium-derived factor	axon hillock, basement membrane, collagen-containing extracellular matrix, extracellular exosome, extracellular region, extracellular space, melanosome, perinuclear region of cytoplasm	serine-type endopeptidase inhibitor activity	aging, cell proliferation, cellular response to cobalt ion, cellular response to dexamethasone stimulus, cellular response to glucose stimulus, cellular response to retinoic acid, kidney development, multicellular organism development, negative regulation of angiogenesis, negative regulation of endopeptidase activity, negative regulation of endothelial cell migration, negative regulation of epith…	35.4067	15	46283.3	5.92334	-0.163876	1.64797e-08
P11021	HSPA5	5.46258	6.21064	5.91824	6.43658	6.47459	7.01467	6.78253	6.22223	6.72484	6.62094	6.90206	5.93366	6.76958	6.97459	7.10436	6.14054	7.03987	6.37004	7.13399	6.02347	Endoplasmic reticulum chaperone BiP	cell surface, cytoplasm, endoplasmic reticulum, endoplasmic reticulum chaperone complex, endoplasmic reticulum lumen, endoplasmic reticulum membrane, endoplasmic reticulum-Golgi intermediate compartment, extracellular exosome, focal adhesion, integral component of endoplasmic reticulum membrane, melanosome, membrane, midbody, mitochondrion, myelin sheath, nucleus, plasma membrane, protein-contain…	ATP binding, ATPase activity, ATPase activity, coupled, cadherin binding, calcium ion binding, chaperone binding, enzyme binding, heat shock protein binding, misfolded protein binding, protein binding involved in protein folding, protein domain specific binding, ribosome binding, ubiquitin protein ligase binding, unfolded protein binding	ATF6-mediated unfolded protein response, cellular response to antibiotic, cellular response to calcium ion, cellular response to cAMP, cellular response to drug, cellular response to gamma radiation, cellular response to glucose starvation, cellular response to heat, cellular response to interleukin-4, cellular response to manganese ion, cellular response to nerve growth factor stimulus, cellular…	38.685	24	72288.4	4.82275	-0.486697	1.78444e-08
P01019	AGT	6.90545	6.7518	6.62021	6.16916	6.38681	6.81429	6.38189	6.37819	7.09258	6.57539	6.61812	5.99522	6.88161	7.10213	6.98103	6.45787	6.98529	7.10283	7.25752	6.59039	Angiotensinogen	blood microparticle, cytosol, extracellular exosome, extracellular region, extracellular space	growth factor activity, hormone activity, receptor ligand activity, serine-type endopeptidase inhibitor activity, sodium channel regulator activity, superoxide-generating NADPH oxidase activator activity, type 1 angiotensin receptor binding, type 2 angiotensin receptor binding	activation of phospholipase C activity, aging, angiotensin-activated signaling pathway, angiotensin-mediated drinking behavior, artery smooth muscle contraction, associative learning, blood vessel remodeling, cell growth involved in cardiac muscle cell development, cell surface receptor signaling pathway, cell-cell signaling, cellular response to angiotensin, cellular response to mechanical stimu…	16.2887	7	53120.5	5.83447	0.0645361	1.8572e-08
P14625	HSP90B1	7.34772	7.35293	7.01541	6.18344	6.33083	6.79447	6.97664	6.3189	6.77073	6.655	7.01155	6.01655	6.82268	7.08982	7.3667	5.83787	7.09619	6.21915	7.19463	6.05765	Endoplasmin	collagen-containing extracellular matrix, cytosol, endocytic vesicle lumen, endoplasmic reticulum, endoplasmic reticulum chaperone complex, endoplasmic reticulum lumen, endoplasmic reticulum membrane, extracellular exosome, extracellular region, focal adhesion, melanosome, membrane, midbody, nucleus, perinuclear region of cytoplasm, plasma membrane, protein-containing complex	ATP binding, calcium ion binding, low-density lipoprotein particle receptor binding, protein phosphatase binding, RNA binding, unfolded protein binding	actin rod assembly, ATF6-mediated unfolded protein response, cellular protein metabolic process, cellular response to ATP, cytokine-mediated signaling pathway, negative regulation of apoptotic process, post-translational protein modification, protein folding in endoplasmic reticulum, protein transport, receptor-mediated endocytosis, regulation of phosphoprotein phosphatase activity, response to e…	28.3935	21	92411.3	4.51514	-0.712702	1.93563e-08
P25311	AZGP1				6.83491		6.06699	5.6739	6.48744	6.55195		6.17077	6.20037	6.54613	6.76274	6.32208	6.73219	6.49107	6.72331	6.55877	6.65059	Zinc-alpha-2-glycoprotein	collagen-containing extracellular matrix, extracellular exosome, extracellular region, extracellular space, nucleus, plasma membrane	protein transmembrane transporter activity, ribonuclease activity	cell adhesion, detection of chemical stimulus involved in sensory perception of bitter taste, immune response, negative regulation of cell proliferation, retina homeostasis, transmembrane transport	38.255	11	34237.1	5.61572	-0.575839	2.02022e-08
P05155	SERPING1	8.36819	8.40412	8.16375	6.95467	6.44605	7.05727	7.30703	6.51292	7.2834	6.56196	7.11892	6.27186	7.67077	7.84909	7.2399	6.64815	7.32702	7.55048	7.36424	6.7347	Plasma protease C1 inhibitor	blood microparticle, collagen-containing extracellular matrix, extracellular exosome, extracellular region, extracellular space, platelet alpha granule lumen	serine-type endopeptidase inhibitor activity	aging, blood circulation, blood coagulation, intrinsic pathway, complement activation, classical pathway, fibrinolysis, innate immune response, negative regulation of complement activation, lectin pathway, negative regulation of endopeptidase activity, platelet degranulation, regulation of complement activation	35.2	20	55119.4	6.07373	-0.125	2.10501e-08
P04792	HSPB1		6.93409		6.11748				5.88926		6.39921		6.25169		6.89589		6.61802	6.68279	6.67866		6.29065	Heat shock protein beta-1	axon cytoplasm, cytoplasm, cytoskeleton, cytosol, extracellular exosome, extracellular space, focal adhesion, nucleus, plasma membrane, proteasome complex, spindle, Z disc	identical protein binding, protein binding involved in protein folding, protein homodimerization activity, protein kinase binding, protein kinase C binding, protein kinase C inhibitor activity, RNA binding, ubiquitin binding	anterograde axonal protein transport, cellular response to vascular endothelial growth factor stimulus, chaperone-mediated protein folding, intracellular signal transduction, negative regulation of apoptotic process, negative regulation of oxidative stress-induced intrinsic apoptotic signaling pathway, negative regulation of protein kinase activity, platelet aggregation, positive regulation of an…	47.8049	8	22768.5	5.95068	-0.566829	2.28147e-08
P19961	AMY2B				5.905				4.90765				5.00586				6.63517				5.10624	Alpha-amylase 2B	extracellular exosome	alpha-amylase activity, alpha-amylase activity (releasing maltohexaose), metal ion binding	carbohydrate metabolic process	15.8513	6	57673	6.64795	-0.417025	2.38949e-08
P02775	PPBP				5.57068	6.69431	7.31189	7.1052	6.65631	7.34393	6.87324	7.13729	5.83661	7.35344	7.47022	7.59735	5.65857	8.02713	8.30598	8.25199	6.12362	Platelet basic protein	extracellular region, extracellular space, platelet alpha granule, platelet alpha granule lumen, tertiary granule lumen	chemokine activity, glucose transmembrane transporter activity, growth factor activity	antimicrobial humoral immune response mediated by antimicrobial peptide, cellular response to lipopolysaccharide, chemokine-mediated signaling pathway, defense response to bacterium, G protein-coupled receptor signaling pathway, glucose transmembrane transport, immune response, inflammatory response, killing of cells of other organism, leukocyte chemotaxis, neutrophil chemotaxis, neutrophil degra…	42.9688	6	13885.4	9.01318	-0.216406	2.49696e-08
P02763	ORM1	6.95425	7.0938	6.82133	6.97316	7.19173	7.75474	7.87494	7.41636	8.30131	7.48504	8.08033	6.91391	8.02029	8.0342	8.24013	7.12674	8.35912	8.39081	8.41098	7.49869	Alpha-1-acid glycoprotein 1	blood microparticle, collagen-containing extracellular matrix, extracellular exosome, extracellular region, extracellular space, platelet alpha granule lumen, specific granule lumen, tertiary granule lumen		acute-phase response, inflammatory response, negative regulation of interleukin-6 production, negative regulation of tumor necrosis factor production, neutrophil degranulation, platelet degranulation, positive regulation of interleukin-1 beta secretion, positive regulation of interleukin-1 secretion, positive regulation of tumor necrosis factor secretion, regulation of immune system process	35.8209	9	23496.8	4.69971	-0.535821	2.60792e-08
P35858	IGFALS	7.33248	7.22527	7.1219	5.84919	5.68157	6.46703	6.04858	4.72739	6.31168	5.95112	6.21541	5.29168	6.36621	6.50342	6.37867	5.21755	6.43848	6.64279	6.73454		Insulin-like growth factor-binding protein complex acid labile subunit	extracellular exosome, extracellular matrix, extracellular region, extracellular space, insulin-like growth factor ternary complex, nucleoplasm	insulin-like growth factor binding	cell adhesion, cellular protein metabolic process, signal transduction	29.5868	17	65993.8	6.31982	0.018843	2.71933e-08
Q9UK55	SERPINA10	6.52204	6.61668	6.13347		6.8355	7.66807	7.2069		6.55816	5.90726	6.23266	4.43381	5.90971	6.31409	6.45637	5.41503	6.44245	6.80189	6.36274	5.53522	Protein Z-dependent protease inhibitor	endoplasmic reticulum lumen, extracellular exosome, extracellular space	heparin binding, serine-type endopeptidase inhibitor activity	blood coagulation, cellular protein metabolic process, negative regulation of endopeptidase activity, post-translational protein modification	34.9099	14	50674.2	8.521	-0.231081	3.07847e-08
P22692	IGFBP4					5.92528	7.17295	6.88771		7.04656	6.36772	6.6164		7.39427	7.60756	7.59614		7.83577	7.89158	7.76527		Insulin-like growth factor-binding protein 4	endoplasmic reticulum lumen, extracellular region, extracellular space	insulin-like growth factor I binding, insulin-like growth factor II binding, signaling receptor binding	cell proliferation, cellular protein metabolic process, DNA metabolic process, inflammatory response, negative regulation of canonical Wnt signaling pathway, positive regulation of insulin-like growth factor receptor signaling pathway, positive regulation of MAPK cascade, post-translational protein modification, regulation of cell growth, regulation of glucose metabolic process, signal transducti…	57.7519	15	27915.5	6.74365	-0.493023	3.20333e-08
P18065	IGFBP2									6.56504				6.19413	6.46236				6.62826			Insulin-like growth factor-binding protein 2	apical plasma membrane, cytoplasmic vesicle, extracellular exosome, extracellular region, extracellular space	insulin-like growth factor I binding, insulin-like growth factor II binding, signaling receptor binding	aging, cellular protein metabolic process, cellular response to hormone stimulus, female pregnancy, negative regulation of canonical Wnt signaling pathway, positive regulation of activated T cell proliferation, regulation of cell growth, regulation of insulin-like growth factor receptor signaling pathway, response to drug, response to estradiol, response to estrogen, response to glucocorticoid, r…	23.6923	4	34791.2	7.17432	-0.439692	3.3594e-08
O00391	QSOX1																	7.02552	7.14603	6.83376		Sulfhydryl oxidase 1	endoplasmic reticulum lumen, extracellular exosome, extracellular region, extracellular space, Golgi apparatus, integral component of Golgi membrane, intercellular bridge, intracellular membrane-bounded organelle, platelet alpha granule lumen, specific granule lumen, tertiary granule lumen	flavin-linked sulfhydryl oxidase activity, protein disulfide isomerase activity	cell redox homeostasis, cellular protein metabolic process, negative regulation of macroautophagy, neutrophil degranulation, platelet degranulation, post-translational protein modification	23.0254	15	82525.5	9.04053	-0.191432	3.53395e-08
P05156	CFI				5.60008			4.11424	6.19391	6.49489	5.52434	4.23601	5.63001	6.20075	5.8937		6.28757	6.61361	7.03882	6.96065	6.35735	Complement factor I	extracellular exosome, extracellular region, extracellular space, membrane	metal ion binding, scavenger receptor activity, serine-type endopeptidase activity	complement activation, classical pathway, innate immune response, regulation of complement activation	22.6415	11	65706.6	7.18115	-0.320755	3.7097e-08
O95810	CAVIN2	6.27055				6.67451	7.04056	7.22111	6.4451	7.29478	6.82733	7.46564	5.78636	7.26705	7.51766	7.71011	5.28791	7.62419	7.21792	7.63531	5.77919	Caveolae-associated protein 2	actin cytoskeleton, caveola, cytoplasm, cytosol, membrane raft, nucleoplasm, plasma membrane	phosphatidylserine binding, phospholipid binding, protein kinase C binding	plasma membrane tubulation	19.2941	8	47144.6	4.93213	-0.916471	3.88696e-08
Q15166	PON3	7.63648	7.48697	7.25877	6.1972	5.76039		5.58493	5.33523				4.50704	5.80615		5.67563	5.17509	5.63372	6.12823	5.87192	5.61186	Serum paraoxonase/lactonase 3	extracellular exosome, extracellular region, extracellular space, intracellular membrane-bounded organelle	3,4-dihydrocoumarin hydrolase activity, acyl-L-homoserine-lactone lactonohydrolase activity, aryldialkylphosphatase activity, arylesterase activity, metal ion binding, protein homodimerization activity	aromatic compound catabolic process, carboxylic acid catabolic process, coumarin catabolic process, lipoxygenase pathway, negative regulation of superoxide anion generation, phenylacetate catabolic process, response to toxic substance	44.6328	15	39582.3	5.06201	-0.020904	4.06536e-08
Q08380	LGALS3BP	7.51106	7.41397	7.28257	5.05524	5.47916			4.76525								5.18534			6.11546	5.51296	Galectin-3-binding protein	blood microparticle, collagen-containing extracellular matrix, extracellular exosome, extracellular region, extracellular space, membrane, platelet dense granule lumen	scavenger receptor activity	cell adhesion, cellular defense response, platelet degranulation, signal transduction	18.4615	9	65289.3	4.88428	-0.13453	4.2441e-08
O00299	CLIC1			5.67308	4.89998	5.93344	6.59797	6.55726	5.74881	6.62243	6.15805	6.61734	5.56052	6.43105	6.74814	6.92059	5.3553	6.85498	6.53284	6.89223	5.85478	Chloride intracellular channel protein 1	blood microparticle, brush border, chloride channel complex, cytoplasm, extracellular exosome, extracellular space, membrane, mitochondrion, nuclear envelope, nuclear membrane, nucleus, perinuclear region of cytoplasm, plasma membrane, vesicle	cadherin binding, chloride channel activity, voltage-gated ion channel activity	chloride transport, platelet aggregation, positive regulation of osteoblast differentiation, regulation of cell cycle, regulation of ion transmembrane transport, regulation of mitochondrial membrane potential, signal transduction	34.0249	7	26905.7	4.86377	-0.283817	4.42225e-08
P14923	JUP				7.25849				6.06175				6.15003		6.59032		6.82277	6.22229	6.28979		6.46702	Junction plakoglobin	actin cytoskeleton, apicolateral plasma membrane, catenin complex, cell-cell adherens junction, cell-cell junction, cornified envelope, cytoplasm, cytoplasmic side of plasma membrane, cytoskeleton, cytosol, desmosome, extracellular exosome, extracellular region, fascia adherens, ficolin-1-rich granule lumen, focal adhesion, gamma-catenin-TCF7L2 complex, intercalated disc, intermediate filament, l…	alpha-catenin binding, cadherin binding, cell adhesion molecule binding, cell adhesive protein binding involved in bundle of His cell-Purkinje myocyte communication, nuclear hormone receptor binding, protein homodimerization activity, protein kinase binding, protein phosphatase binding, structural constituent of cell wall, structural molecule activity, transcription coactivator activity	adherens junction organization, bundle of His cell-Purkinje myocyte adhesion involved in cell communication, cell migration, cell-cell adhesion, cellular response to indole-3-methanol, cornification, cytoskeletal anchoring at plasma membrane, desmosome assembly, detection of mechanical stimulus, endothelial cell-cell adhesion, keratinization, negative regulation of blood vessel endothelial cell m…	41.3423	30	81692.7	5.68408	-0.15745	4.59996e-08
Q9BWP8	COLEC11	7.73065	7.67538	7.48498	5.78898	5.69423	6.15641												5.41254			Collectin-11	collagen trimer, extracellular region, extracellular space	calcium ion binding, calcium-dependent carbohydrate binding, DNA binding, fucose binding, mannose binding, monosaccharide binding, oligosaccharide binding, serine-type endopeptidase activity	antimicrobial humoral response, complement activation, complement activation, lectin pathway, developmental process, execution phase of apoptosis, multicellular organism development, receptor-mediated endocytosis	26.9373	6	28647	5.04834	-0.450554	4.80447e-08
P01344	IGF2						5.88102	5.92577				6.36251		6.65012	7.216	6.29712		7.59499	7.76624	7.59551		Insulin-like growth factor II	extracellular region, extracellular space, platelet alpha granule lumen	growth factor activity, hormone activity, insulin receptor binding, insulin-like growth factor receptor binding, integrin binding, protein serine/threonine kinase activator activity, receptor ligand activity	animal organ morphogenesis, cellular protein metabolic process, embryonic placenta development, embryonic placenta morphogenesis, exocrine pancreas development, glucose metabolic process, in utero embryonic development, insulin receptor signaling pathway, insulin receptor signaling pathway via phosphatidylinositol 3-kinase, multicellular organism development, negative regulation of transcription …	19.4444	4	20127.3	9.56006	-0.275	5.00766e-08
P12830	CDH1					5.916	7.10982	6.54269		7.77467	6.86718	7.27656		7.25889	7.57785	7.76242		7.67724	7.98171	7.84279		Cadherin-1	actin cytoskeleton, apical junction complex, catenin complex, cell junction, cell surface, cell-cell adherens junction, cytoplasm, cytoplasmic side of plasma membrane, endosome, extracellular exosome, extracellular region, flotillin complex, glutamatergic synapse, integral component of membrane, lamellipodium, lateral plasma membrane, perinuclear region of cytoplasm, plasma membrane, postsynapse,…	ankyrin binding, beta-catenin binding, cadherin binding, calcium ion binding, cell adhesion molecule binding, cytoskeletal protein binding, gamma-catenin binding, GTPase activating protein binding, identical protein binding, protein homodimerization activity	adherens junction organization, calcium-dependent cell-cell adhesion via plasma membrane cell adhesion molecules, cell-cell adhesion, cell-cell adhesion mediated by cadherin, cell-cell junction assembly, cellular response to indole-3-methanol, cellular response to lithium ion, entry of bacterium into host cell, extracellular matrix organization, homophilic cell adhesion via plasma membrane adhesi…	6.34921	10	97395.9	4.28955	-0.351361	5.24272e-08
Q99715	COL12A1																	6.20862	6.46195			Collagen alpha-1(XII) chain	collagen type XII trimer, collagen-containing extracellular matrix, endoplasmic reticulum lumen, extracellular exosome, extracellular matrix, extracellular region, extracellular space, extracellular vesicle	extracellular matrix structural constituent conferring tensile strength	cell adhesion, collagen fibril organization, endodermal cell differentiation, growth plate cartilage chondrocyte morphogenesis, skeletal system development	3.49331	6	332941	5.16455	-0.426967	5.50307e-08
Q9NYL9	TMOD3						6.66943	6.32353	5.44234	6.65733	6.21388	6.58333		6.30618	6.42513	6.76274						Tropomodulin-3	cell-cell adherens junction, myofibril, striated muscle thin filament	actin binding, cadherin binding involved in cell-cell adhesion, tropomyosin binding	erythrocyte development, muscle contraction, myofibril assembly, pointed-end actin filament capping, positive regulation of mitotic cell cycle phase transition	10.5114	3	39570.3	4.85693	-0.583239	5.76396e-08
P07737	PFN1	7.43886	7.19135	7.03736	6.44197	6.46606	7.392	7.23241	6.43027	7.60979	7.09322	7.40662	6.34126	7.44894	7.67378	7.75595	6.48986	7.71523	7.69411	7.81293	6.49441	Profilin-1	blood microparticle, cell cortex, cytoplasm, cytoskeleton, cytosol, extracellular exosome, focal adhesion, glutamatergic synapse, membrane, nucleus	actin binding, actin monomer binding, adenyl-nucleotide exchange factor activity, cadherin binding, phosphatidylinositol-4,5-bisphosphate binding, proline-rich region binding, Rho GTPase binding, RNA binding	actin cytoskeleton organization, modification of postsynaptic actin cytoskeleton, negative regulation of actin filament bundle assembly, negative regulation of actin filament polymerization, negative regulation of stress fiber assembly, neural tube closure, positive regulation of actin filament bundle assembly, positive regulation of actin filament polymerization, positive regulation of ATPase ac…	54.2857	8	15044.6	8.35693	-0.116429	6.02872e-08
P12273	PIP				6.73111	6.14431			6.37985	5.99499		6.28875	6.19578		6.67375		6.79008	6.60721	6.76326	6.38197	6.80007	Prolactin-inducible protein	extracellular exosome, extracellular region, extracellular space, nucleus	actin binding, aspartic-type endopeptidase activity, IgG binding, protein dimerization activity	detection of chemical stimulus involved in sensory perception of bitter taste, negative regulation of T cell apoptotic process, positive regulation of gene expression, proteolysis, retina homeostasis, transmembrane transport	52.7397	7	16561.8	7.96729	0.175342	6.59189e-08
P02743	APCS	6.55341			5.86554		6.43324		6.20933	6.25722			5.34133	6.10325	6.32204		6.08869	6.16465	6.49047	6.52581	6.18409	Serum amyloid P-component	blood microparticle, collagen-containing extracellular matrix, extracellular exosome, extracellular region, extracellular space, nucleus	calcium ion binding, carbohydrate binding, complement component C1q binding, identical protein binding, low-density lipoprotein particle binding, unfolded protein binding, virion binding	acute-phase response, cellular protein metabolic process, chaperone-mediated protein complex assembly, complement activation, classical pathway, innate immune response, negative regulation by host of viral exo-alpha-sialidase activity, negative regulation by host of viral glycoprotein metabolic process, negative regulation of acute inflammatory response, negative regulation of exo-alpha-sialidase…	26.9058	5	25371.1	6.09424	-0.0784753	6.90392e-08
P18428	LBP	7.84074	7.9108	7.35752	5.77939	6.05267	6.56098	6.73763	5.46749	6.95916	6.32937	6.91193		7.04062	7.28033	7.17497	5.36491	7.18413	7.26509	7.31859	5.73497	Lipopolysaccharide-binding protein	cell surface, extracellular exosome, extracellular region, extracellular space, membrane	lipopeptide binding, lipopolysaccharide binding, lipoteichoic acid binding, signaling receptor binding	acute-phase response, cellular defense response, cellular response to lipopolysaccharide, cellular response to lipoteichoic acid, cytokine-mediated signaling pathway, defense response to Gram-negative bacterium, defense response to Gram-positive bacterium, detection of molecule of bacterial origin, innate immune response, leukocyte chemotaxis involved in inflammatory response, lipopolysaccharide …	22.4532	14	53349.9	6.23096	0.0623701	7.22308e-08
P0DJI8	SAA1	8.12455	8.28425	7.91868						6.44504		6.49607				6.87244		6.6547	6.27663	7.00264		Serum amyloid A-1 protein	cytoplasmic microtubule, endocytic vesicle lumen, extracellular exosome, extracellular region, extracellular space, high-density lipoprotein particle	chemoattractant activity, G protein-coupled receptor binding, heparin binding	activation of MAPK activity, acute-phase response, cell chemotaxis, cellular protein metabolic process, cytokine-mediated signaling pathway, G protein-coupled receptor signaling pathway, innate immune response, lymphocyte chemotaxis, macrophage chemotaxis, negative regulation of inflammatory response, neutrophil chemotaxis, platelet activation, positive regulation of cell adhesion, positive regul…	33.6066	3	13523.5	6.34033	-0.504918	7.55228e-08
P07195	LDHB	6.48229	6.06576	6.11767	6.06534	5.99008		5.66015	5.9191	6.0834	5.95547		5.8005				6.05063	6.02988	6.29801	6.2996	6.07373	L-lactate dehydrogenase B chain	cytoplasm, cytosol, extracellular exosome, membrane, membrane raft	identical protein binding, L-lactate dehydrogenase activity	carbohydrate metabolic process, pyruvate metabolic process	12.5749	4	36615.1	5.61572	0.055988	7.94284e-08
P22735	TGM1				6.62001				5.37796				5.33734		6.02497		5.90453				5.76928	Protein-glutamine gamma-glutamyltransferase K	cornified envelope, cytosol, extracellular exosome, intrinsic component of membrane, plasma membrane	metal ion binding, protein-glutamine gamma-glutamyltransferase activity	cell envelope organization, cellular protein modification process, cornification, keratinocyte differentiation, peptide cross-linking, positive regulation of cell cycle, positive regulation of keratinocyte proliferation	12.6071	9	89730.3	5.58154	-0.390453	8.75542e-08
P14543	NID1	6.51677	6.56174	6.62942																		Nidogen-1	basement membrane, cell periphery, collagen-containing extracellular matrix, extracellular exosome, extracellular region	calcium ion binding, collagen binding, extracellular matrix structural constituent, laminin binding, laminin-1 binding, proteoglycan binding	basement membrane organization, cell-matrix adhesion, extracellular matrix organization, glomerular basement membrane development, positive regulation of cell-substrate adhesion	11.7883	9	136291	4.89795	-0.377947	9.19244e-08
O95445	APOM	8.70475	8.6996	8.34545	7.2234	7.08912	7.27086	7.49586	6.86898	7.86024	7.09544	7.54698	6.3779	7.47762	7.67839	7.88866	6.85124	7.89748	7.76511	8.00868	7.21948	Apolipoprotein M	discoidal high-density lipoprotein particle, extracellular region, high-density lipoprotein particle, low-density lipoprotein particle, spherical high-density lipoprotein particle, very-low-density lipoprotein particle	antioxidant activity, lipid transporter activity, phospholipid binding	cholesterol efflux, cholesterol homeostasis, high-density lipoprotein particle assembly, high-density lipoprotein particle clearance, high-density lipoprotein particle remodeling, lipoprotein metabolic process, negative regulation of plasma lipoprotein oxidation, response to glucose, retinoid metabolic process, reverse cholesterol transport	45.7447	12	21239.4	5.58838	-0.258511	9.65719e-08
Q9UHG3	PCYOX1	7.26452	7.37617	7.15009	5.99356	5.79837		6.03176	5.48513	6.51802	5.74953	6.27584	5.22619	6.12573	6.38867	6.45706	5.36989	6.69282	6.50415	6.78282	5.57618	Prenylcysteine oxidase 1	extracellular exosome, lysosome, plasma membrane, very-low-density lipoprotein particle	chloride-transporting ATPase activity, prenylcysteine oxidase activity	prenylated protein catabolic process, prenylcysteine catabolic process, prenylcysteine metabolic process	29.505	11	56603.7	5.73193	-0.0607921	1.01241e-07
Q08554	DSC1				6.94427		6.93941		5.48856				5.4393				6.1233				5.72757	Desmocollin-1	cornified envelope, desmosome, extracellular exosome, ficolin-1-rich granule membrane, gap junction, integral component of membrane, membrane, plasma membrane	calcium ion binding	cornification, homophilic cell adhesion via plasma membrane adhesion molecules, keratinization, neutrophil degranulation	18.9038	12	99923.7	5.0415	-0.441723	1.05928e-07
P33908	MAN1A1	6.9047	7.0011	6.58529																		Mannosyl-oligosaccharide 1,2-alpha-mannosidase IA	cytosol, endoplasmic reticulum, endoplasmic reticulum-Golgi intermediate compartment, extracellular exosome, Golgi apparatus, Golgi membrane, integral component of membrane, membrane	calcium ion binding, mannosidase activity, mannosyl-oligosaccharide 1,2-alpha-mannosidase activity	Golgi apparatus mannose trimming, N-glycan processing, protein glycosylation	10.2603	6	72922.3	6.00537	-0.265391	1.17395e-07
Q9BXN1	ASPN									6.89077	6.34395	6.54092		5.97378	6.45638			7.20677	7.42629	7.26477		Asporin	collagen-containing extracellular matrix, extracellular matrix	calcium ion binding, collagen binding, extracellular matrix structural constituent conferring compression resistance	bone mineralization, negative regulation of tooth mineralization, negative regulation of transforming growth factor beta receptor signaling pathway	29.2105	10	43389.3	6.63428	-0.348421	1.29912e-07
P04179	SOD2						6.26548	6.24008			5.72326	6.19844		6.53581	6.95107	6.63814		6.54402		6.68136		Superoxide dismutase [Mn], mitochondrial	extracellular exosome, mitochondrial matrix, mitochondrion	identical protein binding, manganese ion binding, metal ion binding, superoxide dismutase activity	acetylcholine-mediated vasodilation involved in regulation of systemic arterial blood pressure, age-dependent response to reactive oxygen species, aging, cellular response to oxidative stress, interleukin-12-mediated signaling pathway, negative regulation of cell proliferation, negative regulation of neuron apoptotic process, negative regulation of oxidative stress-induced intrinsic apoptotic sig…	17.1171	3	24734.6	8.32275	-0.406757	1.36835e-07
Q9ULV4	CORO1C					6.09731	6.88989	6.54457	6.11741	6.94305	6.52671	7.10221	5.29945	6.99978	7.25651	7.37322		7.23145	6.87845	7.25944		Coronin-1C	actin cytoskeleton, cell cortex, flotillin complex, focal adhesion, lamellipodium, lateral plasma membrane, ruffle membrane, sarcolemma, sarcomere, synapse	actin filament binding, Rac GTPase binding	actin cytoskeleton organization, activation of GTPase activity, establishment of protein localization, negative regulation of epithelial cell migration, negative regulation of focal adhesion assembly, negative regulation of protein kinase activity by regulation of protein phosphorylation, negative regulation of protein phosphorylation, negative regulation of substrate adhesion-dependent cell spre…	28.481	13	53215.1	6.64795	-0.348523	1.44357e-07
P60174	TPI1	5.94588	6.06737	6.1254	6.19359	5.87102	5.63816	5.68678	6.03457	5.72629	5.69321	6.89987	5.78665	5.47504	5.68446	5.59101	6.05363	5.85139	5.87407	5.78682	6.04462	Triosephosphate isomerase	cytosol, extracellular exosome, extracellular space, nucleus	triose-phosphate isomerase activity, ubiquitin protein ligase binding	canonical glycolysis, gluconeogenesis, glyceraldehyde-3-phosphate biosynthetic process, glycerol catabolic process, glycolytic process	37.0629	10	30771.7	5.52002	-0.166783	1.60112e-07
P09382	LGALS1	6.17964	6.24447	6.25511	6.46651	6.46003	6.44759	6.51433	6.6613	6.3166	6.33406	5.63146	6.41011	6.36579	6.40362	6.23046	6.54938	6.70487	6.71625	6.68387	6.62674	Galectin-1	cell surface, collagen-containing extracellular matrix, cytoplasm, cytosol, endoplasmic reticulum lumen, extracellular exosome, extracellular region, extracellular space, intracellular, nucleus	lactose binding, laminin binding, protein homodimerization activity, RNA binding	apoptotic process, cellular protein metabolic process, cellular response to glucose stimulus, cellular response to organic cyclic compound, myoblast differentiation, negative regulation of cell-substrate adhesion, negative regulation of neuron projection development, plasma cell differentiation, positive regulation of erythrocyte aggregation, positive regulation of I-kappaB kinase/NF-kappaB signa…	64.4444	7	14706.2	5.08252	-0.151111	1.87184e-07
Q01469	FABP5				6.81175			7.17642	6.39216	6.15717	5.71813	6.32432	6.30031	6.82155	7.57048		6.86994	6.49127	6.54406		6.41927	Fatty acid-binding protein 5	azurophil granule lumen, cell junction, cytoplasm, cytosol, extracellular exosome, extracellular region, nucleoplasm, nucleus, plasma membrane, postsynaptic density, postsynaptic membrane, secretory granule membrane, synapse	fatty acid binding, identical protein binding, lipid binding, retinoic acid binding	epidermis development, glucose homeostasis, glucose metabolic process, lipid metabolic process, negative regulation of glucose transmembrane transport, neutrophil degranulation, phosphatidylcholine biosynthetic process, positive regulation of cold-induced thermogenesis, positive regulation of peroxisome proliferator activated receptor signaling pathway, regulation of prostaglandin biosynthetic pr…	63.7037	8	15154.6	6.72314	-0.457778	1.96755e-07
P01833	PIGR				6.62763		6.28576		6.46267	6.53912	5.70664	6.07926	6.19153	6.00641	6.48244	6.25496	6.774	6.6913	6.84326	6.67998	6.6841	Polymeric immunoglobulin receptor	azurophil granule membrane, extracellular exosome, extracellular space, integral component of plasma membrane, plasma membrane, receptor complex	polymeric immunoglobulin receptor activity	detection of chemical stimulus involved in sensory perception of bitter taste, epidermal growth factor receptor signaling pathway, Fc receptor signaling pathway, immunoglobulin transcytosis in epithelial cells mediated by polymeric immunoglobulin receptor, neutrophil degranulation, receptor clustering, retina homeostasis	19.8953	13	83231.7	5.39697	-0.340707	2.06522e-07
P43652	AFM	5.74038	6.37771	6.3276	5.97728		6.13969	5.70863	6.22195	6.84898	6.16599	6.53618	5.87527	6.73554	6.4891	6.57322	6.28735	6.85976	7.34348	7.20797	6.45962	Afamin	blood microparticle, extracellular exosome, extracellular region, extracellular space	vitamin E binding	protein stabilization, protein transport within extracellular region, vitamin transport	28.7145	18	69024	5.51318	-0.388147	2.25973e-07
P06702	S100A9		6.44995		7.41354	6.31245	7.29301	6.67043	6.85438	7.42935	6.55205	7.04084	6.7368	7.07994	7.48629	7.312	7.11481	7.63566	7.81158	7.67374	7.1432	Protein S100-A9	cell junction, collagen-containing extracellular matrix, cytoplasm, cytoskeleton, cytosol, extracellular exosome, extracellular region, extracellular space, nucleoplasm, nucleus, plasma membrane, secretory granule lumen	antioxidant activity, arachidonic acid binding, calcium ion binding, microtubule binding, RAGE receptor binding, Toll-like receptor 4 binding, zinc ion binding	activation of cysteine-type endopeptidase activity involved in apoptotic process, antimicrobial humoral immune response mediated by antimicrobial peptide, antimicrobial humoral response, apoptotic process, autophagy, cell-cell signaling, chemokine production, cytokine production, defense response to bacterium, defense response to fungus, inflammatory response, innate immune response, leukocyte mi…	51.7544	7	13233.5	5.67041	-0.870175	2.36425e-07
P12883	MYH7											6.58634										Myosin-7	muscle myosin complex, myofibril, myosin complex, myosin filament, sarcomere, stress fiber, Z disc	actin filament binding, actin-dependent ATPase activity, ATP binding, ATPase activity, calmodulin binding, microfilament motor activity	adult heart development, ATP metabolic process, cardiac muscle contraction, cardiac muscle hypertrophy in response to stress, muscle contraction, muscle filament sliding, regulation of heart rate, regulation of slow-twitch skeletal muscle fiber contraction, regulation of the force of heart contraction, regulation of the force of skeletal muscle contraction, skeletal muscle contraction, striated m…	4.90956	6	222959	5.47217	-0.789457	2.46869e-07
O15335	CHAD													6.20859				6.98487	7.15972	6.92552		Chondroadherin	extracellular matrix, extracellular space		bone development, negative regulation of bone trabecula formation	16.7131	4	40450.3	9.7583	-0.239833	2.57809e-07
P24593	IGFBP5					5.69521	6.88834	6.50064		7.38039	6.05015	6.82828		7.40979	7.51048	7.6025		7.84431	8.01962	7.95885		Insulin-like growth factor-binding protein 5	endoplasmic reticulum lumen, extracellular region, extracellular space, insulin-like growth factor binding protein complex, insulin-like growth factor ternary complex	fibronectin binding, insulin-like growth factor I binding, insulin-like growth factor II binding	aging, cellular protein metabolic process, cellular response to cAMP, cellular response to organic cyclic compound, female pregnancy, glucose homeostasis, glucose metabolic process, hair follicle morphogenesis, intracellular signal transduction, lung alveolus development, mammary gland involution, negative regulation of cell migration, negative regulation of growth, negative regulation of insulin…	25.3676	13	30550	7.98096	-0.622794	2.799e-07
Q13228	SELENBP1				6.76742																	Methanethiol oxidase	cytosol, extracellular exosome, extracellular space, fibrillar center, membrane, nucleolus	methanethiol oxidase activity, selenium binding	protein transport	16.9492	7	52357.6	5.88916	-0.254449	2.91453e-07
P16452	EPB42						5.39922	5.4534	6.29855	6.70026	6.03387	5.91731	5.90342	6.28809	6.30075	6.61643	5.75694	6.97178	7.23655	7.02539	6.62832	Erythrocyte membrane protein band 4.2	cortical cytoskeleton, cytoskeleton, plasma membrane	ATP binding, protein-glutamine gamma-glutamyltransferase activity, structural constituent of cytoskeleton	cell morphogenesis, erythrocyte maturation, hemoglobin metabolic process, iron ion homeostasis, peptide cross-linking, regulation of cell shape, spleen development	26.0492	16	76960.7	7.87842	-0.229233	3.16423e-07
O15143	ARPC1B		6.35932				6.33627	6.20899		6.13666	5.50229	6.19977		6.00739		6.40254		6.47168	6.47076	6.54819		Actin-related protein 2/3 complex subunit 1B	actin cytoskeleton, Arp2/3 protein complex, cytosol, extracellular exosome, focal adhesion, nucleus, tubulobulbar complex	actin filament binding, structural constituent of cytoskeleton	Arp2/3 complex-mediated actin nucleation, ephrin receptor signaling pathway, Fc-gamma receptor signaling pathway involved in phagocytosis, response to estradiol, response to estrogen	19.6237	4	40923.4	8.16553	-0.198387	3.28812e-07
Q14574	DSC3	6.73875	6.52782	6.03532	6.40803							5.96719	4.36916	6.26993	6.37844	6.69728	5.86079	6.97527	6.93292	6.9495	5.37404	Desmocollin-3	cell junction, cell-cell junction, cornified envelope, cytoplasm, desmosome, extracellular region, integral component of membrane, membrane, plasma membrane	calcium ion binding, gamma-catenin binding	cell adhesion, cornification, homophilic cell adhesion via plasma membrane adhesion molecules, in utero embryonic development, keratinization, protein stabilization	9.04018	8	99906.2	5.67041	-0.397098	3.53469e-07
Q15582	TGFBI						5.60379							5.0755	6.10967	5.83885		6.41806	6.6038	6.53829		Transforming growth factor-beta-induced protein ig-h3	basement membrane, collagen-containing extracellular matrix, extracellular exosome, extracellular matrix, extracellular region, extracellular space, plasma membrane, trans-Golgi network	cell adhesion molecule binding, collagen binding, extracellular matrix binding, extracellular matrix structural constituent, integrin binding	angiogenesis, cell adhesion, cell proliferation, cellular protein metabolic process, chondrocyte differentiation, extracellular matrix organization, negative regulation of cell adhesion, response to stimulus, visual perception	9.0776	5	74634	7.42725	-0.0850659	3.9386e-07
P47929	LGALS7				6.51449			6.15912	5.69614	6.38283			6.0028		5.9939		6.89848	5.87949			6.16672	Galectin-7	cytoplasm, extracellular exosome, extracellular space, nucleus	carbohydrate binding	apoptotic process, heterophilic cell-cell adhesion via plasma membrane cell adhesion molecules	64.7059	9	15065.8	7.50928	-0.342647	4.08541e-07
P05090	APOD	8.27669	8.131	8.00445	7.57251	7.61196	8.19925	8.12325	7.68208	8.6151	7.91239	8.28495	7.34055	8.25727	8.25913	8.62519	7.64282	8.64927	8.60356	8.76828	7.84114	Apolipoprotein D	cytosolic ribosome, dendrite, endoplasmic reticulum, extracellular exosome, extracellular region, extracellular space, neuronal cell body, perinuclear region of cytoplasm	cholesterol binding, lipid transporter activity	aging, angiogenesis, brain development, glucose metabolic process, lipid metabolic process, negative regulation of cytokine production involved in inflammatory response, negative regulation of focal adhesion assembly, negative regulation of lipoprotein lipid oxidation, negative regulation of monocyte chemotactic protein-1 production, negative regulation of platelet-derived growth factor receptor …	40.2116	16	21261.8	4.82959	-0.0534392	4.23712e-07
P11171	EPB41								5.3009					5.85654	6.2505			6.63688	7.00493	6.62783	6.01491	Protein 4.1	cell cortex region, cell junction, cortical cytoskeleton, cytoplasmic side of plasma membrane, cytosol, nucleus, plasma membrane, postsynaptic density, protein-containing complex, spectrin-associated cytoskeleton	1-phosphatidylinositol binding, actin binding, calmodulin binding, phosphoprotein binding, protein C-terminus binding, protein N-terminus binding, spectrin binding, structural constituent of cytoskeleton	actin cytoskeleton organization, actomyosin structure organization, cell cycle, cell division, cortical actin cytoskeleton organization, positive regulation of protein binding, positive regulation of protein localization to cell cortex, protein-containing complex assembly, regulation of cell shape	8.21759	8	96957.3	5.23975	-0.770023	4.55437e-07
P27797	CALR	6.52904	6.50225	6.36016	5.62867	5.59752	6.34215	6.31997	6.36159	6.8454	6.68843	6.84619	6.19884	6.88731	6.95368	7.26083	5.89694	6.91153	5.92204	6.96264	5.92603	Calreticulin	acrosomal vesicle, cell surface, collagen-containing extracellular matrix, cytoplasm, cytosol, endocytic vesicle lumen, endoplasmic reticulum, endoplasmic reticulum lumen, endoplasmic reticulum quality control compartment, endoplasmic reticulum-Golgi intermediate compartment membrane, external side of plasma membrane, extracellular exosome, extracellular region, extracellular space, focal adhesio…	androgen receptor binding, calcium ion binding, carbohydrate binding, chaperone binding, complement component C1q binding, DNA binding, hormone binding, integrin binding, iron ion binding, mRNA binding, peptide binding, protein binding involved in protein folding, RNA binding, ubiquitin protein ligase binding, unfolded protein binding, zinc ion binding	antigen processing and presentation of exogenous peptide antigen via MHC class I, TAP-dependent, antigen processing and presentation of peptide antigen via MHC class I, ATF6-mediated unfolded protein response, cardiac muscle cell differentiation, cellular calcium ion homeostasis, cellular response to lithium ion, cellular senescence, chaperone-mediated protein folding, cortical actin cytoskeleton…	22.0624	7	48111.8	3.98877	-1.10432	4.74468e-07
P34096	RNASE4									6.00357				5.71442	6.29334	5.57647		6.41568	6.52227	6.14045		Ribonuclease 4	extracellular region	nucleic acid binding, ribonuclease A activity, ribonuclease activity	mRNA cleavage	38.7755	5	16829.4	9.09521	-0.372109	5.14807e-07
P68104	EEF1A1				6.5002		6.11374		6.38129		6.42434		6.22935				6.51632				6.38091	Elongation factor 1-alpha 1	cortical actin cytoskeleton, cytoplasm, cytoplasmic side of lysosomal membrane, cytosol, eukaryotic translation elongation factor 1 complex, extracellular exosome, extracellular region, extracellular space, ficolin-1-rich granule lumen, membrane, nucleolus, nucleus, plasma membrane, ruffle membrane, secretory granule lumen	GTP binding, GTPase activity, protein kinase binding, RNA binding, translation elongation factor activity, tRNA binding	cellular response to epidermal growth factor stimulus, neutrophil degranulation, regulation of chaperone-mediated autophagy, translation, translational elongation	13.8528	4	50109.1	9.36865	-0.257359	5.35018e-07
Q9NQ79	CRTAC1	6.59222	5.01961	4.87256		5.24497			5.46101	6.50678	6.05643	6.09121		6.48353	6.74567	6.86407		6.4049	6.25761	6.76788		Cartilage acidic protein 1	extracellular exosome, growth cone	calcium ion binding	axonal fasciculation, negative regulation of receptor binding, olfactory bulb development	6.35401	4	71375.8	4.6792	-0.307262	5.55102e-07
P23229	ITGA6					5.49877	6.68046	6.49324	5.84379	6.47068	6.22952	6.43951	5.10817	6.47653	6.79999	6.98446		6.90766	6.32628	7.01172	5.59269	Integrin alpha-6	basal plasma membrane, basement membrane, cell surface, cell-cell adherens junction, external side of plasma membrane, filopodium, focal adhesion, hemidesmosome, integrin alpha6-beta4 complex, plasma membrane	cadherin binding, insulin-like growth factor I binding, laminin binding, metal ion binding, neuregulin binding, protein-containing complex binding	amelogenesis, brown fat cell differentiation, cell-cell adhesion, cell-matrix adhesion, cell-substrate adhesion, cell-substrate junction assembly, cellular response to extracellular stimulus, cellular response to organic cyclic compound, digestive tract development, ectodermal cell differentiation, extracellular matrix organization, filopodium assembly, hemidesmosome assembly, integrin-mediated s…	12.1239	13	126526	6.15576	-0.404779	5.75342e-07
Q92496	CFHR4		7.08914	6.86035						6.7847	5.95481		5.44922			6.52261	5.73673				5.99264	Complement factor H-related protein 4	extracellular region	lipid transporter activity	regulation of complement activation	7.61246	3	65307.8	4.59717	-0.519896	5.95854e-07
P52907	CAPZA1								5.53544	5.98237						6.12064		5.84267				F-actin-capping protein subunit alpha-1	actin cortical patch, actin cytoskeleton, cytoskeleton, cytosol, extracellular exosome, extracellular region, F-actin capping protein complex, WASH complex	actin binding, actin filament binding, cadherin binding	actin cytoskeleton organization, antigen processing and presentation of exogenous peptide antigen via MHC class II, barbed-end actin filament capping, blood coagulation, cell junction assembly, ER to Golgi vesicle-mediated transport, innate immune response, interleukin-12-mediated signaling pathway, protein-containing complex assembly	14.3357	3	32902.3	5.2876	-0.668182	6.16674e-07
P10720	PF4V1									6.32714				6.46165	6.73225	6.88884		7.30598	7.37093	7.27466		Platelet factor 4 variant	extracellular space	chemokine activity, heparin binding	antimicrobial humoral immune response mediated by antimicrobial peptide, cellular response to lipopolysaccharide, chemokine-mediated signaling pathway, immune response, inflammatory response, leukocyte chemotaxis, neutrophil chemotaxis, platelet activation	25.9615	3	11545.3	9.4917	0.0990385	6.38336e-07
P11142	HSPA8	6.34312	6.38936		6.33948		6.11926		6.09599	6.24222	6.09508	5.8852	5.92186	5.97428	6.3511	6.45193	6.16871	6.60111	6.44838	6.60261	6.17824	Heat shock cognate 71 kDa protein	autophagosome, axon, blood microparticle, chaperone complex, clathrin-sculpted gamma-aminobutyric acid transport vesicle membrane, cytoplasm, cytosol, dendrite, extracellular exosome, extracellular region, extracellular space, ficolin-1-rich granule lumen, focal adhesion, glutamatergic synapse, glycinergic synapse, intracellular, late endosome, lumenal side of lysosomal membrane, lysosomal lumen,…	ATP binding, ATPase activity, ATPase activity, coupled, C3HC4-type RING finger domain binding, cadherin binding, chaperone binding, clathrin-uncoating ATPase activity, enzyme binding, G protein-coupled receptor binding, heat shock protein binding, MHC class II protein complex binding, misfolded protein binding, phosphatidylserine binding, protein binding involved in protein folding, protein bindi…	ATP metabolic process, axo-dendritic transport, cellular response to heat, cellular response to starvation, cellular response to unfolded protein, chaperone cofactor-dependent protein refolding, chaperone-mediated autophagy, chaperone-mediated autophagy translocation complex disassembly, chaperone-mediated protein transport involved in chaperone-mediated autophagy, cytokine-mediated signaling pat…	19.6594	9	70854.2	5.15088	-0.456037	6.60458e-07
P04439	HLA-A			5.3639		5.94874	6.65402	6.18342	5.22024	6.39941	4.44643	6.19975		6.33988	6.54896	6.91789		6.82777	6.32483	6.91476		HLA class I histocompatibility antigen, A-3 alpha chain	cell surface, early endosome membrane, endoplasmic reticulum, endoplasmic reticulum membrane, ER to Golgi transport vesicle membrane, Golgi apparatus, Golgi membrane, integral component of lumenal side of endoplasmic reticulum membrane, integral component of plasma membrane, membrane, MHC class I protein complex, phagocytic vesicle membrane, plasma membrane, recycling endosome membrane	beta-2-microglobulin binding, peptide antigen binding, TAP binding	antigen processing and presentation of exogenous peptide antigen via MHC class I, TAP-dependent, antigen processing and presentation of exogenous peptide antigen via MHC class I, TAP-independent, antigen processing and presentation of peptide antigen via MHC class I, immune response, interferon-gamma-mediated signaling pathway, protein ubiquitination, regulation of immune response, type I interfe…	19.4521	6	40815.2	5.5542	-0.49863	6.8271e-07
P29508	SERPINB3				6.31002				5.85659				5.36192		5.93145		6.11962				5.70273	Serpin B3	azurophil granule lumen, cytoplasm, cytoplasmic vesicle, extracellular exosome, extracellular region, extracellular space, nucleus, vesicle	cysteine-type endopeptidase inhibitor activity, protease binding, serine-type endopeptidase inhibitor activity, virus receptor activity	autocrine signaling, negative regulation of catalytic activity, negative regulation of endopeptidase activity, negative regulation of JUN kinase activity, negative regulation of peptidase activity, negative regulation of proteolysis, neutrophil degranulation, paracrine signaling, positive regulation of cell migration, positive regulation of cell proliferation, positive regulation of endopeptidase…	19.7436	6	44536.5	6.36084	-0.460513	7.30719e-07
P07384	CAPN1				6.18278	6.2132	6.95704	6.33887	5.71863	6.8774	6.43969	6.51796		6.61029	6.98866	6.93958	5.45227	7.04681	6.78757	6.9312	5.98889	Calpain-1 catalytic subunit	cytoplasm, cytosol, extracellular exosome, extracellular region, ficolin-1-rich granule lumen, focal adhesion, lysosome, membrane, mitochondrion, plasma membrane	calcium ion binding, calcium-dependent cysteine-type endopeptidase activity, endopeptidase activity	cornification, mammary gland involution, neutrophil degranulation, positive regulation of cell proliferation, proteolysis, receptor catabolic process, regulation of catalytic activity, regulation of macroautophagy, regulation of NMDA receptor activity, self proteolysis	19.3277	13	81838.2	5.30127	-0.357143	7.78273e-07
Q15084	PDIA6				6.05909				5.94146	6.21981	6.40786	6.32347	5.71105	6.35812	6.36975	6.36376	6.15092	6.54876		6.72495	6.21031	Protein disulfide-isomerase A6	cytosol, endoplasmic reticulum, endoplasmic reticulum chaperone complex, endoplasmic reticulum lumen, endoplasmic reticulum membrane, endoplasmic reticulum-Golgi intermediate compartment, extracellular exosome, extracellular space, melanosome, plasma membrane	peptide disulfide oxidoreductase activity, protein disulfide isomerase activity	cell redox homeostasis, cellular protein metabolic process, IRE1-mediated unfolded protein response, post-translational protein modification, protein folding	9.31818	3	48091.3	4.69287	-0.275	8.26973e-07
Q8NI99	ANGPTL6	6.759	6.56763	6.42516																		Angiopoietin-related protein 6	extracellular exosome, secretory granule		angiogenesis, cell differentiation	14.0426	5	51662.1	8.45264	-0.47766	8.51995e-07
P25815	S100P				6.15553																	Protein S100-P	cytoplasm, extracellular exosome, extracellular region, microvillus membrane, nuclear body, nucleus, secretory granule lumen	cadherin binding, calcium ion binding, calcium-dependent protein binding, magnesium ion binding, protein homodimerization activity, RAGE receptor binding, transition metal ion binding	endothelial cell migration, neutrophil degranulation, response to organic substance	30.5263	3	10393.2	4.47412	-0.12	8.77026e-07
P02750	LRG1								5.83142	6.35311				6.08228	5.93346		5.57617	6.25556	6.65266	6.75804	5.76622	Leucine-rich alpha-2-glycoprotein	extracellular exosome, extracellular region, extracellular space, ficolin-1-rich granule lumen, intracellular membrane-bounded organelle, membrane, specific granule lumen, tertiary granule lumen	transforming growth factor beta receptor binding	brown fat cell differentiation, neutrophil degranulation, positive regulation of angiogenesis, positive regulation of endothelial cell proliferation, positive regulation of transforming growth factor beta receptor signaling pathway, response to bacterium	13.8329	4	38154.1	6.48389	-0.143804	9.54164e-07
P07355	ANXA2	6.35555	6.1928	6.25475	6.88332	6.39796	6.07951	6.22337	6.38011	6.32313	6.44076	5.93911	6.36236	6.28657	6.42139	6.38123	6.53735	6.54608	6.62369	6.56149	6.48053	Annexin A2	azurophil granule lumen, basement membrane, basolateral plasma membrane, cell cortex, cell surface, cell-cell adherens junction, collagen-containing extracellular matrix, cytoplasm, cytosol, early endosome, endosome, extracellular exosome, extracellular region, extracellular space, extrinsic component of plasma membrane, late endosome membrane, lipid droplet, lysosomal membrane, macropinosome, me…	bone sialoprotein binding, cadherin binding involved in cell-cell adhesion, calcium channel activity, calcium ion binding, calcium-dependent phospholipid binding, calcium-dependent protein binding, cytoskeletal protein binding, identical protein binding, molecular function regulator, phosphatidylinositol-4,5-bisphosphate binding, phosphatidylserine binding, phospholipase A2 inhibitor activity, pr…	angiogenesis, biomineral tissue development, body fluid secretion, catabolism by host of symbiont protein, collagen fibril organization, endocardial cell differentiation, fibrinolysis, growth plate cartilage development, interleukin-12-mediated signaling pathway, membrane raft assembly, negative regulation by host of symbiont molecular function, negative regulation of development of symbiont invo…	62.2419	24	38579.8	7.68018	-0.524484	9.80127e-07
P31146	CORO1A						6.0847	5.68438		6.36761	5.28468	5.78443		6.09881		6.4032			6.23658		5.6338	Coronin-1A	actin filament, axon, cell-cell junction, cortical actin cytoskeleton, cytoplasm, cytosol, early endosome, extracellular exosome, glutamatergic synapse, immunological synapse, lamellipodium, membrane, phagocytic cup, phagocytic vesicle, phagocytic vesicle membrane, plasma membrane, protein-containing complex	actin binding, actin filament binding, actin monomer binding, cytoskeletal protein binding, myosin heavy chain binding, phosphatidylinositol 3-kinase binding, protein C-terminus binding, protein homodimerization activity, RNA binding	actin cytoskeleton organization, actin filament organization, calcium ion transport, cell-substrate adhesion, cellular response to interleukin-4, early endosome to recycling endosome transport, homeostasis of number of cells within a tissue, innate immune response, leukocyte chemotaxis, natural killer cell degranulation, negative regulation of actin nucleation, negative regulation of neuron apopt…	12.7983	4	50993.8	6.23096	-0.319306	1.00648e-06
P20851	C4BPB	6.99517	6.85063	6.72393	6.25934	6.75264	7.1937	6.90115	6.59679	7.1857	6.68956	7.12814	6.39828	7.19544	7.21807	7.40893	6.32963	7.75519	7.69077	7.57619	6.74345	C4b-binding protein beta chain	extracellular region, extracellular space, other organism cell, plasma membrane		blood coagulation, complement activation, classical pathway, innate immune response, negative regulation of complement activation, classical pathway, positive regulation of protein catabolic process, regulation of complement activation, regulation of opsonization	40.4762	11	28338.4	4.83643	-0.27619	1.06315e-06
Q00325	SLC25A3							6.05103	6.01422		5.8335	6.06288	5.63856	6.10362	6.81075	6.61876	5.52098	6.22449		6.28585	5.702	Phosphate carrier protein, mitochondrial	extracellular exosome, integral component of mitochondrial inner membrane, integral component of plasma membrane, membrane, mitochondrial inner membrane, mitochondrion, myelin sheath	inorganic phosphate transmembrane transporter activity, phosphate:proton symporter activity, protein-containing complex binding	phosphate ion transmembrane transport	9.94475	4	40068.7	9.68311	0.0237569	1.09281e-06
P00325	ADH1B																	6.28648	6.65588	5.9974		Alcohol dehydrogenase 1B	cytosol, nucleoplasm, plasma membrane	alcohol dehydrogenase activity, zinc-dependent, zinc ion binding	ethanol oxidation	12.8	3	39828.6	8.104	0.133867	1.12478e-06
P13929	ENO3											7.17413										Beta-enolase	cytosol, extracellular exosome, extracellular space, membrane, phosphopyruvate hydratase complex, plasma membrane	magnesium ion binding, phosphopyruvate hydratase activity, protein heterodimerization activity, protein homodimerization activity	aging, canonical glycolysis, gluconeogenesis, response to drug, skeletal muscle tissue regeneration	16.5899	7	46957.3	7.54346	-0.193548	1.15731e-06
Q06830	PRDX1				6.71338		6.43862		6.31217	6.31749	5.62554	5.35598	6.19179	6.01074	6.07115	6.54985	6.57131	6.01425		6.63009	6.46295	Peroxiredoxin-1	cytoplasm, cytosol, extracellular exosome, extracellular space, melanosome, myelin sheath, nucleus	cadherin binding, identical protein binding, peroxidase activity, RNA binding, thioredoxin peroxidase activity	cell proliferation, cell redox homeostasis, cellular response to oxidative stress, erythrocyte homeostasis, hydrogen peroxide catabolic process, natural killer cell activation, natural killer cell mediated cytotoxicity, regulation of NIK/NF-kappaB signaling, regulation of stress-activated MAPK cascade, removal of superoxide radicals, response to oxidative stress, retina homeostasis, skeletal syst…	52.2613	9	22096.3	8.12451	-0.264824	1.19313e-06
P25774	CTSS						6.71105			6.60639	6.07271	6.35909		6.50607	6.50808	6.77174		6.6504	6.51307	6.51486		Cathepsin S	collagen-containing extracellular matrix, endolysosome lumen, extracellular region, extracellular space, ficolin-1-rich granule lumen, intracellular membrane-bounded organelle, lysosomal lumen, lysosome, tertiary granule lumen	collagen binding, cysteine-type endopeptidase activity, fibronectin binding, laminin binding, proteoglycan binding, serine-type endopeptidase activity	adaptive immune response, antigen processing and presentation, antigen processing and presentation of exogenous peptide antigen via MHC class II, antigen processing and presentation of peptide antigen, basement membrane disassembly, cellular response to thyroid hormone stimulus, collagen catabolic process, extracellular matrix disassembly, immune response, neutrophil degranulation, positive regul…	20.5438	6	37471.3	8.20654	-0.497583	1.22972e-06
O43707	ACTN4	5.43083		5.79315		5.44332	6.43107	5.75821	5.45669	6.42376	6.02802	6.42666	5.11564	6.13306	6.0121	6.46462		6.47539	6.26942	6.48944	5.49755	Alpha-actinin-4	brush border, cell-cell junction, cortical cytoskeleton, cytoplasm, cytosol, extracellular exosome, extracellular region, extracellular space, focal adhesion, intracellular, neuron projection, nuclear body, nucleus, perinuclear region of cytoplasm, platelet alpha granule lumen, protein-containing complex, pseudopodium, ribonucleoprotein complex, stress fiber, Z disc	actin binding, actin filament binding, calcium ion binding, chromatin DNA binding, integrin binding, ion channel binding, nuclear hormone receptor binding, nuclear receptor transcription coactivator activity, nucleoside binding, protein homodimerization activity, protein N-terminus binding, retinoic acid receptor binding, RNA binding, RNA polymerase II regulatory region sequence-specific DNA bind…	actin filament bundle assembly, bicellular tight junction assembly, negative regulation of cellular component movement, negative regulation of substrate adhesion-dependent cell spreading, peroxisome proliferator activated receptor signaling pathway, platelet degranulation, positive regulation of cell migration, positive regulation of cellular component movement, positive regulation of NIK/NF-kapp…	14.9286	8	104788	5.08252	-0.636773	1.38613e-06
P22792	CPN2		5.87453		5.53552				5.54934				4.66566				5.29173				5.55188	Carboxypeptidase N subunit 2	blood microparticle, extracellular exosome, extracellular matrix, extracellular region, extracellular space	enzyme regulator activity, metallocarboxypeptidase activity	protein stabilization, regulation of complement activation	9.17431	4	60518.1	5.5542	0.0680734	1.42924e-06
P61604	HSPE1				6.04264		6.62672	6.57023	6.19674	6.46575	6.32568	6.3994	5.78113	6.4912	6.73484	6.84448	5.94601	6.73695	6.12954	6.80244	5.98115	10 kDa heat shock protein, mitochondrial	extracellular exosome, membrane, mitochondrial matrix, mitochondrion	ATP binding, chaperone binding, metal ion binding, RNA binding, unfolded protein binding	activation of cysteine-type endopeptidase activity involved in apoptotic process, chaperone cofactor-dependent protein refolding, osteoblast differentiation, protein folding, response to unfolded protein	47.0588	5	10924.9	9.50537	-0.0411765	1.51935e-06
P21796	VDAC1				5.74688	5.5618	6.13904	6.62234	5.93204	6.14311	6.07087	6.41898	5.65625	6.5251	6.88885	6.61865	5.72381	6.53174	5.71504	6.4079	5.77184	Voltage-dependent anion-selective channel protein 1	extracellular exosome, membrane, membrane raft, mitochondrial nucleoid, mitochondrial outer membrane, mitochondrial permeability transition pore complex, mitochondrion, nucleus, plasma membrane, pore complex	identical protein binding, ion channel binding, porin activity, protein kinase binding, voltage-gated anion channel activity	anion transport, apoptotic process, epithelial cell differentiation, macroautophagy, pyruvate metabolic process, regulation of autophagy of mitochondrion, viral process	36.3958	7	30753.6	8.87646	-0.410954	1.62235e-06
Q14697	GANAB								5.73997	6.24196	6.12468	6.49301	5.28573	6.44633	6.70947	6.72934	5.33644	6.5683		6.54995		Neutral alpha-glucosidase AB	endoplasmic reticulum lumen, extracellular exosome, glucosidase II complex, Golgi apparatus, intracellular membrane-bounded organelle, melanosome, membrane	carbohydrate binding, glucan 1,3-alpha-glucosidase activity, RNA binding	carbohydrate metabolic process, N-glycan processing	8.26271	7	106807	5.67041	-0.359004	1.85108e-06
Q96DA0	ZG16B				6.18747				5.2886								6.36724					Zymogen granule protein 16 homolog B	extracellular exosome, extracellular space	carbohydrate binding	retina homeostasis	15.8654	3	22724.6	7.57764	-0.163462	1.91614e-06
Q8WZ42	TTN						6.14494	5.91789	6.29485	6.78197	5.54817	6.22582	6.06296	6.3555	6.31823	6.29213	5.88759	6.80777	7.1741	6.76963	6.77213	Titin	condensed nuclear chromosome, cytosol, extracellular exosome, extracellular region, I band, M band, sarcomere, striated muscle thin filament, Z disc	actin filament binding, actinin binding, ATP binding, calcium ion binding, calmodulin binding, enzyme binding, identical protein binding, muscle alpha-actinin binding, protease binding, protein kinase binding, protein self-association, protein serine/threonine kinase activity, protein tyrosine kinase activity, structural constituent of muscle, structural molecule activity conferring elasticity, t…	cardiac muscle contraction, cardiac muscle fiber development, cardiac muscle hypertrophy, cardiac muscle tissue morphogenesis, cardiac myofibril assembly, detection of muscle stretch, mitotic chromosome condensation, muscle contraction, muscle filament sliding, platelet degranulation, positive regulation of gene expression, positive regulation of protein secretion, protein kinase A signaling, reg…	0.567686	8	3.81365e+06	5.93018	-0.467654	1.98162e-06
P11597	CETP	6.18595	6.18688	6.46694	4.97265	5.08715		5.91644		6.53661	5.58795	6.07625		6.10243	6.34442	6.37473	4.87845	6.51769	6.75598	6.7827	5.40164	Cholesteryl ester transfer protein	extracellular exosome, extracellular region, extracellular space, high-density lipoprotein particle, vesicle	cholesterol binding, cholesterol transporter activity, lipid binding, lipid transporter activity, phosphatidylcholine binding, phospholipid transporter activity, triglyceride binding	cholesterol homeostasis, cholesterol metabolic process, cholesterol transport, high-density lipoprotein particle remodeling, lipid homeostasis, lipid transport, low-density lipoprotein particle remodeling, negative regulation of macrophage derived foam cell differentiation, phosphatidylcholine metabolic process, phospholipid homeostasis, phospholipid transport, regulation of cholesterol efflux, r…	12.1704	7	54721.2	5.62939	0.175254	2.04918e-06
Q9P0L0	VAPA						5.54125	5.20253	5.57645	5.61887	5.21266	5.63374		6.06927	5.9799	6.29996		5.83845		5.94347		Vesicle-associated membrane protein-associated protein A	azurophil granule membrane, bicellular tight junction, endoplasmic reticulum, endoplasmic reticulum membrane, Golgi membrane, integral component of membrane, microtubule cytoskeleton, nuclear membrane, plasma membrane, vesicle	cadherin binding, FFAT motif binding, microtubule binding, protein domain specific binding, protein heterodimerization activity	cell death, COPII-coated vesicle budding, ER to Golgi vesicle-mediated transport, membrane fusion, negative regulation by host of viral genome replication, neuron projection development, neutrophil degranulation, positive regulation by host of viral genome replication, positive regulation by host of viral release from host cell, positive regulation of I-kappaB kinase/NF-kappaB signaling, protein …	17.6707	3	27875.2	8.84912	-0.467871	2.19914e-06
O75636	FCN3	6.77037	6.68433	6.72257	5.27696	5.09198	5.16824	5.62521	5.35538	5.7582	6.05584	6.3415		5.4333	6.47292	6.68016		6.20037	6.17132	6.5281		Ficolin-3	blood microparticle, collagen trimer, extracellular region	antigen binding, carbohydrate binding, metal ion binding, serine-type endopeptidase activity	complement activation, complement activation, lectin pathway, defense response to virus, negative regulation of RNA biosynthetic process, negative regulation of viral entry into host cell, recognition of apoptotic cell	14.3813	4	32882	6.20361	-0.446823	2.28647e-06
Q9HBI1	PARVB					6.37645	7.06799	6.67073	5.83113	6.95065	6.55225	6.84752		6.5248	7.17757	7.34001		7.12836		6.97161		Beta-parvin	actin cytoskeleton, cytoplasm, cytosol, focal adhesion, lamellipodium, plasma membrane, Z disc	actin binding	actin cytoskeleton reorganization, cell projection assembly, establishment or maintenance of cell polarity, establishment or maintenance of cell polarity regulating cell shape, lamellipodium assembly, substrate adhesion-dependent cell spreading	13.1868	4	41688.1	6.2583	-0.31044	2.46516e-06
Q14254	FLOT2				5.93989				5.79587	6.34657	5.72914	5.90211	5.34366	6.14575	6.1394	6.5639		6.5772	6.50793	6.50172	5.96711	Flotillin-2	acrosomal membrane, anchored component of presynaptic active zone membrane, basolateral plasma membrane, caveola, cell-cell adherens junction, cell-cell contact zone, cytoplasmic vesicle, dendrite cytoplasm, endocytic vesicle, endosome, extracellular exosome, flotillin complex, focal adhesion, glutamatergic synapse, lamellipodium, membrane, perinuclear region of cytoplasm, plasma membrane, uropod…	ionotropic glutamate receptor binding, protease binding, protein heterodimerization activity	anterograde dendritic transport, cell adhesion, epidermis development, membrane raft assembly, negative regulation of amyloid precursor protein catabolic process, negative regulation of gene expression, positive regulation of establishment of T cell polarity, protein localization to plasma membrane, protein localization to plasma membrane raft, protein stabilization, regulation of myoblast differ…	18.4579	6	47034.7	4.96631	-0.148131	2.67751e-06
Q99439	CNN2					6.18536	6.8054	6.40242	6.0183	6.74279	6.39729	6.64182	5.36105	6.54671	6.64747	7.16006		6.91595	6.25362	7.08136	5.79883	Calponin-2	cell-cell junction, cytoskeleton, extracellular region, focal adhesion, membrane, specific granule lumen, stress fiber, tertiary granule lumen	actin binding, cadherin binding, calmodulin binding	actomyosin structure organization, cellular response to mechanical stimulus, cytoskeleton organization, interleukin-12-mediated signaling pathway, neutrophil degranulation, regulation of actin filament-based process	24.2718	5	33675.3	7.01709	-0.577994	3.03908e-06
P36980	CFHR2	6.97465	7.08063	6.98197	5.9275				5.792				5.39336				5.77939	6.31976	6.49882		5.85638	Complement factor H-related protein 2	extracellular region, protein-containing complex	protein heterodimerization activity, protein homodimerization activity	negative regulation of protein binding, positive regulation of cytolysis, regulation of complement activation	13.7037	3	30630.6	5.95068	-0.444444	3.16004e-06
P07339	CTSD				7.30676				6.42117		5.14885		6.27735	5.41387	5.75561		6.7002	6.22777	6.15113		6.24386	Cathepsin D	collagen-containing extracellular matrix, extracellular exosome, extracellular region, extracellular space, ficolin-1-rich granule lumen, lysosomal lumen, lysosome, melanosome, membrane raft, specific granule lumen, tertiary granule lumen	aspartic-type endopeptidase activity, cysteine-type endopeptidase activity, serine-type endopeptidase activity	antigen processing and presentation of exogenous peptide antigen via MHC class II, collagen catabolic process, neutrophil degranulation, protein catabolic process, proteolysis	17.7184	9	44523.6	6.07373	0.0230583	3.28676e-06
P04040	CAT				6.31422				5.45918				5.23408				5.74737				5.51446	Catalase	cytosol, endoplasmic reticulum, extracellular exosome, extracellular region, ficolin-1-rich granule lumen, focal adhesion, Golgi apparatus, intracellular membrane-bounded organelle, lysosome, membrane, mitochondrial intermembrane space, peroxisomal matrix, peroxisomal membrane, peroxisome, plasma membrane, secretory granule lumen	aminoacylase activity, antioxidant activity, catalase activity, enzyme binding, heme binding, identical protein binding, metal ion binding, NADP binding, oxidoreductase activity, acting on peroxide as acceptor, protein homodimerization activity, signaling receptor binding	aerobic respiration, aging, cellular response to growth factor stimulus, cellular response to oxidative stress, cholesterol metabolic process, hemoglobin metabolic process, hydrogen peroxide catabolic process, negative regulation of apoptotic process, negative regulation of NF-kappaB transcription factor activity, neutrophil degranulation, osteoblast differentiation, positive regulation of cell d…	19.5446	10	59718.8	6.95557	-0.585579	3.4139e-06
P02545	LMNA			5.88549	6.25336	6.04794		5.84181	6.21216		6.12482	5.49877	5.96438	5.74087			6.17527		5.53646	6.09387	6.2128	Prelamin-A/C	cytosol, intermediate filament, lamin filament, nuclear envelope, nuclear lamina, nuclear membrane, nuclear speck, nucleoplasm, nucleus, perinuclear region of cytoplasm	identical protein binding, structural molecule activity	cellular protein localization, cellular response to hypoxia, establishment or maintenance of microtubule cytoskeleton polarity, IRE1-mediated unfolded protein response, mitotic nuclear envelope reassembly, muscle organ development, negative regulation of cardiac muscle hypertrophy in response to stress, negative regulation of cell proliferation, negative regulation of extrinsic apoptotic signalin…	26.2048	16	74094.7	6.57275	-0.862952	3.54196e-06
P01137	TGFB1						6.18047		5.57264			6.06915			6.65872	6.45518		6.40134		6.72992		Transforming growth factor beta-1 proprotein	axon, blood microparticle, cell surface, collagen-containing extracellular matrix, cytoplasm, extracellular matrix, extracellular region, extracellular space, Golgi lumen, neuronal cell body, nucleus, plasma membrane, platelet alpha granule lumen	antigen binding, cytokine activity, enzyme binding, growth factor activity, identical protein binding, protein heterodimerization activity, protein homodimerization activity, protein N-terminus binding, protein serine/threonine kinase activator activity, transforming growth factor beta receptor binding, type I transforming growth factor beta receptor binding, type II transforming growth factor be…	adaptive immune response based on somatic recombination of immune receptors built from immunoglobulin superfamily domains, aging, aortic valve morphogenesis, ATP biosynthetic process, branch elongation involved in mammary gland duct branching, cell cycle arrest, cell development, cell migration, cell-cell junction organization, cellular calcium ion homeostasis, cellular response to dexamethasone …	11.7949	5	44312.8	8.40479	-0.311282	3.67766e-06
P05164	MPO																	6.87694	7.03136	6.84238		Myeloperoxidase	azurophil granule, azurophil granule lumen, cytoplasm, extracellular exosome, extracellular region, extracellular space, intracellular membrane-bounded organelle, lysosome, nucleus, secretory granule	chromatin binding, heme binding, heparin binding, metal ion binding, peroxidase activity	aging, defense response, defense response to bacterium, defense response to fungus, hydrogen peroxide catabolic process, hypochlorous acid biosynthetic process, low-density lipoprotein particle remodeling, negative regulation of apoptotic process, negative regulation of growth of symbiont in host, neutrophil degranulation, oxidation-reduction process, removal of superoxide radicals, respiratory b…	13.1544	8	83814.8	8.99268	-0.268591	3.81262e-06
P31151	S100A7				7.11565				6.20736				6.18376		6.92864		6.41732	6.75068	6.06043		6.3643	Protein S100-A7	azurophil granule lumen, collagen-containing extracellular matrix, cytoplasm, cytosol, endoplasmic reticulum, extracellular region, extracellular space, focal adhesion, nucleus	calcium ion binding, RAGE receptor binding, zinc ion binding	angiogenesis, antimicrobial humoral immune response mediated by antimicrobial peptide, antimicrobial humoral response, defense response to Gram-negative bacterium, epidermis development, innate immune response, keratinocyte differentiation, neutrophil degranulation, positive regulation of ERK1 and ERK2 cascade, positive regulation of granulocyte chemotaxis, positive regulation of monocyte chemota…	42.5743	10	11463.6	6.32666	-0.750495	3.94918e-06
Q6Q788	APOA5	7.15708	7.19737	6.89959	5.77247	5.94567	6.36391					6.50065					6.03564			6.64556	6.22732	Apolipoprotein A-V	chylomicron, endoplasmic reticulum lumen, extracellular region, extracellular space, high-density lipoprotein particle, very-low-density lipoprotein particle	cholesterol binding, cholesterol transporter activity, enzyme activator activity, enzyme binding, heparin binding, lipase activator activity, lipase binding, lipid binding, lipoprotein lipase activator activity, lipoprotein particle receptor binding, low-density lipoprotein particle receptor binding, phosphatidylcholine binding, phosphatidylcholine-sterol O-acyltransferase activator activity, pho…	acylglycerol homeostasis, cellular protein metabolic process, cholesterol biosynthetic process, cholesterol efflux, cholesterol homeostasis, high-density lipoprotein particle assembly, lipid transport, lipoprotein metabolic process, phosphatidylcholine metabolic process, phospholipid efflux, positive regulation of cholesterol esterification, positive regulation of fatty acid biosynthetic process,…	28.6885	7	41187.1	5.95752	-0.564754	4.22516e-06
O75116	ROCK2											6.18635		5.82666	6.4184	6.45605		6.18122		6.21958		Rho-associated protein kinase 2	centrosome, cytoplasmic ribonucleoprotein granule, cytosol, nucleus, plasma membrane	ATP binding, metal ion binding, protein serine/threonine kinase activity, Rho GTPase binding, Rho-dependent protein serine/threonine kinase activity, RNA binding, structural molecule activity	aortic valve morphogenesis, cellular response to testosterone stimulus, centrosome duplication, cortical actin cytoskeleton organization, ephrin receptor signaling pathway, G protein-coupled receptor signaling pathway, I-kappaB kinase/NF-kappaB signaling, negative regulation of angiogenesis, negative regulation of bicellular tight junction assembly, negative regulation of biomineral tissue develo…	5.76369	6	160799	5.62939	-0.843156	4.51663e-06
P33151	CDH5	6.62884	5.62412	5.67612																		Cadherin-5	bicellular tight junction, catenin complex, cell junction, cell surface, cell-cell adherens junction, cell-cell junction, integral component of membrane, membrane, plasma membrane	beta-catenin binding, cadherin binding, calcium ion binding, cytoskeletal protein binding, ion channel binding, protein homodimerization activity, signaling receptor binding	adherens junction organization, blood vessel maturation, calcium-dependent cell-cell adhesion via plasma membrane cell adhesion molecules, cell-cell adhesion, cell-cell adhesion mediated by cadherin, cell-cell junction assembly, homophilic cell adhesion via plasma membrane adhesion molecules, negative regulation of inflammatory response, positive regulation of angiogenesis, positive regulation of…	6.5051	4	87474	5.01416	-0.424872	5.14117e-06
P51884	LUM				5.76807		6.22856	6.12491	5.86181	6.38892	5.99927			6.15907	6.12458	6.13144	5.90355	6.75346	7.15121	7.20001	6.10111	Lumican	collagen-containing extracellular matrix, extracellular exosome, extracellular matrix, extracellular region, extracellular space, fibrillar collagen trimer, Golgi lumen, lysosomal lumen	collagen binding, extracellular matrix structural constituent, extracellular matrix structural constituent conferring compression resistance	cartilage development, collagen fibril organization, extracellular matrix organization, keratan sulfate biosynthetic process, keratan sulfate catabolic process, positive regulation of transcription by RNA polymerase II, positive regulation of transforming growth factor beta1 production, response to growth factor, response to organic cyclic compound, visual perception	13.3136	5	38404.8	6.14893	-0.276331	5.30712e-06
P02654	APOC1	9.05073	9.01342	8.81507	7.43535	8.03593	8.12256	7.9533	7.63861	8.44885	7.62833	8.33986	6.70238	7.95865	8.17069	8.4584	7.26777	8.57551	8.51214	8.7226	7.82781	Apolipoprotein C-I	chylomicron, endoplasmic reticulum, extracellular region, high-density lipoprotein particle, very-low-density lipoprotein particle	fatty acid binding, lipase inhibitor activity, phosphatidylcholine binding, phosphatidylcholine-sterol O-acyltransferase activator activity, phospholipase inhibitor activity	cholesterol efflux, cholesterol metabolic process, chylomicron remnant clearance, high-density lipoprotein particle remodeling, lipid metabolic process, lipoprotein metabolic process, negative regulation of cholesterol transport, negative regulation of fatty acid biosynthetic process, negative regulation of lipid catabolic process, negative regulation of lipid metabolic process, negative regulati…	56.6265	12	9326.09	9.4165	-0.119277	5.473e-06
P31944	CASP14				6.89684				6.03356				5.68511				6.11435				5.93012	Caspase-14	cytoplasm, cytosol, keratin filament, mitochondrion, nucleus	cysteine-type endopeptidase activity, cysteine-type endopeptidase activity involved in apoptotic process, endopeptidase activity	apoptotic process, cornification, epidermis development, intrinsic apoptotic signaling pathway in response to DNA damage, keratinization	46.281	18	27662	5.26709	-0.560331	5.64853e-06
O00151	PDLIM1	5.47748		5.34834		6.17368	6.93853	6.8968	5.82463	6.64028	6.35731	6.76063	4.76077	6.47298	6.82085	7.09782		6.91429	6.37532	6.916		PDZ and LIM domain protein 1	cell-cell adherens junction, cytoskeleton, focal adhesion, transcription factor complex, Z disc	cadherin binding involved in cell-cell adhesion, metal ion binding, transcription coactivator activity	regulation of transcription, DNA-templated, response to hypoxia, response to oxidative stress	39.2097	9	36049	6.58643	-0.521884	6.00378e-06
O14818	PSMA7				6.06629												5.20076	6.4875	6.65028	6.6856		Proteasome subunit alpha type-7	cytoplasm, cytosol, extracellular exosome, nucleoplasm, nucleus, postsynapse, proteasome complex, proteasome core complex, proteasome core complex, alpha-subunit complex	endopeptidase activity, identical protein binding, threonine-type endopeptidase activity	post-translational protein modification, proteasomal protein catabolic process, proteasomal ubiquitin-independent protein catabolic process, proteasome-mediated ubiquitin-dependent protein catabolic process, protein deubiquitination, viral process	17.7419	4	27869.6	8.67139	-0.432258	6.38333e-06
Q05682	CALD1						5.93302		5.60159	5.77875	5.57421	5.6002	4.92959	5.75418	5.91594	6.01272		6.07667		6.36232		Caldesmon	actin cap, actin cytoskeleton, cytoskeleton, cytosol, intracellular membrane-bounded organelle, myofibril, plasma membrane	actin binding, cadherin binding, calmodulin binding, myosin binding, tropomyosin binding	muscle contraction	12.3581	7	93175.4	5.42432	-1.6918	6.57843e-06
P11166	SLC2A1						5.92638	6.15127	6.09438	6.63805	4.98405	6.36424	4.79725	6.16954	6.64648	6.4594	5.60293	6.85015	7.04293	6.98186	6.8436	Solute carrier family 2, facilitated glucose transporter member 1	apical plasma membrane, basolateral plasma membrane, blood microparticle, caveola, cortical actin cytoskeleton, cytosol, extracellular exosome, female pronucleus, Golgi membrane, integral component of plasma membrane, intercalated disc, melanosome, membrane, midbody, plasma membrane, sarcolemma, Z disc	D-glucose transmembrane transporter activity, dehydroascorbic acid transmembrane transporter activity, glucose transmembrane transporter activity, identical protein binding, kinase binding, protein self-association, xenobiotic transmembrane transporter activity	cellular hyperosmotic response, cellular response to glucose starvation, cellular response to mechanical stimulus, cerebral cortex development, female pregnancy, glucose transmembrane transport, L-ascorbic acid metabolic process, lactose biosynthetic process, protein-containing complex assembly, regulation of glucose transmembrane transport, regulation of insulin secretion, response to hypoxia, r…	9.14634	7	54048.5	8.82178	0.534146	6.96901e-06
Q13586	STIM1									6.42293	5.93522	6.65542		6.59531		6.59153		6.80546		6.7973		Stromal interaction molecule 1	cortical endoplasmic reticulum, endoplasmic reticulum, endoplasmic reticulum membrane, integral component of endoplasmic reticulum membrane, integral component of plasma membrane, microtubule, plasma membrane, plasma membrane raft, sarcoplasmic reticulum membrane	calcium channel regulator activity, calcium ion binding, identical protein binding, microtubule plus-end binding, protease binding	activation of store-operated calcium channel activity, cellular calcium ion homeostasis, detection of calcium ion, enamel mineralization, positive regulation of adenylate cyclase activity, positive regulation of angiogenesis, regulation of calcium ion transport, regulation of cardiac conduction, regulation of store-operated calcium entry, store-operated calcium entry	10.5109	4	77375.3	6.18311	-0.674307	7.80092e-06
P50552	VASP					5.69883		6.28037		6.19434	5.99037	6.40159		6.16391	6.36195	6.53274		6.51605		6.51815		Vasodilator-stimulated phosphoprotein	actin cytoskeleton, bicellular tight junction, cytosol, extracellular exosome, filopodium membrane, focal adhesion, lamellipodium membrane, plasma membrane	actin binding, cadherin binding, profilin binding, SH3 domain binding	actin polymerization or depolymerization, axon guidance, cell junction assembly, neural tube closure, positive regulation of actin filament polymerization, protein homotetramerization	15.2632	4	39805.1	9.34814	-0.748158	8.23438e-06
P81605	DCD			5.07557	7.84814	5.74927	6.02891	6.76119	7.69134	7.54994	6.83715	7.50121	7.29403	6.65832	7.44578	6.119	7.73702	7.67398	7.83908	7.52432	7.65067	Dermcidin	extracellular exosome, extracellular region, extracellular space	peptidase activity, RNA binding	antimicrobial humoral immune response mediated by antimicrobial peptide, antimicrobial humoral response, defense response to bacterium, defense response to fungus, defense response to Gram-negative bacterium, defense response to Gram-positive bacterium, killing of cells of other organism	46.3636	6	11276.8	6.09424	-0.224545	8.4544e-06
Q9HDC9	APMAP	6.95007	6.92543	6.57451		3.86762	5.26533		5.17945	5.8121	5.01995	5.03236			5.00255	5.26784		5.52652	6.01419	5.95922	4.84404	Adipocyte plasma membrane-associated protein	cell surface, endoplasmic reticulum, integral component of membrane, membrane	arylesterase activity, strictosidine synthase activity	biosynthetic process	18.9904	8	46450.8	5.71826	-0.186298	8.89795e-06
P02776	PF4						7.28318	7.22868	6.10076	7.91863	7.39266	7.53072	5.96806	8.1621	8.22973	8.33845	5.88384	8.61849	8.71626	8.67024	6.64565	Platelet factor 4	collagen-containing extracellular matrix, cytoplasm, extracellular region, extracellular space, other organism cytoplasm, platelet alpha granule lumen, symbiont-containing vacuole membrane	chemokine activity, CXCR3 chemokine receptor binding, heparin binding	adenylate cyclase-activating G protein-coupled receptor signaling pathway, antimicrobial humoral immune response mediated by antimicrobial peptide, cellular response to lipopolysaccharide, chemokine-mediated signaling pathway, cytokine-mediated signaling pathway, defense response to protozoan, G protein-coupled receptor signaling pathway, immune response, inflammatory response, killing by host of…	12.8713	4	10837.9	8.66455	0.351485	9.58231e-06
O00194	RAB27B	5.63603				6.22837	6.92544	6.96776	6.10717	6.67302	6.63057	7.14669	4.95656	6.91636	7.23724	7.13876		7.13729	5.85438	7.22753	5.63393	Ras-related protein Rab-27B	anchored component of synaptic vesicle membrane, apical plasma membrane, axon cytoplasm, extracellular exosome, Golgi apparatus, Golgi stack, melanosome, multivesicular body membrane, plasma membrane, platelet dense granule membrane, secretory granule, trans-Golgi network transport vesicle, zymogen granule membrane	GDP binding, GTP binding, GTPase activity, myosin V binding, protein domain specific binding	anterograde axonal protein transport, intracellular protein transport, melanosome transport, multivesicular body sorting pathway, platelet degranulation, positive regulation of exocytosis, Rab protein signal transduction, synaptic vesicle endocytosis	42.6606	9	24592.2	5.10986	-0.486697	9.81819e-06
P00918	CA2	6.81016	6.84022	6.03151																		Carbonic anhydrase 2	apical part of cell, axon, basolateral plasma membrane, cytoplasm, cytosol, extracellular exosome, microvillus, myelin sheath, plasma membrane	arylesterase activity, carbonate dehydratase activity, zinc ion binding	angiotensin-activated signaling pathway, bicarbonate transport, carbon dioxide transport, cellular response to fluid shear stress, kidney development, morphogenesis of an epithelium, odontogenesis of dentin-containing tooth, positive regulation of bone resorption, positive regulation of cellular pH reduction, positive regulation of dipeptide transmembrane transport, positive regulation of osteocl…	21.5385	4	29227.9	7.01709	-0.578846	1.03127e-05
Q03154	ACY1	6.29129	6.2875	5.90001																		Aminoacylase-1	cytosol, extracellular exosome	aminoacylase activity, identical protein binding, metal ion binding, metallopeptidase activity	cellular amino acid metabolic process, xenobiotic metabolic process	7.10784	3	45856	5.71826	-0.291912	1.0564e-05
P49913	CAMP	6.25129	6.07475	6.0571	5.11647	5.2545	5.25527	5.20796	5.3278	6.24045	4.90348	5.5795		5.95541	6.08758	6.17413		6.59925	6.59876	6.81862	5.77297	Cathelicidin antimicrobial peptide	extracellular exosome, extracellular region, extracellular space, intracellular, specific granule, specific granule lumen, tertiary granule lumen	lipopolysaccharide binding	antibacterial humoral response, antifungal humoral response, antimicrobial humoral immune response mediated by antimicrobial peptide, antimicrobial humoral response, chronic inflammatory response, cytolysis by host of symbiont cells, defense response to bacterium, defense response to Gram-negative bacterium, defense response to Gram-positive bacterium, innate immune response, innate immune respon…	35.8824	7	19289.2	9.86768	-0.441765	1.13972e-05
P61160	ACTR2								5.58641		5.62581		4.39694				5.06588	6.35683				Actin-related protein 2	actin cap, actin cytoskeleton, Arp2/3 protein complex, azurophil granule lumen, cytoplasm, cytosol, extracellular exosome, extracellular region, ficolin-1-rich granule lumen, focal adhesion, invadopodium, lamellipodium, membrane, nucleus, podosome core, postsynaptic density, site of double-strand break	actin binding, ATP binding, structural constituent of cytoskeleton	Arp2/3 complex-mediated actin nucleation, associative learning, asymmetric cell division, cellular response to interferon-gamma, cellular response to trichostatin A, cilium assembly, cytosolic transport, ephrin receptor signaling pathway, establishment or maintenance of cell polarity, Fc-gamma receptor signaling pathway involved in phagocytosis, meiotic chromosome movement towards spindle pole, m…	7.36041	3	44732.2	6.28564	-0.184772	1.20518e-05
P17936	IGFBP3			6.05149						6.3379		5.51028	4.48239	6.63338	7.07634	7.21582		7.69796	7.85114	7.77622	5.48327	Insulin-like growth factor-binding protein 3	endoplasmic reticulum lumen, extracellular region, extracellular space, insulin-like growth factor binding protein complex, insulin-like growth factor ternary complex, nucleus	fibronectin binding, insulin-like growth factor binding, insulin-like growth factor I binding, insulin-like growth factor II binding, metal ion binding, protein tyrosine phosphatase activator activity	apoptotic process, cellular protein metabolic process, negative regulation of cell proliferation, negative regulation of protein phosphorylation, negative regulation of signal transduction, negative regulation of smooth muscle cell migration, negative regulation of smooth muscle cell proliferation, osteoblast differentiation, positive regulation of apoptotic process, positive regulation of insuli…	37.8007	15	31653.7	8.53467	-0.535052	1.24132e-05
P32119	PRDX2				6.69211				5.6785				5.38803				6.04764				6.09023	Peroxiredoxin-2	cytoplasm, cytosol, extracellular exosome	antioxidant activity, thioredoxin peroxidase activity	cell redox homeostasis, cellular response to oxidative stress, hydrogen peroxide catabolic process, negative regulation of apoptotic process, regulation of apoptotic process, removal of superoxide radicals, response to oxidative stress	17.6768	3	21878.2	5.52686	-0.199495	1.36159e-05
P24557	TBXAS1					5.72379	6.36981	6.71363	5.6086	6.17338	6.20068	6.75245		6.50503	7.06007	6.94436		6.75559	5.76319	6.95679		Thromboxane-A synthase	endoplasmic reticulum membrane, integral component of membrane	12-hydroxyheptadecatrienoic acid synthase activity, heme binding, iron ion binding, monooxygenase activity, oxidoreductase activity, acting on paired donors, with incorporation or reduction of molecular oxygen, thromboxane-A synthase activity	cyclooxygenase pathway, icosanoid metabolic process	14.4465	8	60479.1	7.33838	-0.0587242	1.44692e-05
P10599	TXN				6.99289	5.77419	6.43439	6.14836	6.22701	6.58702	5.65763	6.32859	5.48743	6.03317	6.77607	6.51663	6.27497	6.52215	6.30148	6.35304	5.72874	Thioredoxin	cytosol, extracellular exosome, nucleus	peptide disulfide oxidoreductase activity, protein disulfide oxidoreductase activity, RNA binding	activation of protein kinase B activity, cell proliferation, cell redox homeostasis, cell-cell signaling, glycerol ether metabolic process, negative regulation of hydrogen peroxide-induced cell death, negative regulation of protein export from nucleus, negative regulation of transcription by RNA polymerase II, oxidation-reduction process, positive regulation of DNA binding, positive regulation of…	32.381	4	11729.7	4.56299	-0.0961905	1.62129e-05
Q13867	BLMH				6.58344		5.99217		5.6459				5.28379				6.05443				5.62516	Bleomycin hydrolase	cytoplasm, cytosol, extracellular exosome, nucleus	aminopeptidase activity, carboxypeptidase activity, cysteine-type endopeptidase activity, cysteine-type peptidase activity, identical protein binding	homocysteine catabolic process, protein polyubiquitination, proteolysis, response to drug, response to toxic substance	20	8	52528	5.80713	-0.382198	1.66659e-05
O00139	KIF2A						4.85651				5.47955	5.87804		5.61643	6.60762	5.75804		6.18585		6.46428		Kinesin-like protein KIF2A	centriolar subdistal appendage, centriole, centrosome, cytoplasm, cytosol, kinesin complex, membrane, microtubule, nuclear body, nucleolus, nucleus, sperm principal piece, spindle pole	ATP binding, ATPase activity, microtubule binding, microtubule motor activity, motor activity	antigen processing and presentation of exogenous peptide antigen via MHC class II, cell differentiation, cell division, microtubule cytoskeleton organization, microtubule depolymerization, microtubule-based movement, mitotic spindle assembly, mitotic spindle organization, nervous system development, regulation of cell migration, retrograde vesicle-mediated transport, Golgi to ER	12.3229	8	79904.6	6.23779	-0.647025	1.71262e-05
P62826	RAN				5.86089	5.44554	5.9103	5.14015	5.53125		5.54426	5.13873	5.13113	5.48307	5.77166	5.63569	5.69888	6.27206	6.67218	6.68686	5.55778	GTP-binding nuclear protein Ran	centriole, cytoplasm, cytosol, extracellular exosome, host cell, male germ cell nucleus, manchette, melanosome, membrane, midbody, nuclear envelope, nuclear pore, nucleolus, nucleoplasm, nucleus, protein-containing complex, recycling endosome, RNA nuclear export complex, sperm flagellum	androgen receptor binding, cadherin binding, chromatin binding, dynein intermediate chain binding, GDP binding, GTP binding, GTPase activity, importin-alpha family protein binding, magnesium ion binding, protein domain specific binding, protein heterodimerization activity, protein-containing complex binding, RNA binding, transcription coactivator activity	actin cytoskeleton organization, androgen receptor signaling pathway, cell division, cellular protein-containing complex localization, cellular response to mineralocorticoid stimulus, DNA metabolic process, GTP metabolic process, hippocampus development, intracellular transport of virus, miRNA metabolic process, mitotic cell cycle, mitotic sister chromatid segregation, mitotic spindle organizatio…	20.8333	5	24407.6	7.24951	-0.265741	1.81226e-05
P08575	PTPRC									6.23733		5.81522	4.81207		6.01507			6.43395	6.65359	6.08169	5.72083	Receptor-type tyrosine-protein phosphatase C	bleb, cell surface, cytoplasmic side of plasma membrane, external side of plasma membrane, extracellular exosome, focal adhesion, integral component of membrane, integral component of plasma membrane, membrane, membrane microdomain, membrane raft, plasma membrane, secretory granule membrane	ankyrin binding, heparan sulfate proteoglycan binding, heparin binding, protein homodimerization activity, protein kinase binding, protein tyrosine phosphatase activity, signaling receptor binding, spectrin binding, transmembrane receptor protein tyrosine phosphatase activity	activation of MAPK activity, B cell differentiation, B cell proliferation, B cell receptor signaling pathway, bone marrow development, calcium-mediated signaling using intracellular calcium source, cell cycle phase transition, cell surface receptor signaling pathway, cellular response to extracellular stimulus, defense response to virus, dephosphorylation, DN2 thymocyte differentiation, hematopoi…	8.5758	7	147394	5.70459	-0.593185	1.96695e-05
P04070	PROC	7.2707	7.45048	7.04659	5.20874								5.36204				5.63596			6.36993	6.00527	Vitamin K-dependent protein C	endoplasmic reticulum, endoplasmic reticulum lumen, extracellular region, extracellular space, Golgi apparatus, Golgi lumen	calcium ion binding, serine-type endopeptidase activity	blood coagulation, cellular protein metabolic process, ER to Golgi vesicle-mediated transport, negative regulation of apoptotic process, negative regulation of blood coagulation, negative regulation of coagulation, negative regulation of inflammatory response, positive regulation of establishment of endothelial barrier, post-translational protein modification, proteolysis	16.4859	9	52037.5	5.80713	-0.349458	2.07558e-05
P04843	RPN1							6.58681	5.74357	6.05043	5.74578	5.95486		6.09968	6.63071	6.54849		6.34284		6.52807		Dolichyl-diphosphooligosaccharide--protein glycosyltransferase subunit 1	cytosol, endoplasmic reticulum, endoplasmic reticulum membrane, integral component of membrane, melanosome, membrane, oligosaccharyltransferase complex, rough endoplasmic reticulum	dolichyl-diphosphooligosaccharide-protein glycotransferase activity, RNA binding	cellular protein modification process, protein N-linked glycosylation via asparagine	11.3674	5	68526.8	5.9165	-0.208237	2.24392e-05
P48681	NES	6.68737	6.68369	6.71528	6.25551	5.99633	6.52896		6.3352	6.34053	5.78676	6.18161	6.31341		6.90786	6.68945	6.56354	6.3141	6.64352	7.07908	6.41993	Nestin	cytoplasm, intermediate filament, intermediate filament cytoskeleton	intermediate filament binding, structural molecule activity	brain development, central nervous system development, embryonic camera-type eye development, G2/M transition of mitotic cell cycle, negative regulation of catalytic activity, negative regulation of protein binding, positive regulation of intermediate filament depolymerization, positive regulation of neural precursor cell proliferation, stem cell proliferation	12.5231	16	177332	4.11182	-0.904627	2.30043e-05
P17301	ITGA2						6.56818	6.64767	5.65349	6.47257	6.19622	6.40173	4.27516	6.3782	6.45681	6.91469		6.63849		6.69713		Integrin alpha-2	axon terminus, basal part of cell, cell surface, external side of plasma membrane, focal adhesion, integrin alpha2-beta1 complex, integrin complex, nucleus, perinuclear region of cytoplasm, plasma membrane	amyloid-beta binding, collagen binding, collagen binding involved in cell-matrix adhesion, collagen receptor activity, heparan sulfate proteoglycan binding, integrin binding, laminin binding, metal ion binding, protein heterodimerization activity, protein-containing complex binding, virus receptor activity	animal organ morphogenesis, blood coagulation, cell adhesion, cell adhesion mediated by integrin, cell proliferation, cell-matrix adhesion, cell-substrate adhesion, cellular response to estradiol stimulus, cellular response to mechanical stimulus, collagen-activated signaling pathway, detection of mechanical stimulus involved in sensory perception of pain, establishment of protein localization, e…	5.58848	6	129214	4.93213	-0.0999153	2.54122e-05
Q9NQC3	RTN4			5.93047	5.50219		6.19382		5.94611	6.34881	6.22905	6.25896	5.32966	6.1763	6.26773	6.6327	5.4887	6.75916		6.99724	5.36997	Reticulon-4	cell projection, endoplasmic reticulum, endoplasmic reticulum membrane, endoplasmic reticulum tubular network, endoplasmic reticulum tubular network membrane, integral component of endoplasmic reticulum membrane, intracellular, neuronal cell body, nuclear envelope, plasma membrane, postsynaptic density	cadherin binding, RNA binding, ubiquitin protein ligase binding	apoptotic process, axonal fasciculation, blastocyst formation, cardiac epithelial to mesenchymal transition, cerebral cortex radial glia guided migration, endoplasmic reticulum tubular network formation, endoplasmic reticulum tubular network membrane organization, endoplasmic reticulum tubular network organization, negative regulation of axon extension, negative regulation of axonogenesis, negati…	3.4396	3	129851	4.1665	-0.414262	2.73044e-05
P62258	YWHAE			5.58573	5.42019	5.24768	6.12901	5.57536	5.79685	6.3393	5.09496	5.69314	5.62841	5.96879	6.22847	6.45292	5.80009	6.39795	6.01763	6.51546		14-3-3 protein epsilon	central region of growth cone, cytoplasm, cytosol, extracellular exosome, focal adhesion, glutamatergic synapse, kinesin complex, melanosome, membrane, mitochondrion, nucleus	cadherin binding, calcium channel regulator activity, enzyme binding, histone deacetylase binding, identical protein binding, ion channel binding, MHC class II protein complex binding, phosphoprotein binding, phosphoserine residue binding, potassium channel regulator activity, protein domain specific binding, protein heterodimerization activity, Rab guanyl-nucleotide exchange factor activity, RNA…	cellular response to heat, ciliary basal body-plasma membrane docking, G2/M transition of mitotic cell cycle, hippo signaling, intracellular signal transduction, MAPK cascade, membrane organization, membrane repolarization during cardiac muscle cell action potential, negative regulation of calcium ion export across plasma membrane, negative regulation of calcium ion transmembrane transporter acti…	29.8039	6	29155.4	4.37158	-0.54	2.93467e-05
P16403	HIST1H1C				6.63087	6.08304			6.24686	6.57826	6.23487	6.21947	6.00967	6.18416	6.41573	6.37985	6.25326	6.82105	6.96449	6.80804	6.51098	Histone H1.2	nuclear euchromatin, nucleosome, nucleus, transcriptionally active chromatin	chromatin DNA binding, double-stranded DNA binding, nucleosomal DNA binding, RNA binding	chromosome condensation, histone H3-K27 trimethylation, histone H3-K4 trimethylation, negative regulation of chromatin silencing, negative regulation of DNA recombination, negative regulation of transcription by RNA polymerase II, nucleosome assembly, nucleosome positioning, regulation of transcription, DNA-templated	23.9437	6	21351.7	11.4604	-0.684507	3.00385e-05
Q76LX8	ADAMTS13	6.30362	6.35888	5.88129																		A disintegrin and metalloproteinase with thrombospondin motifs 13	cell surface, endoplasmic reticulum lumen, extracellular matrix, extracellular space	calcium ion binding, integrin binding, metalloendopeptidase activity, metallopeptidase activity, zinc ion binding	cell-matrix adhesion, cellular response to interferon-gamma, cellular response to interleukin-4, cellular response to lipopolysaccharide, cellular response to tumor necrosis factor, glycoprotein metabolic process, integrin-mediated signaling pathway, peptide catabolic process, platelet activation, protein processing, proteolysis, response to amine, response to potassium ion, response to toxic sub…	7.56833	8	153505	6.75049	-0.269446	3.14827e-05
P80108	GPLD1	7.164	7.06392	6.8085	5.41113				5.64871				5.70797				6.05351	6.48318	6.54061	6.74453	6.03698	Phosphatidylinositol-glycan-specific phospholipase D	cytoplasm, extracellular exosome, extracellular matrix, extracellular region, extracellular space, intracellular, intracellular membrane-bounded organelle, lysosomal membrane	glycosylphosphatidylinositol phospholipase D activity, phospholipase D activity, sodium channel regulator activity	C-terminal protein lipidation, cell migration involved in sprouting angiogenesis, cellular response to calcium ion, cellular response to cholesterol, cellular response to drug, cellular response to insulin stimulus, cellular response to pH, cellular response to triglyceride, chondrocyte differentiation, complement receptor mediated signaling pathway, GPI anchor release, hematopoietic stem cell mi…	15.8333	11	92278	5.88232	-0.130476	3.29925e-05
Q14315	FLNC				5.48474				5.66061		5.4245		5.64185				5.63697				5.72415	Filamin-C	costamere, cytoplasm, cytoskeleton, cytosol, focal adhesion, plasma membrane, sarcolemma, sarcoplasm, Z disc	actin filament binding, ankyrin binding, cytoskeletal protein binding, identical protein binding	cell junction assembly, muscle fiber development	2.20183	5	290841	5.54053	-0.320294	3.38485e-05
Q9Y6C2	EMILIN1					5.25937	5.95575	5.61333		5.92862	5.31266	5.96609		5.98215	6.26786	6.38134		6.34628		6.5329		EMILIN-1	collagen trimer, collagen-containing extracellular matrix, EMILIN complex, extracellular exosome, extracellular matrix, extracellular region, extracellular space, integrin alpha4-beta1 complex	extracellular matrix constituent conferring elasticity, identical protein binding, integrin binding involved in cell-matrix adhesion	aortic valve morphogenesis, cell adhesion, cell migration, cell-matrix adhesion, elastic fiber assembly, negative regulation of angiogenesis, negative regulation of cell activation, negative regulation of collagen biosynthetic process, negative regulation of collagen fibril organization, negative regulation of ERK1 and ERK2 cascade, negative regulation of gene expression, negative regulation of m…	9.05512	6	106629	4.89111	-0.388484	3.47128e-05
O00429	DNM1L						6.44444	6.269	5.4378	6.42295	5.69243	6.73349		6.54807	6.95624	6.80376		6.73586		6.67254		Dynamin-1-like protein	brush border, cell junction, clathrin-coated pit, cytoplasm, cytosol, endoplasmic reticulum, endoplasmic reticulum membrane, Golgi apparatus, Golgi membrane, intracellular membrane-bounded organelle, membrane, microtubule, mitochondrial membrane, mitochondrial outer membrane, mitochondrion, perinuclear region of cytoplasm, peroxisome, postsynapse, presynaptic endocytic zone membrane, protein-cont…	BH2 domain binding, clathrin binding, GTP binding, GTP-dependent protein binding, GTPase activator activity, GTPase activity, identical protein binding, lipid binding, microtubule binding, protein homodimerization activity, protein-containing complex binding, Rab GTPase binding, ubiquitin protein ligase binding	apoptotic mitochondrial changes, cellular response to oxygen-glucose deprivation, cellular response to thapsigargin, dynamin family protein polymerization involved in mitochondrial fission, execution phase of apoptosis, heart contraction, intracellular distribution of mitochondria, membrane fusion, mitochondrial fission, mitochondrial fragmentation involved in apoptotic process, mitochondrial mem…	6.11413	4	81826.1	6.354	-0.258967	3.55742e-05
P05109	S100A8		6.06344		7.14786	5.97106	6.78632	6.30412	6.64013	7.12834	6.28013	6.758	6.50374	6.67586	7.10114	7.09921	6.81594	7.42687	7.66693	7.45137	6.79709	Protein S100-A8	collagen-containing extracellular matrix, cytoskeleton, cytosol, extracellular exosome, extracellular region, extracellular space, intermediate filament cytoskeleton, nucleus, plasma membrane, secretory granule lumen	arachidonic acid binding, calcium ion binding, microtubule binding, RAGE receptor binding, Toll-like receptor 4 binding, zinc ion binding	activation of cysteine-type endopeptidase activity involved in apoptotic process, acute inflammatory response, antimicrobial humoral response, apoptotic process, astrocyte development, autophagy, chemokine production, chronic inflammatory response, cytokine production, defense response to bacterium, defense response to fungus, inflammatory response, innate immune response, leukocyte migration inv…	53.7634	8	10827.6	6.61377	-0.396774	3.6506e-05
P07900	HSP90AA1	6.14279	5.94925	6.1382	5.7054				5.54446		5.88164		5.10555	5.82737	6.30096	6.33556	5.47726	6.27915			5.68656	Heat shock protein HSP 90-alpha	axonal growth cone, cell surface, cytoplasm, cytosol, dendritic growth cone, endocytic vesicle lumen, extracellular exosome, extracellular region, ficolin-1-rich granule lumen, lysosomal lumen, melanosome, membrane, myelin sheath, neuronal cell body, nucleoplasm, nucleus, perinuclear region of cytoplasm, plasma membrane, protein-containing complex, secretory granule lumen	ATP binding, ATPase activity, ATPase activity, coupled, disordered domain specific binding, DNA polymerase binding, GTPase binding, histone deacetylase binding, identical protein binding, MHC class II protein complex binding, nitric-oxide synthase regulator activity, nucleotide binding, protein homodimerization activity, protein tyrosine kinase activity, protein tyrosine kinase binding, RNA bindi…	axon extension, cellular response to heat, central nervous system neuron axonogenesis, chaperone-mediated autophagy, chaperone-mediated protein complex assembly, ciliary basal body-plasma membrane docking, cofactor metabolic process, cytokine-mediated signaling pathway, ERBB2 signaling pathway, establishment of cell polarity, Fc-gamma receptor signaling pathway involved in phagocytosis, G2/M tran…	11.2022	7	84606.7	4.70654	-0.750273	3.74638e-05
P24821	TNC	6.48109	6.27133	6.29915																		Tenascin	basement membrane, collagen-containing extracellular matrix, endoplasmic reticulum lumen, extracellular region, extracellular space, focal adhesion, interstitial matrix, membrane, perisynaptic extracellular matrix	extracellular matrix structural constituent, syndecan binding	bud outgrowth involved in lung branching, cell adhesion, cellular protein metabolic process, cellular response to prostaglandin D stimulus, cellular response to retinoic acid, cellular response to vitamin D, extracellular matrix organization, mesenchymal-epithelial cell signaling involved in prostate gland development, negative regulation of cell adhesion, neuromuscular junction development, odon…	6.99682	10	240700	4.53564	-0.37015	3.84897e-05
Q9GZZ8	LACRT				7.15993				6.79788				6.27835		6.72447		7.11853	6.42779			6.68833	Extracellular glycoprotein lacritin	extracellular region, extracellular space, secretory granule	collagen binding, fibronectin binding, growth factor activity, laminin-1 binding, protein N-terminus binding	calcineurin-NFAT signaling cascade, calcium-mediated signaling, defense response to bacterium, epithelial structure maintenance, negative regulation of apoptotic process, negative regulation of lipopolysaccharide-mediated signaling pathway, positive regulation of calcineurin-NFAT signaling cascade, positive regulation of calcium-mediated signaling, positive regulation of cell proliferation, posit…	22.4638	4	14237.3	5.25342	-0.246377	4.17282e-05
Q96P63	SERPINB12				6.48741								5.47021		6.84437		6.34582					Serpin B12	cytoplasm, extracellular space, ficolin-1-rich granule membrane, plasma membrane	enzyme binding, serine-type endopeptidase inhibitor activity	hematopoietic progenitor cell differentiation, negative regulation of endopeptidase activity, negative regulation of protein catabolic process, neutrophil degranulation	14.0741	5	46247.1	5.17822	-0.34963	4.28862e-05
P0DJI9	SAA2	6.18321	6.28178	5.63394																		Serum amyloid A-2 protein	extracellular exosome, extracellular space, high-density lipoprotein particle	chemoattractant activity	acute-phase response, cell chemotaxis	27.8689	3	13518.6	9.53955	-0.547541	4.40452e-05
O75223	GGCT				6.58396								5.14234				5.4662					Gamma-glutamylcyclotransferase	cytosol, extracellular exosome	gamma-glutamylcyclotransferase activity, protein homodimerization activity	glutathione biosynthetic process, release of cytochrome c from mitochondria	34.5745	7	20994.3	4.84326	-0.496277	4.52773e-05
P61158	ACTR3						5.56517	5.68272	5.6554	6.27848	4.57402	6.1821		5.68002	5.9795	6.53734		5.8419		5.98274		Actin-related protein 3	actin cytoskeleton, Arp2/3 protein complex, brush border, cell-cell junction, cytoplasm, cytosol, extracellular exosome, focal adhesion, lamellipodium, membrane, nucleus, site of double-strand break	actin binding, ATP binding, structural constituent of cytoskeleton	actin polymerization-dependent cell motility, Arp2/3 complex-mediated actin nucleation, asymmetric cell division, cellular response to interferon-gamma, cilium assembly, ephrin receptor signaling pathway, establishment or maintenance of cell polarity, Fc-gamma receptor signaling pathway involved in phagocytosis, meiotic chromosome movement towards spindle pole, meiotic cytokinesis, membrane organ…	9.56938	3	47341	5.48584	-0.266268	4.79201e-05
P55072	VCP				5.79081	5.8851	6.44838	6.26375	5.77624	6.45388	6.19491	6.35907	4.88148	6.48333	6.85495	6.8482	5.60644	6.69071		6.7306	5.74693	Transitional endoplasmic reticulum ATPase	ATPase complex, azurophil granule lumen, cytoplasm, cytoplasmic stress granule, cytosol, Derlin-1 retrotranslocation complex, endoplasmic reticulum, endoplasmic reticulum membrane, extracellular exosome, extracellular region, ficolin-1-rich granule lumen, glutamatergic synapse, intracellular membrane-bounded organelle, lipid droplet, myelin sheath, nucleoplasm, nucleus, perinuclear region of cyto…	ADP binding, ATP binding, ATPase activity, BAT3 complex binding, deubiquitinase activator activity, identical protein binding, K48-linked polyubiquitin modification-dependent protein binding, lipid binding, MHC class I protein binding, polyubiquitin modification-dependent protein binding, protein domain specific binding, protein phosphatase binding, RNA binding, ubiquitin protein ligase binding, …	activation of cysteine-type endopeptidase activity involved in apoptotic process, aggresome assembly, ATP metabolic process, autophagosome maturation, autophagy, cellular response to arsenite ion, cellular response to DNA damage stimulus, cellular response to heat, DNA repair, double-strand break repair, endoplasmic reticulum stress-induced pre-emptive quality control, endoplasmic reticulum unfol…	10.9181	7	89265.7	4.89795	-0.347643	4.92998e-05
P26447	S100A4				5.81243		6.78377	6.7074	5.335	6.77021	6.3496	6.76796	5.78995			7.18355	5.63387	6.65746	6.63211	6.61039	5.79402	Protein S100-A4	extracellular exosome, extracellular region, extracellular space, neuron projection, nucleus, perinuclear region of cytoplasm	actin binding, calcium ion binding, calcium-dependent protein binding, identical protein binding, RAGE receptor binding, RNA binding, transition metal ion binding	epithelial to mesenchymal transition, positive regulation of I-kappaB kinase/NF-kappaB signaling	24.7525	4	11720.7	5.73877	-0.564356	5.2237e-05
P16401	HIST1H1B				5.9646				5.87864				5.57431				6.01091		6.52687		6.03011	Histone H1.5	nuclear chromatin, nuclear heterochromatin, nucleosome, nucleus	chromatin DNA binding, double-stranded DNA binding, histone deacetylase binding, nucleosomal DNA binding, RNA binding	chromatin organization, chromosome condensation, establishment of protein localization to chromatin, negative regulation of chromatin silencing, negative regulation of DNA recombination, negative regulation of transcription by RNA polymerase II, nucleosome assembly, nucleosome positioning, positive regulation of cell growth, positive regulation of histone H3-K9 methylation, protein stabilization,…	17.2566	3	22566.5	11.4331	-0.742035	5.67668e-05
P04632	CAPNS1		6.16024		5.72437	5.64371	6.57321	6.37884	5.42002	6.78824	6.60387	6.88978		6.43525	7.02156	7.13465		6.72485	6.44507	6.6579		Calpain small subunit 1	cytosol, extracellular exosome, membrane, plasma membrane	calcium ion binding, calcium-dependent cysteine-type endopeptidase activity, endopeptidase activity	cornification, positive regulation of cell proliferation, regulation of macroautophagy	23.8806	6	28297.7	4.80908	-0.237687	6.18404e-05
P03973	SLPI				5.54701				5.56401				4.92076				5.28459		5.78393		5.73892	Antileukoproteinase	collagen-containing extracellular matrix, extracellular exosome, extracellular region, extracellular space, specific granule lumen	DNA binding, endopeptidase inhibitor activity, enzyme binding, mRNA binding, serine-type endopeptidase inhibitor activity	antibacterial humoral response, immune response, innate immune response, modification of morphology or physiology of other organism, negative regulation of protein binding, negative regulation of viral genome replication, neutrophil degranulation, response to lipopolysaccharide	20.4545	3	14315.9	8.60986	-0.305303	6.35813e-05
P09668	CTSH				6.42561												5.64361					Pro-cathepsin H	alveolar lamellar body, cytoplasmic ribonucleoprotein granule, cytosol, extracellular exosome, extracellular region, extracellular space, ficolin-1-rich granule lumen, intracellular membrane-bounded organelle, lysosome, multivesicular body lumen, secretory granule lumen, tertiary granule lumen	aminopeptidase activity, cysteine-type endopeptidase activator activity involved in apoptotic process, cysteine-type endopeptidase activity, cysteine-type peptidase activity, endopeptidase activity, HLA-A specific activating MHC class I receptor activity, peptidase activity, serine-type endopeptidase activity, thyroid hormone binding	adaptive immune response, antigen processing and presentation, bradykinin catabolic process, cellular protein metabolic process, cellular response to thyroid hormone stimulus, dichotomous subdivision of terminal units involved in lung branching, ERK1 and ERK2 cascade, immune response-regulating signaling pathway, membrane protein proteolysis, metanephros development, negative regulation of apopto…	10.4478	3	37369	7.87158	-0.277612	6.53196e-05
Q9Y623	MYH4											6.58627										Myosin-4	muscle myosin complex, myofibril, myosin filament, sarcomere	actin filament binding, ATP binding, ATPase activity, calmodulin binding, double-stranded RNA binding, microfilament motor activity	actin filament-based movement, ATP metabolic process, muscle contraction, muscle filament sliding	2.88809	5	222932	5.51318	-0.779268	7.7169e-05
P08238	HSP90AB1		5.25034	5.60657	5.95286				5.74288		4.88324		5.66088			5.37606	5.94263	5.68926			5.64645	Heat shock protein HSP 90-beta	apical plasma membrane, aryl hydrocarbon receptor complex, axonal growth cone, basolateral plasma membrane, brush border membrane, cell surface, cytoplasm, cytosol, dendritic growth cone, extracellular exosome, extracellular region, ficolin-1-rich granule lumen, HSP90-CDC37 chaperone complex, inclusion body, lysosomal membrane, melanosome, membrane, mitochondrion, neuronal cell body, nucleoplasm,…	ATP binding, ATP-dependent protein binding, ATPase activity, coupled, cadherin binding, CTP binding, dATP binding, disordered domain specific binding, DNA polymerase binding, double-stranded RNA binding, GTP binding, heat shock protein binding, histone deacetylase binding, histone methyltransferase binding, identical protein binding, ion channel binding, kinase binding, MHC class II protein compl…	axon extension, cellular response to drug, cellular response to interleukin-4, cellular response to organic cyclic compound, central nervous system neuron axonogenesis, chaperone-mediated protein complex assembly, establishment of cell polarity, Fc-gamma receptor signaling pathway involved in phagocytosis, negative regulation of cell cycle arrest, negative regulation of complement-dependent cytot…	11.326	7	83212.1	4.73389	-0.678453	7.9265e-05
Q09666	AHNAK				5.84206				5.94286		5.61958		5.81011				5.96665				5.95748	Neuroblast differentiation-associated protein AHNAK	actin cytoskeleton, cell-cell contact zone, costamere, cytoplasm, cytosol, extracellular exosome, focal adhesion, lysosomal membrane, membrane, nucleus, plasma membrane, sarcolemma, T-tubule, vesicle	cadherin binding, RNA binding, S100 protein binding, structural molecule activity conferring elasticity	protein complex oligomerization, regulation of RNA splicing, regulation of voltage-gated calcium channel activity	6.31579	6	628699	5.67725	-0.498846	8.35277e-05
P13639	EEF2				6.19231				5.50183		4.65068		5.51687				5.96271		5.94842		6.01534	Elongation factor 2	aggresome, cytoplasm, cytosol, extracellular exosome, extracellular region, ficolin-1-rich granule lumen, membrane, membrane raft, nucleus, plasma membrane, polysomal ribosome, ribonucleoprotein complex, secretory granule lumen, synapse	5S rRNA binding, actin filament binding, cadherin binding, GTP binding, GTPase activity, p53 binding, protein kinase binding, ribosome binding, RNA binding, translation elongation factor activity	aging, cellular response to brain-derived neurotrophic factor stimulus, glial cell proliferation, hematopoietic progenitor cell differentiation, neutrophil degranulation, positive regulation of cytoplasmic translation, positive regulation of translation, response to endoplasmic reticulum stress, response to estradiol, response to ethanol, response to folic acid, response to hydrogen peroxide, res…	7.69231	6	95276.9	6.38135	-0.209441	8.57041e-05
P40926	MDH2								5.86032				5.41925				5.28217			6.18205		Malate dehydrogenase, mitochondrial	extracellular exosome, membrane, mitochondrial matrix, mitochondrion, myelin sheath, nucleus	L-malate dehydrogenase activity, malate dehydrogenase (NADP+) activity, protein self-association, RNA binding	aerobic respiration, gluconeogenesis, internal protein amino acid acetylation, malate metabolic process, NADH metabolic process, oxaloacetate metabolic process, tricarboxylic acid cycle	17.1598	4	35480.7	8.73975	0.143491	0.00011679
P59665	DEFA1	5.97341	5.98764	6.17201	5.93065	5.54753		5.68803	5.57539	6.34045	4.95882	5.63014	5.30396	6.27306	6.59956	6.57978	5.58922	6.87322	6.80159	7.03159	6.15642	Neutrophil defensin 1	azurophil granule lumen, collagen-containing extracellular matrix, extracellular exosome, extracellular region, extracellular space, Golgi lumen		antibacterial humoral response, antimicrobial humoral immune response mediated by antimicrobial peptide, antimicrobial humoral response, cellular response to lipopolysaccharide, chemotaxis, defense response to fungus, defense response to Gram-negative bacterium, defense response to Gram-positive bacterium, defense response to protozoan, defense response to virus, disruption by host of symbiont ce…	20.2128	4	10194.2	6.6958	0.285106	0.000128045
O75390	CS						6.24027	6.41149	5.84348	6.22208	5.84785	6.30496	5.19639	6.34031	6.80876	6.51352		6.46897		6.54294	5.35589	Citrate synthase, mitochondrial	extracellular exosome, mitochondrial matrix, mitochondrion, nucleus	citrate (Si)-synthase activity, RNA binding	carbohydrate metabolic process, tricarboxylic acid cycle	15.0215	6	51679.5	8.38428	-0.164592	0.000134241
O14672	ADAM10					4.93209			5.20903					5.91428				5.73808		6.40418		Disintegrin and metalloproteinase domain-containing protein 10	cell surface, cytoplasm, dendritic spine, endoplasmic reticulum lumen, extracellular exosome, focal adhesion, glutamatergic synapse, Golgi apparatus, Golgi membrane, Golgi-associated vesicle, integral component of membrane, membrane, neuronal cell body, nucleus, perinuclear endoplasmic reticulum, plasma membrane, postsynaptic density, postsynaptic membrane, specific granule membrane, synaptic ves…	endopeptidase activity, integrin binding, metal ion binding, metalloendopeptidase activity, metallopeptidase activity, protein homodimerization activity, protein kinase binding, SH3 domain binding, signaling receptor binding	amyloid-beta formation, cell-cell signaling, cellular protein metabolic process, constitutive protein ectodomain proteolysis, extracellular matrix disassembly, in utero embryonic development, integrin-mediated signaling pathway, membrane protein ectodomain proteolysis, monocyte activation, negative regulation of cell adhesion, neutrophil degranulation, Notch receptor processing, ligand-dependent,…	7.8877	3	84087.7	7.46826	-0.59893	0.000137516
P00338	LDHA	7.21804	7.16258	6.9202	6.24345	6.2534			6.25923	6.54014	6.38888	6.26381	6.25576	6.53636	6.47202	6.80229	6.34161	6.94708	6.98177	6.95854	6.62487	L-lactate dehydrogenase A chain	cytosol, extracellular exosome, membrane, nucleus	cadherin binding, identical protein binding, kinase binding, L-lactate dehydrogenase activity, NAD binding	glycolytic process, lactate metabolic process, NAD metabolic process, positive regulation of apoptotic process, post-embryonic animal organ development, pyruvate metabolic process, response to cAMP, response to estrogen, response to glucose, response to hydrogen peroxide, response to hypoxia, response to nutrient, substantia nigra development	18.0723	7	36665.4	8.26123	-0.0063253	0.000148121
P07359	GP1BA	5.06851	4.72343	4.5962		6.2314	6.4665	6.6943	5.90882	6.74653	6.51193	7.10269	4.76632	6.69165	7.11283	7.42655		6.95892	6.05476	7.11722		Platelet glycoprotein Ib alpha chain	anchored component of external side of plasma membrane, cell surface, extracellular exosome, extracellular matrix, extracellular space, integral component of plasma membrane, membrane, plasma membrane	thrombin-activated receptor activity	blood coagulation, blood coagulation, intrinsic pathway, cell adhesion, cell morphogenesis, cell surface receptor signaling pathway, fibrinolysis, platelet activation, platelet aggregation, regulation of blood coagulation, regulation of megakaryocyte differentiation	9.35583	8	71495.2	5.82764	-0.19816	0.000159635
P09493	TPM1					5.57869	6.24174		5.39884	5.97335		6.25312		5.17445	5.85318					5.88418		Tropomyosin alpha-1 chain	actin cytoskeleton, actin filament, bleb, cytoskeleton, cytosol, muscle thin filament tropomyosin, ruffle membrane, sarcomere, stress fiber	actin binding, actin filament binding, cytoskeletal protein binding, identical protein binding, protein heterodimerization activity, protein homodimerization activity, structural constituent of cytoskeleton, structural constituent of muscle	actin filament organization, cardiac muscle contraction, cellular response to reactive oxygen species, cytoskeleton organization, in utero embryonic development, muscle contraction, muscle filament sliding, negative regulation of cell migration, negative regulation of vascular associated smooth muscle cell migration, negative regulation of vascular smooth muscle cell proliferation, positive regul…	23.9437	6	32688.7	4.44678	-1.04401	0.000177499
Q01518	CAP1						5.73336		5.55694	6.28626								6.16423	6.40732	6.40873		Adenylyl cyclase-associated protein 1	azurophil granule lumen, cortical actin cytoskeleton, extracellular exosome, extracellular region, focal adhesion, plasma membrane	actin binding, adenylate cyclase binding	actin polymerization or depolymerization, activation of adenylate cyclase activity, ameboidal-type cell migration, cell morphogenesis, establishment or maintenance of cell polarity, neutrophil degranulation, receptor-mediated endocytosis, regulation of adenylate cyclase activity, signal transduction	13.0526	6	51868.7	7.93994	-0.352211	0.000192619
P61978	HNRNPK				5.57865				5.61436				5.28561				5.81767				5.5121	Heterogeneous nuclear ribonucleoprotein K	catalytic step 2 spliceosome, cell projection, cytoplasm, cytoplasmic stress granule, extracellular exosome, focal adhesion, membrane, nuclear chromatin, nucleoplasm, nucleus, podosome	cadherin binding, identical protein binding, protein domain specific binding, proximal promoter DNA-binding transcription activator activity, RNA polymerase II-specific, RNA binding, RNA polymerase II proximal promoter sequence-specific DNA binding, single-stranded DNA binding	mRNA splicing, via spliceosome, negative regulation of apoptotic process, negative regulation of mRNA splicing, via spliceosome, positive regulation of low-density lipoprotein particle receptor biosynthetic process, positive regulation of receptor-mediated endocytosis, positive regulation of transcription by RNA polymerase II, regulation of intrinsic apoptotic signaling pathway in response to DNA…	6.69546	3	50944.4	5.17139	-0.704752	0.000214664
Q13423	NNT						6.40669	5.96871	5.49259	6.13722				5.81099	6.13863	6.47112		6.34905		6.50918		NAD(P) transhydrogenase, mitochondrial	integral component of membrane, membrane, mitochondrial inner membrane, mitochondrial respiratory chain, mitochondrion	NAD binding, NAD(P)+ transhydrogenase (AB-specific) activity, NAD(P)+ transhydrogenase (B-specific) activity, NAD(P)+ transhydrogenase activity, NADP binding	cell redox homeostasis, cellular oxidant detoxification, NADPH regeneration, negative regulation of apoptotic process, negative regulation of protein phosphorylation, oxidation-reduction process, oxygen homeostasis, positive regulation of hydrogen peroxide catabolic process, positive regulation of mitochondrial membrane potential, proton transmembrane transport, reactive oxygen species metabolic …	4.60405	4	113823	7.93994	0.299079	0.000220305
Q9BS26	ERP44						6.05803			5.91287		5.75486			5.87435	6.26679						Endoplasmic reticulum resident protein 44	cell surface, endoplasmic reticulum lumen, endoplasmic reticulum membrane, endoplasmic reticulum-Golgi intermediate compartment, extracellular exosome, extracellular region, specific granule lumen	protein disulfide isomerase activity	cell redox homeostasis, glycoprotein metabolic process, neutrophil degranulation, protein folding, response to endoplasmic reticulum stress, response to unfolded protein	10.3448	4	46941.4	4.85693	-0.400985	0.000232218
P15531	NME1			5.84582	6.16782	5.09606	6.42628	6.10768	6.09534	6.22285	6.18092	6.17262	5.65595	6.24909	6.71568	6.69097	6.03009	6.63108	6.12465	6.70514	6.00377	Nucleoside diphosphate kinase A	centrosome, cytoplasm, cytosol, extracellular exosome, intermediate filament, membrane, mitochondrial outer membrane, myelin sheath, nucleus, perinuclear region of cytoplasm, ruffle membrane	ATP binding, deoxyribonuclease activity, enzyme binding, gamma-tubulin binding, GTP binding, identical protein binding, intermediate filament binding, magnesium ion binding, nucleoside diphosphate kinase activity, ribosomal small subunit binding, RNA binding, RNA polymerase II regulatory region sequence-specific DNA binding, single-stranded DNA binding	cellular response to drug, cellular response to fatty acid, cellular response to glucose stimulus, CTP biosynthetic process, endocytosis, GTP biosynthetic process, hippocampus development, lactation, negative regulation of cell proliferation, negative regulation of gene expression, negative regulation of myeloid leukocyte differentiation, nucleobase-containing small molecule interconversion, posi…	28.2895	4	17137.7	5.75244	-0.194079	0.00023892
P09486	SPARC		6.46238	5.99279																		SPARC	basement membrane, cell surface, collagen-containing extracellular matrix, cytoplasm, endocytic vesicle lumen, extracellular region, extracellular space, glutamatergic synapse, nuclear matrix, platelet alpha granule, platelet alpha granule lumen, platelet alpha granule membrane	calcium ion binding, collagen binding, extracellular matrix binding, extracellular matrix structural constituent	bone development, cellular response to growth factor stimulus, extracellular matrix organization, heart development, inner ear development, lung development, negative regulation of angiogenesis, negative regulation of endothelial cell proliferation, ossification, pigmentation, platelet degranulation, positive regulation of endothelial cell migration, receptor-mediated endocytosis, regulation of c…	9.24092	3	34609.7	4.48779	-0.470957	0.000326645
P08133	ANXA6				5.85453	5.52491			5.89972		5.78671		5.83525				5.99055	5.60229	6.21824	5.73879	6.12684	Annexin A6	collagen-containing extracellular matrix, extracellular exosome, focal adhesion, late endosome membrane, lysosomal membrane, melanosome, membrane, mitochondrion, perinuclear region of cytoplasm	actin filament binding, calcium channel activity, calcium ion binding, calcium-dependent phospholipid binding, calcium-dependent protein binding, cholesterol binding, chondroitin sulfate binding, enzyme binding, GTP binding, heparin binding, ligand-gated ion channel activity, lipid binding, phosphatidylserine binding, protein homodimerization activity, protein-containing complex binding, signalin…	apoptotic signaling pathway, biomineral tissue development, calcium ion import, growth plate cartilage chondrocyte differentiation, ion transmembrane transport, mitochondrial calcium ion homeostasis, negative regulation of sequestering of calcium ion, neural crest cell migration, protein homooligomerization, regulation of muscle contraction	17.0877	10	75825.6	5.21924	-0.45156	0.000393841
P20160	AZU1													5.57613	6.47994			6.28952	6.58619	6.52438		Azurocidin	azurophil granule, azurophil granule lumen, azurophil granule membrane, extracellular exosome, extracellular region, extracellular space, extrinsic component of membrane	heparan sulfate proteoglycan binding, heparin binding, peptidase activity, serine-type endopeptidase activity, toxic substance binding	antimicrobial humoral response, calcium-mediated signaling using intracellular calcium source, cell chemotaxis, cellular extravasation, defense response to Gram-negative bacterium, defense response to virus, glial cell migration, induction of positive chemotaxis, inflammatory response, macrophage chemotaxis, microglial cell activation, monocyte activation, negative regulation of apoptotic process…	4.38247	1	26868.7	9.68311	-0.124303	0.000405133
Q13835	PKP1				5.82351												5.5365					Plakophilin-1	cell-cell adherens junction, cell-cell junction, cornified envelope, cytoplasm, desmosome, ficolin-1-rich granule membrane, intermediate filament, intracellular membrane-bounded organelle, messenger ribonucleoprotein complex, nucleoplasm, nucleus, plasma membrane	cadherin binding, intermediate filament binding, lamin binding, structural constituent of epidermis	cell adhesion, cell-cell adhesion, cell-cell junction assembly, cornification, intermediate filament bundle assembly, keratinization, negative regulation of mRNA catabolic process, neutrophil degranulation, positive regulation of gene expression, signal transduction	8.83534	5	82807.8	9.27979	-0.563454	0.000441877
P14314	PRKCSH									5.89971	5.51217	6.04579		5.73505		6.38805		6.1563		6.46263		Glucosidase 2 subunit beta	endoplasmic reticulum, endoplasmic reticulum lumen, glucosidase II complex, intracellular, intracellular membrane-bounded organelle	calcium ion binding, ion channel binding, phosphoprotein binding, protein kinase C binding	cellular protein metabolic process, intracellular signal transduction, N-glycan processing, post-translational protein modification	7.76515	4	59387.8	4.0708	-0.910417	0.000455578
Q14008	CKAP5																	5.88043	6.38213	6.16184		Cytoskeleton-associated protein 5	centrosome, condensed chromosome kinetochore, cytosol, kinetochore, membrane, nucleolus, plasma membrane, protein-containing complex, spindle pole	cadherin binding, microtubule plus-end binding	cell division, centrosome cycle, centrosome duplication, ciliary basal body-plasma membrane docking, establishment or maintenance of microtubule cytoskeleton polarity, G2/M transition of mitotic cell cycle, microtubule depolymerization, microtubule polymerization, regulation of G2/M transition of mitotic cell cycle, RNA transport, spindle organization	1.32874	3	225352	7.55029	-0.36314	0.000598097
P07858	CTSB				6.41283				5.31148								5.49311					Cathepsin B	collagen-containing extracellular matrix, endolysosome lumen, extracellular exosome, extracellular region, extracellular space, ficolin-1-rich granule lumen, intracellular, intracellular membrane-bounded organelle, lysosome, melanosome, nucleolus, perinuclear region of cytoplasm	collagen binding, cysteine-type endopeptidase activity, cysteine-type peptidase activity, peptidase activity, proteoglycan binding, serine-type endopeptidase activity	cellular response to thyroid hormone stimulus, collagen catabolic process, decidualization, epithelial cell differentiation, neutrophil degranulation, proteolysis, proteolysis involved in cellular protein catabolic process, regulation of apoptotic process, regulation of catalytic activity, viral entry into host cell	17.1091	6	37796.8	5.84131	-0.394395	0.000758409
P08758	ANXA5				6.06309	5.94004			5.87551		5.7554		5.9634				6.09467				6.06505	Annexin A5	collagen-containing extracellular matrix, cytoplasm, cytosol, endothelial microparticle, external side of plasma membrane, extracellular exosome, extracellular region, focal adhesion, intracellular, membrane	calcium ion binding, calcium-dependent phospholipid binding, calcium-transporting ATPase activity, heparin binding, molecular adaptor activity, peptide hormone binding, phospholipase inhibitor activity, phospholipid binding, receptor tyrosine kinase binding	blood coagulation, cellular response to gonadotropin-releasing hormone, cellular response to lead ion, negative regulation of apoptotic process, negative regulation of blood coagulation, negative regulation of prolactin secretion, negative regulation of sequestering of calcium ion, platelet degranulation, positive regulation of apoptotic process, protein homooligomerization, regulation of flagell…	18.125	6	35914.4	4.67236	-0.33	0.00151854
Q13576	IQGAP2						6.14924			6.14161	5.73487	6.24499		6.00887	6.41387	6.55978		6.40192		6.47893		Ras GTPase-activating-like protein IQGAP2	actin cytoskeleton, cell surface, cytoplasm, cytosol, extracellular exosome, filopodium, lamellipodium, microtubule, microvillus, plasma membrane, secretory granule membrane	actin binding, actin filament binding, Arp2/3 complex binding, calmodulin binding, GTPase inhibitor activity, phosphatidylinositol-3,4,5-trisphosphate binding, Rac GTPase binding, Rho GTPase binding	Arp2/3 complex-mediated actin nucleation, neutrophil degranulation, signal transduction, thrombin-activated receptor signaling pathway	3.2381	5	180465	5.29443	-0.482984	0.0023081
P36542	ATP5F1C						6.37765	6.28906		6.23048	5.8239	6.35299		6.24163	6.52038	6.6601		6.48924		6.61858		ATP synthase subunit gamma, mitochondrial	membrane, mitochondrial inner membrane, mitochondrial matrix, mitochondrial proton-transporting ATP synthase complex, mitochondrial proton-transporting ATP synthase complex, catalytic core F(1), mitochondrion, myelin sheath	proton-transporting ATP synthase activity, rotational mechanism, RNA binding, transmembrane transporter activity	ATP biosynthetic process, ATP synthesis coupled proton transport, cristae formation, mitochondrial ATP synthesis coupled proton transport, oxidative phosphorylation	12.4161	4	32975.3	9.60791	-0.179866	0.00335649
Q14247	CTTN						6.0945	5.35645	5.1305	6.05723	5.26007	5.67959		5.70481	5.96966	6.17524		6.15495		6.50186		Src substrate cortactin	cell cortex, clathrin-coated pit, cortical cytoskeleton, cytoplasm, cytoskeleton, cytosol, dendritic spine, focal adhesion, Golgi apparatus, intracellular membrane-bounded organelle, lamellipodium, mitotic spindle midzone, plasma membrane, podosome, ruffle, voltage-gated potassium channel complex	cadherin binding, profilin binding	actin cytoskeleton reorganization, actin filament polymerization, cell motility, dendritic spine maintenance, focal adhesion assembly, intracellular protein transport, lamellipodium organization, membrane organization, negative regulation of extrinsic apoptotic signaling pathway, neuron projection morphogenesis, positive regulation of actin filament polymerization, positive regulation of smooth m…	7.81818	3	61548.5	5.03467	-1.08309	0.00541176

## Sheet: Temperature
Uniprot Accession	GeneID	4 ˚C				17 ˚C				30 ˚C				41 ˚C				47 ˚C				Name	GOComponent	GOFunction	GOProcess	Coverage(%)	#Peptides	MW(Da)	pI	GRAVY	q-value
		Rep1	Rep2	Rep3	Control	Rep1	Rep2	Rep3	Control	Rep1	Rep2	Rep3	Control	Rep1	Rep2	Rep3	Control	Rep1	Rep2	Rep3	Control
P01024	C3	9.1817	9.02525	9.12833	8.4173	8.7232	8.87196	8.81798	8.47679	8.70964	8.84129	8.33892	8.02613	8.85375	9.12919	9.09171	8.83282	9.68415	9.61683	9.58261	9.46956	Complement C3	azurophil granule lumen, blood microparticle, endoplasmic reticulum lumen, extracellular exosome, extracellular region, extracellular space, plasma membrane, protein-containing complex, secretory granule lumen	C5L2 anaphylatoxin chemotactic receptor binding, endopeptidase inhibitor activity, serine-type endopeptidase activity, signaling receptor binding	amyloid-beta clearance, cell surface receptor signaling pathway involved in cell-cell signaling, cellular protein metabolic process, complement activation, complement activation, alternative pathway, complement activation, classical pathway, fatty acid metabolic process, G protein-coupled receptor signaling pathway, immune response, inflammatory response, neutrophil degranulation, phagocytosis, e…	86.7108	275	187030	5.95068	-0.320265	8.59481e-16
P03952	KLKB1	8.92113	8.77057	8.7189	6.52725	8.20666	8.23749	8.18894	6.6062	8.30413	8.45351	7.80014	6.32631	8.33282	8.36486	8.24033	6.75091	8.41401	8.26472	8.26796	7.63803	Plasma kallikrein	extracellular exosome, extracellular region, extracellular space, plasma membrane	serine-type endopeptidase activity	blood coagulation, intrinsic pathway, extracellular matrix disassembly, Factor XII activation, fibrinolysis, plasminogen activation, positive regulation of fibrinolysis, proteolysis, zymogen activation	76.3323	65	71322.8	7.96045	-0.263009	1.26206e-15
P03951	F11	9.52431	9.45699	9.44732	7.26563	9.2777	9.24008	9.29854	6.88846	9.36584	9.43144	8.50212	6.36615	8.37557	8.48931	8.49184	6.37246	7.59491	7.61073	7.68389	6.77627	Coagulation factor XI	extracellular exosome, extracellular region, extracellular space, membrane, plasma membrane	heparin binding, identical protein binding, serine-type aminopeptidase activity, serine-type endopeptidase activity	blood coagulation, blood coagulation, intrinsic pathway, plasminogen activation, positive regulation of fibrinolysis	91.04	122	70063.6	7.83057	-0.26304	2.19677e-15
P06396	GSN	8.24384	8.19846	8.195	7.61841	7.9144	7.97508	7.93166	7.71798	8.06932	7.98968	7.36197	6.90301	8.8596	8.87733	8.71491	7.85648	9.23687	9.15134	9.16304	8.98914	Gelsolin	actin cap, actin cytoskeleton, blood microparticle, cortical actin cytoskeleton, cytoplasm, cytosol, extracellular exosome, extracellular region, extracellular space, ficolin-1-rich granule lumen, focal adhesion, lamellipodium, myelin sheath, perinuclear region of cytoplasm, phagocytic vesicle, plasma membrane, podosome, ruffle, sarcoplasm, secretory granule lumen	actin binding, actin filament binding, calcium ion binding, myosin II binding	actin filament capping, actin filament polymerization, actin filament reorganization, actin filament severing, actin nucleation, aging, amyloid fibril formation, barbed-end actin filament capping, cellular protein metabolic process, cellular response to cadmium ion, cellular response to interferon-gamma, cilium assembly, hepatocyte apoptotic process, negative regulation of viral entry into host c…	48.7212	52	85644.2	5.8208	-0.414578	2.99429e-15
P07437	TUBB	7.2049	7.16936	7.36321	7.26205	7.70965	7.34519	7.55255	7.14894	6.82123	7.95693	7.01869	5.99454	8.0114	8.38978	8.1751	7.79227	7.06886				Tubulin beta chain	azurophil granule lumen, cell body, cytoplasm, cytoplasmic ribonucleoprotein granule, cytoskeleton, extracellular exosome, extracellular region, membrane raft, microtubule, nuclear envelope lumen, nucleus	GTP binding, GTPase activating protein binding, GTPase activity, MHC class I protein binding, protein domain specific binding, protein-containing complex binding, structural constituent of cytoskeleton, structural molecule activity, ubiquitin protein ligase binding	cell division, cellular process, ciliary basal body-plasma membrane docking, cytoskeleton-dependent intracellular transport, G2/M transition of mitotic cell cycle, microtubule cytoskeleton organization, microtubule-based process, mitotic cell cycle, natural killer cell mediated cytotoxicity, neutrophil degranulation, regulation of G2/M transition of mitotic cell cycle, regulation of synapse organ…	15.991	7	49639	4.53564	-0.347973	3.53504e-15
P02671	FGA	10.0258	10.0316	10.4344	9.4971	10.6747	10.7453	10.7859	9.87301	9.28854	10.4587	9.30117	8.06266	9.42238	10.2307	10.2997	8.97866	10.7321	10.6654	10.6294	10.523	Fibrinogen alpha chain	blood microparticle, cell cortex, cell surface, collagen-containing extracellular matrix, endoplasmic reticulum lumen, external side of plasma membrane, extracellular exosome, extracellular region, extracellular space, extracellular vesicle, fibrinogen complex, plasma membrane, platelet alpha granule, platelet alpha granule lumen, synapse	extracellular matrix structural constituent, metal ion binding, signaling receptor binding, structural molecule activity	adaptive immune response, blood coagulation, blood coagulation, common pathway, blood coagulation, fibrin clot formation, cell-matrix adhesion, cellular protein metabolic process, cellular protein-containing complex assembly, extracellular matrix organization, fibrinolysis, induction of bacterial agglutination, innate immune response, negative regulation of blood coagulation, common pathway, nega…	81.4088	261	94914.4	5.58838	-0.821709	3.92549e-15
P01591	JCHAIN	8.34127	8.31171	8.30052	7.75282	8.11732	8.25921	8.14633	8.18023	8.30112	8.13982	7.7398	7.15138	8.051	7.99538	7.93191	7.80905	8.01827	7.88683	7.88988	7.56104	Immunoglobulin J chain	blood microparticle, dimeric IgA immunoglobulin complex, extracellular exosome, extracellular region, extracellular space, monomeric IgA immunoglobulin complex, pentameric IgM immunoglobulin complex, secretory dimeric IgA immunoglobulin complex, secretory IgA immunoglobulin complex	antigen binding, IgA binding, immunoglobulin receptor binding, protein binding, bridging, protein homodimerization activity	adaptive immune response, antibacterial humoral response, glomerular filtration, immune response, innate immune response, leukocyte migration, positive regulation of protein oligomerization, positive regulation of respiratory burst, receptor-mediated endocytosis, retina homeostasis	72.956	13	18087	4.8501	-0.337736	6.07341e-15
Q9Y490	TLN1	8.21722	8.1698	8.39461	7.8165	8.35847	8.32893	8.37063	7.85289	8.461	8.53586	8.03404	6.81012	8.90795	9.0033	8.85191	8.3303	7.82326	7.70688	7.40777	7.20082	Talin-1	cell surface, cytoskeleton, cytosol, extracellular exosome, extracellular region, focal adhesion, ruffle, ruffle membrane	actin filament binding, cadherin binding, integrin binding, LIM domain binding, phosphatidylinositol binding, phosphatidylserine binding, structural constituent of cytoskeleton, vinculin binding	cell-cell junction assembly, cell-substrate junction assembly, cortical actin cytoskeleton organization, cytoskeletal anchoring at plasma membrane, integrin activation, integrin-mediated signaling pathway, IRE1-mediated unfolded protein response, muscle contraction, platelet aggregation, platelet degranulation, viral process	74.7737	264	269599	5.67041	-0.240378	9.50914e-15
P08514	ITGA2B	8.17233	8.1618	8.31379	7.80433	8.31004	8.26758	8.32895	7.78185	7.75199	8.46111	7.63021	6.89938	8.74545	9.00789	8.82665	8.34139	7.58567	7.56728	7.36777	6.99072	Integrin alpha-IIb	blood microparticle, cell surface, external side of plasma membrane, extracellular exosome, focal adhesion, integrin complex, plasma membrane, platelet alpha granule membrane	extracellular matrix binding, fibrinogen binding, identical protein binding, metal ion binding	cell-matrix adhesion, extracellular matrix organization, integrin-mediated signaling pathway, platelet aggregation, platelet degranulation, positive regulation of leukocyte migration, regulation of megakaryocyte differentiation	51.3956	68	113306	5.00049	-0.107796	1.27762e-14
P21333	FLNA	8.48351	8.44327	8.64347	7.98704	8.45947	8.51524	8.49438	7.98149	8.30888	8.66764	7.96111	6.91834	9.0523	9.21828	9.03028	8.48942	8.07292	8.22719	8.08376	7.47632	Filamin-A	actin cytoskeleton, actin filament, apical dendrite, cell-cell junction, cortical cytoskeleton, cytoplasm, cytosol, dendritic shaft, extracellular exosome, extracellular region, focal adhesion, glutamatergic synapse, membrane, Myb complex, neuronal cell body, nucleolus, nucleus, perinuclear region of cytoplasm, plasma membrane, postsynapse, Z disc	actin filament binding, cadherin binding, Fc-gamma receptor I complex binding, G protein-coupled receptor binding, GTPase binding, ion channel binding, kinase binding, mu-type opioid receptor binding, potassium channel regulator activity, protein homodimerization activity, Rac GTPase binding, Ral GTPase binding, Rho GTPase binding, RNA binding, SMAD binding, small GTPase binding, transcription fa…	actin crosslink formation, actin cytoskeleton reorganization, adenylate cyclase-inhibiting dopamine receptor signaling pathway, cell junction assembly, cerebral cortex development, cilium assembly, cytoplasmic sequestering of protein, defense response to virus, establishment of protein localization, establishment of Sertoli cell barrier, formation of radial glial scaffolds, mitotic spindle assemb…	72.1949	256	280564	5.61572	-0.316698	1.57399e-14
P00738	HP	9.27208	9.09401	9.01167	7.74055	8.42213	8.54418	8.3934	8.09444	8.92068	8.54338	7.88541	7.68802	8.4974	9.27676	9.11108	8.21105	8.21139	8.23856	8.2627	8.16482	Haptoglobin	blood microparticle, endocytic vesicle lumen, extracellular exosome, extracellular region, extracellular space, haptoglobin-hemoglobin complex, specific granule lumen, tertiary granule lumen	antioxidant activity, hemoglobin binding, serine-type endopeptidase activity	acute inflammatory response, acute-phase response, defense response, defense response to bacterium, negative regulation of hydrogen peroxide catabolic process, negative regulation of oxidoreductase activity, neutrophil degranulation, positive regulation of cell death, receptor-mediated endocytosis, response to hydrogen peroxide, response to organic substance	47.2906	32	45176.6	6.10791	-0.421182	2.21292e-14
P02675	FGB	9.95314	9.94623	10.3338	9.6127	10.595	10.6656	10.6881	10.0402	9.30505	10.4469	9.40579	8.29726	9.44813	10.1642	10.2508	9.03644	10.7198	10.6394	10.6276	10.5194	Fibrinogen beta chain	blood microparticle, cell cortex, cell surface, collagen-containing extracellular matrix, endoplasmic reticulum, external side of plasma membrane, extracellular exosome, extracellular region, extracellular space, extracellular vesicle, fibrinogen complex, plasma membrane, platelet alpha granule, platelet alpha granule lumen, synapse	chaperone binding, extracellular matrix structural constituent, signaling receptor binding, structural molecule activity	adaptive immune response, blood coagulation, blood coagulation, fibrin clot formation, cell-matrix adhesion, cellular protein-containing complex assembly, cellular response to interleukin-1, cellular response to leptin stimulus, extracellular matrix organization, fibrinolysis, induction of bacterial agglutination, innate immune response, negative regulation of endothelial cell apoptotic process, …	89.002	296	55892.3	8.13135	-0.758452	2.77995e-14
Q9H4B7	TUBB1	8.09144	8.13733	8.27867	7.59812	8.21046	8.13994	8.28992	7.55468	7.6927	8.43238	7.33647	6.39469	8.65001	8.92478	8.65378	8.20449	7.96949	7.94677	7.96867	7.15994	Tubulin beta-1 chain	cytoplasm, extracellular exosome, microtubule	GTP binding, GTPase activity, structural constituent of cytoskeleton	microtubule cytoskeleton organization, microtubule-based process, mitotic cell cycle, spindle assembly	81.5965	46	50294.6	4.84326	-0.242794	3.33961e-14
P04114	APOB	9.67657	9.64563	9.57897	8.91783	9.19445	9.36144	9.3151	9.06502	9.01663	9.44445	8.87495	8.38265	9.3305	9.6233	9.6632	9.6913	9.52304	9.37683	9.32247	9.14802	Apolipoprotein B-100	chylomicron, chylomicron remnant, clathrin-coated endocytic vesicle membrane, cytoplasm, cytosol, early endosome, endocytic vesicle lumen, endoplasmic reticulum exit site, endoplasmic reticulum lumen, endoplasmic reticulum membrane, endosome lumen, endosome membrane, extracellular exosome, extracellular region, extracellular space, high-density lipoprotein particle, intermediate-density lipoprote…	cholesterol transporter activity, heparin binding, lipase binding, low-density lipoprotein particle receptor binding, phospholipid binding	artery morphogenesis, cellular protein metabolic process, cellular response to prostaglandin stimulus, cellular response to tumor necrosis factor, cholesterol efflux, cholesterol homeostasis, cholesterol metabolic process, cholesterol transport, chylomicron assembly, chylomicron remnant clearance, chylomicron remodeling, fertilization, flagellated sperm motility, in utero embryonic development, l…	82.3362	968	515283	6.57275	-0.296428	4.00938e-14
P02787	TF	9.16159	9.00626	8.95448	7.59619	8.28389	8.56755	8.34572	7.81865	8.76876	8.61075	7.9144	7.38314	8.50925	9.3329	9.23983	8.26534	8.07154	8.01377	8.01754	7.82163	Serotransferrin	apical plasma membrane, basal part of cell, basal plasma membrane, blood microparticle, cell surface, clathrin-coated pit, clathrin-coated vesicle membrane, cytoplasmic vesicle, early endosome, endocytic vesicle, endoplasmic reticulum lumen, endosome membrane, extracellular exosome, extracellular region, extracellular space, extrinsic component of external side of plasma membrane, HFE-transferrin…	ferric iron binding, ferric iron transmembrane transporter activity, ferrous iron binding, iron chaperone activity, transferrin receptor binding	cellular iron ion homeostasis, cellular protein metabolic process, cellular response to iron ion, iron ion homeostasis, membrane organization, platelet degranulation, positive regulation of receptor-mediated endocytosis, post-translational protein modification, regulation of iron ion import, regulation of protein stability, retina homeostasis, transferrin transport	75.5014	106	77013.6	6.70264	-0.336246	4.66713e-14
P04004	VTN	9.71339	9.67935	9.70391	8.14539	9.03909	9.01777	9.09747	8.06512	9.38358	9.28806	8.82136	7.62941	9.79553	9.80841	9.69069	8.68349	9.80136	9.62012	9.56917	9.50941	Vitronectin	alphav-beta3 integrin-vitronectin complex, basement membrane, blood microparticle, collagen-containing extracellular matrix, endoplasmic reticulum, extracellular exosome, extracellular region, extracellular space, Golgi lumen, intracellular membrane-bounded organelle, rough endoplasmic reticulum lumen	collagen binding, extracellular matrix binding, extracellular matrix structural constituent, heparin binding, identical protein binding, integrin binding, polysaccharide binding, scavenger receptor activity	cell adhesion, cell adhesion mediated by integrin, cell migration, cell proliferation, cell-matrix adhesion, endodermal cell differentiation, extracellular matrix organization, immune response, liver regeneration, negative regulation of blood coagulation, negative regulation of endopeptidase activity, oligodendrocyte differentiation, positive regulation of cell-substrate adhesion, positive regula…	72.1757	62	54271.2	5.39697	-0.723431	5.51823e-14
P06576	ATP5F1B	7.22599	7.22059	7.33306	6.92276	7.10186	7.36306	7.17028	6.90868	7.11812	7.41216	6.56471	6.38798	7.82842	7.96572	7.73664	7.36255					ATP synthase subunit beta, mitochondrial	cell surface, extracellular exosome, membrane, mitochondrial matrix, mitochondrial membrane, mitochondrial nucleoid, mitochondrial proton-transporting ATP synthase complex, mitochondrial proton-transporting ATP synthase, catalytic core, mitochondrion, myelin sheath, nucleus, plasma membrane, proton-transporting ATP synthase complex	angiostatin binding, ATP binding, MHC class I protein binding, proton-transporting ATP synthase activity, rotational mechanism, proton-transporting ATPase activity, rotational mechanism, transmembrane transporter activity, transporter activity	angiogenesis, ATP biosynthetic process, cristae formation, generation of precursor metabolites and energy, lipid metabolic process, mitochondrial ATP synthesis coupled proton transport, mitochondrion organization, negative regulation of cell adhesion involved in substrate-bound cell migration, osteoblast differentiation, positive regulation of blood vessel endothelial cell migration, proton trans…	56.5217	28	56524.6	5.05518	0.0181474	7.08959e-14
Q92954	PRG4	7.85072	7.7263	7.80092	6.43097	7.15114	7.27611	7.33892	5.93278	7.53752	7.65485	7.30051	6.0769	8.19727	8.26024	8.23785	6.89879	8.29452	8.20468	8.00872	7.76463	Proteoglycan 4	collagen-containing extracellular matrix	extracellular matrix structural constituent conferring compression resistance, polysaccharide binding, scavenger receptor activity	cell proliferation, immune response	21.51	35	150968	9.94971	-1.03041	7.96141e-14
P02730	SLC4A1	8.42284	8.37851	8.3883	8.05704	7.83901	7.89415	7.8064	8.20598	7.98884	7.94483	7.519	7.40526	8.29603	8.12696	8.06751	8.31261	7.36312	7.40248	7.48452	7.0864	Band 3 anion transport protein	basolateral plasma membrane, blood microparticle, cortical cytoskeleton, extracellular exosome, integral component of membrane, integral component of plasma membrane, plasma membrane, Z disc	anion transmembrane transporter activity, anion:anion antiporter activity, ankyrin binding, bicarbonate transmembrane transporter activity, chloride transmembrane transporter activity, inorganic anion exchanger activity, protein homodimerization activity, protein membrane anchor	anion transport, bicarbonate transport, cellular ion homeostasis, chloride transport, regulation of intracellular pH	38.5291	36	101727	4.85693	0.213282	8.81773e-14
P00742	F10	6.80927	6.65203	6.14863	5.07973					6.37728			5.66176	6.06522	6.60786	6.50092	6.26877	7.79012	7.68278	7.79153	7.82163	Coagulation factor X	endoplasmic reticulum lumen, extracellular region, extracellular space, Golgi lumen, intrinsic component of external side of plasma membrane, plasma membrane	calcium ion binding, phospholipid binding, serine-type endopeptidase activity	blood coagulation, blood coagulation, extrinsic pathway, ER to Golgi vesicle-mediated transport, positive regulation of cell migration, positive regulation of protein kinase B signaling	35.4508	16	54696.5	5.5542	-0.579713	9.65208e-14
P05160	F13B	7.05761	7.10799	7.29157	6.60681	8.47655	8.50877	8.52551	7.43276	7.24161	8.18737	6.21883	6.03873	6.28794	7.3766	7.39203	5.87741	6.53522	6.07914		5.85415	Coagulation factor XIII B chain	extracellular region		blood coagulation, blood coagulation, fibrin clot formation, negative regulation of cellular protein catabolic process	54.9168	37	75461.2	5.95068	-0.551437	1.04206e-13
P22792	CPN2	7.00567	6.95768	6.8444	6.24335		6.526			6.70973		5.87658	6.15937	6.59641	6.95067	6.87617	6.62546	8.51223	8.42193	8.40848	8.26858	Carboxypeptidase N subunit 2	blood microparticle, extracellular exosome, extracellular matrix, extracellular region, extracellular space	enzyme regulator activity, metallocarboxypeptidase activity	protein stabilization, regulation of complement activation	49.7248	17	60518.1	5.5542	0.0680734	1.13565e-13
P19823	ITIH2	8.32102	8.04121	8.05412	7.33161	7.43468	7.64004	7.46208	7.43768	7.6445	7.76786	6.80324	7.29687	8.00372	8.33698	8.24186	8.02819	9.14239	9.03781	9.02211	8.87088	Inter-alpha-trypsin inhibitor heavy chain H2	blood microparticle, collagen-containing extracellular matrix, endoplasmic reticulum lumen, extracellular exosome, extracellular region	endopeptidase inhibitor activity, serine-type endopeptidase inhibitor activity	cellular protein metabolic process, hyaluronan metabolic process, post-translational protein modification	45.9831	48	106397	6.38818	-0.292706	1.23869e-13
P02751	FN1	9.30898	9.05737	9.52983	8.50684	9.40405	9.38287	9.38603	8.76437	8.11129	9.2485	8.24835	7.2363	8.70536	9.26146	9.10169	8.35704	9.16283	9.0906	9.03228	8.90742	Fibronectin	apical plasma membrane, basement membrane, blood microparticle, collagen-containing extracellular matrix, endoplasmic reticulum lumen, endoplasmic reticulum-Golgi intermediate compartment, extracellular exosome, extracellular matrix, extracellular region, extracellular space, fibrinogen complex, platelet alpha granule lumen	chaperone binding, collagen binding, disordered domain specific binding, enzyme binding, extracellular matrix structural constituent, heparin binding, identical protein binding, integrin binding, peptidase activator activity, protease binding, protein C-terminus binding, proteoglycan binding, signaling receptor binding	acute-phase response, angiogenesis, calcium-independent cell-matrix adhesion, cell adhesion, cell-substrate junction assembly, cellular protein metabolic process, cytokine-mediated signaling pathway, endodermal cell differentiation, extracellular matrix organization, integrin activation, interaction with other organism via secreted substance involved in symbiotic interaction, interaction with sym…	71.5842	306	262460	5.30811	-0.542582	1.34336e-13
P01861	IGHG4	9.44932	9.31195	9.20641	8.39158	8.61124	8.9615	8.78885	8.69344	9.07253	8.8749	8.74961	7.89451	9.08625	9.22588	9.11928	8.78425	9.46343	9.37777	9.2662	8.98331	Immunoglobulin heavy constant gamma 4	blood microparticle, external side of plasma membrane, extracellular exosome, extracellular region, extracellular space, immunoglobulin complex, circulating	antigen binding, immunoglobulin receptor binding, serine-type endopeptidase activity	B cell receptor signaling pathway, complement activation, complement activation, classical pathway, cytokine-mediated signaling pathway, defense response to bacterium, Fc-gamma receptor signaling pathway involved in phagocytosis, innate immune response, phagocytosis, engulfment, phagocytosis, recognition, positive regulation of B cell activation, regulation of complement activation	54.4343	19	35917.9	7.0376	-0.42263	1.4508e-13
P00450	CP	8.20742	8.06328	8.01859	7.11605	7.3429	7.61054	7.36254	7.24316	7.80019	7.66914	7.05256	6.9989	7.8552	8.41167	8.29558	7.8625	9.05679	8.9642	8.98954	8.85757	Ceruloplasmin	blood microparticle, endoplasmic reticulum lumen, extracellular exosome, extracellular region, extracellular space, lysosomal membrane	chaperone binding, copper ion binding, ferroxidase activity, oxidoreductase activity, oxidizing metal ions	cellular iron ion homeostasis, cellular protein metabolic process, copper ion transport, post-translational protein modification	68.3568	79	122128	5.30811	-0.535962	1.64515e-13
P08697	SERPINF2	7.95075	7.81791	7.89159	7.06584	7.6617	7.79826	7.65719	7.22413	7.37513	7.64303	6.87258	6.73825	7.82351	8.0734	8.01444	7.57692	8.67779	8.6589	8.59623	8.46923	Alpha-2-antiplasmin	blood microparticle, cell surface, collagen-containing extracellular matrix, extracellular exosome, extracellular region, extracellular space, fibrinogen complex, platelet alpha granule lumen	endopeptidase inhibitor activity, protease binding, protein homodimerization activity, serine-type endopeptidase inhibitor activity	acute-phase response, blood vessel morphogenesis, collagen fibril organization, fibrinolysis, negative regulation of endopeptidase activity, negative regulation of fibrinolysis, negative regulation of plasminogen activation, platelet degranulation, positive regulation of cell differentiation, positive regulation of cell-cell adhesion mediated by cadherin, positive regulation of collagen biosynthe…	55.6008	27	54531.1	5.82764	-0.124033	1.83567e-13
P09871	C1S	7.77283	7.58086	7.5699	6.98559	6.76468	7.41646	6.9438	7.08194	7.16952	7.21464	6.72577	6.6764	7.40226	7.642	7.62344	7.46777	9.05525	8.95461	8.93859	8.89841	Complement C1s subcomponent	blood microparticle, extracellular region, extracellular space	calcium ion binding, identical protein binding, serine-type endopeptidase activity	complement activation, complement activation, classical pathway, innate immune response, regulation of complement activation	57.2674	48	76634.8	4.604	-0.37064	2.04564e-13
P15169	CPN1	7.43162	7.44638	7.39281		6.57928	6.8297	5.99407	5.63066	6.56313	5.36712	5.70944	4.93159	7.70179	7.68274	7.58148	7.30119	8.47323	8.33974	8.3648	8.27451	Carboxypeptidase N catalytic chain	extracellular region, extracellular space	metallocarboxypeptidase activity, zinc ion binding	bradykinin catabolic process, peptide metabolic process, protein processing, regulation of complement activation, response to glucocorticoid	34.0611	16	52253.3	6.90771	-0.475546	2.28378e-13
P00747	PLG	8.96912	8.74736	8.89313	7.68665	8.57272	8.64277	8.59992	7.72008	8.19442	8.55117	7.64193	7.19175	8.41061	8.71182	8.72456	8.04367	9.19072	9.03693	9.08036	8.89465	Plasminogen	blood microparticle, cell surface, collagen-containing extracellular matrix, extracellular exosome, extracellular region, extracellular space, extrinsic component of external side of plasma membrane, other organism cell membrane, plasma membrane, platelet alpha granule lumen	apolipoprotein binding, chaperone binding, endopeptidase activity, enzyme binding, kinase binding, proteasome core complex binding, protein antigen binding, protein domain specific binding, serine-type endopeptidase activity, serine-type peptidase activity, signaling receptor binding	blood coagulation, cellular protein metabolic process, extracellular matrix disassembly, fibrinolysis, interaction with symbiont, interaction with symbiont via secreted substance involved in symbiotic interaction, modification by host of symbiont morphology or physiology via secreted substance, negative regulation of cell proliferation, negative regulation of cell-cell adhesion mediated by cadher…	79.8765	118	90510.2	6.84619	-0.687531	2.85343e-13
P08519	LPA	9.00246	8.95478	8.80868	8.3417	8.05848	8.479	8.44488	8.26254	8.14854	8.49324	8.18504	7.39274	8.41396	8.44959	8.52916	9.07115	8.06882	7.97509	8.15225	8.11563	Apolipoprotein(a)	extracellular region, plasma lipoprotein particle	apolipoprotein binding, endopeptidase inhibitor activity, fibronectin binding, heparin binding, serine-type endopeptidase activity	blood circulation, lipid metabolic process, lipid transport, low-density lipoprotein particle remodeling	54.2436	112	500995	5.48584	-0.725044	3.2363e-13
P01031	C5	7.59603	7.42418	7.40589	6.5989	7.23673	7.41008	7.32913	6.91407	7.04678	7.26286	6.61567	6.58276	7.72599	7.9412	7.90242	7.511	9.24091	9.12262	9.08795	8.98603	Complement C5	extracellular exosome, extracellular region, extracellular space, membrane attack complex	chemokine activity, endopeptidase inhibitor activity, signaling receptor binding	activation of MAPK activity, cell surface receptor signaling pathway, chemotaxis, complement activation, alternative pathway, complement activation, classical pathway, cytolysis, G protein-coupled receptor signaling pathway, in utero embryonic development, inflammatory response, negative regulation of macrophage chemotaxis, positive regulation of angiogenesis, positive regulation of chemokine sec…	74.0453	143	188186	6.06689	-0.176372	3.85631e-13
P00739	HPR	8.35833	8.3035	8.15295	7.56143	7.82454	7.80285	7.83587	7.76773	7.98285	7.84953	6.59284	7.04512	7.88318	8.12569	7.95255	7.91975	8.6443	8.58932	8.52998	8.45842	Haptoglobin-related protein	blood microparticle, extracellular exosome, extracellular region, extracellular space, spherical high-density lipoprotein particle	hemoglobin binding, serine-type endopeptidase activity	acute inflammatory response, positive regulation of cell death, receptor-mediated endocytosis, response to organic substance	49.7126	18	39004.7	6.65479	-0.306897	4.48449e-13
P02790	HPX	8.65311	8.52302	8.46907	7.33596	7.80294	8.07782	7.96258	7.59351	8.29212	8.06996	7.29969	7.40965	7.84131	8.70454	8.53574	7.82122	8.52125	8.52328	8.46331	8.3435	Hemopexin	blood microparticle, collagen-containing extracellular matrix, endocytic vesicle lumen, extracellular exosome, extracellular region, extracellular space	heme transporter activity, metal ion binding	cellular iron ion homeostasis, heme metabolic process, heme transport, hemoglobin metabolic process, positive regulation of humoral immune response mediated by circulating immunoglobulin, positive regulation of immunoglobulin production, positive regulation of interferon-gamma-mediated signaling pathway, positive regulation of tyrosine phosphorylation of STAT protein, proteolysis, receptor-mediat…	66.2338	39	51643.3	6.55225	-0.434199	5.17046e-13
P00751	CFB	8.2673	8.02012	7.9554	6.80051	7.24062	7.47708	7.17555	7.35659	7.86833	7.48498	6.99353	6.68715	8.40139	8.54449	8.39007	7.50966	9.60891	9.42844	9.42411	9.33688	Complement factor B	blood microparticle, extracellular exosome, extracellular region, extracellular space, plasma membrane	complement binding, serine-type endopeptidase activity	complement activation, complement activation, alternative pathway, regulation of complement activation	65.3141	65	85478.5	6.62744	-0.501047	6.70479e-13
P00736	C1R	7.62213	7.50313	7.33857	6.73101	6.79601	7.29807	6.80178	6.91456	7.16388	6.87758	6.68388	6.30804	7.48836	7.64031	7.54568	7.49515	9.02629	8.92388	8.92461	8.8473	Complement C1r subcomponent	blood microparticle, extracellular exosome, extracellular region, extracellular space	calcium ion binding, serine-type endopeptidase activity, serine-type peptidase activity	complement activation, complement activation, classical pathway, immune response, innate immune response, regulation of complement activation, zymogen activation	64.3972	58	80066.8	5.75928	-0.509929	7.90753e-13
P02768	ALB	10.4488	10.2251	10.2112	9.10464	9.59799	9.94339	9.65556	9.12034	10.0904	9.94267	9.47009	8.97021	9.77173	10.562	10.4829	9.62464	9.80917	9.76928	9.62401	9.44845	Serum albumin	blood microparticle, endoplasmic reticulum, endoplasmic reticulum lumen, extracellular exosome, extracellular region, extracellular space, Golgi apparatus, myelin sheath, nucleus, platelet alpha granule lumen, protein-containing complex	antioxidant activity, chaperone binding, copper ion binding, DNA binding, drug binding, fatty acid binding, identical protein binding, pyridoxal phosphate binding, toxic substance binding	cellular protein metabolic process, cellular response to starvation, hemolysis by symbiont of host erythrocytes, high-density lipoprotein particle remodeling, maintenance of mitochondrion location, negative regulation of apoptotic process, negative regulation of programmed cell death, platelet degranulation, post-translational protein modification, receptor-mediated endocytosis, retina homeostasis	93.1034	253	69321.5	5.84814	-0.353859	9.21852e-13
P02679	FGG	10.0457	10.053	10.374	9.54406	10.6701	10.7062	10.8054	10.041	9.38808	10.5329	9.31018	8.26931	9.57147	10.1937	10.2617	9.10895	10.7465	10.642	10.6489	10.5523	Fibrinogen gamma chain	blood microparticle, cell surface, collagen-containing extracellular matrix, endoplasmic reticulum lumen, external side of plasma membrane, extracellular exosome, extracellular region, extracellular space, fibrinogen complex, plasma membrane, platelet alpha granule, platelet alpha granule lumen	cell adhesion molecule binding, extracellular matrix structural constituent, metal ion binding, protein homodimerization activity, signaling receptor binding, structural molecule activity	blood coagulation, blood coagulation, fibrin clot formation, cell-matrix adhesion, cellular protein metabolic process, cellular protein-containing complex assembly, cellular response to interleukin-1, cellular response to interleukin-6, extracellular matrix organization, fibrinolysis, negative regulation of endothelial cell apoptotic process, negative regulation of extrinsic apoptotic signaling p…	88.521	208	51478.9	5.19189	-0.5883	1.05153e-12
O00151	PDLIM1	6.76543	6.72536	6.85918	6.27082	6.80486	6.90315	6.98349	6.11954	6.77676	7.08164	5.83324		7.48029	7.60178	7.31154	6.63796	6.61807				PDZ and LIM domain protein 1	cell-cell adherens junction, cytoskeleton, focal adhesion, transcription factor complex, Z disc	cadherin binding involved in cell-cell adhesion, metal ion binding, transcription coactivator activity	regulation of transcription, DNA-templated, response to hypoxia, response to oxidative stress	72.6444	15	36049	6.58643	-0.521884	1.18711e-12
P05546	SERPIND1	7.96084	7.79561	7.61012	7.03524	6.8705	7.28674	7.11219	6.90247	7.26557	7.24063	6.65568	6.99392	7.50311	7.89423	7.78804	7.3309	9.04544	8.85021	8.67664	8.17889	Heparin cofactor 2	endoplasmic reticulum lumen, extracellular exosome, extracellular region, extracellular space	endopeptidase inhibitor activity, heparin binding, serine-type endopeptidase inhibitor activity	blood coagulation, cellular protein metabolic process, chemotaxis, negative regulation of endopeptidase activity, post-translational protein modification	54.9098	27	57034.2	6.42236	-0.235671	1.33183e-12
P02765	AHSG	8.86635	8.71874	8.48682	7.98222	7.82205	8.03062	7.86938	7.78394	8.37601	8.07059	7.47866	7.81099	8.06865	8.62869	8.56274	8.17298	9.34108	9.19336	9.21615	9.27561	Alpha-2-HS-glycoprotein	blood microparticle, collagen-containing extracellular matrix, endoplasmic reticulum lumen, extracellular exosome, extracellular region, extracellular space, Golgi apparatus, platelet alpha granule lumen, secretory granule lumen	cysteine-type endopeptidase inhibitor activity, kinase inhibitor activity	acute-phase response, cellular protein metabolic process, negative regulation of bone mineralization, negative regulation of endopeptidase activity, negative regulation of insulin receptor signaling pathway, neutrophil degranulation, ossification, pinocytosis, platelet degranulation, positive regulation of phagocytosis, post-translational protein modification, regulation of bone mineralization, r…	38.4196	16	39315.7	5.30127	-0.189646	1.47086e-12
P12955	PEPD		5.65956	5.76153				5.24396						6.59811	6.42939	6.63419	5.90529	7.6257	7.66319	7.6822	6.58424	Xaa-Pro dipeptidase	extracellular exosome, nucleoplasm, nucleus	aminopeptidase activity, manganese ion binding, metallocarboxypeptidase activity, proline dipeptidase activity	cellular amino acid metabolic process, collagen catabolic process, proteolysis	35.6998	15	54512.9	5.56104	-0.129615	1.60649e-12
P01023	A2M	8.52752	8.34071	8.29571	7.31728	7.91722	8.09385	7.93596	7.64646	8.10861	8.0693	7.49096	7.26993	7.84032	8.65007	8.58857	7.77918	9.01046	8.83756	8.77083	8.64301	Alpha-2-macroglobulin	blood microparticle, collagen-containing extracellular matrix, cytosol, extracellular exosome, extracellular region, platelet alpha granule lumen	calcium-dependent protein binding, enzyme binding, growth factor binding, GTPase activator activity, interleukin-1 binding, interleukin-8 binding, protease binding, serine-type endopeptidase inhibitor activity, signaling receptor binding, tumor necrosis factor binding	blood coagulation, intrinsic pathway, extracellular matrix disassembly, negative regulation of complement activation, lectin pathway, platelet degranulation, regulation of small GTPase mediated signal transduction, stem cell differentiation	67.7069	113	163188	5.99854	-0.195047	1.73846e-12
P80108	GPLD1	7.05487	7.00109	6.7751	6.24483		6.49359		5.92791	6.13418	6.50579	5.77076	6.06001	6.70079	7.07847	6.98956	6.69267	8.11501	8.01868	8.06344	7.95029	Phosphatidylinositol-glycan-specific phospholipase D	cytoplasm, extracellular exosome, extracellular matrix, extracellular region, extracellular space, intracellular, intracellular membrane-bounded organelle, lysosomal membrane	glycosylphosphatidylinositol phospholipase D activity, phospholipase D activity, sodium channel regulator activity	C-terminal protein lipidation, cell migration involved in sprouting angiogenesis, cellular response to calcium ion, cellular response to cholesterol, cellular response to drug, cellular response to insulin stimulus, cellular response to pH, cellular response to triglyceride, chondrocyte differentiation, complement receptor mediated signaling pathway, GPI anchor release, hematopoietic stem cell mi…	42.381	31	92278	5.88232	-0.130476	1.90116e-12
P06681	C2	6.80244	6.59562	6.18359	5.84698					6.45215		4.41589	5.66374	6.95391	7.24143	7.16593	6.65154	8.58192	8.44538	8.43694	8.36128	Complement C2	extracellular exosome, extracellular region, extracellular space	metal ion binding, serine-type endopeptidase activity	complement activation, complement activation, classical pathway, innate immune response, positive regulation of apoptotic cell clearance, regulation of complement activation, response to nutrient	55.1862	59	83214.3	7.04443	-0.298271	2.06036e-12
Q96IY4	CPB2	6.52771	6.27875	6.32323						6.45879		5.42274		7.5797	7.47447	7.47378	7.20544	8.5108	8.40048	8.51192	8.45832	Carboxypeptidase B2	cell, extracellular exosome, extracellular region, extracellular space	metallocarboxypeptidase activity, zinc ion binding	blood coagulation, cellular response to glucose stimulus, fibrinolysis, liver regeneration, negative regulation of fibrinolysis, negative regulation of hepatocyte proliferation, negative regulation of plasminogen activation, positive regulation of extracellular matrix constituent secretion, proteolysis, regulation of complement activation, response to drug, response to heat	57.6832	22	48393.4	7.42725	-0.162411	2.23771e-12
P11277	SPTB	7.65405	7.66007	7.66319	7.11366	7.14871	7.1227	7.14475	7.22389	7.30529	7.21366	6.91133	6.529	7.48466	7.57219	7.39127	7.3792	6.37124	6.3573	6.4143	5.80891	Spectrin beta chain, erythrocytic	actin cytoskeleton, cell surface, cytosol, Golgi apparatus, intrinsic component of the cytoplasmic side of the plasma membrane, protein-containing complex, spectrin, spectrin-associated cytoskeleton	actin binding, actin filament binding, ankyrin binding, Ras guanyl-nucleotide exchange factor activity, structural constituent of cytoskeleton	actin filament capping, axon guidance, ER to Golgi vesicle-mediated transport, MAPK cascade	58.1189	120	246316	4.93896	-0.670332	2.41374e-12
P05106	ITGB3	8.21416	8.21363	8.32117	7.67346	8.20998	8.27364	8.32027	7.68814	7.84915	8.48941	7.43831	6.59445	8.80861	9.05773	8.83978	8.2346	7.5073	7.34029	7.15637	6.6588	Integrin beta-3	alphav-beta3 integrin-HMGB1 complex, alphav-beta3 integrin-IGF-1-IGF1R complex, alphav-beta3 integrin-PKCalpha complex, alphav-beta3 integrin-vitronectin complex, cell surface, extracellular exosome, filopodium membrane, focal adhesion, glutamatergic synapse, integral component of plasma membrane, integrin alphav-beta3 complex, integrin complex, lamellipodium membrane, melanosome, microvillus mem…	cell adhesion molecule binding, coreceptor activity, enzyme binding, extracellular matrix binding, fibronectin binding, identical protein binding, integrin binding, platelet-derived growth factor receptor binding, protease binding, protein disulfide isomerase activity, vascular endothelial growth factor receptor 2 binding, virus receptor activity	activation of protein kinase activity, angiogenesis involved in wound healing, apolipoprotein A-I-mediated signaling pathway, apoptotic cell clearance, blood coagulation, cell adhesion, cell adhesion mediated by integrin, cell migration, cell-matrix adhesion, cell-substrate adhesion, extracellular matrix organization, heterotypic cell-cell adhesion, integrin-mediated signaling pathway, leukocyte …	64.3401	73	87000.4	4.8501	-0.332487	2.60531e-12
P33908	MAN1A1									5.42254				6.28853	6.28833		6.20746	7.66318	7.58236	7.55518	7.48836	Mannosyl-oligosaccharide 1,2-alpha-mannosidase IA	cytosol, endoplasmic reticulum, endoplasmic reticulum-Golgi intermediate compartment, extracellular exosome, Golgi apparatus, Golgi membrane, integral component of membrane, membrane	calcium ion binding, mannosidase activity, mannosyl-oligosaccharide 1,2-alpha-mannosidase activity	Golgi apparatus mannose trimming, N-glycan processing, protein glycosylation	34.1501	17	72922.3	6.00537	-0.265391	2.86069e-12
P14618	PKM	7.34652	7.37879	7.35607	6.64932	7.12818	7.2774	7.27367	6.72484	7.24792	7.50416	6.9888	6.16983	7.87508	7.91538	7.73623	7.38328	7.69379	7.66997	7.59463	7.33568	Pyruvate kinase PKM	cilium, collagen-containing extracellular matrix, cytoplasm, cytosol, extracellular exosome, extracellular region, extracellular vesicle, ficolin-1-rich granule lumen, mitochondrion, myelin sheath, nucleus, pyruvate kinase complex, secretory granule lumen, vesicle	ADP binding, ATP binding, cadherin binding, identical protein binding, kinase activity, magnesium ion binding, MHC class II protein complex binding, potassium ion binding, pyruvate kinase activity, RNA binding, thyroid hormone binding	animal organ regeneration, canonical glycolysis, cellular response to insulin stimulus, glycolytic process, liver development, neutrophil degranulation, positive regulation of sprouting angiogenesis, programmed cell death, protein homotetramerization, response to gravity, response to hypoxia, response to muscle inactivity, response to nutrient, skeletal muscle tissue regeneration	58.1921	28	57900	7.63232	-0.12806	3.15119e-12
P04275	VWF	7.61458	7.50541	7.84732	6.91145	7.80366	7.82581	7.8413	7.31814	6.93366	7.58654	6.65215	5.71123	7.82791	8.04483	7.86027	7.60738	7.91943	7.76186	7.59674	7.59625	von Willebrand factor	collagen-containing extracellular matrix, endoplasmic reticulum, extracellular exosome, extracellular region, platelet alpha granule, platelet alpha granule lumen, Weibel-Palade body	chaperone binding, collagen binding, extracellular matrix structural constituent, identical protein binding, immunoglobulin binding, integrin binding, protease binding, protein homodimerization activity, protein N-terminus binding	blood coagulation, blood coagulation, intrinsic pathway, cell adhesion, cell-substrate adhesion, extracellular matrix organization, hemostasis, platelet activation, platelet degranulation, protein homooligomerization, response to wounding	40.8816	88	309058	5.10303	-0.207856	3.43798e-12
Q14624	ITIH4	9.02446	9.04779	9.04863	7.34096	7.84697	8.0002	7.95832	7.5052	7.81374	7.73923	7.43792	7.08995	7.68026	8.18448	8.11395	7.53697	9.13722	9.01293	8.91551	8.66281	Inter-alpha-trypsin inhibitor heavy chain H4	blood microparticle, collagen-containing extracellular matrix, extracellular exosome, extracellular region, plasma membrane, platelet dense granule lumen	endopeptidase inhibitor activity, serine-type endopeptidase inhibitor activity	acute-phase response, hyaluronan metabolic process, platelet degranulation, response to cytokine	50.3226	62	103293	6.51807	-0.315484	3.84139e-12
P35858	IGFALS	6.99394	6.9157	6.84193	5.1255	6.04639	6.46328		5.94304	6.09274	5.78078		5.591	7.39454	7.57117	7.53366	7.40663	8.79898	8.68213	8.6802	8.52877	Insulin-like growth factor-binding protein complex acid labile subunit	extracellular exosome, extracellular matrix, extracellular region, extracellular space, insulin-like growth factor ternary complex, nucleoplasm	insulin-like growth factor binding	cell adhesion, cellular protein metabolic process, signal transduction	56.6942	36	65993.8	6.31982	0.018843	4.25915e-12
P12259	F5	8.53414	8.47605	8.47957	6.83314	7.77884	7.70688	7.93046	7.02466	7.96735	7.79968	7.39983	6.28997	8.22437	8.01549	7.99611	7.2634	8.20352	8.16309	8.00215	7.87684	Coagulation factor V	COPII-coated ER to Golgi transport vesicle, endoplasmic reticulum lumen, endoplasmic reticulum-Golgi intermediate compartment membrane, extracellular region, extracellular space, extracellular vesicle, Golgi membrane, membrane, plasma membrane, platelet alpha granule lumen	copper ion binding	blood circulation, blood coagulation, cellular protein metabolic process, COPII vesicle coating, ER to Golgi vesicle-mediated transport, platelet degranulation, post-translational protein modification	35.4317	94	251546	5.59521	-0.598741	4.6768e-12
P02774	GC	8.69754	8.68477	8.70591	8.08314	8.45415	8.57388	8.53483	8.19176	8.59827	8.70087	7.56196	7.26098	8.90168	9.05767	8.91324	8.31229	7.84583	7.78307	7.71818	7.47587	Vitamin D-binding protein	blood microparticle, cytosol, extracellular exosome, extracellular region, extracellular space, lysosomal lumen	actin binding, calcidiol binding, vitamin D binding, vitamin transmembrane transporter activity	vitamin D metabolic process, vitamin transport	67.5105	52	52882.9	5.12354	-0.336287	5.10777e-12
P68366	TUBA4A	7.74605	7.81945	7.92311	7.4379	7.83742	7.99858	7.92595	7.46855	7.77559	8.08116	7.4885	6.19062	8.53332	8.50367	8.34552	8.01401	7.37907	7.28086	6.72526	6.63089	Tubulin alpha-4A chain	cytoplasm, cytoskeleton, cytosol, extracellular exosome, extracellular region, microtubule, microtubule cytoskeleton	GTP binding, GTPase activity, protein kinase binding, structural constituent of cytoskeleton	ciliary basal body-plasma membrane docking, G2/M transition of mitotic cell cycle, microtubule cytoskeleton organization, microtubule-based process, mitotic cell cycle, platelet degranulation, regulation of G2/M transition of mitotic cell cycle	34.5982	15	49892.4	4.69971	-0.251563	5.60987e-12
P00734	F2	8.14452	7.93469	7.91228	7.16207	7.53285	7.70885	7.49348	7.1245	7.81145	7.61222	6.39219	7.24082	7.9285	8.23148	8.122	7.3753	8.13142	8.00681	7.90483	7.85751	Prothrombin	blood microparticle, endoplasmic reticulum lumen, extracellular exosome, extracellular region, extracellular space, Golgi lumen, plasma membrane	calcium ion binding, enzyme activator activity, growth factor activity, heparin binding, lipopolysaccharide binding, serine-type endopeptidase activity, signaling receptor binding, thrombospondin receptor activity	acute-phase response, antimicrobial humoral immune response mediated by antimicrobial peptide, blood coagulation, blood coagulation, intrinsic pathway, cell surface receptor signaling pathway, cellular protein metabolic process, cytolysis by host of symbiont cells, ER to Golgi vesicle-mediated transport, fibrinolysis, G protein-coupled receptor signaling pathway, multicellular organism developmen…	45.4984	34	69992.1	5.49951	-0.539228	6.16872e-12
P26927	MST1	6.7944	6.78456	6.49213	5.57506		6.49715	6.60496	5.45587	7.18418	7.22736	6.60854	5.17897	8.17175	8.0337	7.94356	5.74103	8.13282	7.99047	7.98175	7.46874	Hepatocyte growth factor-like protein	extracellular region, extracellular space	receptor tyrosine kinase binding, serine-type endopeptidase activity	hepatocyte growth factor receptor signaling pathway, negative regulation of gluconeogenesis, positive regulation of mammary gland epithelial cell proliferation, regulation of cAMP-dependent protein kinase activity, regulation of macrophage chemotaxis	71.73	61	80267.5	7.36572	-0.610689	6.80319e-12
P19827	ITIH1	8.1323	7.87405	7.75528	7.07285	6.86707	7.27673	7.01368	7.13691	7.59947	7.21025	6.68228	6.95095	7.57515	7.96366	7.84824	7.53891	8.75806	8.57857	8.58057	8.46022	Inter-alpha-trypsin inhibitor heavy chain H1	blood microparticle, collagen-containing extracellular matrix, extracellular exosome, extracellular region	calcium ion binding, serine-type endopeptidase inhibitor activity	hyaluronan metabolic process	47.3106	43	101326	6.30615	-0.281559	7.45325e-12
P02788	LTF	7.57098	7.46039	7.43803	6.31223	6.93314	7.14441	7.18514	6.68613	7.95195	7.77789	7.5736	6.70402	7.81109	7.70687	7.61701	6.46497	6.12782	5.96827			Lactotransferrin	cell surface, cytoplasm, extracellular exosome, extracellular region, extracellular space, nucleus, other organism cell membrane, phagocytic vesicle lumen, protein-containing complex, secretory granule, specific granule, specific granule lumen, tertiary granule lumen	cysteine-type endopeptidase inhibitor activity, DNA binding, heparin binding, iron ion binding, lipopolysaccharide binding, protein serine/threonine kinase activator activity, serine-type endopeptidase activity	antibacterial humoral response, antifungal humoral response, antimicrobial humoral immune response mediated by antimicrobial peptide, antimicrobial humoral response, bone morphogenesis, cellular protein metabolic process, defense response to Gram-negative bacterium, defense response to Gram-positive bacterium, humoral immune response, innate immune response, innate immune response in mucosa, kill…	59.5775	49	78131.9	7.87158	-0.337042	8.15364e-12
P02656	APOC3	9.62882	9.60223	9.60001	9.06467	8.91588	9.24493	9.22344	9.01599	8.89103	9.26147	8.23659	8.98516	9.06691	9.09682	9.04929	9.40981	8.89791	8.90167	8.78312	8.58546	Apolipoprotein C-III	chylomicron, collagen-containing extracellular matrix, early endosome, extracellular exosome, extracellular region, extracellular space, intermediate-density lipoprotein particle, spherical high-density lipoprotein particle, very-low-density lipoprotein particle	cholesterol binding, enzyme regulator activity, high-density lipoprotein particle receptor binding, lipase inhibitor activity, phospholipid binding	cholesterol efflux, cholesterol homeostasis, chylomicron assembly, chylomicron remnant clearance, chylomicron remodeling, G protein-coupled receptor signaling pathway, high-density lipoprotein particle remodeling, lipoprotein metabolic process, negative regulation of cholesterol import, negative regulation of fatty acid biosynthetic process, negative regulation of high-density lipoprotein particl…	58.5859	13	10845.5	4.98682	-0.0858586	8.9196e-12
Q14520	HABP2	7.16723	7.06362	7.05526	6.10636	5.81553	6.50316	6.55592	6.15193	7.24494	6.97233	6.20915	5.9998	7.58135	7.55382	7.48269	6.64461	7.699	7.55703	7.65518	7.37095	Hyaluronan-binding protein 2	extracellular region, extracellular space	calcium ion binding, glycosaminoglycan binding, serine-type endopeptidase activity	cell adhesion, proteolysis	36.25	20	62630.4	6.06689	-0.545	9.68732e-12
P01857	IGHG1	9.65976	9.45331	9.50126	8.67729	9.36516	9.54915	9.38751	8.84303	9.48281	9.45456	8.75102	8.50214	9.23697	9.81609	9.79846	8.98737	9.60657	9.55259	9.50093	9.02792	Immunoglobulin heavy constant gamma 1	blood microparticle, external side of plasma membrane, extracellular exosome, extracellular region, extracellular space, immunoglobulin complex, circulating	antigen binding, immunoglobulin receptor binding, serine-type endopeptidase activity	B cell receptor signaling pathway, complement activation, complement activation, classical pathway, cytokine-mediated signaling pathway, defense response to bacterium, Fc-gamma receptor signaling pathway involved in phagocytosis, innate immune response, phagocytosis, engulfment, phagocytosis, recognition, positive regulation of B cell activation, regulation of complement activation	54.8485	36	36083.2	8.05615	-0.428182	1.06754e-11
P01871	IGHM	9.66205	9.6464	9.66674	8.83949	9.4696	9.47789	9.45011	9.16472	9.46218	9.44796	9.02871	8.20338	9.34988	9.4199	9.2811	9.00115	9.25908	9.22547	9.04916	8.72689	Immunoglobulin heavy constant mu	blood microparticle, cell surface, external side of plasma membrane, extracellular exosome, extracellular space, hexameric IgM immunoglobulin complex, immunoglobulin complex, circulating, integral component of membrane, pentameric IgM immunoglobulin complex, plasma membrane	antigen binding, immunoglobulin receptor binding	adaptive immune response, antibacterial humoral response, B cell receptor signaling pathway, complement activation, classical pathway, defense response to bacterium, defense response to Gram-negative bacterium, innate immune response, leukocyte migration, phagocytosis, engulfment, phagocytosis, recognition, positive regulation of B cell activation	64.6799	59	49408.6	6.31982	-0.318543	1.16486e-11
P16157	ANK1	7.78178	7.74403	7.77119	7.17945	7.34421	7.32614	7.32486	7.45654	7.47165	7.38785	7.16407	6.67037	7.62231	7.71059	7.58197	7.47466	6.59143	6.50657	6.48565	6.26343	Ankyrin-1	axolemma, axon initial segment, basolateral plasma membrane, cytoplasmic side of plasma membrane, cytoskeleton, cytosol, M band, membrane, nucleus, plasma membrane, postsynaptic membrane, sarcolemma, sarcoplasmic reticulum, spectrin-associated cytoskeleton, Z disc	ATPase binding, cytoskeletal adaptor activity, enzyme binding, ion channel binding, protein phosphatase binding, spectrin binding, structural constituent of cytoskeleton, structural molecule activity	cytoskeleton organization, ER to Golgi vesicle-mediated transport, exocytosis, maintenance of epithelial cell apical/basal polarity, positive regulation of organelle organization, protein localization to plasma membrane, signal transduction	46.6241	78	206137	5.57471	-0.378416	1.26248e-11
P18206	VCL	7.55072	7.46924	7.60114	6.95166	7.38048	7.47184	7.51593	6.88281	7.31144	7.66752	6.72935	6.02041	8.12708	8.22045	7.91647	7.39398	7.20892	7.09211	6.77973	5.5352	Vinculin	adherens junction, brush border, cell, cell-cell adherens junction, cell-cell junction, cell-substrate junction, costamere, cytoskeleton, cytosol, extracellular exosome, extracellular region, extracellular vesicle, fascia adherens, ficolin-1-rich granule lumen, focal adhesion, inner dense plaque of desmosome, membrane raft, outer dense plaque of desmosome, plasma membrane, podosome, protein-conta…	actin binding, alpha-catenin binding, beta-catenin binding, cadherin binding, dystroglycan binding, structural molecule activity, ubiquitin protein ligase binding	adherens junction assembly, apical junction assembly, axon extension, cell adhesion, cell-matrix adhesion, epithelial cell-cell adhesion, lamellipodium assembly, morphogenesis of an epithelium, muscle contraction, negative regulation of cell migration, neutrophil degranulation, platelet aggregation, platelet degranulation, protein localization to cell surface	64.8148	76	123722	5.31494	-0.405467	1.36531e-11
P55072	VCP	6.78482	6.76645	7.01564	6.1221	6.74123	6.78462	6.81747	5.90295	6.68013	6.93155	6.1692	4.71844	7.47856	7.55579	7.33012	6.7799					Transitional endoplasmic reticulum ATPase	ATPase complex, azurophil granule lumen, cytoplasm, cytoplasmic stress granule, cytosol, Derlin-1 retrotranslocation complex, endoplasmic reticulum, endoplasmic reticulum membrane, extracellular exosome, extracellular region, ficolin-1-rich granule lumen, glutamatergic synapse, intracellular membrane-bounded organelle, lipid droplet, myelin sheath, nucleoplasm, nucleus, perinuclear region of cyto…	ADP binding, ATP binding, ATPase activity, BAT3 complex binding, deubiquitinase activator activity, identical protein binding, K48-linked polyubiquitin modification-dependent protein binding, lipid binding, MHC class I protein binding, polyubiquitin modification-dependent protein binding, protein domain specific binding, protein phosphatase binding, RNA binding, ubiquitin protein ligase binding, …	activation of cysteine-type endopeptidase activity involved in apoptotic process, aggresome assembly, ATP metabolic process, autophagosome maturation, autophagy, cellular response to arsenite ion, cellular response to DNA damage stimulus, cellular response to heat, DNA repair, double-strand break repair, endoplasmic reticulum stress-induced pre-emptive quality control, endoplasmic reticulum unfol…	35.2357	19	89265.7	4.89795	-0.347643	1.48503e-11
Q9HDC9	APMAP	6.70401	6.70508	6.30876	5.48009	6.29326	6.76525			6.10023		6.21463	5.28224	7.23109	7.43664	7.28487	7.12504	7.64376	7.54827	7.56934	7.51332	Adipocyte plasma membrane-associated protein	cell surface, endoplasmic reticulum, integral component of membrane, membrane	arylesterase activity, strictosidine synthase activity	biosynthetic process	29.5673	12	46450.8	5.71826	-0.186298	1.6133e-11
P01877	IGHA2	9.11573	9.02187	9.01239	8.19497	8.7456	8.85982	8.84861	8.45523	8.63949	8.94642	8.34053	7.82625	8.76001	9.07827	8.9258	8.47349	9.19291	9.25626	9.18648	8.84005	Immunoglobulin heavy constant alpha 2	blood microparticle, external side of plasma membrane, extracellular exosome, extracellular region, extracellular space, immunoglobulin complex, circulating, monomeric IgA immunoglobulin complex, secretory dimeric IgA immunoglobulin complex, secretory IgA immunoglobulin complex	antigen binding, immunoglobulin receptor binding	antibacterial humoral response, B cell receptor signaling pathway, complement activation, classical pathway, defense response to bacterium, glomerular filtration, immune response, innate immune response, leukocyte migration, phagocytosis, engulfment, phagocytosis, recognition, positive regulation of B cell activation, positive regulation of respiratory burst, receptor-mediated endocytosis, retina…	44.4118	30	36568	5.80713	-0.267647	1.75128e-11
Q14766	LTBP1	7.22458	7.26933	7.3498	6.67933	7.22884	7.39181	7.30555	6.70624	7.09221	7.49821	6.81171		7.87901	7.94561	7.77329	7.31395	6.06613	6.85697	6.54067	6.24314	Latent-transforming growth factor beta-binding protein 1	collagen-containing extracellular matrix, endoplasmic reticulum lumen, extracellular matrix, extracellular region, microfibril, protein-containing complex	calcium ion binding, extracellular matrix structural constituent, microfibril binding, transforming growth factor beta binding, transforming growth factor beta-activated receptor activity	aorta development, cellular protein metabolic process, coronary vasculature development, post-translational protein modification, regulation of transforming growth factor beta activation, sequestering of TGFbeta in extracellular matrix, ventricular septum development	37.8268	49	186673	5.53369	-0.493202	1.89238e-11
P27169	PON1	8.33832	8.30145	8.21511	7.6996	7.79153	8.01175	7.97059	7.75005	7.53054	7.97947	7.15658	7.34412	8.22414	8.39276	8.30993	8.39807	9.36521	9.30705	9.28344	9.11378	Serum paraoxonase/arylesterase 1	blood microparticle, extracellular exosome, extracellular region, extracellular space, high-density lipoprotein particle, intracellular membrane-bounded organelle, spherical high-density lipoprotein particle	acyl-L-homoserine-lactone lactonohydrolase activity, aryldialkylphosphatase activity, arylesterase activity, calcium ion binding, phospholipid binding, protein homodimerization activity	aromatic compound catabolic process, carboxylic acid catabolic process, cholesterol metabolic process, lipoxygenase pathway, organophosphate catabolic process, phosphatidylcholine metabolic process, positive regulation of binding, positive regulation of cholesterol efflux, positive regulation of transporter activity, response to fatty acid, response to fluoride, response to nutrient levels, respo…	74.3662	31	39706.2	4.88428	-0.0912676	2.03548e-11
Q96PD5	PGLYRP2	7.5836	7.39418	7.31896	6.59983	6.65227	6.9248	6.21628	6.33694	6.86273	6.98256	5.87087	6.4529	7.16103	7.72175	7.53693	6.92661	8.38825	8.26007	8.07717	7.71489	N-acetylmuramoyl-L-alanine amidase	extracellular exosome, extracellular region, extracellular space, intracellular, membrane	N-acetylmuramoyl-L-alanine amidase activity, peptidoglycan binding, peptidoglycan receptor activity, zinc ion binding	antimicrobial humoral response, defense response to Gram-positive bacterium, detection of bacterium, growth of symbiont in host, innate immune response, negative regulation of interferon-gamma production, negative regulation of natural killer cell differentiation involved in immune response, peptide amidation, peptidoglycan catabolic process, regulation of inflammatory response	37.5	18	62177.9	7.20166	-0.128993	2.20077e-11
P04003	C4BPA	8.66685	8.52286	8.49502	7.6553	7.94631	8.20624	8.01621	8.02609	8.21693	8.18417	7.83992	7.53323	8.2587	8.58923	8.34109	8.2883	8.37292	8.28406	8.22881	8.32932	C4b-binding protein alpha chain	blood microparticle, extracellular region, extracellular space, other organism cell, plasma membrane	RNA binding	complement activation, classical pathway, innate immune response, negative regulation of complement activation, classical pathway, positive regulation of protein catabolic process, regulation of complement activation, regulation of opsonization	67.3367	49	66989.4	6.92139	-0.476717	2.54975e-11
O00602	FCN1	8.02544	8.20843	8.27386		7.98902	7.73896	7.96664		7.90743	7.95147	7.088	5.37208	7.45139	7.8881	7.60562	6.78207					Ficolin-1	collagen trimer, collagen-containing extracellular matrix, extracellular region, extrinsic component of external side of plasma membrane, ficolin-1-rich granule lumen, secretory granule lumen	carbohydrate binding, G protein-coupled receptor binding, metal ion binding, serine-type endopeptidase activity, sialic acid binding, signaling pattern recognition receptor activity	cell surface pattern recognition receptor signaling pathway, complement activation, complement activation, lectin pathway, G protein-coupled receptor signaling pathway, negative regulation of viral entry into host cell, neutrophil degranulation, positive regulation of interleukin-8 secretion, protein localization to cell surface, recognition of apoptotic cell	40.184	13	35056.1	6.40186	-0.42454	2.73111e-11
P0C0L5	C4B	8.43434	8.295	8.44494	7.67795	8.0636	8.13692	8.12401	7.95366	7.77691	8.18504	7.60595	7.24186	8.37165	8.50484	8.41574	8.07938	8.48809	8.25539	8.35412	8.14096	Complement C4-B	axon, blood microparticle, cell junction, dendrite, extracellular exosome, extracellular region, extracellular space, other organism cell, plasma membrane, synapse	carbohydrate binding, complement binding, endopeptidase inhibitor activity, serine-type endopeptidase activity	complement activation, complement activation, classical pathway, detection of molecule of bacterial origin, inflammatory response, innate immune response, opsonization, positive regulation of apoptotic cell clearance, regulation of complement activation	4.47248	7	192631	6.83936	-0.253383	2.93488e-11
P43251	BTD										6.76393			6.5983	6.82614	6.76593	6.3865	8.25903	8.18027	8.16921	8.03576	Biotinidase	extracellular exosome, extracellular region, extracellular space, mitochondrial matrix	biotinidase activity	biotin metabolic process, central nervous system development	27.8085	11	61093.3	5.77979	-0.0316759	3.16783e-11
Q86UX7	FERMT3	7.43746	7.36143	7.43337	6.59328	7.13448	7.33795	7.23243	6.71071	7.31785	7.31543	6.9306	5.93939	7.88079	7.94131	7.85676	7.41423	7.34216	7.09443	7.05134	6.68424	Fermitin family homolog 3	cell junction, cell projection, extracellular exosome, extracellular region, membrane, platelet alpha granule lumen, podosome	integrin binding	integrin activation, integrin-mediated signaling pathway, leukocyte cell-cell adhesion, platelet aggregation, platelet degranulation, positive regulation of cell migration, regulation of cell-cell adhesion mediated by integrin, substrate adhesion-dependent cell spreading	58.6207	32	75905	6.5249	-0.383808	3.44238e-11
Q13418	ILK	7.40711	7.45514	7.66739	6.89726	7.40305	7.47871	7.45877	6.97699	7.19873	7.56975	6.96235	5.96794	8.14494	8.33118	8.1108	7.68277	7.0273	6.91759	6.76494	6.72447	Integrin-linked protein kinase	cell junction, cell-cell junction, costamere, cytosol, dendritic shaft, focal adhesion, lamellipodium, membrane, neuronal cell body, nucleoplasm, plasma membrane, protein-containing complex, sarcomere, stress fiber, terminal bouton	ATP binding, integrin binding, protein kinase binding, protein serine/threonine kinase activity, SH3 domain binding	branching involved in ureteric bud morphogenesis, cell aging, cell cycle arrest, cell junction assembly, cell proliferation, cell-matrix adhesion, establishment or maintenance of epithelial cell apical/basal polarity, fibroblast migration, integrin-mediated signaling pathway, MAPK cascade, myelin assembly, myelination in peripheral nervous system, negative regulation of cardiac muscle cell apopto…	58.6283	35	51385.9	7.89893	-0.411947	3.72775e-11
P08603	CFH	8.26597	8.13596	8.1134	7.48259	7.82889	8.02812	7.83874	7.51712	8.14938	7.84185	7.50513	7.16217	7.67396	8.23955	8.10332	7.49011	8.19217	8.0648	8.05779	8.07016	Complement factor H	blood microparticle, extracellular exosome, extracellular region, extracellular space	heparan sulfate proteoglycan binding, heparin binding	complement activation, complement activation, alternative pathway, regulation of complement activation, viral process	62.5508	87	139005	6.15576	-0.603006	4.01294e-11
O14791	APOL1	8.19429	8.1822	7.98585	7.11595	7.00031	7.53217	7.63284	7.29955	7.31424	7.57084	6.65684	6.73358	7.87843	7.74724	7.74014	7.90939	8.42864	8.4228	8.29636	8.0865	Apolipoprotein L1	blood microparticle, endoplasmic reticulum lumen, extracellular region, extracellular space, high-density lipoprotein particle, intrinsic component of membrane, very-low-density lipoprotein particle	chloride channel activity, lipid binding	cellular protein metabolic process, chloride transmembrane transport, cholesterol metabolic process, cytolysis, innate immune response, killing of cells of other organism, lipid transport, lipoprotein metabolic process, post-translational protein modification, receptor-mediated endocytosis	57.2864	29	43946.9	5.45166	-0.239196	4.29745e-11
Q96KN2	CNDP1	6.38607	6.25999											6.52661	6.99585	6.76565	6.79432	8.02074	7.91986	7.8801	7.77616	Beta-Ala-His dipeptidase	cytosol, extracellular region	carboxypeptidase activity, dipeptidase activity, metal ion binding, metallopeptidase activity	proteolysis, regulation of cellular protein metabolic process	51.0848	20	56670.1	4.92529	-0.0885602	4.62372e-11
Q15942	ZYX	7.02634	6.99246	7.07805	6.3713	7.12392	6.69503	6.63208	6.17744	6.98664	7.45946	5.65669		7.85945	7.92472	7.72823	7.07917					Zyxin	cell-cell adherens junction, cytosol, focal adhesion, nucleus, phagocytic vesicle, stress fiber	metal ion binding, RNA binding	cell-cell signaling, cell-matrix adhesion, cellular response to interferon-gamma, integrin-mediated signaling pathway, regulation of inflammatory response, stress fiber assembly, transforming growth factor beta receptor signaling pathway, viral process	45.6294	18	61238.2	6.20361	-0.63042	5.5222e-11
P04406	GAPDH	7.61819	7.65346	7.67035	7.06971	7.20555	7.28923	7.25206	7.15402	7.37495	7.4508	6.93284	6.9135	7.93633	8.01755	7.80973	7.74789	7.25677	7.22829	7.16143	6.99383	Glyceraldehyde-3-phosphate dehydrogenase	cytoplasm, cytosol, extracellular exosome, GAIT complex, intracellular membrane-bounded organelle, lipid droplet, membrane, microtubule cytoskeleton, nuclear membrane, nucleus, perinuclear region of cytoplasm, plasma membrane, ribonucleoprotein complex, vesicle	aspartic-type endopeptidase inhibitor activity, disordered domain specific binding, glyceraldehyde-3-phosphate dehydrogenase (NAD+) (phosphorylating) activity, identical protein binding, microtubule binding, NAD binding, NADP binding, peptidyl-cysteine S-nitrosylase activity	antimicrobial humoral immune response mediated by antimicrobial peptide, canonical glycolysis, cellular response to interferon-gamma, defense response to fungus, gluconeogenesis, glycolytic process, killing by host of symbiont cells, killing of cells of other organism, microtubule cytoskeleton organization, negative regulation of endopeptidase activity, negative regulation of translation, neuron …	70.1493	24	36030.4	8.65771	-0.107761	6.07101e-11
P49747	COMP																	7.20014	7.01759	7.03399	6.88244	Cartilage oligomeric matrix protein	extracellular exosome, extracellular matrix, extracellular region, extracellular space, protein-containing complex	BMP binding, calcium ion binding, collagen binding, extracellular matrix structural constituent, heparan sulfate proteoglycan binding, heparin binding, integrin binding, protease binding, proteoglycan binding	animal organ morphogenesis, animal organ senescence, apoptotic process, artery morphogenesis, BMP signaling pathway, bone mineralization, chondrocyte development, chondrocyte proliferation, collagen fibril organization, extracellular matrix organization, growth plate cartilage development, limb development, multicellular organism aging, multicellular organism growth, muscle fiber development, mus…	35.2708	13	82807.6	4.01611	-0.730251	6.61861e-11
Q9UHG3	PCYOX1	7.1491	7.10284	6.93793	6.29989	5.88903	6.35514	6.41323	6.45674	6.34816	6.64861	6.20351	5.76222	6.85295	7.18922	7.03309	7.31031	7.90638	7.84054	7.79667	7.64699	Prenylcysteine oxidase 1	extracellular exosome, lysosome, plasma membrane, very-low-density lipoprotein particle	chloride-transporting ATPase activity, prenylcysteine oxidase activity	prenylated protein catabolic process, prenylcysteine catabolic process, prenylcysteine metabolic process	42.1782	20	56603.7	5.73193	-0.0607921	7.27652e-11
P04196	HRG	9.06672	9.03337	9.05241	7.42287	8.67804	8.65191	8.69845	7.38209	8.76668	8.76873	8.25271	7.02709	8.76772	8.78485	8.67308	7.2932	8.38434	8.28234	8.37054	7.63753	Histidine-rich glycoprotein	blood microparticle, cell surface, collagen-containing extracellular matrix, endolysosome, extracellular exosome, extracellular region, plasma membrane, platelet alpha granule lumen	cysteine-type endopeptidase inhibitor activity, heme binding, heparan sulfate proteoglycan binding, heparin binding, immunoglobulin binding, metal ion binding, serine-type endopeptidase inhibitor activity, signaling receptor binding, zinc ion binding	angiogenesis, antimicrobial humoral immune response mediated by antimicrobial peptide, chemotaxis, cytolysis in other organism, defense response to fungus, fibrinolysis, heme transport, negative regulation of angiogenesis, negative regulation of blood vessel endothelial cell migration, negative regulation of cell adhesion, negative regulation of cell adhesion mediated by integrin, negative regula…	65.7143	52	59540.9	7.07178	-0.956762	7.92841e-11
P05062	ALDOB	6.61339	6.59158	6.11582						7.34376	7.46775	6.61749	5.19415	8.0014	8.0038	7.89382	7.04305	8.08938	8.04094	7.99043	7.89463	Fructose-bisphosphate aldolase B	centriolar satellite, cytosol, extracellular exosome, microtubule organizing center	ATPase binding, cytoskeletal protein binding, fructose binding, fructose-1-phosphate aldolase activity, fructose-bisphosphate aldolase activity, identical protein binding	canonical glycolysis, fructose 1,6-bisphosphate metabolic process, fructose catabolic process to hydroxyacetone phosphate and glyceraldehyde-3-phosphate, fructose metabolic process, gluconeogenesis, glycolytic process, NADH oxidation, positive regulation of ATPase activity, vacuolar proton-transporting V-type ATPase complex assembly	59.3407	19	39448.1	7.6665	-0.226648	8.60036e-11
P20742	PZP	6.33702	6.02035		5.61451				5.6056	5.84364				5.99225		5.81036	6.09119	7.63274	7.50404	7.49332	7.43443	Pregnancy zone protein	blood microparticle, extracellular exosome, extracellular region	endopeptidase inhibitor activity, serine-type endopeptidase inhibitor activity	female pregnancy	23.1444	29	163760	5.92334	-0.0939271	9.30373e-11
Q13642	FHL1	6.83864	6.83663	6.92355	6.1848	6.4924	6.95113	6.92386	5.8767	7.16981	7.04433	6.53133		7.56723	7.62729	7.38608	6.64128	6.60133				Four and a half LIM domains protein 1	cytoplasm, cytosol, focal adhesion, nucleus, plasma membrane	ion channel binding, metal ion binding	animal organ morphogenesis, cell differentiation, muscle organ development, negative regulation of cell growth, negative regulation of G1/S transition of mitotic cell cycle, negative regulation of G2/M transition of mitotic cell cycle, positive regulation of potassium ion transport, regulation of membrane depolarization, regulation of potassium ion transmembrane transporter activity	45.2012	14	36238.6	8.92432	-0.511455	1.00144e-10
Q9UGM5	FETUB	6.84563	6.71798	6.50557	6.0982		5.00701			6.44628			5.59733	5.90314	7.00936	6.51943	6.10092	7.35487	7.12126	7.07585	7.17772	Fetuin-B	extracellular exosome, extracellular region	cysteine-type endopeptidase inhibitor activity, metalloendopeptidase inhibitor activity	binding of sperm to zona pellucida, negative regulation of endopeptidase activity, single fertilization	29.8429	9	42028	6.42236	-0.317016	1.0748e-10
P07225	PROS1	7.82161	7.71545	7.55386	6.79002	6.81033	7.26669	6.98866	7.0211	7.35732	7.27716	6.70565	6.76103	7.30226	7.55678	7.43677	7.25728	7.93894	7.91023	7.72949	7.75491	Vitamin K-dependent protein S	blood microparticle, endoplasmic reticulum membrane, extracellular exosome, extracellular region, extracellular space, Golgi lumen, Golgi membrane, plasma membrane, platelet alpha granule lumen	calcium ion binding, endopeptidase inhibitor activity	blood coagulation, ER to Golgi vesicle-mediated transport, fibrinolysis, leukocyte migration, platelet degranulation, regulation of complement activation	43.3432	31	75073.9	5.30811	-0.29497	1.23214e-10
Q93084	ATP2A3	7.14355	7.09093	7.23946	6.87446	7.20688	7.28315	7.27343	6.87051	6.95875	7.49094	6.37927	5.52293	7.78794	8.06657	7.85965	7.39905		6.26521			Sarcoplasmic/endoplasmic reticulum calcium ATPase 3	endoplasmic reticulum, endoplasmic reticulum membrane, integral component of membrane, nuclear membrane, platelet dense tubular network membrane, sarcoplasmic reticulum, sarcoplasmic reticulum membrane	ATP binding, calcium-transporting ATPase activity, metal ion binding, proton-exporting ATPase activity, phosphorylative mechanism	calcium ion transmembrane transport, calcium ion transport, cellular calcium ion homeostasis, ion transmembrane transport, regulation of cardiac conduction	32.6942	34	113904	5.23291	0.0770853	1.3202e-10
P01042	KNG1	10.1084	10.0479	10.1709	8.08507	9.64532	9.67685	9.63639	7.94311	9.97527	9.73745	9.45711	7.61692	9.07418	9.09243	9.12202	7.79991	8.48488	8.36461	8.44618	8.02383	Kininogen-1	blood microparticle, collagen-containing extracellular matrix, endoplasmic reticulum lumen, extracellular exosome, extracellular region, extracellular space, plasma membrane, platelet alpha granule lumen	cysteine-type endopeptidase inhibitor activity, heparin binding, signaling receptor binding, zinc ion binding	antimicrobial humoral immune response mediated by antimicrobial peptide, blood coagulation, intrinsic pathway, cellular protein metabolic process, G protein-coupled receptor signaling pathway, inflammatory response, killing of cells of other organism, negative regulation of blood coagulation, negative regulation of cell adhesion, negative regulation of endopeptidase activity, negative regulation …	54.5031	95	71912.1	6.3335	-0.757298	1.41459e-10
P04217	A1BG	7.99503	7.78464	7.7373	6.85957	7.2647	7.41939	7.24249	6.90394	7.55605	7.36064	7.01066	6.96763	7.26843	7.91221	7.85347	7.11199	8.25326	8.23122	8.22138	8.38298	Alpha-1B-glycoprotein	blood microparticle, collagen-containing extracellular matrix, extracellular exosome, extracellular region, extracellular space, ficolin-1-rich granule lumen, platelet alpha granule lumen, secretory granule lumen		neutrophil degranulation, platelet degranulation	53.1313	24	54219.5	5.4585	-0.216566	1.62276e-10
Q02413	DSG1	7.14102	6.62183	7.08988	6.95917	6.54796	6.42591		6.95272	6.46924	6.38674	6.0562	7.0101	7.13441	7.1717	6.98932	7.65822					Desmoglein-1	apical plasma membrane, cornified envelope, cytoplasmic side of plasma membrane, cytosol, desmosome, ficolin-1-rich granule membrane, integral component of membrane, lateral plasma membrane, plasma membrane	calcium ion binding, gamma-catenin binding, toxic substance binding	calcium-dependent cell-cell adhesion via plasma membrane cell adhesion molecules, cell-cell adhesion, cell-cell junction assembly, cornification, homophilic cell adhesion via plasma membrane adhesion molecules, keratinization, maternal process involved in female pregnancy, neutrophil degranulation, protein stabilization, response to progesterone	32.6978	27	113676	4.65869	-0.277312	1.73155e-10
P02753	RBP4	7.70907	7.39956	7.34683	6.45329	6.26952	6.98084	6.55865	5.92648	7.0044	6.74087	6.17847	6.62024	6.82921	7.76153	7.61025	6.72183	6.23054	6.24503	6.47738	6.33148	Retinol-binding protein 4	cytosol, extracellular exosome, extracellular region, extracellular space, protein-containing complex	protein heterodimerization activity, retinal binding, retinol binding, retinol transmembrane transporter activity	cardiac muscle tissue development, embryonic organ morphogenesis, embryonic retina morphogenesis in camera-type eye, embryonic skeletal system development, eye development, female genitalia morphogenesis, gluconeogenesis, glucose homeostasis, heart development, heart trabecula formation, lung development, maintenance of gastrointestinal epithelium, negative regulation of cardiac muscle cell proli…	74.6269	11	22995.3	5.61572	-0.433333	1.84439e-10
P12814	ACTN1	7.75892	7.7909	7.92665	7.24225	7.83464	7.82431	7.8185	7.24946	7.5588	8.00726	6.86757	6.03855	8.33941	8.48018	8.27036	7.68321	7.28606	7.25991	7.05314	7.01878	Alpha-actinin-1	brush border, cell projection, cell-cell junction, cytoplasm, cytosol, extracellular exosome, extracellular region, extracellular space, fascia adherens, focal adhesion, glutamatergic synapse, intracellular, plasma membrane, platelet alpha granule lumen, pseudopodium, ruffle, stress fiber, Z disc	actin filament binding, calcium ion binding, double-stranded RNA binding, integrin binding, ion channel binding, nuclear receptor transcription coactivator activity, protein homodimerization activity, structural constituent of postsynapse, vinculin binding	actin crosslink formation, actin filament bundle assembly, actin filament network formation, actin filament organization, focal adhesion assembly, negative regulation of cellular component movement, platelet degranulation, platelet formation, platelet morphogenesis, regulation of apoptotic process	55.0448	52	102993	5.05518	-0.598543	1.95764e-10
P02748	C9	7.9462	7.74139	7.61567	6.56875	7.23096	7.48315	7.38824	6.971	7.42187	7.40953	6.54767	6.53876	7.58533	7.85847	7.79457	7.4499	8.85736	8.72474	8.71418	8.59514	Complement component C9	blood microparticle, cytosol, extracellular exosome, extracellular region, extracellular space, integral component of plasma membrane, membrane attack complex, other organism cell membrane, plasma membrane		cell killing, complement activation, alternative pathway, complement activation, classical pathway, hemolysis by symbiont of host erythrocytes, protein homooligomerization, regulation of complement activation	52.415	38	63132.7	5.23975	-0.450447	2.07335e-10
P07996	THBS1	7.80798	7.77059	7.97338	7.48444	7.85753	7.97953	7.95595	7.42708	7.39616	8.24784	7.16171	6.59696	8.62071	8.59103	8.3741	8.1109	7.43694	7.3894	7.33006	7.22386	Thrombospondin-1	cell surface, collagen-containing extracellular matrix, endoplasmic reticulum, endoplasmic reticulum lumen, external side of plasma membrane, extracellular exosome, extracellular matrix, extracellular region, extracellular space, fibrinogen complex, platelet alpha granule, platelet alpha granule lumen, sarcoplasmic reticulum, secretory granule	calcium ion binding, collagen V binding, extracellular matrix structural constituent, fibrinogen binding, fibroblast growth factor binding, fibronectin binding, heparin binding, identical protein binding, integrin binding, laminin binding, low-density lipoprotein particle binding, phosphatidylserine binding, proteoglycan binding, transforming growth factor beta binding	activation of MAPK activity, behavioral response to pain, cell adhesion, cell cycle arrest, cell migration, cellular response to growth factor stimulus, cellular response to heat, cellular response to tumor necrosis factor, chronic inflammatory response, engulfment of apoptotic cell, extracellular matrix organization, immune response, inflammatory response, negative regulation of angiogenesis, ne…	50.0855	86	129300	4.40576	-0.718889	2.36539e-10
P02746	C1QB	8.41805	8.33362	8.29291	7.36889	7.72924	8.12663	7.92849	7.77621	7.87179	7.80401	7.67017	6.86336	8.0651	8.3863	8.07865	7.43621	9.12988	9.10866	9.01462	8.62898	Complement C1q subcomponent subunit B	blood microparticle, collagen trimer, collagen-containing extracellular matrix, complement component C1 complex, extracellular region	protein homodimerization activity, serine-type endopeptidase activity	complement activation, complement activation, classical pathway, innate immune response, inner ear development, regulation of complement activation	46.6403	15	26704.5	8.80811	-0.256917	2.54784e-10
Q16610	ECM1	7.44313	7.31443	7.70188	6.89098	7.90449	8.02772	8.01568	7.22716	6.92389	7.63786	6.70479	6.02585	7.11145	7.60351	7.4158	6.73334	7.10481	7.0722	7.05854	6.85989	Extracellular matrix protein 1	collagen-containing extracellular matrix, extracellular exosome, extracellular matrix, extracellular region, platelet dense granule lumen	enzyme binding, extracellular matrix structural constituent, interleukin-2 receptor binding, laminin binding, protease binding, protein C-terminus binding	angiogenesis, biomineral tissue development, chondrocyte development, endochondral bone growth, inflammatory response, negative regulation of bone mineralization, negative regulation of cytokine-mediated signaling pathway, negative regulation of peptidase activity, ossification, platelet degranulation, positive regulation of angiogenesis, positive regulation of endothelial cell proliferation, pos…	70.3704	28	60635.3	6.23096	-0.744074	2.73435e-10
P02766	TTR	8.32744	8.25284	8.18223	7.29109	7.5929	7.72785	7.79031	7.3566	7.9597	7.74725	6.45839	6.99096	8.03291	8.19434	8.14433	7.91151	8.24712	8.31441	8.28978	8.1661	Transthyretin	azurophil granule lumen, extracellular exosome, extracellular region, extracellular space, protein-containing complex	hormone activity, identical protein binding, protein heterodimerization activity, thyroid hormone binding	cellular protein metabolic process, extracellular matrix organization, neutrophil degranulation, retinoid metabolic process, retinol metabolic process, thyroid hormone transport	77.551	13	15877	5.3833	-0.0285714	2.9187e-10
Q9BQE3	TUBA1C	7.00398	7.31644	7.58796	6.7135	7.21746	7.24727	7.28031	6.71713	7.14728	7.58887			7.957	8.04408	7.9263	7.50186					Tubulin alpha-1C chain	cytoplasm, microtubule, microtubule cytoskeleton, nucleus, vesicle	GTP binding, GTPase activity, structural constituent of cytoskeleton, structural molecule activity	cell division, cytoskeleton-dependent intracellular transport, microtubule cytoskeleton organization, microtubule-based process, mitotic cell cycle	12.2494	7	49863.5	4.73389	-0.23363	3.10278e-10
P61626	LYZ	7.03714	6.82813	7.19722	6.92901	6.14923	6.758	6.82672	7.16273	7.13425	6.42604	6.28021	7.09595	6.82569	7.0075	7.0012	7.13379	6.1024	6.21705	6.43829	6.14634	Lysozyme C	azurophil granule lumen, extracellular exosome, extracellular region, extracellular space, specific granule lumen, tertiary granule lumen	identical protein binding, lysozyme activity	antimicrobial humoral response, cellular protein metabolic process, cytolysis, defense response to bacterium, defense response to Gram-negative bacterium, defense response to Gram-positive bacterium, inflammatory response, killing of cells of other organism, neutrophil degranulation, retina homeostasis	62.8378	10	16526.3	9.31396	-0.194595	3.29292e-10
O95445	APOM	8.18019	8.19086	8.05035	7.4562	7.54029	7.79037	7.76317	7.41445	7.54375	7.94309	7.16015	6.92954	7.8152	8.10536	8.12134	8.32367	8.34794	8.40314	8.35308	8.21002	Apolipoprotein M	discoidal high-density lipoprotein particle, extracellular region, high-density lipoprotein particle, low-density lipoprotein particle, spherical high-density lipoprotein particle, very-low-density lipoprotein particle	antioxidant activity, lipid transporter activity, phospholipid binding	cholesterol efflux, cholesterol homeostasis, high-density lipoprotein particle assembly, high-density lipoprotein particle clearance, high-density lipoprotein particle remodeling, lipoprotein metabolic process, negative regulation of plasma lipoprotein oxidation, response to glucose, retinoid metabolic process, reverse cholesterol transport	78.1915	17	21239.4	5.58838	-0.258511	3.48663e-10
P06732	CKM	6.59721	6.83708	6.81035	5.91396	6.49455	6.988	6.84656	5.61051	6.65587	6.80389	6.27641		7.59076	7.46868	7.38305	7.04639	7.89494	7.80776	7.82569	7.81106	Creatine kinase M-type	cytosol, extracellular space	ATP binding, creatine kinase activity	creatine metabolic process, phosphocreatine biosynthetic process	56.6929	21	43073.9	6.82568	-0.589764	4.06916e-10
P48059	LIMS1	7.38514	7.30376	7.41656	6.69291	7.29305	7.37999	7.43782	6.74829	7.26548	7.60893	6.80159	5.23692	7.98914	8.08014	7.93475	7.44403	6.54951	6.734	6.32121	5.7911	LIM and senescent cell antigen-like-containing domain protein 1	cell-cell junction, cytosol, focal adhesion, perinuclear region of cytoplasm, plasma membrane, protein-containing complex	protein kinase binding, zinc ion binding	cell aging, cell junction assembly, cellular response to transforming growth factor beta stimulus, establishment of protein localization, negative regulation of transcription, DNA-templated, positive regulation of cell-substrate adhesion, positive regulation of focal adhesion assembly, positive regulation of gene expression, positive regulation of GTPase activity, positive regulation of NIK/NF-ka…	81.8462	29	37225.8	7.76221	-0.343385	4.29501e-10
P02749	APOH	8.67244	8.60161	8.53077	7.78467	8.19046	8.60409	8.2392	8.04721	8.6983	8.33472	7.97648	7.6502	8.22127	8.62344	8.48958	7.85546	7.55348	7.454	7.46244	7.2133	Beta-2-glycoprotein 1	cell surface, chylomicron, collagen-containing extracellular matrix, extracellular exosome, extracellular region, extracellular space, high-density lipoprotein particle, platelet dense granule lumen, very-low-density lipoprotein particle	heparin binding, identical protein binding, lipid binding, lipoprotein lipase activator activity, phospholipid binding	blood coagulation, intrinsic pathway, negative regulation of angiogenesis, negative regulation of blood coagulation, negative regulation of endothelial cell migration, negative regulation of endothelial cell proliferation, negative regulation of fibrinolysis, negative regulation of myeloid cell apoptotic process, negative regulation of smooth muscle cell apoptotic process, plasminogen activation,…	65.2174	21	38272.7	7.72803	-0.273623	4.54337e-10
P10809	HSPD1	7.04618	6.98104	7.1634	6.62143	7.00316	7.03402	7.11599	6.58346	6.99325	7.2472	6.65546	6.10715	7.64636	7.70056	7.43531	7.15701	5.62521				60 kDa heat shock protein, mitochondrial	cell surface, clathrin-coated pit, coated vesicle, cytoplasm, cytosol, early endosome, extracellular exosome, extracellular space, Golgi apparatus, lipopolysaccharide receptor complex, membrane, membrane raft, mitochondrial crista, mitochondrial inner membrane, mitochondrial matrix, mitochondrion, myelin sheath, peroxisomal matrix, plasma membrane, protein-containing complex, rough endoplasmic re…	apolipoprotein A-I binding, apolipoprotein binding, ATP binding, ATPase activity, chaperone binding, DNA replication origin binding, double-stranded RNA binding, enzyme binding, high-density lipoprotein particle binding, insulin binding, lipopolysaccharide binding, modification-dependent protein binding, p53 binding, protease binding, protein heterodimerization activity, RNA binding, single-stran…	'de novo' protein folding, activation of cysteine-type endopeptidase activity involved in apoptotic process, apoptotic mitochondrial changes, B cell activation, B cell cytokine production, B cell proliferation, cellular response to heat, chaperone-mediated protein complex assembly, interaction with symbiont, isotype switching to IgG isotypes, mitochondrion organization, MyD88-dependent toll-like …	57.4171	27	61016.4	5.51318	-0.0764398	4.80542e-10
P02747	C1QC	8.29286	8.22693	8.10147	7.3157	7.6121	7.99397	7.79837	7.76867	7.75704	7.73184	7.60437	6.83219	7.82882	7.89114	7.74506	7.30364	9.01338	8.95489	8.89226	8.61315	Complement C1q subcomponent subunit C	blood microparticle, collagen trimer, collagen-containing extracellular matrix, extracellular region, extracellular space	serine-type endopeptidase activity	complement activation, complement activation, classical pathway, immune response, innate immune response, negative regulation of granulocyte differentiation, negative regulation of macrophage differentiation, regulation of complement activation	38.7755	8	25757.1	8.45947	-0.186122	5.07545e-10
P05154	SERPINA5	7.85642	7.96898	7.88508		6.9291	7.06031	7.12021		7.20637	6.67068	6.48249		6.60578		6.48866						Plasma serine protease inhibitor	acrosomal membrane, external side of plasma membrane, extracellular exosome, extracellular region, extracellular space, membrane, platelet alpha granule, platelet dense tubular network, protein C inhibitor-coagulation factor V complex, protein C inhibitor-coagulation factor Xa complex, protein C inhibitor-coagulation factor XI complex, protein C inhibitor-KLK3 complex, protein C inhibitor-plasma …	acrosin binding, glycosaminoglycan binding, heparin binding, phosphatidylcholine binding, protease binding, retinoic acid binding, serine-type endopeptidase inhibitor activity	blood coagulation, fusion of sperm to egg plasma membrane involved in single fertilization, lipid transport, negative regulation of endopeptidase activity, negative regulation of hydrolase activity, seminal vesicle development, spermatogenesis	41.6256	17	45645.7	9.64893	-0.115271	5.37924e-10
P61769	B2M	7.71499	7.7261	7.81032	6.75378	7.1721	7.46531	7.44258	6.77728	7.26304	7.53036	6.76957	5.9711	7.91787	7.67468	7.41082	7.29009	7.17518	6.92513	6.84216	6.55128	Beta-2-microglobulin	cytosol, early endosome lumen, early endosome membrane, endoplasmic reticulum lumen, ER to Golgi transport vesicle membrane, external side of plasma membrane, extracellular exosome, extracellular region, extracellular space, focal adhesion, Golgi apparatus, Golgi membrane, HFE-transferrin receptor complex, membrane, MHC class I protein complex, phagocytic vesicle membrane, plasma membrane, recycl…	identical protein binding	antibacterial humoral response, antigen processing and presentation of endogenous peptide antigen via MHC class I, antigen processing and presentation of exogenous peptide antigen via MHC class I, TAP-dependent, antigen processing and presentation of exogenous peptide antigen via MHC class I, TAP-independent, antigen processing and presentation of exogenous protein antigen via MHC class Ib, TAP-d…	57.1429	7	13705.9	6.06689	-0.376471	5.69271e-10
P62937	PPIA	6.73929	6.74834	6.3545	6.29218	6.64871	6.74282	6.85627	6.10513	6.8736	6.88057	6.15826	6.03472	7.36158	7.41252	7.16473	6.82965	7.12105	7.09757	6.82862	6.7474	Peptidyl-prolyl cis-trans isomerase A	cytosol, extracellular exosome, extracellular region, extracellular space, ficolin-1-rich granule lumen, focal adhesion, membrane, mitochondrion, nucleus, protein-containing complex, secretory granule lumen, vesicle	cyclosporin A binding, peptidyl-prolyl cis-trans isomerase activity, RNA binding, unfolded protein binding, virion binding	entry into host cell, establishment of integrated proviral latency, fusion of virus membrane with host plasma membrane, interleukin-12-mediated signaling pathway, leukocyte migration, lipid droplet organization, neutrophil degranulation, positive regulation of protein secretion, positive regulation of viral genome replication, protein folding, protein peptidyl-prolyl isomerization, regulation of …	58.1818	8	18000.9	7.72119	-0.316364	6.00314e-10
P02649	APOE	9.09346	9.04951	9.01779	8.27406	8.51779	8.69883	8.74046	8.46867	8.87399	9.07258	8.33394	7.64195	9.48025	9.57305	9.38304	9.13495	9.41171	9.36691	9.42422	9.29238	Apolipoprotein E	blood microparticle, chylomicron, clathrin-coated endocytic vesicle membrane, collagen-containing extracellular matrix, cytoplasm, dendrite, discoidal high-density lipoprotein particle, early endosome, endocytic vesicle lumen, endoplasmic reticulum, endoplasmic reticulum lumen, extracellular exosome, extracellular region, extracellular space, extracellular vesicle, glutamatergic synapse, Golgi ap…	amyloid-beta binding, antioxidant activity, cholesterol binding, cholesterol transporter activity, heparin binding, identical protein binding, lipid binding, lipid transporter activity, lipoprotein particle binding, low-density lipoprotein particle receptor binding, metal chelating activity, phosphatidylcholine-sterol O-acyltransferase activator activity, phospholipid binding, protein dimerizatio…	AMPA glutamate receptor clustering, amyloid precursor protein metabolic process, artery morphogenesis, cellular calcium ion homeostasis, cellular protein metabolic process, cGMP-mediated signaling, cholesterol biosynthetic process, cholesterol catabolic process, cholesterol efflux, cholesterol homeostasis, cholesterol metabolic process, chylomicron assembly, chylomicron remnant clearance, chylomi…	86.7508	126	36131.8	5.46533	-0.595899	6.32178e-10
Q15485	FCN2	8.36171	8.29834	8.33639	5.83542	7.48466	7.65088	7.50458	5.21498	7.31482	7.1764	6.50505		6.95648	6.73823	6.62638		7.49368	7.39841	7.46617	7.40792	Ficolin-2	blood microparticle, collagen trimer, extracellular exosome, extracellular region	antigen binding, calcium-dependent protein binding, mannan binding, metal ion binding, proteoglycan binding, serine-type endopeptidase activity	complement activation, complement activation, lectin pathway, defense response to Gram-negative bacterium, defense response to Gram-positive bacterium, opsonization, recognition of apoptotic cell	26.1981	9	33979.5	6.31299	-0.465815	6.67524e-10
P05452	CLEC3B	6.83014	7.07063	6.71713	5.8141				6.12673	6.84114			6.00966	6.31062	6.90496	6.76806	6.13745	7.42257	7.72021	7.58536	7.51159	Tetranectin	collagen-containing extracellular matrix, cytoplasm, extracellular exosome, extracellular region, extracellular space, granular component, platelet dense granule lumen	calcium ion binding, carbohydrate binding, heparin binding, kringle domain binding	bone mineralization, cellular response to organic substance, cellular response to transforming growth factor beta stimulus, ossification, platelet degranulation, positive regulation of plasminogen activation	28.2178	5	22522.3	5.34229	-0.298515	7.03165e-10
P02760	AMBP	7.95013	7.76215	7.57194	6.81126	7.304	7.39997	7.15893	6.79806	7.51764	7.50864	6.78106	6.74926	7.46589	8.0162	7.89601	7.47029	8.47213	8.51149	8.489	8.38914	Protein AMBP	blood microparticle, cell surface, collagen-containing extracellular matrix, extracellular exosome, extracellular region, extracellular space, intracellular membrane-bounded organelle, plasma membrane	calcium channel inhibitor activity, calcium oxalate binding, heme binding, IgA binding, protein homodimerization activity, serine-type endopeptidase inhibitor activity	cell adhesion, female pregnancy, heme catabolic process, negative regulation of immune response, negative regulation of JNK cascade, protein catabolic process, protein-chromophore linkage, receptor-mediated endocytosis, viral process	49.4318	19	38974	5.85498	-0.298864	7.39244e-10
[truncated: 395 more rows]
