# Supplementary material for: Protein corona formed on silver nanoparticles in blood plasma is highly selective and resistant to physicochemical changes of the solution
Source: Environ Sci Nano. 2019 Mar 18;6(4):1089–98. doi: 10.1039/c8en01054d (PMC6592156; doi:10.1039/c8en01054d)
Supplement: Supplementary file 3 [file EN-006-C8EN01054D-s003.xlsx]

## Sheet: Lessening
Kyoto AAindex ID	Difference(pH)	Lessening(pH)	p-value(pH)	FDR(pH)	Difference(Temp)	Lessening(Temp)	p-value(Temp)	FDR(Temp)	Class	Description
ANDN920101	0.085064	1.00589	0.774869	0.841375	0.114252	1.06689	0.260778	0.361753	Physicochemical properties	alpha-CH chemical shifts (Andersen et al., 1992)
ARGP820101	0.00286301	0.7459	0.00146632	0.00675999	0.0117921	0.706525	0.000104939	0.00109782	Hydrophobicity	Hydrophobicity index (Argos et al., 1982)
ARGP820102	-0.0324445	0.956982	0.75262	0.825454	-0.0633545	0.907656	0.335326	0.435367	Hydrophobicity	Signal sequence helical potential (Argos et al., 1982)
ARGP820103	-0.0281316	1.037	0.535379	0.63177	-0.0724489	0.995303	0.905622	0.92605	Hydrophobicity	Membrane-buried preference parameters (Argos et al., 1982)
BEGF750101	0.00835421	1.35377	1.7497e-06	0.000118979	-0.0710182	1.27593	6.96073e-05	0.000881884	Alpha and turn propensities	Conformational parameter of inner helix (Beghin-Dirkx, 1975)
BEGF750102	0.0230088	0.81379	0.016736	0.0397572	-0.0038545	0.815145	0.0141777	0.036553	Hydrophobicity	Conformational parameter of beta-structure (Beghin-Dirkx, 1975)
BEGF750103	0.0125001	1.20728	0.00190403	0.00778791	0.118499	1.1574	0.0113655	0.0307212	Alpha and turn propensities	Conformational parameter of beta-turn (Beghin-Dirkx, 1975)
BHAR880101	-0.0973151	0.740675	0.00185199	0.00769069	-0.0576501	0.757949	0.00272084	0.010069	Hydrophobicity	Average flexibility indices (Bhaskaran-Ponnuswamy, 1988)
BIGC670101	-0.0143057	0.843767	0.0270964	0.0582625	-0.0185111	0.855029	0.0331305	0.0702435	Physicochemical properties	Residue volume (Bigelow, 1967)
BIOV880101	0.0589687	0.713926	0.000381411	0.0025936	0.0576038	0.700016	9.03616e-05	0.000998791	Hydrophobicity	Information value for accessibility; average fraction 35% (Biou et al., 1988)
BIOV880102	0.0475062	0.672057	0.00014297	0.00158726	0.036718	0.652582	2.20422e-05	0.00046954	Hydrophobicity	Information value for accessibility; average fraction 23% (Biou et al., 1988)
BROC820101	-0.0161703	1.12751	0.0604849	0.1058	-0.0625713	1.09254	0.145066	0.226675	Hydrophobicity	Retention coefficient in TFA (Browne et al., 1982)
BROC820102	-0.0576145	1.12866	0.0568888	0.100806	-0.100431	1.14583	0.0252018	0.0576041	Hydrophobicity	Retention coefficient in HFBA (Browne et al., 1982)
BULH740101	-0.0225012	0.882467	0.198271	0.283841	-0.0146569	0.848599	0.0697737	0.127801	Hydrophobicity	Transfer free energy to surface (Bull-Breese, 1974)
BULH740102	-0.0572896	0.957955	0.658402	0.744638	-0.0734542	0.971374	0.798998	0.852029	Physicochemical properties	Apparent partial specific volume (Bull-Breese, 1974)
BUNA790101	0.0547934	0.894043	0.256025	0.354396	0.0622704	0.879778	0.155372	0.237422	Alpha and turn propensities	alpha-NH chemical shifts (Bundi-Wuthrich, 1979)
BUNA790102	0.116026	0.905066	0.265889	0.363426	0.109596	1.03152	0.553913	0.643864	Physicochemical properties	alpha-CH chemical shifts (Bundi-Wuthrich, 1979)
BUNA790103	0.050789	0.853589	0.117693	0.187757	0.0673988	0.842577	0.0731134	0.132138	Alpha and turn propensities	Spin-spin coupling constants 3JHalpha-NH (Bundi-Wuthrich, 1979)
BURA740101	-0.0391647	1.31452	1.82659e-05	0.00044961	-0.0716668	1.13982	0.0296644	0.0655993	Alpha and turn propensities	Normalized frequency of alpha-helix (Burgess et al., 1974)
BURA740102	0.0837569	0.987846	0.943131	0.962889	0.075715	0.951593	0.651265	0.724515	Beta propensity	Normalized frequency of extended structure (Burgess et al., 1974)
CHAM810101	-0.00130639	0.918697	0.411613	0.510063	-0.0501738	0.882267	0.194046	0.280002	Other properties	Steric parameter (Charton, 1981)
CHAM820101	0.0218117	0.769484	0.000601386	0.00353338	0.0184625	0.858315	0.02673	0.0603365	Physicochemical properties	Polarizability parameter (Charton-Charton, 1982)
CHAM820102	0.154326	0.910153	0.377682	0.471236	0.116147	0.907735	0.345443	0.445792	Hydrophobicity	Free energy of solution in water, kcal/mole (Charton-Charton, 1982)
CHAM830101	-0.0203298	1.11038	0.122994	0.193938	0.0604474	1.07129	0.27043	0.370394	Alpha and turn propensities	The Chou-Fasman parameter of the coil conformation (Charton-Charton, 1983)
CHAM830102	0.117045	1.03028	0.454211	0.557767	0.13653	0.993925	0.883218	0.908262	Alpha and turn propensities	A parameter defined from the residuals obtained from the best correlation of
CHAM830103	0.0504572	0.775262	0.0198941	0.0460526	0.0210438	0.893643	0.277597	0.373963	Physicochemical properties	The number of atoms in the side chain labelled 1+1 (Charton-Charton, 1983)
CHAM830104	-0.0318832	0.948227	0.570077	0.659834	-0.0719835	0.968519	0.754438	0.81919	Other properties	The number of atoms in the side chain labelled 2+1 (Charton-Charton, 1983)
CHAM830105	-0.0140618	0.781245	0.0034859	0.0116339	-0.00819623	0.853706	0.0459358	0.0908694	Physicochemical properties	The number of atoms in the side chain labelled 3+1 (Charton-Charton, 1983)
CHAM830106	-0.0173172	0.841636	0.0564613	0.100376	0	0.833724	0.036529	0.0755581	Physicochemical properties	The number of bonds in the longest chain (Charton-Charton, 1983)
CHAM830107	0.0872514	1.02397	0.597939	0.689151	0.0886372	1.00192	0.799518	0.852029	Beta propensity	A parameter of charge transfer capability (Charton-Charton, 1983)
CHAM830108	0.0888574	0.972626	0.780405	0.843459	0.112979	0.997784	0.924743	0.936797	Composition	A parameter of charge transfer donor capability (Charton-Charton, 1983)
CHOC750101	-0.0153866	0.848291	0.0386229	0.0761263	-0.015893	0.883667	0.0973012	0.165931	Physicochemical properties	Average volume of buried residue (Chothia, 1975)
CHOC760101	-0.0178108	0.804397	0.00788325	0.0212094	-0.0143866	0.866302	0.0581423	0.109824	Physicochemical properties	Residue accessible surface area in tripeptide (Chothia, 1976)
CHOC760102	-0.043999	0.723821	0.0021824	0.00860307	-0.0108503	0.703583	0.000574736	0.00336124	Hydrophobicity	Residue accessible surface area in folded protein (Chothia, 1976)
CHOC760103	0.0656576	0.790826	0.00755348	0.0208584	0.0280652	0.805337	0.00864804	0.0250241	Hydrophobicity	Proportion of residues 95% buried (Chothia, 1976)
CHOC760104	0.0547579	0.846819	0.044485	0.0858149	0.0300466	0.810288	0.00970919	0.027158	Hydrophobicity	Proportion of residues 100% buried (Chothia, 1976)
CHOP780101	-0.00399003	1.0471	0.362953	0.457052	0.0765548	1.02666	0.513061	0.6094	Alpha and turn propensities	Normalized frequency of beta-turn (Chou-Fasman, 1978a)
CHOP780201	-0.0639954	1.36626	3.46074e-06	0.000188264	-0.114567	1.20919	0.00383611	0.0132079	Alpha and turn propensities	Normalized frequency of alpha-helix (Chou-Fasman, 1978b)
CHOP780202	0.0567542	0.728066	0.000173566	0.00176003	0.0486408	0.728101	7.70878e-05	0.000911647	Beta propensity	Normalized frequency of beta-sheet (Chou-Fasman, 1978b)
CHOP780203	-0.0315988	0.96662	0.84583	0.89346	0.0393157	1.01315	0.709307	0.77795	Alpha and turn propensities	Normalized frequency of beta-turn (Chou-Fasman, 1978b)
CHOP780204	0.00801863	0.888246	0.197995	0.283841	-0.0098298	0.819449	0.0329468	0.0702435	Hydrophobicity	Normalized frequency of N-terminal helix (Chou-Fasman, 1978b)
CHOP780205	-0.0590269	0.969429	0.875269	0.90367	-0.0573842	0.925081	0.467584	0.562756	Alpha and turn propensities	Normalized frequency of C-terminal helix (Chou-Fasman, 1978b)
CHOP780206	0.0656242	0.933422	0.503843	0.603352	0.0641385	0.997868	0.836534	0.875144	Other properties	Normalized frequency of N-terminal non helical region (Chou-Fasman, 1978b)
CHOP780207	-0.0250448	1.08208	0.203874	0.290333	0.058014	1.06135	0.281184	0.375833	Alpha and turn propensities	Normalized frequency of C-terminal non helical region (Chou-Fasman, 1978b)
CHOP780208	-0.013535	0.778459	0.00794782	0.0212094	-0.0186715	0.780351	0.00492235	0.0157307	Beta propensity	Normalized frequency of N-terminal beta-sheet (Chou-Fasman, 1978b)
CHOP780209	0.0818575	0.736489	0.000728496	0.00400305	0.0899259	0.749646	0.000739986	0.00379767	Beta propensity	Normalized frequency of C-terminal beta-sheet (Chou-Fasman, 1978b)
CHOP780210	-0.0434349	1.13812	0.0262137	0.0568137	0.0592891	1.06548	0.216118	0.302232	Alpha and turn propensities	Normalized frequency of N-terminal non beta region (Chou-Fasman, 1978b)
CHOP780211	-0.0353998	0.94426	0.505751	0.603352	-0.00485887	0.934144	0.39062	0.491892	Alpha and turn propensities	Normalized frequency of C-terminal non beta region (Chou-Fasman, 1978b)
CHOP780212	0.113495	1.17805	0.00460881	0.0144924	0.154754	1.13049	0.0200875	0.0477188	Alpha and turn propensities	Frequency of the 1st residue in turn (Chou-Fasman, 1978b)
CHOP780213	-0.0772368	0.814667	0.068831	0.11783	-0.0558043	0.797493	0.0346499	0.0730603	Alpha and turn propensities	Frequency of the 2nd residue in turn (Chou-Fasman, 1978b)
CHOP780214	0.0982942	1.09126	0.146283	0.224163	0.144268	1.14746	0.0207916	0.0489202	Other properties	Frequency of the 3rd residue in turn (Chou-Fasman, 1978b)
CHOP780215	0.0664858	1.29359	0.000152945	0.00166404	0.145313	1.26241	0.000310195	0.00214953	Alpha and turn propensities	Frequency of the 4th residue in turn (Chou-Fasman, 1978b)
CHOP780216	-0.0298261	0.966475	0.768373	0.837665	0.0335463	0.939574	0.490612	0.586578	Alpha and turn propensities	Normalized frequency of the 2nd and 3rd residues in turn (Chou-Fasman, 1978b)
CIDH920101	0.070932	0.762378	0.00533891	0.0161354	0.0517903	0.747179	0.00180296	0.00721186	Hydrophobicity	Normalized hydrophobicity scales for alpha-proteins (Cid et al., 1992)
CIDH920102	0.046299	0.687916	0.000198056	0.00185762	0.046299	0.658783	2.21604e-05	0.00046954	Hydrophobicity	Normalized hydrophobicity scales for beta-proteins (Cid et al., 1992)
CIDH920103	-0.00224615	0.693615	2.7005e-05	0.000565027	-0.00292246	0.64463	3.71571e-07	2.52668e-05	Hydrophobicity	Normalized hydrophobicity scales for alpha+beta-proteins (Cid et al., 1992)
CIDH920104	0.04893	0.655314	5.70788e-06	0.000258757	0.0596831	0.594643	2.28636e-08	4.14592e-06	Hydrophobicity	Normalized hydrophobicity scales for alpha/beta-proteins (Cid et al., 1992)
CIDH920105	0.0155037	0.681337	2.36638e-05	0.000514923	0.0400333	0.634486	3.626e-07	2.52668e-05	Hydrophobicity	Normalized average hydrophobicity scales (Cid et al., 1992)
COHE430101	-0.079368	1.06667	0.227911	0.318723	-0.0865148	1.08199	0.147688	0.228895	Physicochemical properties	Partial specific volume (Cohn-Edsall, 1943)
CRAJ730101	-0.0292652	1.19732	0.00864943	0.0227309	-0.107177	1.12335	0.0752244	0.135056	Alpha and turn propensities	Normalized frequency of middle helix (Crawford et al., 1973)
CRAJ730102	0.0145856	0.778728	0.00788321	0.0212094	0.0101917	0.828413	0.0302233	0.0665647	Beta propensity	Normalized frequency of beta-sheet (Crawford et al., 1973)
CRAJ730103	0.0403891	1.24027	0.000116694	0.00147632	0.0926535	1.20344	0.000580369	0.00336124	Alpha and turn propensities	Normalized frequency of turn (Crawford et al., 1973)
DAWD720101	-0.0271621	0.759151	0.00115149	0.00569463	-0.0393849	0.886125	0.126387	0.204394	Physicochemical properties	Size (Dawson, 1972)
DAYM780101	-0.0904813	1.03173	0.559829	0.650741	-0.0902497	1.09572	0.138462	0.219602	Composition	Amino acid composition (Dayhoff et al., 1978a)
DAYM780201	-0.0601099	0.944294	0.546333	0.641911	-0.164661	1.0308	0.504779	0.600875	Physicochemical properties	Relative mutability (Dayhoff et al., 1978b)
DESM900101	0.0638456	0.721932	0.000845677	0.00455493	0.0469805	0.72431	0.00054937	0.00328415	Hydrophobicity	Membrane preference for cytochrome b: MPH89 (Degli Esposti et al., 1990)
DESM900102	0.0462862	0.755543	0.00754088	0.0208584	0.0330283	0.722955	0.00144228	0.006227	Hydrophobicity	Average membrane preference: AMP07 (Degli Esposti et al., 1990)
EISD840101	0.0633815	0.774357	0.0135118	0.0329615	0.0157083	0.774876	0.00886325	0.0255112	Hydrophobicity	Consensus normalized hydrophobicity scale (Eisenberg, 1984)
EISD860101	0.05851	0.825931	0.0491603	0.0922964	0.00567965	0.734304	0.000934471	0.00445923	Hydrophobicity	Solvation free energy (Eisenberg-McLachlan, 1986)
EISD860102	-0.136109	0.78635	0.0200044	0.0461119	-0.0837811	0.820493	0.0419054	0.0844316	Hydrophobicity	Atom-based hydrophobic moment (Eisenberg-McLachlan, 1986)
EISD860103	0.0481639	0.814889	0.0275472	0.0587674	0.0376488	0.773253	0.00461896	0.0149566	Hydrophobicity	Direction of hydrophobic moment (Eisenberg-McLachlan, 1986)
FASG760101	0.0275899	0.792556	0.00743052	0.0207292	0.0275899	0.882295	0.126619	0.204394	Physicochemical properties	Molecular weight (Fasman, 1976)
FASG760102	0.0641218	1.02458	0.562043	0.651922	0.0168996	1.00281	0.793958	0.850223	Hydrophobicity	Melting point (Fasman, 1976)
FASG760103	0.00393163	0.955653	0.696894	0.776865	0.00393163	0.942093	0.55696	0.646027	Alpha and turn propensities	Optical rotation (Fasman, 1976)
FASG760104	-0.0895943	0.888487	0.294388	0.390603	-0.0654924	0.969031	0.90226	0.924349	Alpha and turn propensities	pK-N (Fasman, 1976)
FASG760105	0.0137824	1.06939	0.26809	0.365516	-0.0607321	1.01917	0.600679	0.680207	Hydrophobicity	pK-C (Fasman, 1976)
FAUJ830101	0.0557208	0.769052	0.00650019	0.0187064	0.0298575	0.679359	6.97077e-05	0.000881884	Hydrophobicity	Hydrophobic parameter pi (Fauchere-Pliska, 1983)
FAUJ880101	0.00728437	0.843718	0.0683895	0.117734	0.00879374	0.807303	0.0169711	0.0415869	Physicochemical properties	Graph shape index (Fauchere et al., 1988)
FAUJ880102	0.0136254	0.902389	0.298586	0.395024	-0.035397	0.921406	0.38796	0.489676	Other properties	Smoothed upsilon steric parameter (Fauchere et al., 1988)
FAUJ880103	0.0185175	0.798416	0.00532625	0.0161354	0.0185175	0.821315	0.0106865	0.02951	Physicochemical properties	Normalized van der Waals volume (Fauchere et al., 1988)
FAUJ880104	-0.0687951	0.819102	0.0129271	0.0321111	-0.046356	0.889207	0.1218	0.197788	Physicochemical properties	STERIMOL length of the side chain (Fauchere et al., 1988)
FAUJ880105	0.00900398	0.820513	0.0574152	0.101409	-0.02011	0.900003	0.300576	0.396877	Physicochemical properties	STERIMOL minimum width of the side chain (Fauchere et al., 1988)
FAUJ880106	-0.0014513	0.780227	0.00871632	0.0227965	0.00289537	0.876927	0.140125	0.22095	Physicochemical properties	STERIMOL maximum width of the side chain (Fauchere et al., 1988)
FAUJ880107	0.0121813	0.988868	0.972301	0.974281	-0.0329175	0.952833	0.646831	0.722538	Other properties	N.m.r. chemical shift of alpha-carbon (Fauchere et al., 1988)
FAUJ880108	0.0459848	0.960709	0.726426	0.801574	0.0459848	1.02389	0.601433	0.680207	Hydrophobicity	Localized electrical effect (Fauchere et al., 1988)
FAUJ880109	-0.0770709	0.777356	0.00708411	0.0199677	-0.0468518	0.794487	0.0082226	0.0239203	Hydrophobicity	Number of hydrogen bond donors (Fauchere et al., 1988)
FAUJ880110	-0.00639535	0.932578	0.502646	0.603352	-0.0231651	0.843453	0.0718999	0.131253	Hydrophobicity	Number of full nonbonding orbitals (Fauchere et al., 1988)
FAUJ880111	-0.117167	0.736995	0.00156597	0.00692592	-0.033829	0.83089	0.0326453	0.0699174	Hydrophobicity	Positive charge (Fauchere et al., 1988)
FAUJ880112	-0.0161884	0.906857	0.356845	0.45145	-0.0155382	0.861002	0.131641	0.210626	Hydrophobicity	Negative charge (Fauchere et al., 1988)
FAUJ880113	0.0248478	1.05642	0.415591	0.512656	0.0128396	1.0266	0.61993	0.696781	Alpha and turn propensities	pK-a(RCOOH) (Fauchere et al., 1988)
FINA770101	-0.0144046	1.00472	0.790576	0.846601	-0.0666074	1.03086	0.544125	0.635202	Alpha and turn propensities	Helix-coil equilibrium constant (Finkelstein-Ptitsyn, 1977)
FINA910101	0.0766655	0.882997	0.152461	0.231672	0.058072	0.943646	0.485644	0.583201	Hydrophobicity	Helix initiation parameter at posision i-1 (Finkelstein et al., 1991)
FINA910102	-0.0480694	0.909871	0.373391	0.468029	-0.050392	0.839305	0.0780077	0.138229	Alpha and turn propensities	Helix initiation parameter at posision i,i+1,i+2 (Finkelstein et al., 1991)
FINA910103	-0.134061	0.727859	0.00137062	0.00637282	-0.0991923	0.801235	0.0162005	0.0409158	Hydrophobicity	Helix termination parameter at posision j-2,j-1,j (Finkelstein et al., 1991)
FINA910104	-0.0349833	0.760282	0.00769923	0.0211535	0.0170485	0.867052	0.110798	0.183762	Hydrophobicity	Helix termination parameter at posision j+1 (Finkelstein et al., 1991)
GARJ730101	0.168556	0.760672	0.00293112	0.0102873	0.103462	0.807941	0.0120927	0.0320899	Physicochemical properties	Partition coefficient (Garel et al., 1973)
GEIM800101	-0.0782267	1.19095	0.00971358	0.0249254	-0.100256	1.12072	0.0768039	0.13654	Alpha and turn propensities	Alpha-helix indices (Geisow-Roberts, 1980)
GEIM800102	0.0344939	0.782576	0.0179949	0.0423776	0.0224682	0.883914	0.189637	0.274368	Alpha and turn propensities	Alpha-helix indices for alpha-proteins (Geisow-Roberts, 1980)
GEIM800103	0.0459623	1.0375	0.486557	0.590748	-0.000334984	0.934746	0.532969	0.623516	Alpha and turn propensities	Alpha-helix indices for beta-proteins (Geisow-Roberts, 1980)
GEIM800104	-0.0694155	1.10385	0.114869	0.184333	-0.101823	0.970996	0.812385	0.859521	Alpha and turn propensities	Alpha-helix indices for alpha/beta-proteins (Geisow-Roberts, 1980)
GEIM800105	0.099676	0.956272	0.708863	0.786982	0.0982171	0.86952	0.109489	0.182148	Beta propensity	Beta-strand indices (Geisow-Roberts, 1980)
GEIM800106	-0.00918526	0.845571	0.0449844	0.0861673	-0.0138742	0.831006	0.020863	0.0489202	Beta propensity	Beta-strand indices for beta-proteins (Geisow-Roberts, 1980)
GEIM800107	0.0427335	0.75166	0.00150837	0.00683794	0.0448628	0.744489	0.000615695	0.00347154	Beta propensity	Beta-strand indices for alpha/beta-proteins (Geisow-Roberts, 1980)
GEIM800108	0.000417168	0.922191	0.449354	0.553051	0.0610614	0.917112	0.387323	0.489676	Alpha and turn propensities	Aperiodic indices (Geisow-Roberts, 1980)
GEIM800109	-0.0233309	0.808705	0.0347521	0.0705416	0.0071889	0.850903	0.0875284	0.152126	Alpha and turn propensities	Aperiodic indices for alpha-proteins (Geisow-Roberts, 1980)
GEIM800110	-0.0161164	0.766378	0.0131739	0.0322819	0.0164267	0.779988	0.0133669	0.0346266	Beta propensity	Aperiodic indices for beta-proteins (Geisow-Roberts, 1980)
GEIM800111	-0.00597711	0.948588	0.64847	0.738007	0.0329398	0.923487	0.402853	0.506125	Alpha and turn propensities	Aperiodic indices for alpha/beta-proteins (Geisow-Roberts, 1980)
GOLD730101	-0.0124461	0.761176	0.00190351	0.00778791	-0.0122214	0.721877	0.000133871	0.0012707	Hydrophobicity	Hydrophobicity factor (Goldsack-Chalifoux, 1973)
GOLD730102	-0.0145263	0.839251	0.032514	0.0667458	-0.0145263	0.863122	0.0597061	0.112388	Physicochemical properties	Residue volume (Goldsack-Chalifoux, 1973)
GRAR740101	0.0132159	1.20477	0.00540113	0.0162332	0.0460279	1.20803	0.00306724	0.0111239	Hydrophobicity	Composition (Grantham, 1974)
GRAR740102	-0.0441922	0.862283	0.116733	0.186773	-0.0330374	0.783727	0.00892013	0.0255397	Hydrophobicity	Polarity (Grantham, 1974)
GRAR740103	-0.00576506	0.824384	0.0361844	0.0723537	-0.012688	0.867447	0.101783	0.172491	Physicochemical properties	Volume (Grantham, 1974)
GUYH850101	-0.082441	0.691629	0.000299756	0.00226013	-0.0796594	0.651294	1.58595e-05	0.000375111	Hydrophobicity	Partition energy (Guy, 1985)
HOPA770101	0.00624678	0.882701	0.17617	0.259018	0.0143509	0.861653	0.0898858	0.155231	Hydrophobicity	Hydration number (Hopfinger, 1971), Cited by Charton-Charton (1982)
HOPT810101	-0.110376	0.810945	0.0501612	0.0934511	-0.0488089	0.775667	0.0126046	0.0331251	Hydrophobicity	Hydrophilicity value (Hopp-Woods, 1981)
HUTJ700101	0.094087	0.779472	0.00289449	0.0102247	0.0669275	0.78982	0.00287281	0.0105595	Composition	Heat capacity (Hutchens, 1970)
HUTJ700102	-0.0233653	0.77483	0.00275159	0.00991302	-0.00191943	0.881458	0.120234	0.195829	Physicochemical properties	Absolute entropy (Hutchens, 1970)
HUTJ700103	-0.0475885	0.839065	0.0478131	0.0909452	-0.0309797	0.906746	0.265605	0.366724	Physicochemical properties	Entropy of formation (Hutchens, 1970)
ISOY800101	-0.0505173	1.26021	0.00102369	0.00535469	-0.0980442	1.117	0.103534	0.173836	Alpha and turn propensities	Normalized relative frequency of alpha-helix (Isogai et al., 1980)
ISOY800102	0.0899721	1.04658	0.475676	0.581501	0.0863099	0.923677	0.452844	0.54868	Beta propensity	Normalized relative frequency of extended structure (Isogai et al., 1980)
ISOY800103	0.0116058	0.877124	0.180844	0.264459	0.0490794	0.981794	0.931552	0.941941	Alpha and turn propensities	Normalized relative frequency of bend (Isogai et al., 1980)
ISOY800104	-0.0840942	0.844273	0.0851495	0.142967	-0.0608486	0.841173	0.0601534	0.112839	Alpha and turn propensities	Normalized relative frequency of bend R (Isogai et al., 1980)
ISOY800105	0.058616	0.999437	0.786394	0.845166	0.158782	1.13874	0.0389529	0.079663	Other properties	Normalized relative frequency of bend S (Isogai et al., 1980)
ISOY800106	-0.0816252	0.908148	0.292393	0.388904	-0.115557	1.03146	0.440615	0.53864	Alpha and turn propensities	Normalized relative frequency of helix end (Isogai et al., 1980)
ISOY800107	-0.0175944	0.960742	0.787683	0.845166	-0.0145143	0.924139	0.451308	0.54868	Hydrophobicity	Normalized relative frequency of double bend (Isogai et al., 1980)
ISOY800108	0.0606333	1.0652	0.333254	0.428214	0.131062	1.22026	0.00377267	0.0130722	Other properties	Normalized relative frequency of coil (Isogai et al., 1980)
JANJ780101	-0.0634962	0.753304	0.00212048	0.00842003	-0.0431593	0.748352	0.00104632	0.00485281	Hydrophobicity	Average accessible surface area (Janin et al., 1978)
JANJ780102	0.0753541	0.738856	0.00488934	0.0151125	0.0561111	0.722182	0.00178665	0.00721186	Hydrophobicity	Percentage of buried residues (Janin et al., 1978)
JANJ780103	-0.0609289	0.76072	0.00284478	0.0101813	-0.0443246	0.738077	0.00065373	0.00352108	Hydrophobicity	Percentage of exposed residues (Janin et al., 1978)
JANJ790101	0.100812	0.778604	0.00579809	0.0171422	0.113836	0.763071	0.00179208	0.00721186	Hydrophobicity	Ratio of buried and accessible molar fractions (Janin, 1979)
JANJ790102	0.0655674	0.726655	0.00209257	0.00842003	0.0415644	0.713827	0.000737912	0.00379767	Hydrophobicity	Transfer free energy (Janin, 1979)
JOND750101	0.00314414	0.745464	0.00159116	0.00695397	0.0104636	0.70783	0.000137815	0.0012707	Hydrophobicity	Hydrophobicity (Jones, 1975)
JOND750102	0.0100449	1.08725	0.219474	0.308512	-0.0219438	1.09884	0.157743	0.239699	Hydrophobicity	pK (-COOH) (Jones, 1975)
JOND920101	-0.103302	1.25556	0.000255128	0.0020554	-0.0923014	1.2442	0.000274576	0.00196539	Composition	Relative frequency of occurrence (Jones et al., 1992)
JOND920102	-0.12875	0.953503	0.652948	0.741553	-0.177982	1.07166	0.212144	0.297438	Physicochemical properties	Relative mutability (Jones et al., 1992)
JUKT750101	-0.0379529	1.16452	0.016674	0.0397572	-0.0455608	1.19727	0.00271753	0.010069	Composition	Amino acid distribution (Jukes et al., 1975)
JUNJ780101	-0.0614401	1.01181	0.693916	0.775134	-0.0586872	1.09666	0.116965	0.192816	Composition	Sequence frequency (Jungck, 1978)
KANM800101	-0.06343	1.27162	0.000408012	0.0026742	-0.0827255	1.14114	0.0506683	0.0980909	Alpha and turn propensities	Average relative probability of helix (Kanehisa-Tsong, 1980)
KANM800102	0.0686528	0.737654	0.000660682	0.00372938	0.0583524	0.726089	0.000165533	0.00141212	Beta propensity	Average relative probability of beta-sheet (Kanehisa-Tsong, 1980)
KANM800103	-0.0258752	1.22046	0.00167993	0.00719591	-0.0864451	1.13284	0.0397892	0.0810687	Alpha and turn propensities	Average relative probability of inner helix (Kanehisa-Tsong, 1980)
KANM800104	0.0713786	0.775706	0.00642139	0.0186326	0.0654246	0.756167	0.00178781	0.00721186	Beta propensity	Average relative probability of inner beta-sheet (Kanehisa-Tsong, 1980)
KARP850101	-0.0688084	0.657688	0.000127805	0.00153264	-0.071091	0.671853	0.000142847	0.00129515	Hydrophobicity	Flexibility parameter for no rigid neighbors (Karplus-Schulz, 1985)
KARP850102	-0.0454146	0.652567	1.3229e-05	0.00037528	-0.0403886	0.696804	6.55782e-05	0.000881884	Hydrophobicity	Flexibility parameter for one rigid neighbor (Karplus-Schulz, 1985)
KARP850103	0.0170228	0.880039	0.164273	0.246651	0.0720757	0.946467	0.592986	0.676278	Composition	Flexibility parameter for two rigid neighbors (Karplus-Schulz, 1985)
KHAG800101	-0.103087	0.910871	0.345907	0.439657	-0.0862186	0.880077	0.148872	0.230074	Hydrophobicity	The Kerr-constant increments (Khanarian-Moore, 1980)
KLEP840101	-0.116692	0.830314	0.0975998	0.160406	-0.0386569	0.833004	0.0893266	0.154757	Hydrophobicity	Net charge (Klein et al., 1984)
KRIW710101	-0.0775492	0.695319	0.00121556	0.00590414	-0.0618606	0.825191	0.0578264	0.109823	Hydrophobicity	Side chain interaction parameter (Krigbaum-Rubin, 1971)
KRIW790101	-0.0830264	0.649631	1.47975e-06	0.000114998	-0.0746164	0.67346	2.60137e-06	0.000101438	Hydrophobicity	Side chain interaction parameter (Krigbaum-Komoriya, 1979)
KRIW790102	-0.0557847	0.652315	8.81915e-06	0.000319841	-0.0325463	0.695788	4.51629e-05	0.00070196	Hydrophobicity	Fraction of site occupied by water (Krigbaum-Komoriya, 1979)
KRIW790103	-0.00534678	0.784094	0.00275091	0.00991302	-0.0080926	0.858499	0.04068	0.0825743	Physicochemical properties	Side chain volume (Krigbaum-Komoriya, 1979)
KYTJ820101	0.0502301	0.842355	0.0551371	0.0989919	0.0178837	0.8033	0.0110003	0.0299209	Hydrophobicity	Hydropathy index (Kyte-Doolittle, 1982)
LAWE840101	-0.0313825	0.892472	0.215436	0.304408	-0.0462583	0.886573	0.154988	0.237422	Hydrophobicity	Transfer free energy, CHP/water (Lawson et al., 1984)
LEVM760101	-0.093522	0.793891	0.0184615	0.0431032	-0.0388475	0.75328	0.00256641	0.00969531	Hydrophobicity	Hydrophobic parameter (Levitt, 1976)
LEVM760102	-0.0148228	0.79006	0.00643919	0.0186326	-0.0134478	0.850437	0.0442395	0.0878331	Physicochemical properties	Distance between C-alpha and centroid of side chain (Levitt, 1976)
LEVM760103	-0.0460336	1.01434	0.774703	0.841375	-0.0655838	1.02878	0.607222	0.68533	Other properties	Side chain angle theta(AAR) (Levitt, 1976)
LEVM760104	-0.0151888	0.821659	0.0363098	0.0723537	0.0102173	0.892913	0.20152	0.288492	Other properties	Side chain torsion angle phi(AAAR) (Levitt, 1976)
LEVM760105	-0.00726139	0.790678	0.00505682	0.0155419	0.00254711	0.854564	0.047407	0.0930898	Physicochemical properties	Radius of gyration of side chain (Levitt, 1976)
LEVM760106	-0.0117199	0.816948	0.0183748	0.0430858	-0.0176336	0.874292	0.0927757	0.159211	Physicochemical properties	van der Waals parameter R0 (Levitt, 1976)
LEVM760107	0.0982278	0.759191	0.000572331	0.00342141	0.0947815	0.764053	0.00036546	0.00242452	Physicochemical properties	van der Waals parameter epsilon (Levitt, 1976)
LEVM780101	-0.0713054	1.14624	0.0321332	0.0662579	-0.0857937	1.06148	0.270987	0.370394	Alpha and turn propensities	Normalized frequency of alpha-helix, with weights (Levitt, 1978)
LEVM780102	0.0171106	0.783459	0.00417817	0.0133701	-0.00235221	0.851135	0.0432215	0.086443	Beta propensity	Normalized frequency of beta-sheet, with weights (Levitt, 1978)
LEVM780103	-0.0105255	0.964343	0.80831	0.86051	0.0199289	0.929899	0.487349	0.58396	Alpha and turn propensities	Normalized frequency of reverse turn, with weights (Levitt, 1978)
LEVM780104	-0.0574414	1.18376	0.0082473	0.0218855	-0.0801631	1.15022	0.0231107	0.0534988	Alpha and turn propensities	Normalized frequency of alpha-helix, unweighted (Levitt, 1978)
LEVM780105	0.0914328	0.794549	0.0102441	0.02592	0.0406822	0.780322	0.00401875	0.0136111	Beta propensity	Normalized frequency of beta-sheet, unweighted (Levitt, 1978)
LEVM780106	-0.0164402	0.89061	0.247136	0.343842	0.030864	0.875666	0.159414	0.241353	Alpha and turn propensities	Normalized frequency of reverse turn, unweighted (Levitt, 1978)
LEWP710101	0.000256433	0.957454	0.676554	0.760424	0.0199857	1.03687	0.515818	0.610322	Alpha and turn propensities	Frequency of occurrence in beta-bends (Lewis et al., 1971)
LIFS790101	0.0319644	0.679237	0.00019546	0.00185762	0.00663415	0.715499	0.000494084	0.00315412	Beta propensity	Conformational preference for all beta-strands (Lifson-Sander, 1979)
LIFS790102	0.0058411	0.801624	0.00795352	0.0212094	0.0105687	0.846827	0.0307862	0.0667239	Beta propensity	Conformational preference for parallel beta-strands (Lifson-Sander, 1979)
LIFS790103	0.0817253	0.72286	0.0064023	0.0186326	0.0272984	0.720132	0.00409306	0.0136603	Beta propensity	Conformational preference for antiparallel beta-strands (Lifson-Sander, 1979)
MANP780101	0.0506496	0.672861	1.90092e-05	0.00044961	0.0506496	0.639753	7.13048e-07	4.30998e-05	Hydrophobicity	Average surrounding hydrophobicity (Manavalan-Ponnuswamy, 1978)
MAXF760101	-0.0595638	1.23497	0.00184299	0.00769069	-0.0984118	1.11021	0.10659	0.178415	Alpha and turn propensities	Normalized frequency of alpha-helix (Maxfield-Scheraga, 1976)
MAXF760102	0.0756839	1.02055	0.656218	0.743714	0.0514465	0.89398	0.346636	0.445792	Beta propensity	Normalized frequency of extended structure (Maxfield-Scheraga, 1976)
MAXF760103	0.0981698	0.992293	0.95792	0.968404	0.0837995	0.970726	0.776238	0.836185	Other properties	Normalized frequency of zeta R (Maxfield-Scheraga, 1976)
MAXF760104	0.0857303	1.12395	0.0904497	0.150182	0.159087	1.15359	0.0304413	0.0667135	Other properties	Normalized frequency of left-handed alpha-helix (Maxfield-Scheraga, 1976)
MAXF760105	0.072081	0.84091	0.0905511	0.150182	0.0918636	0.96861	0.85537	0.892066	Other properties	Normalized frequency of zeta L (Maxfield-Scheraga, 1976)
MAXF760106	-0.0639702	0.822055	0.0237428	0.0527187	-0.0749346	0.848716	0.0476119	0.0930898	Alpha and turn propensities	Normalized frequency of alpha region (Maxfield-Scheraga, 1976)
MCMT640101	0.0811705	0.849055	0.0794931	0.134717	0.0870273	0.883152	0.180655	0.265611	Physicochemical properties	Refractivity (McMeekin et al., 1964), Cited by Jones (1975)
MEEJ800101	-0.0142785	0.986339	0.950795	0.964986	-0.0190759	0.860162	0.149314	0.230105	Hydrophobicity	Retention coefficient in HPLC, pH7.4 (Meek, 1980)
MEEJ800102	0.0396367	0.822667	0.0383572	0.0758775	0.0126901	0.780903	0.00713829	0.0218159	Hydrophobicity	Retention coefficient in HPLC, pH2.1 (Meek, 1980)
MEEJ810101	0.0489432	0.744935	0.00149008	0.0068118	0.0308539	0.715916	0.000232143	0.00177867	Hydrophobicity	Retention coefficient in NaClO4 (Meek-Rossetti, 1981)
MEEJ810102	0.0632738	0.741845	0.00240474	0.00927786	0.0364048	0.726434	0.000543742	0.00328415	Hydrophobicity	Retention coefficient in NaH2PO4 (Meek-Rossetti, 1981)
MEIH800101	-0.0300556	0.724045	0.000398826	0.0026742	-0.0258314	0.689904	3.31284e-05	0.000600728	Hydrophobicity	Average reduced distance for C-alpha (Meirovitch et al., 1980)
MEIH800102	-0.0555604	0.708444	0.000604052	0.00353338	-0.0288874	0.72266	0.000652498	0.00352108	Hydrophobicity	Average reduced distance for side chain (Meirovitch et al., 1980)
MEIH800103	0.0298038	0.7568	0.0034088	0.0114469	0.0237107	0.75467	0.00221893	0.00856097	Hydrophobicity	Average side chain orientation angle (Meirovitch et al., 1980)
MIYS850101	0.0523644	0.735933	0.00269792	0.00991302	0.0372927	0.696117	0.000266317	0.00193168	Hydrophobicity	Effective partition energy (Miyazawa-Jernigan, 1985)
NAGK730101	-0.0471156	1.15093	0.0304984	0.0638121	-0.0861011	1.07624	0.205819	0.291577	Alpha and turn propensities	Normalized frequency of alpha-helix (Nagano, 1973)
NAGK730102	0.0461409	0.75652	0.000418892	0.00271283	0.0368649	0.792251	0.0017928	0.00721186	Beta propensity	Normalized frequency of bata-structure (Nagano, 1973)
NAGK730103	-0.0191528	1.17276	0.0118622	0.0298752	0.0378748	1.10697	0.0873346	0.152126	Alpha and turn propensities	Normalized frequency of coil (Nagano, 1973)
NAKH900101	-0.133454	1.30943	2.2178e-05	0.000502701	-0.133454	1.2781	6.46961e-05	0.000881884	Composition	AA composition of total proteins (Nakashima et al., 1990)
NAKH900102	-0.194864	0.876998	0.149329	0.227549	-0.175135	0.985691	0.914817	0.930206	Composition	SD of AA composition of total proteins (Nakashima et al., 1990)
NAKH900103	-0.126597	1.07303	0.324168	0.421883	-0.165251	1.06166	0.386933	0.489676	Composition	AA composition of mt-proteins (Nakashima et al., 1990)
NAKH900104	0.0146832	0.927759	0.504995	0.603352	-0.0248841	0.85039	0.0869441	0.152082	Hydrophobicity	Normalized composition of mt-proteins (Nakashima et al., 1990)
NAKH900105	-0.116767	1.09986	0.173077	0.25655	-0.163968	0.992607	0.877633	0.907281	Composition	AA composition of mt-proteins from animal (Nakashima et al., 1990)
NAKH900106	-0.0292629	0.977729	0.835721	0.885717	-0.04674	0.868561	0.127731	0.205579	Hydrophobicity	Normalized composition from animal (Nakashima et al., 1990)
NAKH900107	-0.0733694	1.08722	0.175125	0.258224	-0.0927133	1.1574	0.0219378	0.0512196	Composition	AA composition of mt-proteins from fungi and plant (Nakashima et al., 1990)
NAKH900108	0.0190905	0.882099	0.122112	0.193107	0.00994493	0.87328	0.0734357	0.132282	Hydrophobicity	Normalized composition from fungi and plant (Nakashima et al., 1990)
NAKH900109	-0.0460189	1.29949	8.52352e-06	0.000319841	-0.076678	1.30482	1.48413e-06	7.33967e-05	Composition	AA composition of membrane proteins (Nakashima et al., 1990)
NAKH900110	0.0563766	0.890551	0.165942	0.248001	-0.0138876	0.889468	0.146121	0.227114	Hydrophobicity	Normalized composition of membrane proteins (Nakashima et al., 1990)
NAKH900111	-0.0290237	1.09278	0.1206	0.191272	-0.0550051	1.10477	0.0853841	0.149835	Composition	Transmembrane regions of non-mt-proteins (Nakashima et al., 1990)
NAKH900112	-0.0859069	1.06209	0.34223	0.436453	-0.137704	1.06338	0.320044	0.418335	Composition	Transmembrane regions of mt-proteins (Nakashima et al., 1990)
NAKH900113	0.00857029	0.842331	0.0492021	0.0922964	-0.00862964	0.932856	0.422222	0.523209	Hydrophobicity	Ratio of average and computed composition (Nakashima et al., 1990)
NAKH920101	-0.185479	1.06737	0.276232	0.373806	-0.137677	1.04429	0.416291	0.517038	Composition	AA composition of CYT of single-spanning proteins (Nakashima-Nishikawa, 1992)
NAKH920102	-0.166786	1.01729	0.630876	0.721001	-0.156343	0.963959	0.824906	0.866311	Composition	AA composition of CYT2 of single-spanning proteins (Nakashima-Nishikawa,
NAKH920103	-0.111735	1.03415	0.480639	0.58625	-0.111735	1.00573	0.768547	0.831192	Composition	AA composition of EXT of single-spanning proteins (Nakashima-Nishikawa, 1992)
NAKH920104	-0.0746154	1.14922	0.00859988	0.0227104	-0.104155	1.05149	0.208668	0.293321	Composition	AA composition of EXT2 of single-spanning proteins (Nakashima-Nishikawa,
NAKH920105	-0.0406275	1.05851	0.264713	0.363426	-0.0647859	1.04473	0.343722	0.445202	Composition	AA composition of MEM of single-spanning proteins (Nakashima-Nishikawa, 1992)
NAKH920106	-0.165385	1.13882	0.0284948	0.0603157	-0.146354	1.07423	0.159719	0.241353	Composition	AA composition of CYT of multi-spanning proteins (Nakashima-Nishikawa, 1992)
NAKH920107	-0.0337948	1.13262	0.0507725	0.0939465	-0.0512924	1.15036	0.0204825	0.0484456	Composition	AA composition of EXT of multi-spanning proteins (Nakashima-Nishikawa, 1992)
NAKH920108	-0.0556922	1.01427	0.715314	0.792527	-0.0592908	1.02561	0.596781	0.677763	Composition	AA composition of MEM of multi-spanning proteins (Nakashima-Nishikawa, 1992)
NISK800101	0.0679492	0.70997	9.16439e-05	0.00124636	0.0745791	0.70028	2.24412e-05	0.00046954	Hydrophobicity	8 A contact number (Nishikawa-Ooi, 1980)
NISK860101	0.047414	0.686612	7.85165e-05	0.00122818	0.0414491	0.644637	3.34484e-06	0.000121306	Hydrophobicity	14 A contact number (Nishikawa-Ooi, 1986)
NOZY710101	0.0574116	0.781122	0.00298983	0.0104261	0.00272422	0.739384	0.000182053	0.00147817	Hydrophobicity	Transfer energy, organic solvent/water (Nozaki-Tanford, 1971)
OOBM770101	-0.0509839	0.757397	0.00265477	0.00989176	-0.0257962	0.746853	0.000920166	0.00442982	Hydrophobicity	Average non-bonded energy per atom (Oobatake-Ooi, 1977)
OOBM770102	-0.0515773	0.85082	0.0543335	0.0982927	0.0237062	0.866066	0.0725441	0.131835	Physicochemical properties	Short and medium range non-bonded energy per atom (Oobatake-Ooi, 1977)
OOBM770103	-0.0766406	0.70855	0.000322326	0.00229718	-0.0678353	0.722046	0.000297287	0.00210032	Hydrophobicity	Long range non-bonded energy per atom (Oobatake-Ooi, 1977)
OOBM770104	-0.0642766	0.736246	0.000570067	0.00342141	-0.0439163	0.786267	0.00376493	0.0130722	Physicochemical properties	Average non-bonded energy per residue (Oobatake-Ooi, 1977)
OOBM770105	-0.0510893	0.807807	0.0169437	0.0400756	-0.0233866	0.823844	0.0224878	0.0522794	Physicochemical properties	Short and medium range non-bonded energy per residue (Oobatake-Ooi, 1977)
OOBM850101	0.00534181	0.821863	0.0581243	0.101999	-0.0168658	0.789295	0.0167245	0.041168	Beta propensity	Optimized beta-structure-coil equilibrium constant (Oobatake et al., 1985)
OOBM850102	-0.0962093	0.877818	0.187301	0.273169	-0.0562006	0.890298	0.204212	0.290136	Physicochemical properties	Optimized propensity to form reverse turn (Oobatake et al., 1985)
OOBM850103	0.00886305	0.906432	0.261986	0.360812	-0.0013955	0.904813	0.224333	0.312916	Hydrophobicity	Optimized transfer energy parameter (Oobatake et al., 1985)
OOBM850104	0.0269206	0.745707	0.00211872	0.00842003	0.0179615	0.780602	0.00550591	0.0173134	Beta propensity	Optimized average non-bonded energy per atom (Oobatake et al., 1985)
OOBM850105	-0.0778508	0.751694	0.006132	0.0180314	-0.0468384	0.882198	0.204268	0.290136	Hydrophobicity	Optimized side chain interaction parameter (Oobatake et al., 1985)
PALJ810101	-0.0564241	1.17842	0.0069297	0.019737	-0.0850837	1.11382	0.0667154	0.123028	Alpha and turn propensities	Normalized frequency of alpha-helix from LG (Palau et al., 1981)
PALJ810102	-0.0316969	1.30177	6.71653e-05	0.00116653	-0.125143	1.19534	0.00611844	0.0189115	Alpha and turn propensities	Normalized frequency of alpha-helix from CF (Palau et al., 1981)
PALJ810103	0.086192	0.784664	0.00965201	0.0248848	0.0699807	0.781533	0.00572699	0.0178028	Beta propensity	Normalized frequency of beta-sheet from LG (Palau et al., 1981)
PALJ810104	0.0727769	0.707835	0.000170623	0.00176003	0.0585549	0.729687	0.000265023	0.00193168	Beta propensity	Normalized frequency of beta-sheet from CF (Palau et al., 1981)
PALJ810105	0.0070427	0.951484	0.612918	0.703433	0.0551805	1.01457	0.80191	0.852029	Alpha and turn propensities	Normalized frequency of turn from LG (Palau et al., 1981)
PALJ810106	-0.00973328	1.0865	0.109478	0.176202	0.0662977	1.07142	0.151488	0.232795	Alpha and turn propensities	Normalized frequency of turn from CF (Palau et al., 1981)
PALJ810107	0.149037	0.875549	0.192638	0.279454	0.0814805	1.08709	0.184448	0.26973	Alpha and turn propensities	Normalized frequency of alpha-helix in all-alpha class (Palau et al., 1981)
PALJ810108	-0.012646	1.16291	0.0228896	0.0510326	-0.0586042	1.04438	0.413622	0.514898	Alpha and turn propensities	Normalized frequency of alpha-helix in alpha+beta class (Palau et al., 1981)
PALJ810109	-0.0855006	1.15016	0.0209601	0.0478506	-0.108657	0.982114	0.880597	0.907281	Alpha and turn propensities	Normalized frequency of alpha-helix in alpha/beta class (Palau et al., 1981)
PALJ810110	0.075198	0.712745	0.000167849	0.00176003	0.075198	0.721162	0.000130635	0.0012707	Beta propensity	Normalized frequency of beta-sheet in all-beta class (Palau et al., 1981)
PALJ810111	0.0429116	0.839346	0.025291	0.0552542	0.0499177	0.833936	0.0151947	0.0386258	Hydrophobicity	Normalized frequency of beta-sheet in alpha+beta class (Palau et al., 1981)
PALJ810112	0.0360176	0.780892	0.00697562	0.0197643	0.0541392	0.753125	0.0009746	0.00461028	Beta propensity	Normalized frequency of beta-sheet in alpha/beta class (Palau et al., 1981)
PALJ810113	-0.0198351	0.889567	0.280045	0.377091	0.0427678	1.02658	0.596535	0.677763	Alpha and turn propensities	Normalized frequency of turn in all-alpha class (Palau et al., 1981)
PALJ810114	-0.00768435	0.979311	0.947066	0.964802	0.0115238	0.959628	0.708219	0.77795	Alpha and turn propensities	Normalized frequency of turn in all-beta class (Palau et al., 1981)
PALJ810115	-0.0176329	0.876544	0.210887	0.298756	0.0121399	0.933013	0.521114	0.613606	Alpha and turn propensities	Normalized frequency of turn in alpha+beta class (Palau et al., 1981)
PALJ810116	0.0133414	1.09661	0.145647	0.223819	0.0421145	1.05289	0.363072	0.465828	Alpha and turn propensities	Normalized frequency of turn in alpha/beta class (Palau et al., 1981)
PARJ860101	0.03355	0.819868	0.0321546	0.0662579	0.0388281	0.760376	0.00211337	0.00821197	Hydrophobicity	HPLC parameter (Parker et al., 1986)
PLIV810101	0.0222292	0.795622	0.0157456	0.0382393	-0.0126894	0.76324	0.00318186	0.0113837	Hydrophobicity	Partition coefficient (Pliska et al., 1981)
PONP800101	0.0478948	0.669279	1.67568e-05	0.000434081	0.0526736	0.620178	2.63203e-07	2.38638e-05	Hydrophobicity	Surrounding hydrophobicity in folded form (Ponnuswamy et al., 1980)
PONP800102	0.084232	0.662466	1.16011e-05	0.000374145	0.0853859	0.652703	2.61053e-06	0.000101438	Hydrophobicity	Average gain in surrounding hydrophobicity (Ponnuswamy et al., 1980)
PONP800103	0.0829186	0.724598	0.000284848	0.00219943	0.0728141	0.724882	0.000169418	0.0014179	Hydrophobicity	Average gain ratio in surrounding hydrophobicity (Ponnuswamy et al., 1980)
PONP800104	0.0635272	0.775187	0.00264959	0.00989176	0.0707657	0.821329	0.0165724	0.0410201	Hydrophobicity	Surrounding hydrophobicity in alpha-helix (Ponnuswamy et al., 1980)
PONP800105	0.052995	0.843243	0.0469801	0.0896743	0.0486402	0.852512	0.0553056	0.105937	Hydrophobicity	Surrounding hydrophobicity in beta-sheet (Ponnuswamy et al., 1980)
PONP800106	0.0395924	0.697637	0.00111861	0.00563447	0.0371362	0.746341	0.00460227	0.0149566	Hydrophobicity	Surrounding hydrophobicity in turn (Ponnuswamy et al., 1980)
PONP800107	-0.000301009	0.827203	0.0268802	0.0580271	-0.0346282	0.841997	0.0331849	0.0702435	Hydrophobicity	Accessibility reduction ratio (Ponnuswamy et al., 1980)
PONP800108	0.0681868	0.722343	0.000287058	0.00219943	0.060566	0.704819	5.76144e-05	0.000870618	Hydrophobicity	Average number of surrounding residues (Ponnuswamy et al., 1980)
PRAM820101	0.0086757	0.919664	0.376637	0.471012	0.043291	1.10191	0.103157	0.173836	Hydrophobicity	Intercept in regression analysis (Prabhakaran-Ponnuswamy, 1982)
PRAM820102	-0.0354443	0.750825	0.000880296	0.00469491	-0.029249	0.828352	0.0174928	0.0424826	Other properties	Slope in regression analysis x 1.0E1 (Prabhakaran-Ponnuswamy, 1982)
PRAM820103	-0.0395258	0.935057	0.542102	0.638319	-0.0947969	0.961279	0.766332	0.830447	Other properties	Correlation coefficient in regression analysis (Prabhakaran-Ponnuswamy, 1982)
PRAM900101	-0.0862799	0.816517	0.0543862	0.0982927	-0.00187748	0.76216	0.00779212	0.0230376	Hydrophobicity	Hydrophobicity (Prabhakaran, 1990)
PRAM900102	-0.0713054	1.14624	0.0314149	0.0654555	-0.0857937	1.06148	0.274471	0.371424	Alpha and turn propensities	Relative frequency in alpha-helix (Prabhakaran, 1990)
PRAM900103	0.0171106	0.783459	0.00396301	0.0128326	-0.00235221	0.851135	0.0427492	0.0858139	Beta propensity	Relative frequency in beta-sheet (Prabhakaran, 1990)
PRAM900104	-0.0161176	0.962323	0.785285	0.845166	0.0192288	0.922389	0.433192	0.531956	Alpha and turn propensities	Relative frequency in reverse-turn (Prabhakaran, 1990)
PTIO830101	0.0102805	1.01022	0.763236	0.835413	-0.0334998	0.945606	0.588454	0.672519	Alpha and turn propensities	Helix-coil equilibrium constant (Ptitsyn-Finkelstein, 1983)
PTIO830102	0.0490988	0.722081	0.000403813	0.0026742	0.0353853	0.746868	0.000647518	0.00352108	Beta propensity	Beta-coil equilibrium constant (Ptitsyn-Finkelstein, 1983)
QIAN880101	-0.0345379	1.1542	0.0163375	0.0393256	-0.0263519	1.12207	0.043965	0.0876078	Alpha and turn propensities	Weights for alpha-helix at the window position of -6 (Qian-Sejnowski, 1988)
QIAN880102	-0.0704488	1.32301	1.1692e-05	0.000374145	-0.102019	1.22017	0.00168055	0.00698134	Alpha and turn propensities	Weights for alpha-helix at the window position of -5 (Qian-Sejnowski, 1988)
QIAN880103	0.0238138	1.32789	1.24027e-05	0.000374838	-0.0328708	1.15609	0.0233279	0.0537728	Alpha and turn propensities	Weights for alpha-helix at the window position of -4 (Qian-Sejnowski, 1988)
QIAN880104	-0.026345	1.22371	0.00245737	0.00938057	-0.085977	1.20849	0.00320167	0.0113837	Alpha and turn propensities	Weights for alpha-helix at the window position of -3 (Qian-Sejnowski, 1988)
QIAN880105	0.0245295	1.20576	0.00457113	0.0144575	-0.0928842	1.17536	0.0108342	0.0296172	Alpha and turn propensities	Weights for alpha-helix at the window position of -2 (Qian-Sejnowski, 1988)
QIAN880106	-0.0147184	1.26571	0.000458224	0.00289854	-0.0636597	1.19301	0.00735827	0.0219939	Alpha and turn propensities	Weights for alpha-helix at the window position of -1 (Qian-Sejnowski, 1988)
QIAN880107	-0.0586029	1.16629	0.0120306	0.0301598	-0.086738	1.10669	0.0845083	0.148778	Alpha and turn propensities	Weights for alpha-helix at the window position of 0 (Qian-Sejnowski, 1988)
QIAN880108	0.00650542	1.12971	0.0695998	0.118691	-0.0104931	1.03	0.553617	0.643864	Alpha and turn propensities	Weights for alpha-helix at the window position of 1 (Qian-Sejnowski, 1988)
QIAN880109	0.00538456	1.00187	0.807652	0.86051	-0.0332136	0.995545	0.877402	0.907281	Alpha and turn propensities	Weights for alpha-helix at the window position of 2 (Qian-Sejnowski, 1988)
QIAN880110	-0.00918372	1.11479	0.102404	0.16679	-0.0501043	1.08932	0.171494	0.254898	Alpha and turn propensities	Weights for alpha-helix at the window position of 3 (Qian-Sejnowski, 1988)
QIAN880111	-0.0114269	1.00553	0.766552	0.837358	-0.040904	0.994156	0.879172	0.907281	Alpha and turn propensities	Weights for alpha-helix at the window position of 4 (Qian-Sejnowski, 1988)
QIAN880112	0.0174238	1.09296	0.210628	0.298756	-0.0527134	1.07227	0.304605	0.401223	Alpha and turn propensities	Weights for alpha-helix at the window position of 5 (Qian-Sejnowski, 1988)
QIAN880113	-0.0682132	0.933487	0.487648	0.590748	-0.0636935	0.952733	0.665795	0.739168	Alpha and turn propensities	Weights for alpha-helix at the window position of 6 (Qian-Sejnowski, 1988)
QIAN880114	0.0590605	0.840348	0.020133	0.0462125	0.0673201	0.845708	0.016589	0.0410201	Hydrophobicity	Weights for beta-sheet at the window position of -6 (Qian-Sejnowski, 1988)
QIAN880115	0.0284243	0.813481	0.0219663	0.0495838	0.0222769	0.806157	0.0114075	0.0307212	Hydrophobicity	Weights for beta-sheet at the window position of -5 (Qian-Sejnowski, 1988)
QIAN880116	-0.0121743	0.984969	0.873486	0.90367	0.00118341	0.998347	0.990425	0.992249	Hydrophobicity	Weights for beta-sheet at the window position of -4 (Qian-Sejnowski, 1988)
QIAN880117	-0.0255083	0.936134	0.481977	0.586567	0.0311811	1.13051	0.0683489	0.125614	Alpha and turn propensities	Weights for beta-sheet at the window position of -3 (Qian-Sejnowski, 1988)
QIAN880118	-0.0210238	0.983369	0.968047	0.974281	0.00459398	0.939668	0.516372	0.610322	Beta propensity	Weights for beta-sheet at the window position of -2 (Qian-Sejnowski, 1988)
QIAN880119	-0.00775931	0.760097	0.00889045	0.0231407	-0.0382791	0.744659	0.00362288	0.0127977	Beta propensity	Weights for beta-sheet at the window position of -1 (Qian-Sejnowski, 1988)
QIAN880120	0.0312395	0.720723	0.00114778	0.00569463	0.00646822	0.735047	0.00113567	0.00506399	Beta propensity	Weights for beta-sheet at the window position of 0 (Qian-Sejnowski, 1988)
QIAN880121	0.035511	0.681763	0.00021709	0.00190479	0.0278198	0.701744	0.000312157	0.00214953	Beta propensity	Weights for beta-sheet at the window position of 1 (Qian-Sejnowski, 1988)
QIAN880122	0.042317	0.735379	0.000664982	0.00372938	0.0541223	0.708826	8.07205e-05	0.000914832	Beta propensity	Weights for beta-sheet at the window position of 2 (Qian-Sejnowski, 1988)
QIAN880123	0.105173	1.03976	0.525074	0.623556	0.0904027	0.96221	0.651116	0.724515	Physicochemical properties	Weights for beta-sheet at the window position of 3 (Qian-Sejnowski, 1988)
QIAN880124	0.0950386	1.09681	0.136232	0.21114	0.12328	1.10109	0.108543	0.181128	Physicochemical properties	Weights for beta-sheet at the window position of 4 (Qian-Sejnowski, 1988)
QIAN880125	0.0616593	0.841565	0.0484329	0.0914844	0.0445032	0.835855	0.0307187	0.0667239	Physicochemical properties	Weights for beta-sheet at the window position of 5 (Qian-Sejnowski, 1988)
QIAN880126	0.0504121	0.918919	0.302699	0.397945	0.0522112	0.905063	0.196004	0.282081	Hydrophobicity	Weights for beta-sheet at the window position of 6 (Qian-Sejnowski, 1988)
QIAN880127	0.0328976	0.858679	0.0927744	0.153402	0.0292858	0.924746	0.381137	0.484624	Hydrophobicity	Weights for coil at the window position of -6 (Qian-Sejnowski, 1988)
QIAN880128	0.0188024	0.986749	0.900104	0.92738	0.0598734	1.02089	0.747484	0.813262	Hydrophobicity	Weights for coil at the window position of -5 (Qian-Sejnowski, 1988)
QIAN880129	0.00326751	1.02764	0.555929	0.648543	0.054898	0.985315	0.984232	0.987863	Alpha and turn propensities	Weights for coil at the window position of -4 (Qian-Sejnowski, 1988)
QIAN880130	-0.000807599	1.29648	1.37971e-05	0.00037528	0.0776463	1.26351	6.06333e-05	0.000881884	Alpha and turn propensities	Weights for coil at the window position of -3 (Qian-Sejnowski, 1988)
QIAN880131	-0.0145664	0.971656	0.836872	0.885717	0.0528617	0.932461	0.434835	0.532771	Alpha and turn propensities	Weights for coil at the window position of -2 (Qian-Sejnowski, 1988)
QIAN880132	0.001083	1.01994	0.73582	0.808659	0.0672496	0.960624	0.705668	0.777091	Alpha and turn propensities	Weights for coil at the window position of -1 (Qian-Sejnowski, 1988)
QIAN880133	-0.00951995	0.895623	0.329685	0.424997	0.034313	0.903547	0.346136	0.445792	Alpha and turn propensities	Weights for coil at the window position of 0 (Qian-Sejnowski, 1988)
QIAN880134	-0.0476099	0.861635	0.135779	0.211039	-0.00478919	0.853335	0.0922757	0.158854	Alpha and turn propensities	Weights for coil at the window position of 1 (Qian-Sejnowski, 1988)
QIAN880135	-0.0481859	0.875256	0.129873	0.203605	-0.0184168	0.872648	0.100955	0.171623	Alpha and turn propensities	Weights for coil at the window position of 2 (Qian-Sejnowski, 1988)
QIAN880136	-0.00435874	0.884471	0.290759	0.387679	0.00459667	0.916671	0.459845	0.554669	Alpha and turn propensities	Weights for coil at the window position of 3 (Qian-Sejnowski, 1988)
QIAN880137	-0.0424709	0.84186	0.0614229	0.107096	-0.0161294	0.790495	0.00723158	0.0219776	Alpha and turn propensities	Weights for coil at the window position of 4 (Qian-Sejnowski, 1988)
QIAN880138	0.00691088	1.01322	0.608456	0.699788	0.0528584	1.00468	0.694348	0.767734	Alpha and turn propensities	Weights for coil at the window position of 5 (Qian-Sejnowski, 1988)
QIAN880139	0.0571441	0.94781	0.669201	0.753717	0.0280733	0.998073	0.785982	0.843342	Alpha and turn propensities	Weights for coil at the window position of 6 (Qian-Sejnowski, 1988)
RACS770101	-0.0149725	0.737478	0.00117159	0.00574186	-0.0218851	0.706815	0.00014992	0.00131543	Hydrophobicity	Average reduced distance for C-alpha (Rackovsky-Scheraga, 1977)
RACS770102	-0.0306291	0.755433	0.00390578	0.012723	-0.0192685	0.713587	0.000413297	0.00270884	Hydrophobicity	Average reduced distance for side chain (Rackovsky-Scheraga, 1977)
RACS770103	-0.0436814	0.715031	0.000972265	0.00513507	-0.0230857	0.764501	0.00494477	0.0157307	Hydrophobicity	Side chain orientational preference (Rackovsky-Scheraga, 1977)
RACS820101	-0.042893	0.840736	0.043371	0.0842636	-0.0577168	0.806517	0.00908202	0.0258671	Hydrophobicity	Average relative fractional occurrence in A0(i) (Rackovsky-Scheraga, 1982)
RACS820102	-0.182659	1.09428	0.105407	0.170153	-0.210513	1.0335	0.432657	0.531956	Other properties	Average relative fractional occurrence in AR(i) (Rackovsky-Scheraga, 1982)
RACS820103	-0.00929113	0.908743	0.278195	0.375529	0.0393718	0.967872	0.774029	0.83546	Hydrophobicity	Average relative fractional occurrence in AL(i) (Rackovsky-Scheraga, 1982)
RACS820104	-0.00287446	1.58243	5.29773e-12	2.88196e-09	0.0472567	1.4753	7.86036e-10	4.27604e-07	Alpha and turn propensities	Average relative fractional occurrence in EL(i) (Rackovsky-Scheraga, 1982)
RACS820105	0.0585791	0.739548	0.000501195	0.0030983	0.0256707	0.782918	0.00226135	0.00866318	Composition	Average relative fractional occurrence in E0(i) (Rackovsky-Scheraga, 1982)
RACS820106	0.0667493	1.08195	0.19749	0.283841	0.113515	1.13012	0.0477427	0.0930898	Other properties	Average relative fractional occurrence in ER(i) (Rackovsky-Scheraga, 1982)
RACS820107	0.147192	1.42822	5.93255e-09	1.61365e-06	0.205799	1.36495	1.20572e-07	1.63977e-05	Other properties	Average relative fractional occurrence in A0(i-1) (Rackovsky-Scheraga, 1982)
RACS820108	-0.0102569	1.20351	0.00475926	0.0148795	-0.0570124	1.06147	0.279957	0.375115	Alpha and turn propensities	Average relative fractional occurrence in AR(i-1) (Rackovsky-Scheraga, 1982)
RACS820109	0.112802	1.00153	0.861818	0.899558	0.146102	1.10816	0.164392	0.247727	Other properties	Average relative fractional occurrence in AL(i-1) (Rackovsky-Scheraga, 1982)
RACS820110	-0.03849	0.921459	0.402689	0.501288	0.0211002	0.894582	0.208034	0.293187	Alpha and turn propensities	Average relative fractional occurrence in EL(i-1) (Rackovsky-Scheraga, 1982)
RACS820111	-0.00569995	0.902274	0.280808	0.377184	-0.00488331	0.912542	0.312206	0.409253	Beta propensity	Average relative fractional occurrence in E0(i-1) (Rackovsky-Scheraga, 1982)
RACS820112	0.0980968	0.899994	0.336385	0.430573	0.0835003	0.961313	0.815281	0.859521	Alpha and turn propensities	Average relative fractional occurrence in ER(i-1) (Rackovsky-Scheraga, 1982)
RACS820113	0.0931739	1.33169	9.03706e-05	0.00124636	0.129167	1.2486	0.00158224	0.00672452	Other properties	Value of theta(i) (Rackovsky-Scheraga, 1982)
RACS820114	0.0145646	1.09593	0.178902	0.262325	0.0330405	1.06793	0.300077	0.396877	Alpha and turn propensities	Value of theta(i-1) (Rackovsky-Scheraga, 1982)
RADA880101	0.0618695	0.856361	0.147049	0.224705	0.0229478	0.785414	0.0165144	0.0410201	Hydrophobicity	Transfer free energy from chx to wat (Radzicka-Wolfenden, 1988)
RADA880102	0.0561667	0.815747	0.00980094	0.0250315	0.0481735	0.754685	0.000261128	0.00193168	Hydrophobicity	Transfer free energy from oct to wat (Radzicka-Wolfenden, 1988)
RADA880103	-0.039894	0.751522	0.00548981	0.0163194	-0.039894	0.81863	0.0354196	0.0738743	Physicochemical properties	Transfer free energy from vap to chx (Radzicka-Wolfenden, 1988)
RADA880104	0.0716393	0.816113	0.0506635	0.0939465	0.0504143	0.803879	0.0272706	0.0610503	Hydrophobicity	Transfer free energy from chx to oct (Radzicka-Wolfenden, 1988)
RADA880105	0.0640096	0.832351	0.0350349	0.0706247	0.0547442	0.832798	0.0264196	0.0598845	Hydrophobicity	Transfer free energy from vap to oct (Radzicka-Wolfenden, 1988)
RADA880106	0.00203481	0.849413	0.103363	0.167849	-0.0108081	0.853846	0.0945185	0.161692	Physicochemical properties	Accessible surface area (Radzicka-Wolfenden, 1988)
RADA880107	0.0695137	0.783417	0.0210226	0.0478506	0.045056	0.743337	0.00390726	0.0133682	Hydrophobicity	Energy transfer from out to in(95%buried) (Radzicka-Wolfenden, 1988)
RADA880108	0.0670439	0.711227	0.000645155	0.00369436	0.0597331	0.676959	6.87853e-05	0.000881884	Hydrophobicity	Mean polarity (Radzicka-Wolfenden, 1988)
RICJ880101	0.053351	0.998474	0.851265	0.893992	0.062656	1.08619	0.170044	0.254132	Other properties	Relative preference value at N" (Richardson-Richardson, 1988)
RICJ880102	0.053351	0.998474	0.850136	0.893992	0.062656	1.08619	0.170825	0.254599	Other properties	Relative preference value at N' (Richardson-Richardson, 1988)
RICJ880103	0.0740097	0.95687	0.629964	0.721001	0.0899826	1.00607	0.818222	0.860953	Other properties	Relative preference value at N-cap (Richardson-Richardson, 1988)
RICJ880104	0.0341413	0.864482	0.194766	0.281789	-0.0376514	0.968274	0.778053	0.836484	Hydrophobicity	Relative preference value at N1 (Richardson-Richardson, 1988)
RICJ880105	0.0392557	1.13469	0.0897084	0.149697	0.0605912	1.03631	0.565593	0.654644	Hydrophobicity	Relative preference value at N2 (Richardson-Richardson, 1988)
RICJ880106	0.0239189	0.986271	0.956836	0.968404	0.00343444	0.875501	0.268618	0.369945	Hydrophobicity	Relative preference value at N3 (Richardson-Richardson, 1988)
RICJ880107	-0.0043713	1.01659	0.708472	0.786982	-0.0487108	1.03099	0.568559	0.656267	Alpha and turn propensities	Relative preference value at N4 (Richardson-Richardson, 1988)
RICJ880108	-0.0564656	0.977509	0.871895	0.90367	-0.0295963	0.973574	0.806934	0.855696	Hydrophobicity	Relative preference value at N5 (Richardson-Richardson, 1988)
RICJ880109	0.00213205	1.31549	3.11588e-06	0.000188264	-0.046062	1.22127	0.000504428	0.00315412	Alpha and turn propensities	Relative preference value at Mid (Richardson-Richardson, 1988)
RICJ880110	-0.0691028	1.30764	4.69487e-06	0.000232183	-0.108339	1.21692	0.000666551	0.00355494	Alpha and turn propensities	Relative preference value at C5 (Richardson-Richardson, 1988)
RICJ880111	0.00484048	0.8957	0.166618	0.24833	0.000650224	0.866037	0.0517468	0.0998236	Hydrophobicity	Relative preference value at C4 (Richardson-Richardson, 1988)
RICJ880112	-0.0462315	1.04231	0.496488	0.598868	-0.0647639	0.993201	0.973972	0.979373	Alpha and turn propensities	Relative preference value at C3 (Richardson-Richardson, 1988)
RICJ880113	-0.111675	0.925619	0.409268	0.508315	-0.0991748	0.85313	0.072703	0.131835	Alpha and turn propensities	Relative preference value at C2 (Richardson-Richardson, 1988)
RICJ880114	-0.0125429	0.850796	0.0947405	0.156178	-0.00756783	0.98369	0.9938	0.9938	Alpha and turn propensities	Relative preference value at C1 (Richardson-Richardson, 1988)
RICJ880115	-0.0162229	0.965734	0.793306	0.847856	0.0523073	1.03304	0.584725	0.669664	Other properties	Relative preference value at C-cap (Richardson-Richardson, 1988)
RICJ880116	-0.128179	0.866222	0.164585	0.246651	-0.0846233	0.85425	0.103456	0.173836	Alpha and turn propensities	Relative preference value at C' (Richardson-Richardson, 1988)
RICJ880117	0.116849	0.985751	0.959503	0.968404	0.103887	0.969348	0.814701	0.859521	Alpha and turn propensities	Relative preference value at C" (Richardson-Richardson, 1988)
ROBB760101	-0.0466771	1.29766	0.000174709	0.00176003	-0.0864268	1.19195	0.00973493	0.027158	Alpha and turn propensities	Information measure for alpha-helix (Robson-Suzuki, 1976)
ROBB760102	0.0464069	0.909977	0.3265	0.422895	0.018297	0.91055	0.289676	0.385291	Hydrophobicity	Information measure for N-terminal helix (Robson-Suzuki, 1976)
ROBB760103	-0.0124988	1.23763	0.00232475	0.00903332	-0.0358834	1.12853	0.0763355	0.136153	Alpha and turn propensities	Information measure for middle helix (Robson-Suzuki, 1976)
ROBB760104	0.0304924	0.864471	0.158429	0.24007	0.0343881	0.805782	0.0287963	0.0642015	Alpha and turn propensities	Information measure for C-terminal helix (Robson-Suzuki, 1976)
ROBB760105	0.0619433	0.810552	0.0227709	0.0509769	0.0396436	0.815395	0.0200692	0.0477188	Beta propensity	Information measure for extended (Robson-Suzuki, 1976)
ROBB760106	0.0286612	0.742095	0.00324025	0.0110169	0.0286612	0.746556	0.00271513	0.010069	Beta propensity	Information measure for pleated-sheet (Robson-Suzuki, 1976)
ROBB760107	0.0143683	1.17327	0.0129056	0.0321111	0.0165302	1.1672	0.0132679	0.0345346	Alpha and turn propensities	Information measure for extended without H-bond (Robson-Suzuki, 1976)
ROBB760108	-0.0214637	1.27181	7.2007e-05	0.00118703	0.13243	1.20971	0.00110043	0.0049474	Alpha and turn propensities	Information measure for turn (Robson-Suzuki, 1976)
ROBB760109	0.0303471	1.05936	0.303579	0.397945	0.0387799	1.05243	0.335328	0.435367	Alpha and turn propensities	Information measure for N-terminal turn (Robson-Suzuki, 1976)
ROBB760110	-0.0117862	1.25548	0.000208691	0.00190479	0.109462	1.21426	0.00085557	0.00415563	Alpha and turn propensities	Information measure for middle turn (Robson-Suzuki, 1976)
ROBB760111	0.0750236	1.2296	0.0013674	0.00637282	0.0923992	1.26311	0.000122739	0.00123648	Alpha and turn propensities	Information measure for C-terminal turn (Robson-Suzuki, 1976)
ROBB760112	0.0176087	1.0026	0.858183	0.897792	0.0207739	0.975981	0.85599	0.892066	Alpha and turn propensities	Information measure for coil (Robson-Suzuki, 1976)
ROBB760113	-0.0228191	1.21571	0.0015605	0.00692592	0.118717	1.2091	0.00123877	0.00543459	Alpha and turn propensities	Information measure for loop (Robson-Suzuki, 1976)
ROBB790101	0.0597055	0.756329	0.00183893	0.00769069	0.0597055	0.724011	0.000195639	0.00156511	Hydrophobicity	Hydration free energy (Robson-Osguthorpe, 1979)
ROSG850101	0.042004	0.747755	0.00301854	0.0104591	0.0209759	0.767188	0.00444914	0.0145803	Physicochemical properties	Mean area buried on transfer (Rose et al., 1985)
ROSG850102	0.0633352	0.664697	5.31001e-05	0.000996084	0.0613402	0.668465	3.02574e-05	0.00057676	Hydrophobicity	Mean fractional area loss (Rose et al., 1985)
ROSM880101	-0.0433438	0.876482	0.200666	0.286515	-0.00435028	0.77987	0.0132284	0.0345346	Hydrophobicity	Side chain hydropathy, uncorrected for solvation (Roseman, 1988)
ROSM880102	-0.0391607	0.776172	0.0130049	0.0321576	-0.00373247	0.729271	0.00148731	0.00637084	Hydrophobicity	Side chain hydropathy, corrected for solvation (Roseman, 1988)
ROSM880103	0.0699677	0.971917	0.943418	0.962889	0.00537123	1.01803	0.569408	0.656267	Hydrophobicity	Loss of Side chain hydropathy by helix formation (Roseman, 1988)
SIMZ760101	0.0035574	0.77215	0.00273754	0.00991302	-0.0255172	0.753077	0.000580802	0.00336124	Hydrophobicity	Transfer free energy (Simon, 1976), Cited by Charton-Charton (1982)
SNEP660101	-0.0363501	1.06981	0.268783	0.365545	-0.110147	1.10284	0.118671	0.19445	Alpha and turn propensities	Principal component I (Sneath, 1966)
SNEP660102	-0.0108439	0.913101	0.333755	0.428214	-0.0193959	0.848472	0.0579396	0.109823	Hydrophobicity	Principal component II (Sneath, 1966)
SNEP660103	0.0603473	0.847631	0.0300354	0.063086	0.0534117	0.861532	0.0379749	0.0779559	Physicochemical properties	Principal component III (Sneath, 1966)
SNEP660104	0.0871418	1.02278	0.63401	0.723064	0.0838108	1.07269	0.2453	0.341287	Alpha and turn propensities	Principal component IV (Sneath, 1966)
SUEM840101	-0.0466113	1.07285	0.271932	0.368906	-0.10355	1.01184	0.716358	0.782527	Alpha and turn propensities	Zimm-Bragg parameter s at 20 C (Sueki et al., 1984)
SUEM840102	0.052351	0.846354	0.0734093	0.124796	-0.0243818	0.812155	0.0186953	0.0450012	Hydrophobicity	Zimm-Bragg parameter sigma x 1.0E4 (Sueki et al., 1984)
SWER830101	0.043846	0.828591	0.0357954	0.0718549	0.043846	0.751125	0.00109513	0.0049474	Hydrophobicity	Optimal matching hydrophobicity (Sweet-Eisenberg, 1983)
TANS770101	-0.0702616	1.24823	0.00109668	0.00557563	-0.101167	1.14746	0.0371355	0.0765216	Alpha and turn propensities	Normalized frequency of alpha-helix (Tanaka-Scheraga, 1977)
TANS770102	-0.0423673	1.02121	0.552747	0.646655	-0.0581457	1.08056	0.145422	0.226675	Alpha and turn propensities	Normalized frequency of isolated helix (Tanaka-Scheraga, 1977)
TANS770103	0.0335513	1.03721	0.499114	0.600704	0.0122753	0.904972	0.365128	0.467364	Beta propensity	Normalized frequency of extended structure (Tanaka-Scheraga, 1977)
TANS770104	-0.0751502	0.790887	0.0315245	0.0654555	-0.0663008	0.776548	0.016246	0.0409158	Alpha and turn propensities	Normalized frequency of chain reversal R (Tanaka-Scheraga, 1977)
TANS770105	0.183551	1.18979	0.00482552	0.0150005	0.230447	1.14446	0.0144209	0.0370047	Other properties	Normalized frequency of chain reversal S (Tanaka-Scheraga, 1977)
TANS770106	0.0480326	0.848131	0.0523108	0.095815	0.0712239	0.913604	0.27841	0.373963	Hydrophobicity	Normalized frequency of chain reversal D (Tanaka-Scheraga, 1977)
TANS770107	0.0943465	1.138	0.0815772	0.137454	0.194332	1.23728	0.00313036	0.0112776	Other properties	Normalized frequency of left-handed helix (Tanaka-Scheraga, 1977)
TANS770108	-0.0356815	0.982651	0.97249	0.974281	0.013766	1.07088	0.202889	0.289689	Hydrophobicity	Normalized frequency of zeta R (Tanaka-Scheraga, 1977)
TANS770109	0.072986	0.9122	0.353092	0.447743	0.106656	1.07691	0.201248	0.288492	Other properties	Normalized frequency of coil (Tanaka-Scheraga, 1977)
TANS770110	0.0109075	0.980003	0.905047	0.928953	0.0658166	0.956443	0.642051	0.720157	Alpha and turn propensities	Normalized frequency of chain reversal (Tanaka-Scheraga, 1977)
VASM830101	-0.0137519	0.99564	0.849778	0.893992	-0.00695345	1.00305	0.801294	0.852029	Alpha and turn propensities	Relative population of conformational state A (Vasquez et al., 1983)
VASM830102	-0.0470872	0.963821	0.725808	0.801574	-0.0574407	0.981405	0.913638	0.930206	Hydrophobicity	Relative population of conformational state C (Vasquez et al., 1983)
VASM830103	0.0741597	0.978009	0.875431	0.90367	0.0629758	0.941598	0.404204	0.506652	Hydrophobicity	Relative population of conformational state E (Vasquez et al., 1983)
VELV850101	0.0274193	0.977522	0.863179	0.899558	0.0320426	1.04623	0.430255	0.531082	Hydrophobicity	Electron-ion interaction potential (Veljkovic et al., 1985)
VENT840101	0.0304998	0.761834	0.00246585	0.00938057	0.0207302	0.768126	0.00187948	0.00735566	Hydrophobicity	Bitterness (Venanzi, 1984)
VHEG790101	-0.0735535	0.934561	0.46645	0.571506	-0.00118775	0.889973	0.178529	0.263197	Hydrophobicity	Transfer free energy to lipophilic phase (von Heijne-Blomberg, 1979)
WARP780101	-0.00231479	0.837603	0.0425611	0.0829866	-0.0264278	0.797337	0.00790174	0.0231888	Hydrophobicity	Average interactions per side chain atom (Warme-Morgan, 1978)
WEBA780101	-0.143799	0.763147	0.00159788	0.00695397	-0.0843796	0.795039	0.00406117	0.0136375	Physicochemical properties	RF value in high salt chromatography (Weber-Lacey, 1978)
WERD780101	0.067909	0.716082	0.000249499	0.0020554	0.0501328	0.709708	8.06437e-05	0.000914832	Hydrophobicity	Propensity to be buried inside (Wertz-Scheraga, 1978)
WERD780102	0.119232	0.942238	0.549847	0.644649	0.129124	0.942502	0.517203	0.610322	Other properties	Free energy change of epsilon(i) to epsilon(ex) (Wertz-Scheraga, 1978)
WERD780103	0.126046	0.982005	0.972142	0.974281	0.0796115	1.04111	0.452863	0.54868	Hydrophobicity	Free energy change of alpha(Ri) to alpha(Rh) (Wertz-Scheraga, 1978)
WERD780104	0.0435514	0.860292	0.0984932	0.161386	0.0435514	0.846352	0.0578324	0.109823	Hydrophobicity	Free energy change of epsilon(i) to alpha(Rh) (Wertz-Scheraga, 1978)
WOEC730101	-0.012012	0.887322	0.259864	0.358797	0.00366946	0.817875	0.0417086	0.0843475	Hydrophobicity	Polar requirement (Woese, 1973)
WOLR810101	0.0553339	0.854595	0.0688784	0.11783	0.0159305	0.835961	0.0289337	0.0642447	Hydrophobicity	Hydration potential (Wolfenden et al., 1981)
WOLS870101	0.010973	0.841267	0.0447489	0.0860191	0.0315616	0.81449	0.0120904	0.0320899	Hydrophobicity	Principal property value z1 (Wold et al., 1987)
WOLS870102	-0.0294821	0.853832	0.0888183	0.148668	-0.0167567	0.88582	0.187913	0.273329	Physicochemical properties	Principal property value z2 (Wold et al., 1987)
WOLS870103	0.12824	1.08271	0.325109	0.422098	0.12824	1.07739	0.285827	0.381103	Alpha and turn propensities	Principal property value z3 (Wold et al., 1987)
YUTK870101	0.0553232	0.786204	0.00331686	0.0112073	0.0344242	0.762603	0.000502408	0.00315412	Hydrophobicity	Unfolding Gibbs energy in water, pH7.0 (Yutani et al., 1987)
YUTK870102	0.0187793	0.982734	0.934769	0.957654	-0.0279142	0.879705	0.144253	0.226149	Hydrophobicity	Unfolding Gibbs energy in water, pH9.0 (Yutani et al., 1987)
YUTK870103	0.117752	0.867489	0.126119	0.198291	0.0743022	0.945318	0.577931	0.664682	Hydrophobicity	Activation Gibbs energy of unfolding, pH7.0 (Yutani et al., 1987)
YUTK870104	0.107925	0.883315	0.218099	0.307373	0.0811909	0.953451	0.693142	0.767734	Hydrophobicity	Activation Gibbs energy of unfolding, pH9.0 (Yutani et al., 1987)
ZASB820101	0.0602325	0.905653	0.29067	0.387679	0.0640665	0.892822	0.187389	0.273296	Physicochemical properties	Dependence of partition coefficient on ionic strength (Zaslavsky et al.,
ZIMJ680101	-0.0386279	0.824865	0.0251502	0.0551681	-0.020419	0.788026	0.00433802	0.0143023	Hydrophobicity	Hydrophobicity (Zimmerman et al., 1968)
ZIMJ680102	0.01668	0.852789	0.134319	0.20997	-0.0106472	0.90481	0.311389	0.409168	Physicochemical properties	Bulkiness (Zimmerman et al., 1968)
ZIMJ680103	-0.0579312	0.900485	0.3035	0.397945	-0.0265504	0.846608	0.0647751	0.119856	Hydrophobicity	Polarity (Zimmerman et al., 1968)
ZIMJ680104	-0.169281	0.82811	0.0649738	0.112209	-0.114264	0.896875	0.273981	0.371424	Hydrophobicity	Isoelectric point (Zimmerman et al., 1968)
ZIMJ680105	-0.0515953	0.956314	0.666207	0.751902	-0.0740284	0.908587	0.26134	0.361753	Hydrophobicity	RF rank (Zimmerman et al., 1968)
AURR980101	-0.104747	0.930591	0.513725	0.611524	-0.110156	0.920714	0.406218	0.508006	Undefined	Normalized positional residue frequency at helix termini N4'(Aurora-Rose,
AURR980102	-0.135885	0.811968	0.0560614	0.0999914	-0.0895952	0.978348	0.900281	0.924062	Undefined	Normalized positional residue frequency at helix termini N"' (Aurora-Rose,
AURR980103	-0.0338594	1.057	0.41448	0.512448	-0.0518258	1.12794	0.083204	0.146958	Undefined	Normalized positional residue frequency at helix termini N" (Aurora-Rose,
AURR980104	-0.0176307	0.825204	0.0495443	0.092619	-0.0231437	0.869537	0.135564	0.215633	Undefined	Normalized positional residue frequency at helix termini N'(Aurora-Rose,
AURR980105	0.00877695	0.901295	0.265618	0.363426	-0.00678821	0.930997	0.442605	0.539859	Undefined	Normalized positional residue frequency at helix termini Nc (Aurora-Rose,
AURR980106	-0.112835	0.903214	0.316774	0.41325	-0.125893	0.901159	0.273613	0.371424	Undefined	Normalized positional residue frequency at helix termini N1 (Aurora-Rose,
AURR980107	-0.0476381	1.14171	0.1003	0.163854	-0.0979875	1.04498	0.493847	0.589151	Undefined	Normalized positional residue frequency at helix termini N2 (Aurora-Rose,
AURR980108	-0.0530417	1.27082	0.000115255	0.00147632	-0.101234	1.13639	0.0349203	0.0733461	Undefined	Normalized positional residue frequency at helix termini N3 (Aurora-Rose,
AURR980109	-0.0386213	1.21546	0.00133768	0.00636508	-0.106053	1.08483	0.14247	0.223999	Undefined	Normalized positional residue frequency at helix termini N4 (Aurora-Rose,
AURR980110	-0.0882472	1.27268	8.47547e-05	0.00124612	-0.093429	1.13916	0.0239221	0.0549097	Undefined	Normalized positional residue frequency at helix termini N5 (Aurora-Rose,
AURR980111	-0.080449	1.32973	2.85757e-05	0.000575748	-0.125746	1.18697	0.0095811	0.0270058	Undefined	Normalized positional residue frequency at helix termini C5 (Aurora-Rose,
AURR980112	-0.0786082	1.25669	0.000268928	0.00212025	-0.113112	1.15786	0.0104138	0.0289035	Undefined	Normalized positional residue frequency at helix termini C4 (Aurora-Rose,
AURR980113	-0.0264605	1.25329	0.000761445	0.00414226	-0.0928916	1.18952	0.00792851	0.0231888	Undefined	Normalized positional residue frequency at helix termini C3 (Aurora-Rose,
AURR980114	-0.0675316	1.08828	0.144584	0.222815	-0.0950205	1.03953	0.407795	0.508808	Undefined	Normalized positional residue frequency at helix termini C2 (Aurora-Rose,
AURR980115	-0.113715	1.29698	6.86195e-05	0.00116653	-0.129772	1.12769	0.0552691	0.105937	Undefined	Normalized positional residue frequency at helix termini C1 (Aurora-Rose,
AURR980116	-0.0744206	1.16254	0.0193437	0.0449699	-0.100891	1.08084	0.189116	0.274345	Undefined	Normalized positional residue frequency at helix termini Cc (Aurora-Rose,
AURR980117	0.00506704	0.937983	0.589313	0.68065	0.081932	1.08145	0.207879	0.293187	Undefined	Normalized positional residue frequency at helix termini C' (Aurora-Rose,
AURR980118	-0.0456438	0.964638	0.857118	0.897792	-0.0445276	0.936829	0.530326	0.621762	Undefined	Normalized positional residue frequency at helix termini C" (Aurora-Rose,
AURR980119	-0.133107	0.798238	0.0397948	0.078153	-0.113759	0.817418	0.0502404	0.0976099	Undefined	Normalized positional residue frequency at helix termini C"' (Aurora-Rose,
AURR980120	-0.0692885	0.835852	0.0638208	0.110569	-0.0306024	0.886351	0.181231	0.26574	Undefined	Normalized positional residue frequency at helix termini C4' (Aurora-Rose,
ONEK900101	0.00275689	1.0918	0.192037	0.279326	-0.0114201	1.07434	0.274153	0.371424	Undefined	Delta G values for the peptides extrapolated to 0 M urea (O'Neil-DeGrado,
ONEK900102	-0.0146677	1.01971	0.685053	0.766809	-0.0231483	0.982319	0.935583	0.944262	Undefined	Helix formation parameters (delta delta G) (O'Neil-DeGrado, 1990)
BAEK050101	0.100488	0.688369	0.000326775	0.00229718	0.0912874	0.692912	0.000236108	0.00178393	Hydrophobicity	Linker index (Bae et al., 2005)
BASU050101	0.0422527	0.744667	0.00274377	0.00991302	0.0275218	0.66989	4.49e-05	0.00070196	Hydrophobicity	Interactivity scale obtained from the contact matrix (Bastolla et al., 2005)
BASU050102	0.0528253	0.673649	0.00030329	0.00226013	0.0477491	0.651079	4.49887e-05	0.00070196	Hydrophobicity	Interactivity scale obtained by maximizing the mean of correlation
BASU050103	0.0707719	0.702113	9.97675e-05	0.00132374	0.0623931	0.673415	6.39144e-06	0.000204526	Hydrophobicity	Interactivity scale obtained by maximizing the mean of correlation
MUNV940101	0.0343821	1.09814	0.161222	0.243624	0.0455961	0.998227	0.86937	0.902552	Undefined	Free energy in alpha-helical conformation (Munoz-Serrano, 1994)
MUNV940102	0.0437867	1.23602	0.00428246	0.0136237	0.0755993	1.09017	0.176771	0.261314	Undefined	Free energy in alpha-helical region (Munoz-Serrano, 1994)
CASG920101	0.0905601	0.683751	0.000425675	0.00272432	0.0939977	0.66914	0.000109818	0.00112719	Hydrophobicity	Hydrophobicity scale from native protein structures (Casari-Sippl, 1992)
MUNV940104	-0.0599659	0.808114	0.0534182	0.0975151	-0.0503243	0.79791	0.0325754	0.0699174	Undefined	Free energy in beta-strand region (Munoz-Serrano, 1994)
MUNV940105	-0.0584865	0.841861	0.118348	0.188249	-0.0332004	0.864579	0.166936	0.250174	Undefined	Free energy in beta-strand region (Munoz-Serrano, 1994)
WIMW960101	0.0805812	0.894854	0.252761	0.35077	0.0801871	0.811604	0.0194334	0.0465718	Undefined	Free energies of transfer of AcWl-X-LL peptides from bilayer interface to
KIMC930101	-0.0475182	0.789862	0.0225957	0.0507937	0.00652313	0.833364	0.064699	0.119856	Undefined	Thermodynamic beta sheet propensity (Kim-Berg, 1993)
MONM990101	-0.0732045	0.868582	0.164543	0.246651	-0.011295	0.759169	0.00367628	0.0129026	Undefined	Turn propensity scale for transmembrane helices (Monne et al., 1999)
BLAM930101	0.0276206	1.00649	0.778446	0.843459	0.0166391	0.956963	0.711942	0.779268	Undefined	Alpha helix propensity of position 44 in T4 lysozyme (Blaber et al., 1993)
CEDJ970102	-0.108198	1.26683	4.06235e-05	0.000789257	-0.108109	1.24683	7.3054e-05	0.000886372	Undefined	Composition of amino acids in anchored proteins (percent) (Cedano et al.,
PARS000102	-0.0973242	0.8706	0.196698	0.283829	-0.0973242	0.781418	0.0148767	0.0379949	Undefined	p-Values of thermophilic proteins based on the distributions of B values
KUMS000101	-0.011751	1.14513	0.0340077	0.0695497	-0.0228037	1.18891	0.00488511	0.0157249	Undefined	Distribution of amino acid residues in the 18 non-redundant families of
CEDJ970103	-0.0717987	1.2686	0.000241306	0.00201955	-0.0805944	1.25622	0.000176711	0.00145653	Undefined	Composition of amino acids in membrane proteins (percent) (Cedano et al.,
CEDJ970104	-0.119393	1.23173	0.00104967	0.00543829	-0.118799	1.24538	0.000332313	0.00225973	Undefined	Composition of amino acids in intracellular proteins (percent) (Cedano et
CORJ870101	0.0819632	0.72215	0.000329375	0.00229718	0.0841874	0.660243	3.69441e-06	0.00012561	Hydrophobicity	NNEIG index (Cornette et al., 1987)
TAKK010101	0.0235722	0.821702	0.0273646	0.0586076	-0.0211356	0.856841	0.0630725	0.117909	Undefined	Side-chain contribution to protein stability (kJ/mol) (Takano-Yutani, 2001)
FODM020101	0.0901544	0.715281	0.00210047	0.00842003	0.0805497	0.71545	0.00132907	0.0057841	Undefined	Propensity of amino acids within pi-helices (Fodje-Al-Karadaghi, 2002)
CORJ870102	0.0444322	0.834295	0.0400727	0.0784156	0.043481	0.749403	0.00082976	0.00410354	Hydrophobicity	SWEIG index (Cornette et al., 1987)
CORJ870103	0.0185813	0.750683	0.0022564	0.00883081	0.022067	0.728533	0.000525507	0.00324859	Hydrophobicity	PRIFT index (Cornette et al., 1987)
CORJ870107	0.0294378	0.724714	0.000697529	0.003872	-0.00596521	0.705774	0.000135669	0.0012707	Hydrophobicity	TOTFT index (Cornette et al., 1987)
CORJ870108	-0.0219014	0.747796	0.00375563	0.0124577	0.0018387	0.695324	0.000218783	0.0017249	Hydrophobicity	TOTLS index (Cornette et al., 1987)
COWR900101	0.0125	0.722981	0.000548936	0.0033553	-0.0126935	0.708262	0.000131004	0.0012707	Hydrophobicity	Hydrophobicity index, 3.0 pH (Cowan-Whittaker, 1990)
NADH010106	0.140857	0.649004	0.000213995	0.00190479	0.134009	0.707055	0.00123251	0.00543459	Undefined	Hydropathy scale based on self-information values in the two-state model (36%
NADH010107	0.171124	0.879612	0.221351	0.310347	0.181417	0.89604	0.278278	0.373963	Undefined	Hydropathy scale based on self-information values in the two-state model (50%
MONM990201	0.0322718	0.915302	0.371957	0.467308	0.062045	0.902078	0.270611	0.370394	Undefined	Averaged turn propensities in a transmembrane helix (Monne et al., 1999)
KOEP990101	0.141451	1.14112	0.038223	0.0758775	0.179746	1.12442	0.0463108	0.0912792	Undefined	Alpha-helix propensity derived from designed sequences (Koehl-Levitt, 1999)
FASG890101	-0.0807937	0.70644	0.000132416	0.00153264	-0.0789716	0.692061	3.07464e-05	0.00057676	Hydrophobicity	Hydrophobicity index (Fasman, 1989)
CEDJ970101	-0.0624425	1.17667	0.00545432	0.016303	-0.078246	1.15304	0.010806	0.0296172	Undefined	Composition of amino acids in extracellular proteins (percent) (Cedano et
FUKS010109	-0.0887627	1.15637	0.00776887	0.0212094	-0.115631	1.19739	0.000645421	0.00352108	Undefined	Entire chain composition of amino acids in intracellular proteins of
FUKS010110	-0.0902586	1.33262	3.42516e-07	4.18806e-05	-0.110499	1.36248	8.10043e-09	2.20332e-06	Undefined	Entire chain composition of amino acids in intracellular proteins of
FUKS010112	-0.0952773	1.26136	0.000196042	0.00185762	-0.147673	1.26495	0.000100293	0.00106979	Undefined	Entire chain compositino of amino acids in nuclear proteins (percent)
CEDJ970105	-0.214703	0.906677	0.290482	0.387679	-0.182541	1.01779	0.700595	0.77307	Undefined	Composition of amino acids in nuclear proteins (percent) (Cedano et al.,
FUKS010101	-0.113862	0.816621	0.0444503	0.0858149	-0.0746744	0.817326	0.0354434	0.0738743	Undefined	Surface composition of amino acids in intracellular proteins of thermophiles
FUKS010102	-0.1071	0.89703	0.342583	0.436453	-0.0905986	0.848477	0.116332	0.192354	Undefined	Surface composition of amino acids in intracellular proteins of mesophiles
FUKS010103	-0.0375715	0.732321	0.00062731	0.00363039	-0.0340823	0.809072	0.0124979	0.0330041	Undefined	Surface composition of amino acids in extracellular proteins of mesophiles
FUKS010104	-0.120896	0.788495	0.0350527	0.0706247	-0.103553	0.757478	0.00927786	0.0262873	Undefined	Surface composition of amino acids in nuclear proteins (percent)
FUKS010105	-0.0120947	1.18115	0.00912406	0.0236357	-0.0545635	1.18374	0.0055607	0.0173852	Undefined	Interior composition of amino acids in intracellular proteins of thermophiles
FUKS010106	-0.020804	1.19303	0.00320976	0.0109818	-0.0697862	1.19783	0.00168117	0.00698134	Undefined	Interior composition of amino acids in intracellular proteins of mesophiles
FUKS010107	0.00263352	1.12193	0.0624248	0.108496	-0.0329337	1.13618	0.0325519	0.0699174	Undefined	Interior composition of amino acids in extracellular proteins of mesophiles
FUKS010108	-0.0622873	1.15829	0.0258167	0.0561771	-0.100727	1.0948	0.133084	0.212309	Undefined	Interior composition of amino acids in nuclear proteins (percent)
GEOR030104	-0.0984533	1.28324	0.000131824	0.00153264	-0.154897	1.22678	0.00105866	0.00485281	Alpha and turn propensities	Linker propensity from 3-linker dataset (George-Heringa, 2003)
GUYH850102	-0.0521947	0.711474	0.000322723	0.00229718	-0.0429396	0.71094	0.000166132	0.00141212	Hydrophobicity	Apparent partition energies calculated from Wertz-Scheraga index (Guy, 1985)
FUKS010111	0.00560996	1.02168	0.680829	0.763652	-0.0458066	1.06466	0.29565	0.392278	Undefined	Entire chain composition of amino acids in extracellular proteins of
GUYH850103	-0.0580244	0.730778	0.0015564	0.00692592	-0.0541598	0.699372	0.000145477	0.00129737	Hydrophobicity	Apparent partition energies calculated from Robson-Osguthorpe index (Guy,
AVBF000101	0.0274751	0.779538	0.0162203	0.0392171	0.020026	0.833988	0.0634547	0.118217	Undefined	Screening coefficients gamma, local (Avbelj, 2000)
AVBF000102	0.0173479	0.936544	0.556745	0.648543	-0.035953	0.916756	0.381069	0.484624	Undefined	Screening coefficients gamma, non-local (Avbelj, 2000)
AVBF000103	0.0421398	1.10249	0.136991	0.211714	-0.00384021	0.982679	0.948568	0.955594	Undefined	Slopes tripeptide, FDPB VFF neutral (Avbelj, 2000)
AVBF000104	-0.0319391	1.0779	0.312489	0.40864	-0.0345998	0.98283	0.908454	0.927202	Undefined	Slopes tripeptides, LD VFF neutral (Avbelj, 2000)
AVBF000105	0.064001	1.03555	0.531478	0.62853	-0.00520844	0.948394	0.582745	0.668804	Undefined	Slopes tripeptide, FDPB VFF noside (Avbelj, 2000)
AVBF000106	0.0746994	0.901669	0.299173	0.395024	0.0388568	0.883468	0.175032	0.259449	Undefined	Slopes tripeptide FDPB VFF all (Avbelj, 2000)
AVBF000107	-0.0325058	1.0041	0.81431	0.865204	-0.0255734	0.977768	0.85872	0.8932	Undefined	Slopes tripeptide FDPB PARSE neutral (Avbelj, 2000)
AVBF000108	-0.00872434	0.980026	0.990124	0.990124	-0.0461925	0.900291	0.320672	0.418335	Undefined	Slopes dekapeptide, FDPB VFF neutral (Avbelj, 2000)
AVBF000109	-0.0550085	0.898201	0.22969	0.320388	-0.0914639	0.888584	0.166694	0.250174	Undefined	Slopes proteins, FDPB VFF neutral (Avbelj, 2000)
YANJ020101	0.0264097	0.930126	0.48867	0.590748	0.0456761	0.94978	0.609797	0.68681	Undefined	Side-chain conformation by gaussian evolutionary method (Yang et al., 2002)
MITS020101	0.0647482	0.920637	0.3603	0.454764	0.0824955	0.940819	0.526302	0.618376	Undefined	Amphiphilicity index (Mitaku et al., 2002)
TSAJ990101	-0.0349361	0.860443	0.0521055	0.0957615	-0.0376895	0.892197	0.119762	0.195648	Undefined	Volumes including the crystallographic waters using the ProtOr (Tsai et al.,
TSAJ990102	-0.0315276	0.846367	0.0292688	0.0617141	-0.0343528	0.898566	0.138868	0.219605	Undefined	Volumes not including the crystallographic waters using the ProtOr (Tsai et
COSI940101	0.0276364	0.977646	0.867567	0.902403	0.0321141	1.04588	0.430528	0.531082	Undefined	Electron-ion interaction potential values (Cosic, 1994)
GUYH850104	-0.0634585	0.722577	0.00134556	0.00636508	-0.0376671	0.722134	0.000810944	0.00408475	Hydrophobicity	Apparent partition energies calculated from Janin index (Guy, 1985)
WILM950101	0.0288501	0.815403	0.0277418	0.0589512	0.00781667	0.810654	0.0174244	0.0424826	Undefined	Hydrophobicity coefficient in RP-HPLC, C18 with 0.1%TFA/MeCN/H2O (Wilce et
WILM950102	0.0185112	0.807728	0.0245497	0.054069	-0.0126194	0.868516	0.117681	0.193409	Undefined	Hydrophobicity coefficient in RP-HPLC, C8 with 0.1%TFA/MeCN/H2O (Wilce et al.
WILM950103	0.0827235	1.23081	0.00173381	0.0073687	0.0590217	1.21901	0.00185487	0.00735566	Undefined	Hydrophobicity coefficient in RP-HPLC, C4 with 0.1%TFA/MeCN/H2O (Wilce et al.
WILM950104	0	1.01034	0.735716	0.808659	0.00166499	1.01129	0.734183	0.800392	Undefined	Hydrophobicity coefficient in RP-HPLC, C18 with 0.1%TFA/2-PrOH/MeCN/H2O
JURD980101	0.0563867	0.850622	0.0560324	0.0999914	0.0328982	0.742236	0.000453186	0.00293492	Hydrophobicity	Modified Kyte-Doolittle hydrophobicity scale (Juretic et al., 1998)
GUOD860101	0.0184386	0.799657	0.01646	0.039446	-0.0166413	0.788434	0.00733758	0.0219939	Undefined	Retention coefficient at pH 2 (Guo et al., 1986)
KOEP990102	-0.105474	0.730086	0.000230393	0.00195834	-0.104355	0.76538	0.000823284	0.00410354	Hydrophobicity	Beta-sheet propensity derived from designed sequences (Koehl-Levitt, 1999)
KUHL950101	-0.0773658	0.871388	0.175156	0.258224	-0.0470514	0.72769	0.00106155	0.00485281	Hydrophobicity	Hydrophilicity scale (Kuhn et al., 1995)
KUMS000102	0	1.14716	0.0212188	0.0480959	-0.0338235	1.23208	0.000223719	0.00173862	Undefined	Distribution of amino acid residues in the 18 non-redundant families of
KUMS000103	-0.0709398	1.35475	3.84932e-07	4.18806e-05	-0.122734	1.32349	1.12722e-06	6.13208e-05	Undefined	Distribution of amino acid residues in the alpha-helices in thermophilic
SUYM030101	0.106867	0.849308	0.104618	0.169381	0.0951068	0.842948	0.075587	0.135261	Undefined	Linker propensity index (Suyama-Ohara, 2003)
PUNT030101	-0.024829	0.828894	0.0546186	0.0983859	-0.00224914	0.802387	0.0164308	0.0410201	Undefined	Knowledge-based membrane-propensity scale from 1D_Helix in MPtopo databases
KUMS000104	-0.0417955	1.35157	8.82183e-07	7.99846e-05	-0.127936	1.29119	1.42461e-05	0.000352268	Undefined	Distribution of amino acid residues in the alpha-helices in mesophilic
GEOR030101	-0.105696	1.02489	0.526125	0.623556	-0.121572	1.026	0.458187	0.553897	Undefined	Linker propensity from all dataset (George-Heringa, 2003)
GEOR030102	-0.0936597	0.904292	0.329386	0.424997	-0.110943	0.973329	0.921711	0.935468	Undefined	Linker propensity from 1-linker dataset (George-Heringa, 2003)
GEOR030103	-0.0873743	0.984722	0.950082	0.964986	-0.149218	1.006	0.827984	0.867868	Undefined	Linker propensity from 2-linker dataset (George-Heringa, 2003)
MIYS990101	-0.0361038	0.73926	0.00162741	0.00702628	-0.0146845	0.72667	0.00054531	0.00328415	Hydrophobicity	Relative partition energies derived by the Bethe approximation
GEOR030105	-0.083362	0.81442	0.0577346	0.101643	-0.0984372	0.861287	0.156782	0.238905	Undefined	Linker propensity from small dataset (linker length is less than six
GEOR030106	-0.109289	1.16336	0.0243937	0.0539439	-0.15649	1.14759	0.0269601	0.0606044	Undefined	Linker propensity from medium dataset (linker length is between six and 14
GEOR030107	-0.0448567	0.888712	0.16747	0.248917	-0.0458996	0.884881	0.129351	0.207571	Undefined	Linker propensity from long dataset (linker length is greater than 14
GEOR030108	-0.0760968	1.28296	0.000256925	0.0020554	-0.15288	1.21512	0.00299772	0.0109447	Undefined	Linker propensity from helical (annotated by DSSP) dataset (George-Heringa,
GEOR030109	-0.0381391	0.994575	0.904642	0.928953	-0.041413	0.911622	0.381285	0.484624	Undefined	Linker propensity from non-helical (annotated by DSSP) dataset
MIYS990102	-0.0389725	0.730194	0.00122799	0.00591174	-0.016966	0.714919	0.000349584	0.00234782	Hydrophobicity	Optimized relative partition energies - method A (Miyazawa-Jernigan, 1999)
MIYS990103	-0.0542494	0.685902	0.000179332	0.00177375	-0.038081	0.648303	1.09456e-05	0.000313391	Hydrophobicity	Optimized relative partition energies - method B (Miyazawa-Jernigan, 1999)
MIYS990104	-0.0790856	0.682481	8.72703e-05	0.00124636	-0.0545024	0.65274	7.0823e-06	0.000214043	Hydrophobicity	Optimized relative partition energies - method C (Miyazawa-Jernigan, 1999)
MIYS990105	-0.0573181	0.702631	0.000210809	0.00190479	-0.0517741	0.701299	9.18007e-05	0.000998791	Hydrophobicity	Optimized relative partition energies - method D (Miyazawa-Jernigan, 1999)
HARY940101	-0.00422833	0.745733	0.000379625	0.0025936	-0.00573615	0.845346	0.025763	0.0586405	Undefined	Mean volumes of residues buried in protein interiors (Harpaz et al., 1994)
PONJ960101	0.00631324	0.793396	0.00741018	0.0207292	-0.00627645	0.842727	0.0364432	0.0755581	Undefined	Average volumes of residues (Pontius et al., 1996)
DIGM050101	-0.169854	1.00047	0.78144	0.843459	-0.113402	1.01607	0.644218	0.7211	Undefined	Hydrostatic pressure asymmetry index, PAI (Di Giulio, 2005)
WOLR790101	0.0310806	0.841578	0.0483573	0.0914844	0.00314027	0.83796	0.0305362	0.0667135	Undefined	Hydrophobicity index (Wolfenden et al., 1979)
OLSK800101	0.0479625	0.815192	0.0131455	0.0322819	0.0188867	0.80843	0.00672342	0.0206641	Undefined	Average internal preferences (Olsen, 1980)
KIDA850101	-0.0510527	0.814352	0.0344352	0.0701601	-0.0309241	0.805562	0.0186596	0.0450012	Undefined	Hydrophobicity-related index (Kidera et al., 1985)
MUNV940103	-0.0545233	0.705846	0.0010902	0.00557563	-0.0471433	0.716797	0.00102109	0.00478858	Beta propensity	Free energy in beta-strand conformation (Munoz-Serrano, 1994)
NADH010101	0.0850167	0.755051	0.00257831	0.00974029	0.0758244	0.736814	0.000608362	0.00347154	Hydrophobicity	Hydropathy scale based on self-information values in the two-state model (5%
NADH010102	0.0657506	0.712078	0.000480579	0.003005	0.0477676	0.69153	7.33212e-05	0.000886372	Hydrophobicity	Hydropathy scale based on self-information values in the two-state model (9%
GUYH850105	-0.098297	0.760744	0.00386212	0.0127151	-0.0521219	0.775844	0.00421971	0.0139971	Undefined	Apparent partition energies calculated from Chothia index (Guy, 1985)
ROSM880104	0.0234192	0.816606	0.0102259	0.02592	-9.53105e-05	0.817877	0.00731181	0.0219939	Undefined	Hydropathies of amino acid side chains, neutral form (Roseman, 1988)
ROSM880105	0.0547138	0.813577	0.0510585	0.0941554	0.012184	0.78087	0.0118895	0.0318615	Undefined	Hydropathies of amino acid side chains, pi-values in pH 7.0 (Roseman, 1988)
JACR890101	0.0972962	0.835661	0.0816133	0.137454	0.0598078	0.756988	0.00498823	0.0157767	Undefined	Weights from the IFH scale (Jacobs-White, 1989)
NADH010103	0.0927333	0.682217	0.000125532	0.00153264	0.0831013	0.651474	1.1917e-05	0.000324143	Hydrophobicity	Hydropathy scale based on self-information values in the two-state model (16%
BLAS910101	0.0605096	0.858848	0.135142	0.210652	0.0355374	0.753338	0.00402827	0.0136111	Undefined	Scaled side chain hydrophobicity values (Black-Mould, 1991)
NADH010104	0.0924932	0.637751	7.37636e-06	0.000308672	0.0869717	0.634381	1.95486e-06	8.86203e-05	Hydrophobicity	Hydropathy scale based on self-information values in the two-state model (20%
NADH010105	0.0958717	0.671151	6.12777e-05	0.00111117	0.0919945	0.677964	3.76771e-05	0.000661172	Hydrophobicity	Hydropathy scale based on self-information values in the two-state model (25%
PARS000101	-0.0791778	0.691767	0.000226206	0.00195327	-0.0315724	0.674372	4.06687e-05	0.000691369	Hydrophobicity	p-Values of mesophilic proteins based on the distributions of B values
PONP930101	0.0309583	0.704138	0.000139334	0.00157912	0.027354	0.680118	1.3444e-05	0.000348262	Hydrophobicity	Hydrophobicity scales (Ponnuswamy, 1993)
CORJ870104	0.0299382	0.745834	0.0041686	0.0133701	0.0209782	0.734393	0.00186878	0.00735566	Undefined	PRILS index (Cornette et al., 1987)
CORJ870105	0.0225571	0.752077	0.00315645	0.0108678	-0.0218105	0.755321	0.00241034	0.00916939	Undefined	ALTFT index (Cornette et al., 1987)
CORJ870106	0.0274174	0.72242	0.00288768	0.0102247	-0.0061755	0.721431	0.00164581	0.00694049	Undefined	ALTLS index (Cornette et al., 1987)
PUNT030102	-0.0428083	0.784551	0.00530371	0.0161354	-0.000251779	0.752595	0.000619006	0.00347154	Hydrophobicity	Knowledge-based membrane-propensity scale from 3D_Helix in MPtopo databases
VINM940101	-0.0872944	0.70386	7.90191e-05	0.00122818	-0.06301	0.715423	6.67876e-05	0.000881884	Hydrophobicity	Normalized flexibility parameters (B-values), average (Vihinen et al., 1994)
VINM940102	-0.0961485	0.690665	0.000311353	0.00228886	-0.0746271	0.71847	0.000674581	0.00356284	Hydrophobicity	Normalized flexibility parameters (B-values) for each residue surrounded by
VINM940103	-0.109624	0.625351	1.15055e-07	2.08633e-05	-0.122383	0.649314	1.78359e-07	1.94055e-05	Hydrophobicity	Normalized flexibility parameters (B-values) for each residue surrounded by
VINM940104	-0.0538149	0.781369	0.00387997	0.0127151	-0.0458832	0.760053	0.000850627	0.00415563	Hydrophobicity	Normalized flexibility parameters (B-values) for each residue surrounded by
ZHOH040101	0.0688383	0.743992	0.00781901	0.0212094	0.0602778	0.691851	0.000725654	0.00379573	Hydrophobicity	The stability scale from the knowledge-based atom-atom potential (Zhou-Zhou,
ZHOH040102	0.019259	0.767841	0.00653347	0.0187064	0.00228905	0.725166	0.000748407	0.00380498	Hydrophobicity	The relative stability scale extracted from mutation experiments (Zhou-Zhou,
ENGD860101	-0.0855985	0.81633	0.0541663	0.0982927	-0.00185886	0.762942	0.00769559	0.0228765	Undefined	Hydrophobicity index (Engelman et al., 1986)
ZHOH040103	0.0913948	0.670298	8.26038e-05	0.00124612	0.065155	0.659977	2.53529e-05	0.000510814	Hydrophobicity	Buriability (Zhou-Zhou, 2004)
